# Supplementary material for: Powerful Potential of Polyfluoroalkyl-Containing 4-Arylhydrazinylidenepyrazol-3-ones for Pharmaceuticals
Source: MDPI journal article supplement (doi:10.3390/molecules28010059), 2022-12-21

# Powerful Potential of Polyfluoroalkyl-containing 4-Arylhydrazinylidenepyrazol-3-ones for Pharmaceuticals

Yanina V. Burgart <sup>1</sup>, Natalia A. Elkina <sup>1</sup>, Evgeny V. Shchegolkov <sup>1</sup>, Olga P. Krasnykh <sup>2</sup>, Galina F. Makhaeva <sup>3</sup>, Galina A. Triandafilova <sup>2</sup>, Sergey Yu. Solodnikov <sup>2</sup>, Natalia P. Boltneva <sup>3</sup>, Elena V. Rudakova <sup>3</sup>, Nadezhda V. Kovaleva <sup>3</sup>, Olga G. Serebryakova <sup>3</sup>, Mariya V. Ulitko <sup>4</sup>, Sophia S. Borisevich <sup>1</sup>, Natalia A. Gerasimova <sup>5</sup>, Natalia P. Evstigneeva <sup>5</sup>, Sergey A. Kozlov <sup>6</sup>, Yuliya V. Korolkova <sup>6</sup>, Artem S. Minin <sup>4,7</sup>, Anna V. Belousova <sup>8</sup>, Evgenii S. Mozhaitsev <sup>9</sup>, Artem M. Klabukov <sup>10</sup> and Victor I. Saloutin <sup>1,\*</sup>

<sup>1</sup> Postovsky Institute of Organic Synthesis of the Ural Branch of the Russian Academy of Science (IOS UB RAS), S. Kovalevskoi St., 22, Ekaterinburg 620108, Russia; ya.burgart@yandex.ru (Y.V.B.); natali741258@mail.ru (N.A.E.); e.schegolkov@yandex.ru (E.V.S.); monrel@mail.ru (S.S.B.)

<sup>2</sup> Scientific and Educational Center for Applied Chemical-Biological Research, Perm National Poly-technic University, Komsomolsky Av., 29, Perm 614990, Russia; ol.krasnykh@gmail.com (O.P.K.); lindick@yandex.ru (G.A.T.); s.u.solodnikov@rambler.ru (S.Y.S.)

<sup>3</sup> Institute of Physiologically Active Compounds at Federal Research Center of Problems of Chemical Physics and Medicinal Chemistry, Russian Academy of Sciences (IPAC RAS), Severny proezd 1, Chernogolovka 142432, Russia; gmakh@ipac.ac.ru (G.F.M.); kovalevanv@ipac.ac.ru (N.V.K.); boltneva@ipac.ac.ru (N.P.B.); rudakova@ipac.ac.ru (E.V.R.); sog@ipac.ac.ru (O.G.S.)

<sup>4</sup> Institute of Natural Sciences and Mathematics of the Ural Federal University Named after the First President of Russia B. N. Yeltsin, Lenina Av., 51, Ekaterinburg 620083, Russia; mv.ulitko@urfu.ru (M.V.U.)

<sup>5</sup> Ural Research Institute for Dermatology, Venereology and Immunopathology, Shcherbakova St., 8, Ekaterinburg 620076, Russia; ngerasimova2010@gmail.com (N.A.G.); evstigneeva-np@yandex.ru (N.P.E.)

<sup>6</sup> Shemyakin-Ovchinnikov Institute of Bioorganic Chemistry RAS, Miklukho-Maklaya St., 16/10, Moscow 117997, Russia; serg@ibch.ru (S.A.K.); july@mx.ibch.ru (Y.V.K.)

<sup>7</sup> M.N. Mikheev Institute of Metal Physics of the Ural Branch of the Russian Academy of Sciences, S. Kovalevskoi 18, Ekaterinburg 620108, Russia; calamatica@gmail.com (A.S.M.)

<sup>8</sup> Institute of Immunology and Physiology of the Ural Branch of the Russian Academy of Sciences, Pervomayskaya 106, Ekaterinburg 620108, Russia (IIP UB RAS); a1b2v3@mail.ru (A.V.B.)

<sup>9</sup> N.N. Vorozhtsov Novosibirsk Institute of Organic Chemistry of Siberian Branch of Russian Academy of Sciences, 9 Lavrentiev Avenue, Novosibirsk, 630090, Russia; mozhaitsev@gmail.com (E.S.M.)

<sup>10</sup> Smorodintsev Research Institute of Influenza of the Ministry of Health of the Russian Federation, 15/17 prof. Popov street, Saint-Petersburg, 197376, Russia; temaklab@gmail.com (A.M.K.)

\* Correspondence: saloutin@ios.uran.ru

## Table of contents

|                                                                                                                                            |    |
|--------------------------------------------------------------------------------------------------------------------------------------------|----|
| Table S1. <i>In silico</i> ADME predictions of pyrazolones <b>5-9</b> .....                                                                | 5  |
| Table S2. Antifungal activity of 4-arylhydrazinylidenepyrazolones <b>5-9</b> .....                                                         | 7  |
| Figure S1. Z, E isomers of compound <b>5a</b> .....                                                                                        | 8  |
| Figure S2. Images of Vero cells stained with compounds <b>5f</b> (A) and <b>9a</b> (B) exciting by lasers with different wavelengths. .... | 9  |
| Figure S3. <sup>1</sup> H NMR spectrum of compound <b>5a</b> .....                                                                         | 10 |
| Figure S4. <sup>13</sup> C NMR spectrum of compound <b>5a</b> .....                                                                        | 11 |
| Figure S5. <sup>19</sup> F NMR spectrum of compound <b>5a</b> .....                                                                        | 12 |
| Figure S6. <sup>1</sup> H NMR spectrum of compound <b>5b</b> .....                                                                         | 13 |
| Figure S7. <sup>19</sup> F NMR spectrum of compound <b>5b</b> .....                                                                        | 14 |

|                                                                      |    |
|----------------------------------------------------------------------|----|
| Figure S8. <sup>1</sup> H NMR spectrum of compound <b>5c</b> .....   | 15 |
| Figure S9. <sup>13</sup> C NMR spectrum of compound <b>5c</b> .....  | 16 |
| Figure S10. <sup>19</sup> F NMR spectrum of compound <b>5c</b> ..... | 17 |
| Figure S11. <sup>1</sup> H NMR spectrum of compound <b>5d</b> .....  | 18 |
| Figure S12. <sup>19</sup> F NMR spectrum of compound <b>5d</b> ..... | 19 |
| Figure S13. <sup>1</sup> H NMR spectrum of compound <b>5e</b> .....  | 20 |
| Figure S14. <sup>19</sup> F NMR spectrum of compound <b>5e</b> ..... | 21 |
| Figure S15. <sup>1</sup> H NMR spectrum of compound <b>5f</b> .....  | 22 |
| Figure S16. <sup>13</sup> C NMR spectrum of compound <b>5f</b> ..... | 23 |
| Figure S17. <sup>19</sup> F NMR spectrum of compound <b>5f</b> ..... | 24 |
| Figure S18. <sup>1</sup> H NMR spectrum of compound <b>5g</b> .....  | 25 |
| Figure S19. <sup>13</sup> C NMR spectrum of compound <b>5g</b> ..... | 26 |
| Figure S20. <sup>19</sup> F NMR spectrum of compound <b>5g</b> ..... | 27 |
| Figure S21. <sup>1</sup> H NMR spectrum of compound <b>5h</b> .....  | 28 |
| Figure S22. <sup>13</sup> C NMR spectrum of compound <b>5h</b> ..... | 29 |
| Figure S23. <sup>19</sup> F NMR spectrum of compound <b>5h</b> ..... | 30 |
| Figure S24. <sup>1</sup> H NMR spectrum of compound <b>5i</b> .....  | 31 |
| Figure S25. <sup>13</sup> C NMR spectrum of compound <b>5i</b> ..... | 32 |
| Figure S26. <sup>19</sup> F NMR spectrum of compound <b>5i</b> ..... | 33 |
| Figure S27. <sup>1</sup> H NMR spectrum of compound <b>5j</b> .....  | 34 |
| Figure S28. <sup>13</sup> C NMR spectrum of compound <b>5j</b> ..... | 35 |
| Figure S29. <sup>19</sup> F NMR spectrum of compound <b>5j</b> ..... | 36 |
| Figure S30. <sup>1</sup> H NMR spectrum of compound <b>5k</b> .....  | 37 |
| Figure S31. <sup>13</sup> C NMR spectrum of compound <b>5k</b> ..... | 38 |
| Figure S32. <sup>19</sup> F NMR spectrum of compound <b>5k</b> ..... | 39 |
| Figure S33. <sup>1</sup> H NMR spectrum of compound <b>5l</b> .....  | 40 |
| Figure S34. <sup>13</sup> C NMR spectrum of compound <b>5l</b> ..... | 41 |
| Figure S35. <sup>19</sup> F NMR spectrum of compound <b>5l</b> ..... | 42 |
| Figure S36. <sup>1</sup> H NMR spectrum of compound <b>5m</b> .....  | 43 |
| Figure S37. <sup>13</sup> C NMR spectrum of compound <b>5m</b> ..... | 44 |
| Figure S38. <sup>19</sup> F NMR spectrum of compound <b>5m</b> ..... | 45 |
| Figure S39. <sup>1</sup> H NMR spectrum of compound <b>5n</b> .....  | 46 |
| Figure S40. <sup>13</sup> C NMR spectrum of compound <b>5n</b> ..... | 47 |
| Figure S41. <sup>19</sup> F NMR spectrum of compound <b>5n</b> ..... | 48 |
| Figure S42. <sup>1</sup> H NMR spectrum of compound <b>5o</b> .....  | 49 |
| Figure S43. <sup>13</sup> C NMR spectrum of compound <b>5o</b> ..... | 50 |
| Figure S44. <sup>19</sup> F NMR spectrum of compound <b>5o</b> ..... | 51 |

|                                                                      |    |
|----------------------------------------------------------------------|----|
| Figure S45. $^1\text{H}$ NMR spectrum of compound <b>5p</b> .....    | 52 |
| Figure S46. $^{13}\text{C}$ NMR spectrum of compound <b>5p</b> ..... | 53 |
| Figure S47. $^{19}\text{F}$ NMR spectrum of compound <b>5p</b> ..... | 54 |
| Figure S48. $^1\text{H}$ NMR spectrum of compound <b>5q</b> .....    | 55 |
| Figure S49. $^{19}\text{F}$ NMR spectrum of compound <b>5q</b> ..... | 56 |
| Figure S50. $^1\text{H}$ NMR spectrum of compound <b>5r</b> .....    | 57 |
| Figure S51. $^{13}\text{C}$ NMR spectrum of compound <b>5r</b> ..... | 58 |
| Figure S52. $^{19}\text{F}$ NMR spectrum of compound <b>5r</b> ..... | 59 |
| Figure S53. $^1\text{H}$ NMR spectrum of compound <b>6a</b> .....    | 60 |
| Figure S54. $^{13}\text{C}$ NMR spectrum of compound <b>6a</b> ..... | 61 |
| Figure S55. $^{19}\text{F}$ NMR spectrum of compound <b>6a</b> ..... | 62 |
| Figure S56. $^1\text{H}$ NMR spectrum of compound <b>6b</b> .....    | 63 |
| Figure S57. $^{13}\text{C}$ NMR spectrum of compound <b>6b</b> ..... | 64 |
| Figure S58. $^{19}\text{F}$ NMR spectrum of compound <b>6b</b> ..... | 65 |
| Figure S59. $^1\text{H}$ NMR spectrum of compound <b>6c</b> .....    | 66 |
| Figure S60. $^{13}\text{C}$ NMR spectrum of compound <b>6c</b> ..... | 67 |
| Figure S61. $^{19}\text{F}$ NMR spectrum of compound <b>6c</b> ..... | 68 |
| Figure S62. $^1\text{H}$ NMR spectrum of compound <b>6d</b> .....    | 69 |
| Figure S63. $^{13}\text{C}$ NMR spectrum of compound <b>6d</b> ..... | 70 |
| Figure S64. $^{19}\text{F}$ NMR spectrum of compound <b>6d</b> ..... | 71 |
| Figure S65. $^1\text{H}$ NMR spectrum of compound <b>6e</b> .....    | 72 |
| Figure S66. $^{13}\text{C}$ NMR spectrum of compound <b>6e</b> ..... | 73 |
| Figure S67. $^{19}\text{F}$ NMR spectrum of compound <b>6e</b> ..... | 74 |
| Figure S68. $^1\text{H}$ NMR spectrum of compound <b>6f</b> .....    | 75 |
| Figure S69. $^{13}\text{C}$ NMR spectrum of compound <b>6f</b> ..... | 76 |
| Figure S70. $^{19}\text{F}$ NMR spectrum of compound <b>6f</b> ..... | 77 |
| Figure S71. $^1\text{H}$ NMR spectrum of compound <b>6g</b> .....    | 78 |
| Figure S72. $^{13}\text{C}$ NMR spectrum of compound <b>6g</b> ..... | 79 |
| Figure S73. $^{19}\text{F}$ NMR spectrum of compound <b>6g</b> ..... | 80 |
| Figure S74. $^1\text{H}$ NMR spectrum of compound <b>6h</b> .....    | 81 |
| Figure S75. $^{13}\text{C}$ NMR spectrum of compound <b>6h</b> ..... | 82 |
| Figure S76. $^{19}\text{F}$ NMR spectrum of compound <b>6h</b> ..... | 83 |
| Figure S77. $^1\text{H}$ NMR spectrum of compound <b>6i</b> .....    | 84 |
| Figure S78. $^{19}\text{F}$ NMR spectrum of compound <b>6i</b> ..... | 85 |
| Figure S79. $^1\text{H}$ NMR spectrum of compound <b>7a</b> .....    | 86 |
| Figure S80. $^{13}\text{C}$ NMR spectrum of compound <b>7a</b> ..... | 87 |
| Figure S81. $^{19}\text{F}$ NMR spectrum of compound <b>7a</b> ..... | 88 |

|                                                                      |     |
|----------------------------------------------------------------------|-----|
| Figure S82. $^1\text{H}$ NMR spectrum of compound <b>7b</b> .....    | 89  |
| Figure S83. $^{13}\text{C}$ NMR spectrum of compound <b>7b</b> ..... | 90  |
| Figure S84. $^{19}\text{F}$ NMR spectrum of compound <b>7b</b> ..... | 91  |
| Figure S85. $^1\text{H}$ NMR spectrum of compound <b>8a</b> .....    | 92  |
| Figure S86. $^{13}\text{C}$ NMR spectrum of compound <b>8a</b> ..... | 93  |
| Figure S87. $^{19}\text{F}$ NMR spectrum of compound <b>8a</b> ..... | 94  |
| Figure S88. $^1\text{H}$ NMR spectrum of compound <b>8b</b> .....    | 95  |
| Figure S89. $^{13}\text{C}$ NMR spectrum of compound <b>8b</b> ..... | 96  |
| Figure S90. $^{19}\text{F}$ NMR spectrum of compound <b>8b</b> ..... | 97  |
| Figure S91. $^1\text{H}$ NMR spectrum of compound <b>9a</b> .....    | 98  |
| Figure S92. $^{13}\text{C}$ NMR spectrum of compound <b>9a</b> ..... | 99  |
| Figure S93. $^1\text{H}$ NMR spectrum of compound <b>9b</b> .....    | 100 |
| Figure S94. $^{13}\text{C}$ NMR spectrum of compound <b>9b</b> ..... | 101 |



Table S1. *In silico* ADME predictions of pyrazolones 5-9

| ID of ligand | dipole | IP (eV) | EA (eV) | SASA | FOSA | FISA | PISA | WPSA | volume | glob | QPpolrz | QLogPC16 | QLogPoct |
|--------------|--------|---------|---------|------|------|------|------|------|--------|------|---------|----------|----------|
| min          | 1.0    | 7.9     | 0.9     | 300  | 0    | 7    | 0    | 0    | 500    | 0.75 | 13.0    | 4.0      | 8.0      |
| max          | 12.5   | 10.5    | 1.7     | 1000 | 750  | 330  | 450  | 175  | 2000   | 0.95 | 70.0    | 18.0     | 35.0     |
| 5a           | 2.2    | 8.9     | 1.6     | 456  | 1    | 128  | 212  | 115  | 742    | 0.87 | 23.6    | 6.9      | 12.0     |
| 5b           | 2.6    | 8.7     | 1.5     | 621  | 89   | 64   | 354  | 114  | 1054   | 0.81 | 37.5    | 10.2     | 15.2     |
| 5c           | 2.5    | 9.0     | 1.7     | 485  | 1    | 128  | 164  | 192  | 795    | 0.86 | 25.3    | 7.6      | 12.9     |
| 5d           | 2.5    | 8.8     | 1.6     | 523  | 179  | 73   | 156  | 115  | 865    | 0.84 | 28.0    | 7.0      | 11.7     |
| 5e           | 2.6    | 8.8     | 1.5     | 589  | 1    | 64   | 410  | 115  | 994    | 0.82 | 35.6    | 10.0     | 14.6     |
| 5f           | 2.4    | 8.8     | 1.6     | 488  | 89   | 128  | 157  | 115  | 802    | 0.85 | 25.5    | 7.0      | 12.6     |
| 5g           | 1.3    | 8.5     | 1.5     | 627  | 94   | 64   | 354  | 115  | 1070   | 0.81 | 37.5    | 10.3     | 15.5     |
| 5h           | 3.8    | 8.9     | 1.6     | 598  | 1    | 64   | 372  | 161  | 1010   | 0.81 | 35.9    | 9.5      | 15.0     |
| 5i           | 0.9    | 8.9     | 1.6     | 604  | 1    | 57   | 373  | 173  | 1031   | 0.82 | 36.7    | 10.4     | 15.2     |
| 5j           | 2.7    | 8.9     | 1.6     | 609  | 1    | 54   | 348  | 207  | 1057   | 0.82 | 37.5    | 10.8     | 15.7     |
| 5k           | 3.5    | 8.9     | 1.6     | 618  | 1    | 64   | 361  | 192  | 1047   | 0.81 | 37.3    | 10.7     | 15.6     |
| 5l           | 2.1    | 9.1     | 1.8     | 714  | 142  | 118  | 340  | 114  | 1218   | 0.77 | 42.6    | 12.1     | 18.1     |
| 5m           | 7.7    | 9.3     | 1.8     | 675  | 84   | 142  | 333  | 115  | 1161   | 0.79 | 40.9    | 11.6     | 19.5     |
| 5n           | 9.0    | 9.4     | 1.9     | 660  | 1    | 205  | 338  | 116  | 1130   | 0.79 | 39.1    | 12.3     | 22.6     |
| 5o           | 8.5    | 9.4     | 1.9     | 658  | 1    | 201  | 340  | 117  | 1124   | 0.79 | 38.8    | 12.0     | 20.6     |
| 5p           | 6.4    | 8.9     | 1.8     | 688  | 89   | 202  | 281  | 116  | 1184   | 0.79 | 40.7    | 12.4     | 22.5     |
| 5r           | 5.2    | 8.9     | 1.7     | 702  | 172  | 140  | 275  | 115  | 1214   | 0.78 | 42.5    | 11.7     | 19.5     |
| 5s           | 2.9    | 8.7     | 1.5     | 653  | 177  | 64   | 298  | 115  | 1114   | 0.80 | 39.3    | 10.4     | 15.7     |
| 6a           | 2.7    | 8.8     | 1.6     | 521  | 89   | 122  | 149  | 162  | 876    | 0.85 | 27.8    | 7.4      | 13.5     |
| 6b           | 2.7    | 8.8     | 1.6     | 649  | 89   | 56   | 343  | 161  | 1121   | 0.80 | 39.4    | 10.4     | 16.0     |
| 6c           | 1.2    | 8.9     | 1.7     | 631  | 0    | 50   | 361  | 219  | 1097   | 0.82 | 38.6    | 10.7     | 16.0     |
| 6d           | 4.4    | 9.0     | 1.7     | 641  | 0    | 56   | 351  | 233  | 1105   | 0.81 | 38.9    | 10.8     | 16.3     |
| 6e           | 3.6    | 9.3     | 1.5     | 650  | 0    | 45   | 336  | 269  | 1139   | 0.81 | 40.1    | 11.2     | 16.8     |
| 6f           | 1.8    | 8.9     | 1.8     | 655  | 0    | 50   | 314  | 291  | 1142   | 0.81 | 40.0    | 11.3     | 16.7     |
| 6g           | 2.1    | 9.1     | 1.8     | 746  | 141  | 112  | 332  | 161  | 1292   | 0.77 | 44.9    | 12.5     | 19.0     |
| 6h           | 7.1    | 9.4     | 1.9     | 703  | 84   | 135  | 323  | 161  | 1229   | 0.79 | 42.9    | 11.9     | 20.1     |
| 7a           | 2.8    | 8.8     | 1.7     | 551  | 89   | 118  | 149  | 195  | 937    | 0.84 | 29.6    | 7.7      | 14.3     |
| 7b           | 2.9    | 8.8     | 1.6     | 687  | 88   | 56   | 343  | 200  | 1198   | 0.79 | 41.9    | 10.9     | 17.0     |
| 8a           | 2.9    | 8.8     | 1.7     | 597  | 88   | 121  | 149  | 239  | 1031   | 0.83 | 32.7    | 8.3      | 15.5     |

|           |     |     |     |     |     |     |     |     |      |      |      |      |      |
|-----------|-----|-----|-----|-----|-----|-----|-----|-----|------|------|------|------|------|
| <b>8b</b> | 3.4 | 8.7 | 1.6 | 738 | 88  | 53  | 352 | 245 | 1290 | 0.78 | 45.0 | 11.6 | 18.3 |
| <b>9a</b> | 1.7 | 8.6 | 1.2 | 470 | 174 | 134 | 161 | 0   | 763  | 0.86 | 24.0 | 7.5  | 11.5 |
| <b>9b</b> | 1.3 | 8.5 | 1.1 | 602 | 174 | 70  | 358 | 0   | 1015 | 0.81 | 36.0 | 10.6 | 14.1 |

dipole – computed dipole moment of the molecule;

IP (eV) – PM3 calculated ionization potential (negative of HOMO energy);

EA (eV) – PM3 calculated electron affinity (negative of LUMO energy);

SASA – total solvent accessible surface area (SASA) in square angstroms using a probe with a 1.4 Å radius;

FOSA – hydrophobic component of the SASA (saturated carbon and attached hydrogen);

FISA – hydrophilic component of the SASA (SASA on N. O. H on heteroatoms. carbonyl C);

PISA –  $\pi$  (carbon and attached hydrogen) component of the SASA;

WPSA – weakly polar component of the SASA (halogens. P. and S);

volume – total solvent-accessible volume in cubic angstroms using a probe with a 1.4 Å radius;

glob – globularity descriptor.  $(4\pi r^2)/(SASA)$ . where r is the radius of a sphere with a volume equal to the molecular volume. Globularity is 1.0 for a spherical molecule;

QPpolrz – predicted polarizability in cubic angstroms;

QPlogPC16 – predicted hexadecane/gas partition coefficient;

QPlogPoct – predicted octanol/gas partition coefficient.

Table S2. Antifungal activity of 4-arylhydrazinylidenepyrazolones 5-9

| No          | Compounds                     |                                                                  |                      | MIC (µg/ml) for fungi strains inhibition |                     |                 |                    |
|-------------|-------------------------------|------------------------------------------------------------------|----------------------|------------------------------------------|---------------------|-----------------|--------------------|
|             | R <sup>F</sup>                | R <sup>1</sup>                                                   | R <sup>2</sup>       | <i>T. rubrum</i>                         | <i>E. floccosum</i> | <i>M. canis</i> | <i>C. albicans</i> |
| <b>5b</b>   | CF <sub>3</sub>               | H                                                                | Me-4                 | 50                                       | >200                | 100             | 200                |
| <b>5c</b>   | CF <sub>3</sub>               | H                                                                | Br-4                 | <b>12.5</b>                              | <b>12.5</b>         | <b>25</b>       | >200               |
| <b>5d</b>   | CF <sub>3</sub>               | Me                                                               | Me-4                 | 200                                      | 200                 | 200             | >200               |
| <b>5e</b>   | CF <sub>3</sub>               | Ph                                                               | H                    | 200                                      | 200                 | 200             | >200               |
| <b>5f</b>   | CF <sub>3</sub>               | Ph                                                               | Me-4                 | >200                                     | 200                 | 200             | 200                |
| <b>5h</b>   | CF <sub>3</sub>               | Ph                                                               | F-4                  | >200                                     | >200                | >200            | >200               |
| <b>5i</b>   | CF <sub>3</sub>               | Ph                                                               | Cl-2                 | >200                                     | >200                | >200            | >200               |
| <b>5j</b>   | CF <sub>3</sub>               | Ph                                                               | Cl <sub>2</sub> -2,6 | >200                                     | >200                | >200            | >200               |
| <b>5k</b>   | CF <sub>3</sub>               | Ph                                                               | Br-4                 | >200                                     | >200                | >200            | >200               |
| <b>5m</b>   | CF <sub>3</sub>               | Ph                                                               | SO <sub>2</sub> Me-4 | 100                                      | >200                | >200            | >200               |
| <b>5p</b>   | CF <sub>3</sub>               | C <sub>6</sub> H <sub>4</sub> SO <sub>2</sub> NH <sub>2</sub> -4 | Me-4                 | >200                                     | >200                | >200            | >200               |
| <b>5r</b>   | CF <sub>3</sub>               | C <sub>6</sub> H <sub>4</sub> SO <sub>2</sub> Me-4               | Me-4                 | >200                                     | >200                | >200            | >200               |
| <b>6c</b>   | C <sub>2</sub> F <sub>5</sub> | Ph                                                               | Cl-2                 | 200                                      | >200                | >200            | >200               |
| <b>6d</b>   | C <sub>2</sub> F <sub>5</sub> | Ph                                                               | Cl-3                 | >200                                     | 200                 | >200            | >200               |
| <b>6e</b>   | C <sub>2</sub> F <sub>5</sub> | Ph                                                               | Cl <sub>2</sub> -2,6 | >200                                     | 200                 | >200            | >200               |
| <b>6f</b>   | C <sub>2</sub> F <sub>5</sub> | Ph                                                               | Cl <sub>2</sub> -2,4 | >200                                     | 200                 | >200            | >200               |
| <b>6g</b>   | C <sub>2</sub> F <sub>5</sub> | Ph                                                               | CO <sub>2</sub> Et-4 | >200                                     | >200                | >200            | >200               |
| <b>6h</b>   | C <sub>2</sub> F <sub>5</sub> | Ph                                                               | SO <sub>2</sub> Me-4 | >200                                     | >200                | >200            | >200               |
| <b>7a</b>   | C <sub>3</sub> F <sub>7</sub> | H                                                                | Me-4                 | >200                                     | 200                 | >200            | >200               |
| <b>8a</b>   | C <sub>4</sub> F <sub>9</sub> | H                                                                | Me-4                 | >200                                     | >200                | >200            | >200               |
| <b>9b</b>   | Me                            | Ph                                                               | Me-4                 | >200                                     | >200                | >200            | >200               |
| Fluconazole |                               |                                                                  |                      | 3.12                                     | 1.56                | 3.12            | 1.56               |

Figure S1. Z, E isomers of compound 5a.

B3LYP-D3/6-31G\*\*(gas phase)

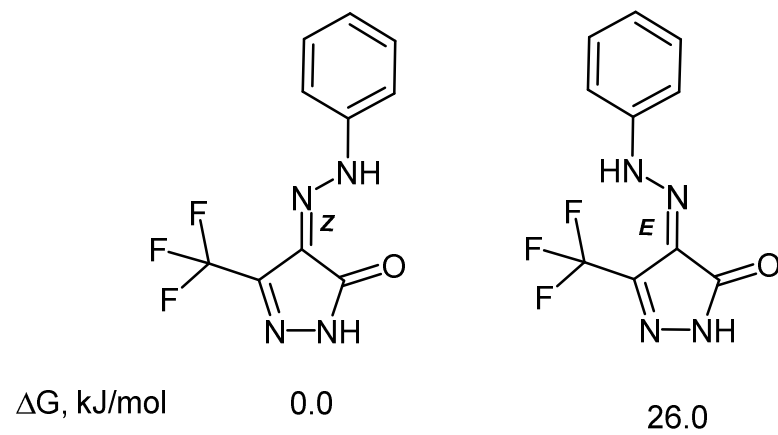

Figure S2. Images of Vero cells stained with compounds **5f** (A) and **9a** (B) exciting by lasers with different wavelengths.

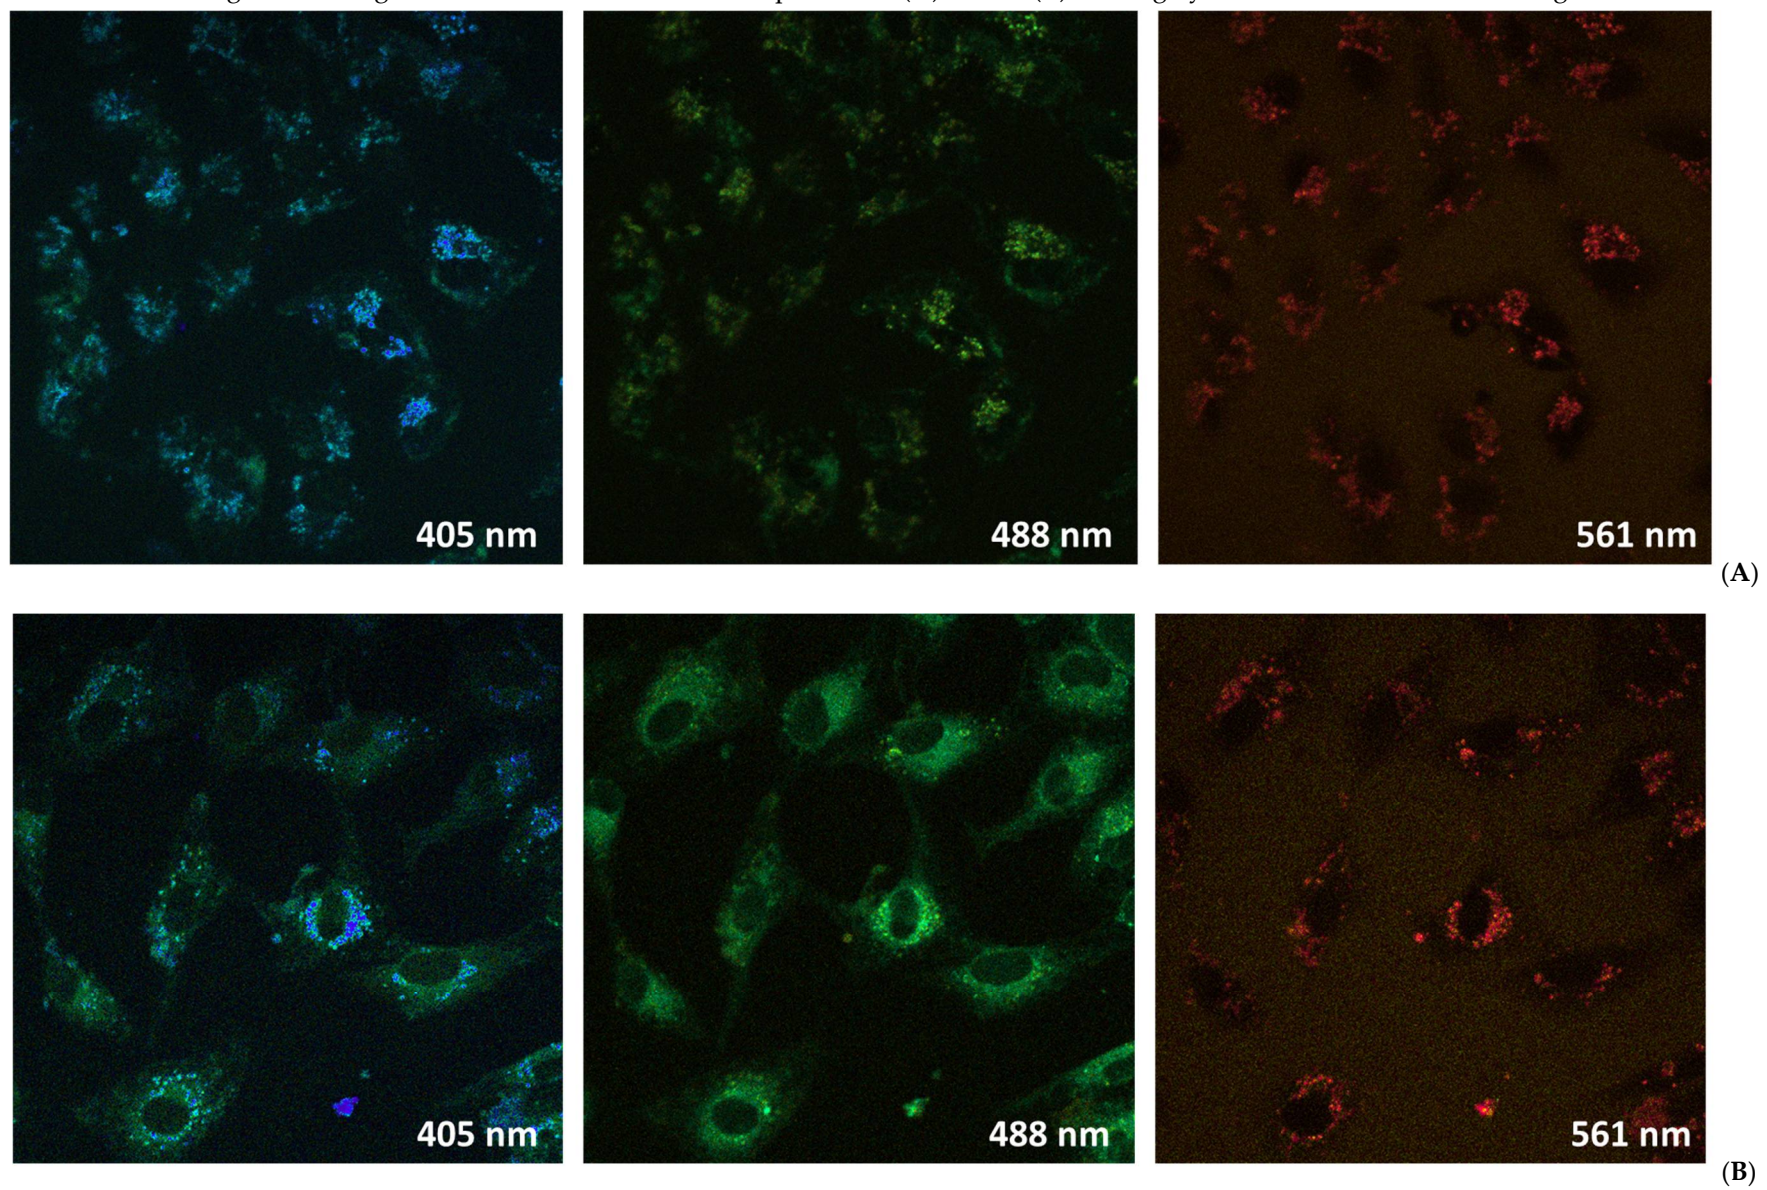

Figure S3. <sup>1</sup>H NMR spectrum of compound 5a

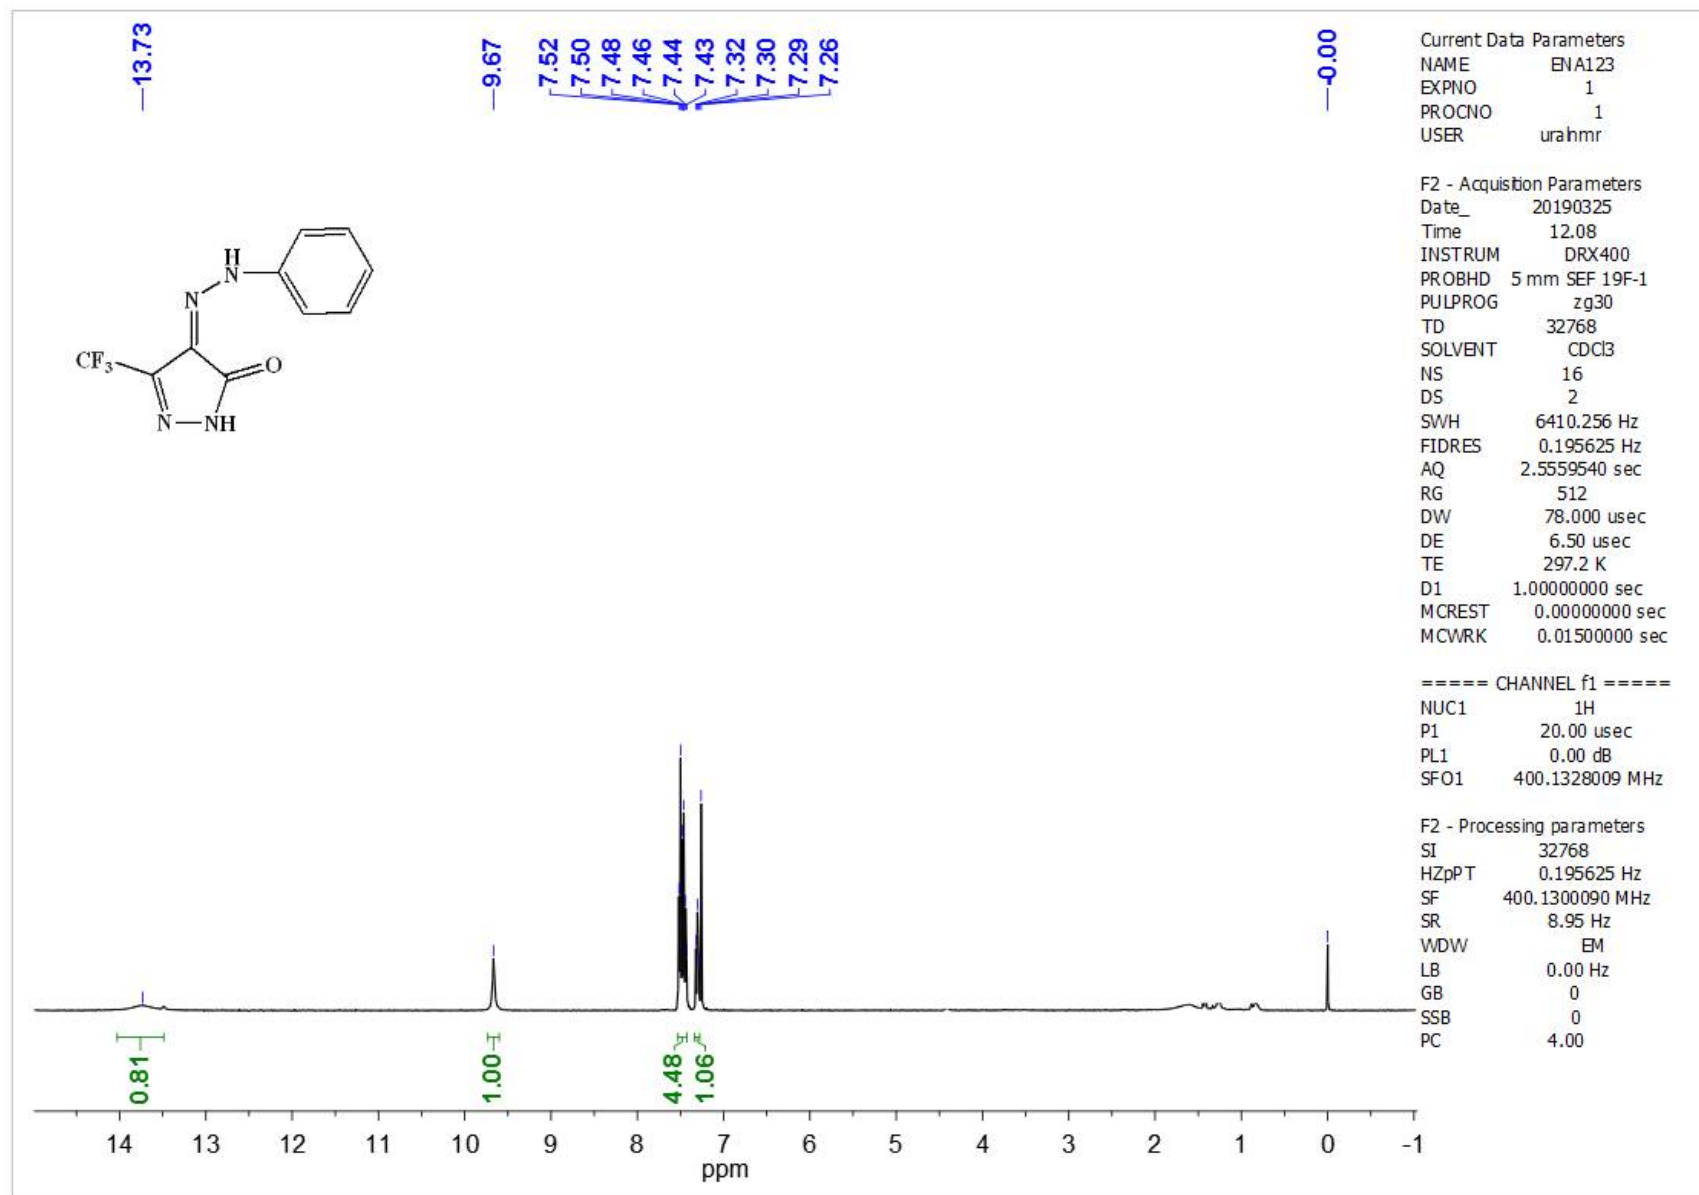



Figure S4.  $^{13}\text{C}$  NMR spectrum of compound 5a

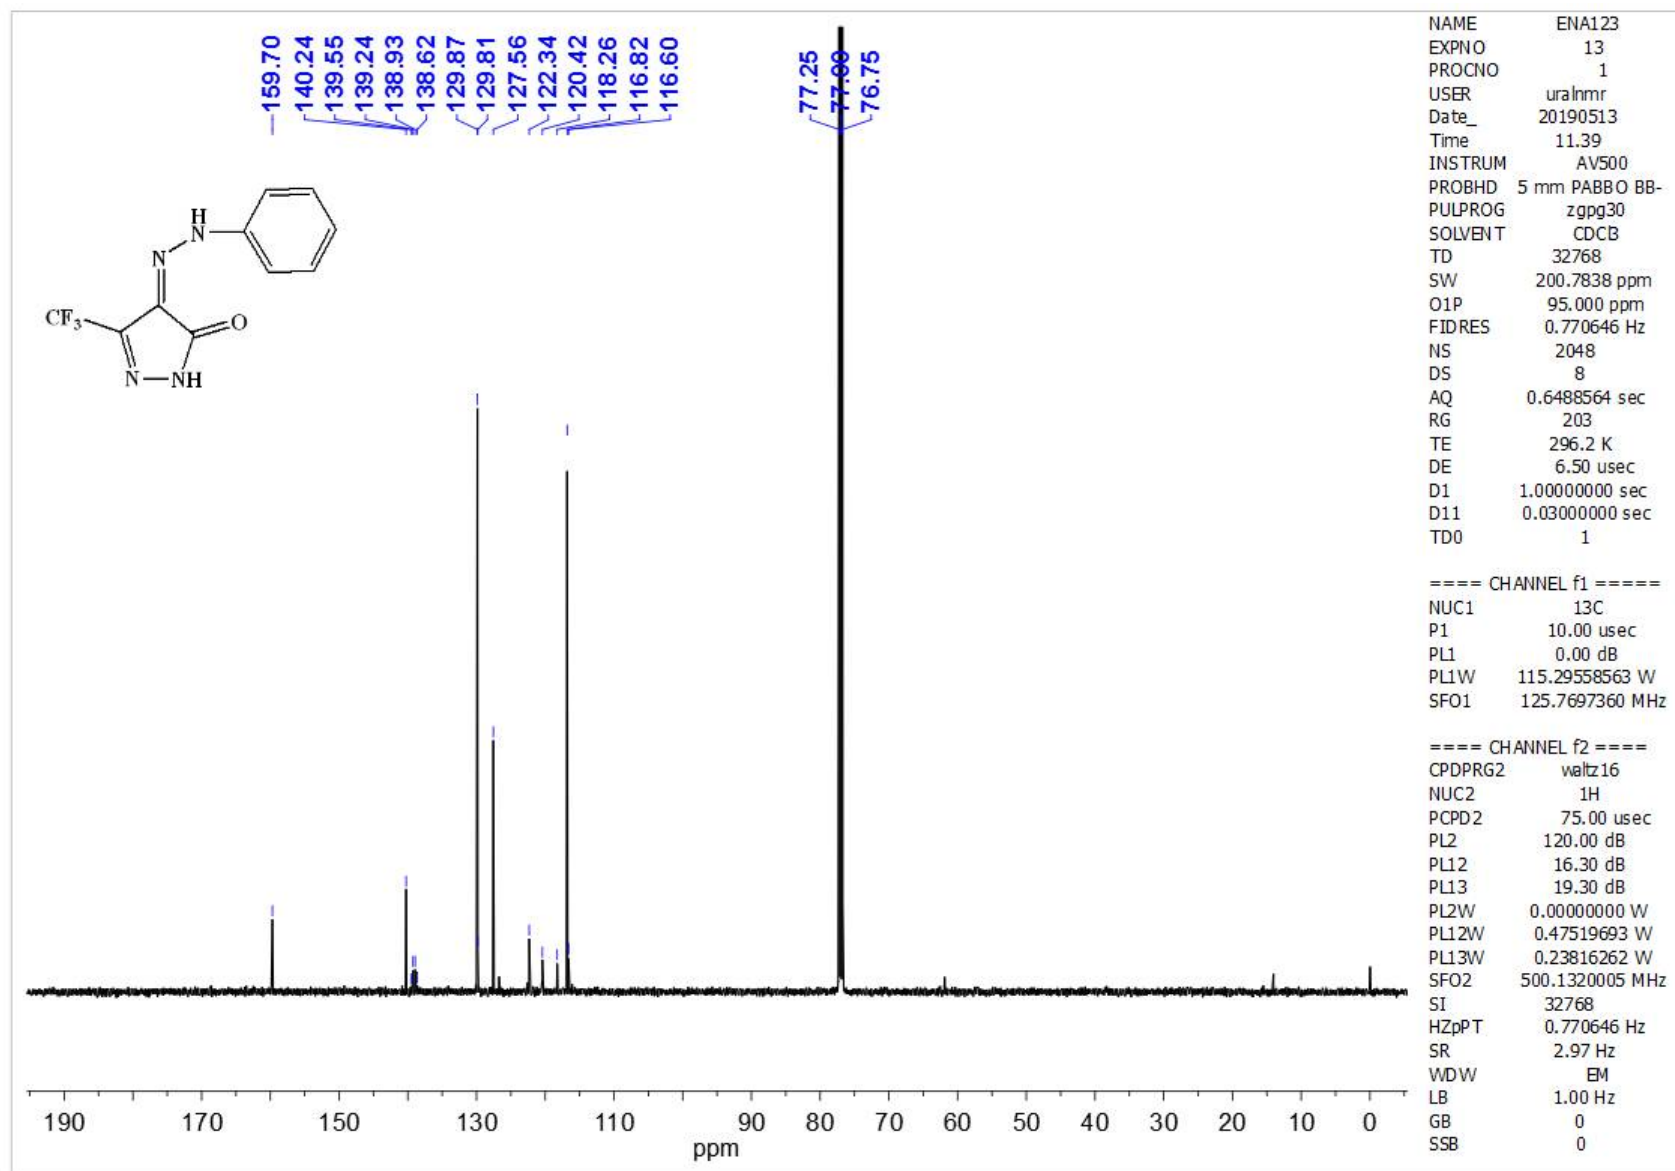

Figure S5.  $^{19}\text{F}$  NMR spectrum of compound **5a**

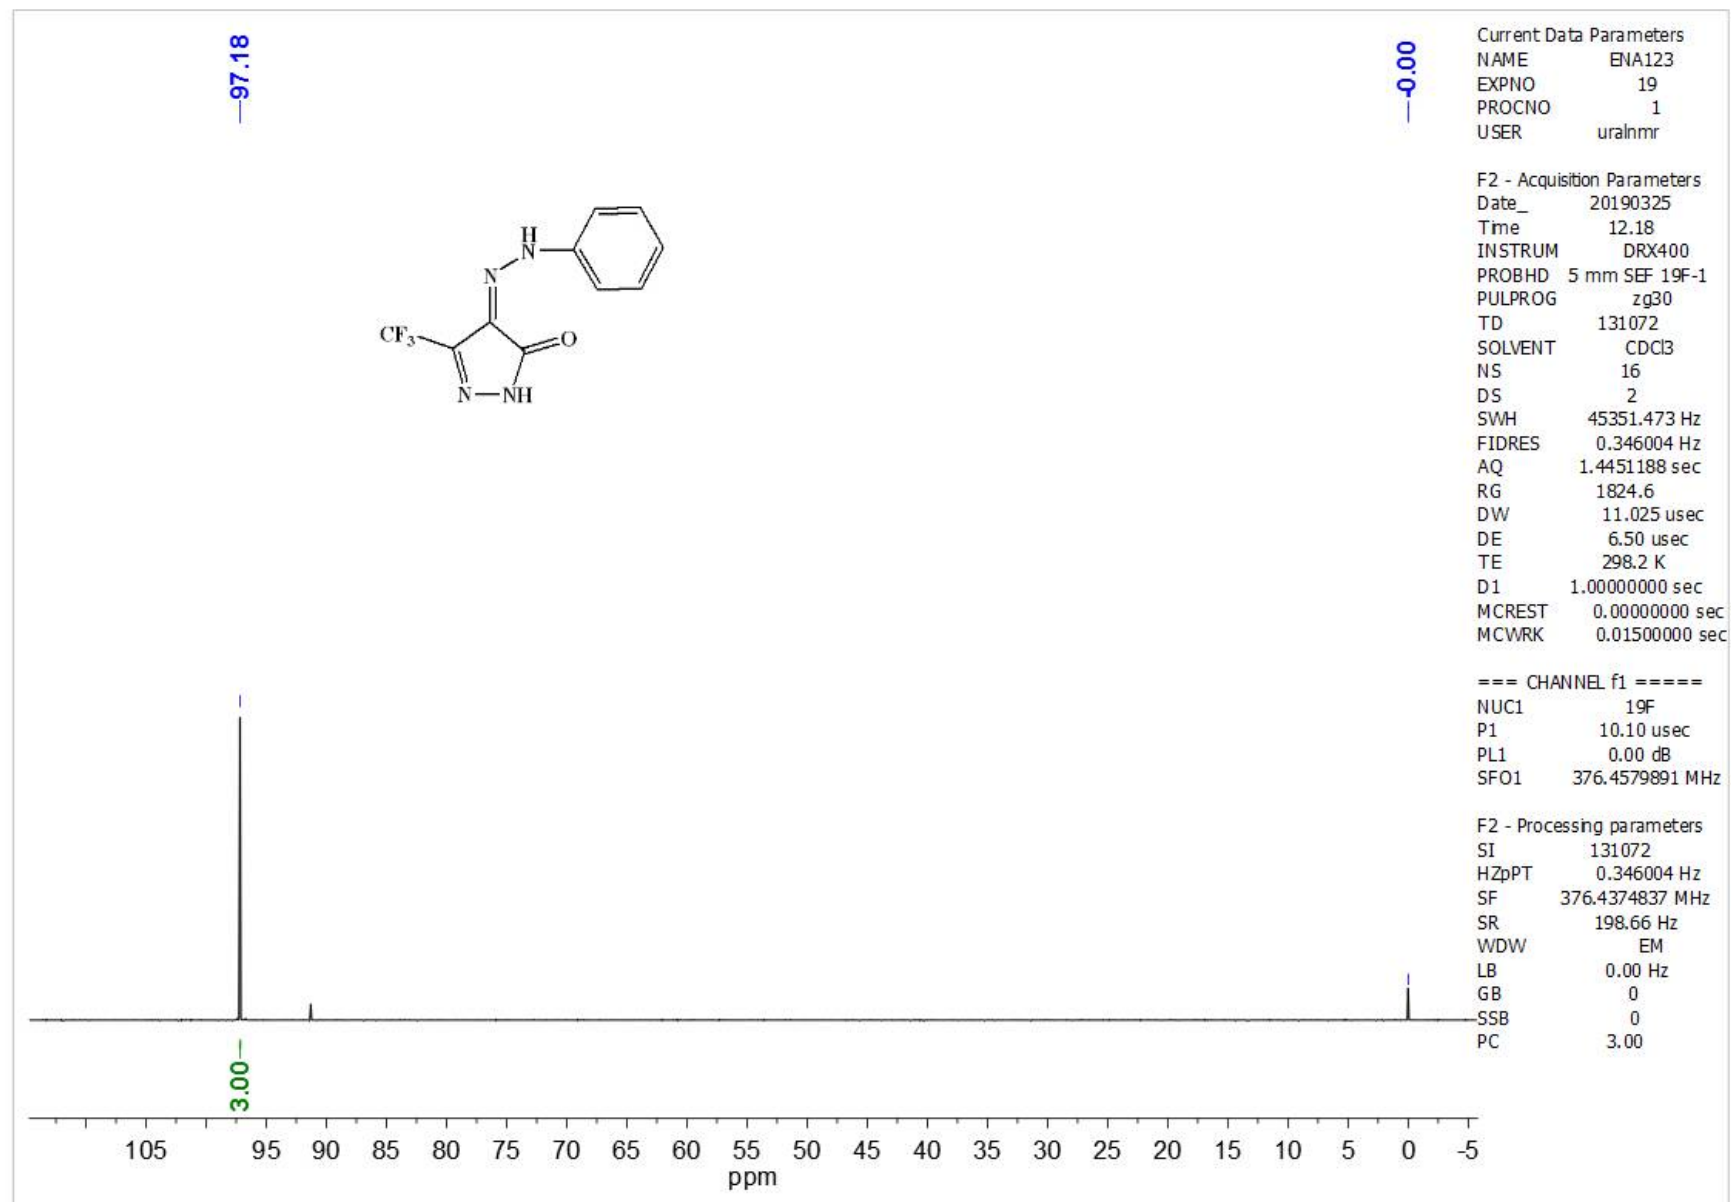



Figure S6.  $^1\text{H}$  NMR spectrum of compound **5b**

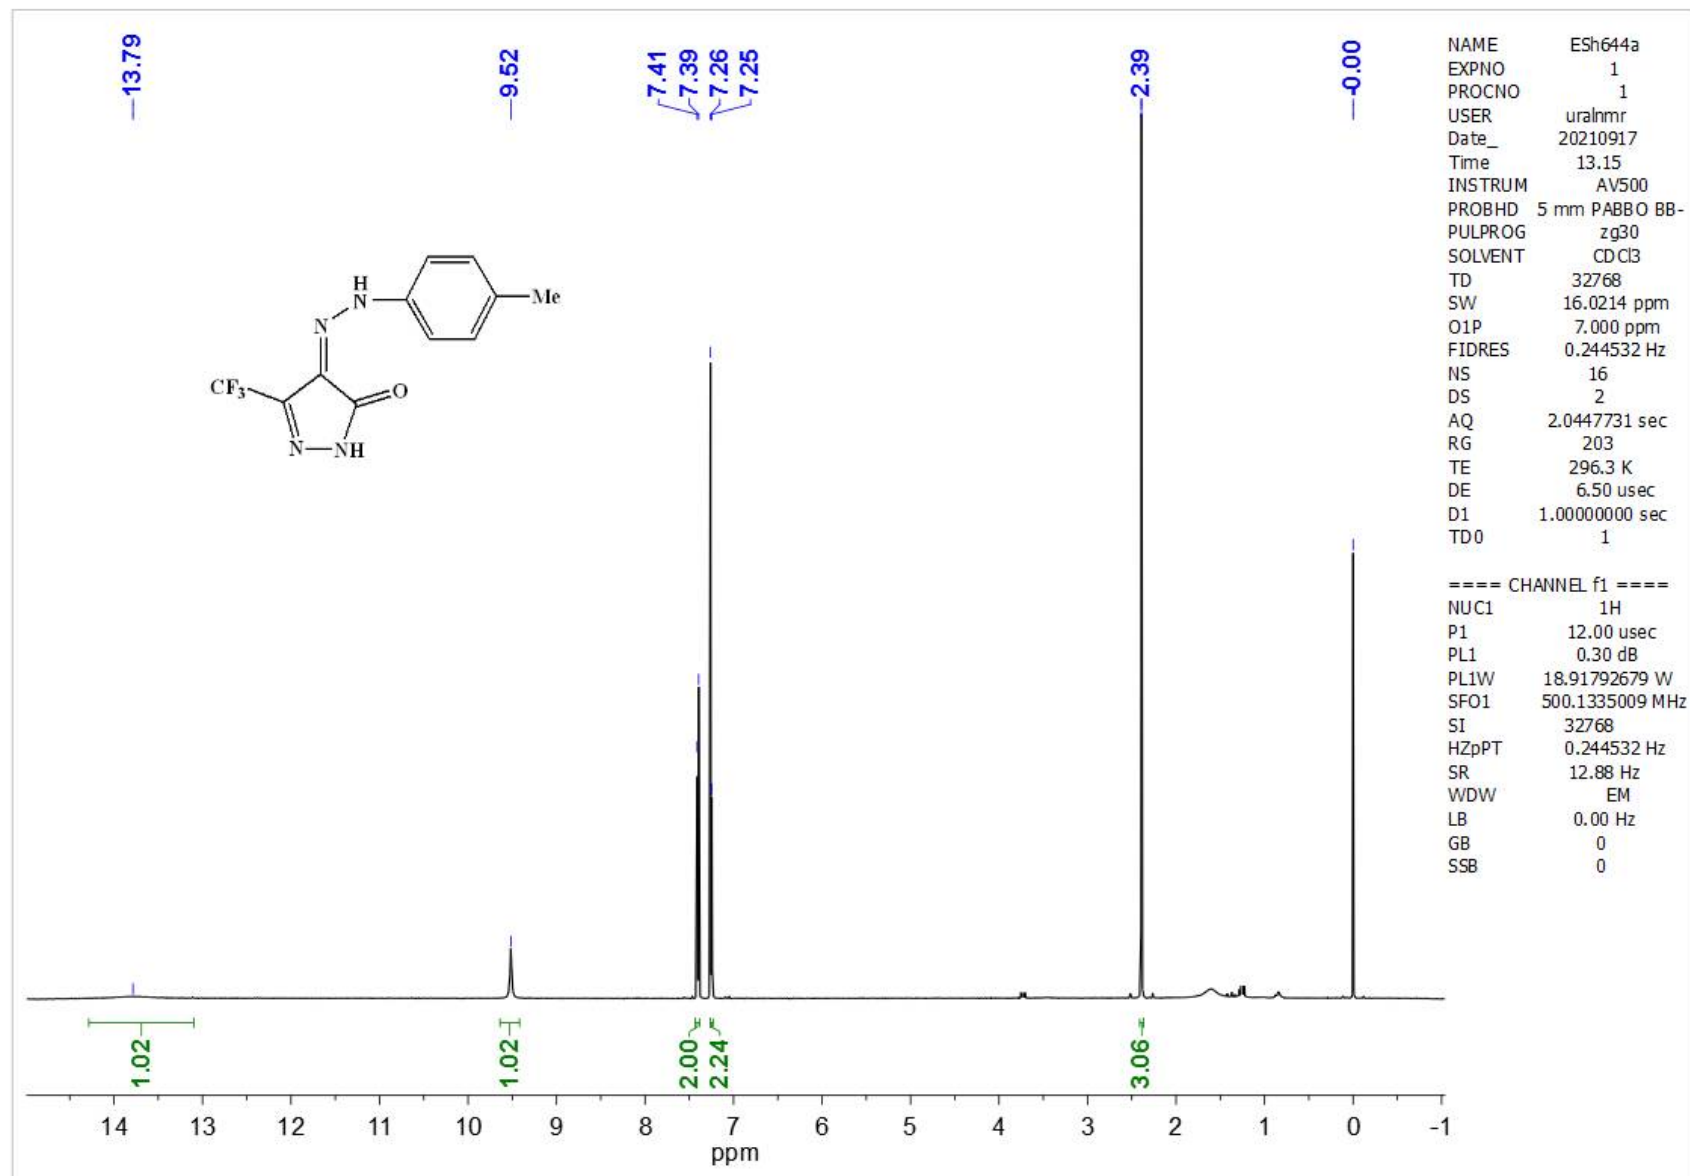

Figure S7.  $^{19}\text{F}$  NMR spectrum of compound **5b**

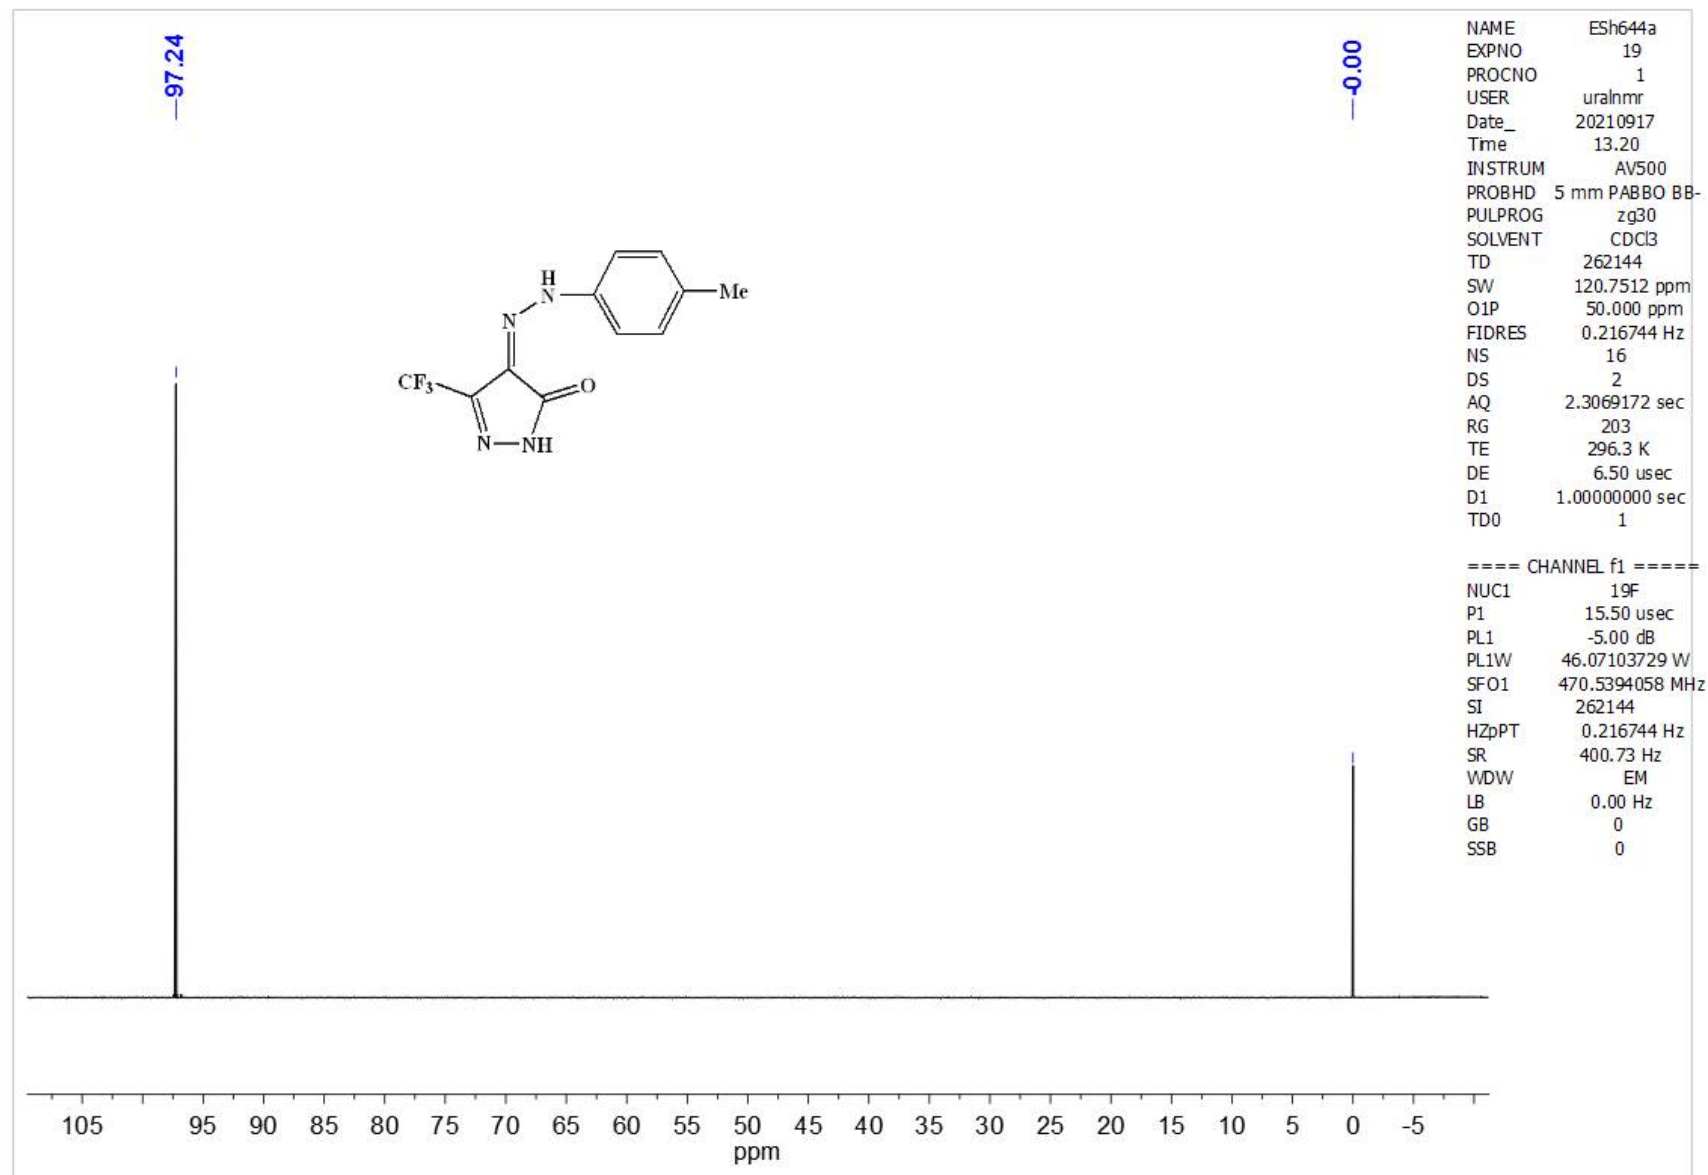

Figure S8. <sup>1</sup>H NMR spectrum of compound 5c

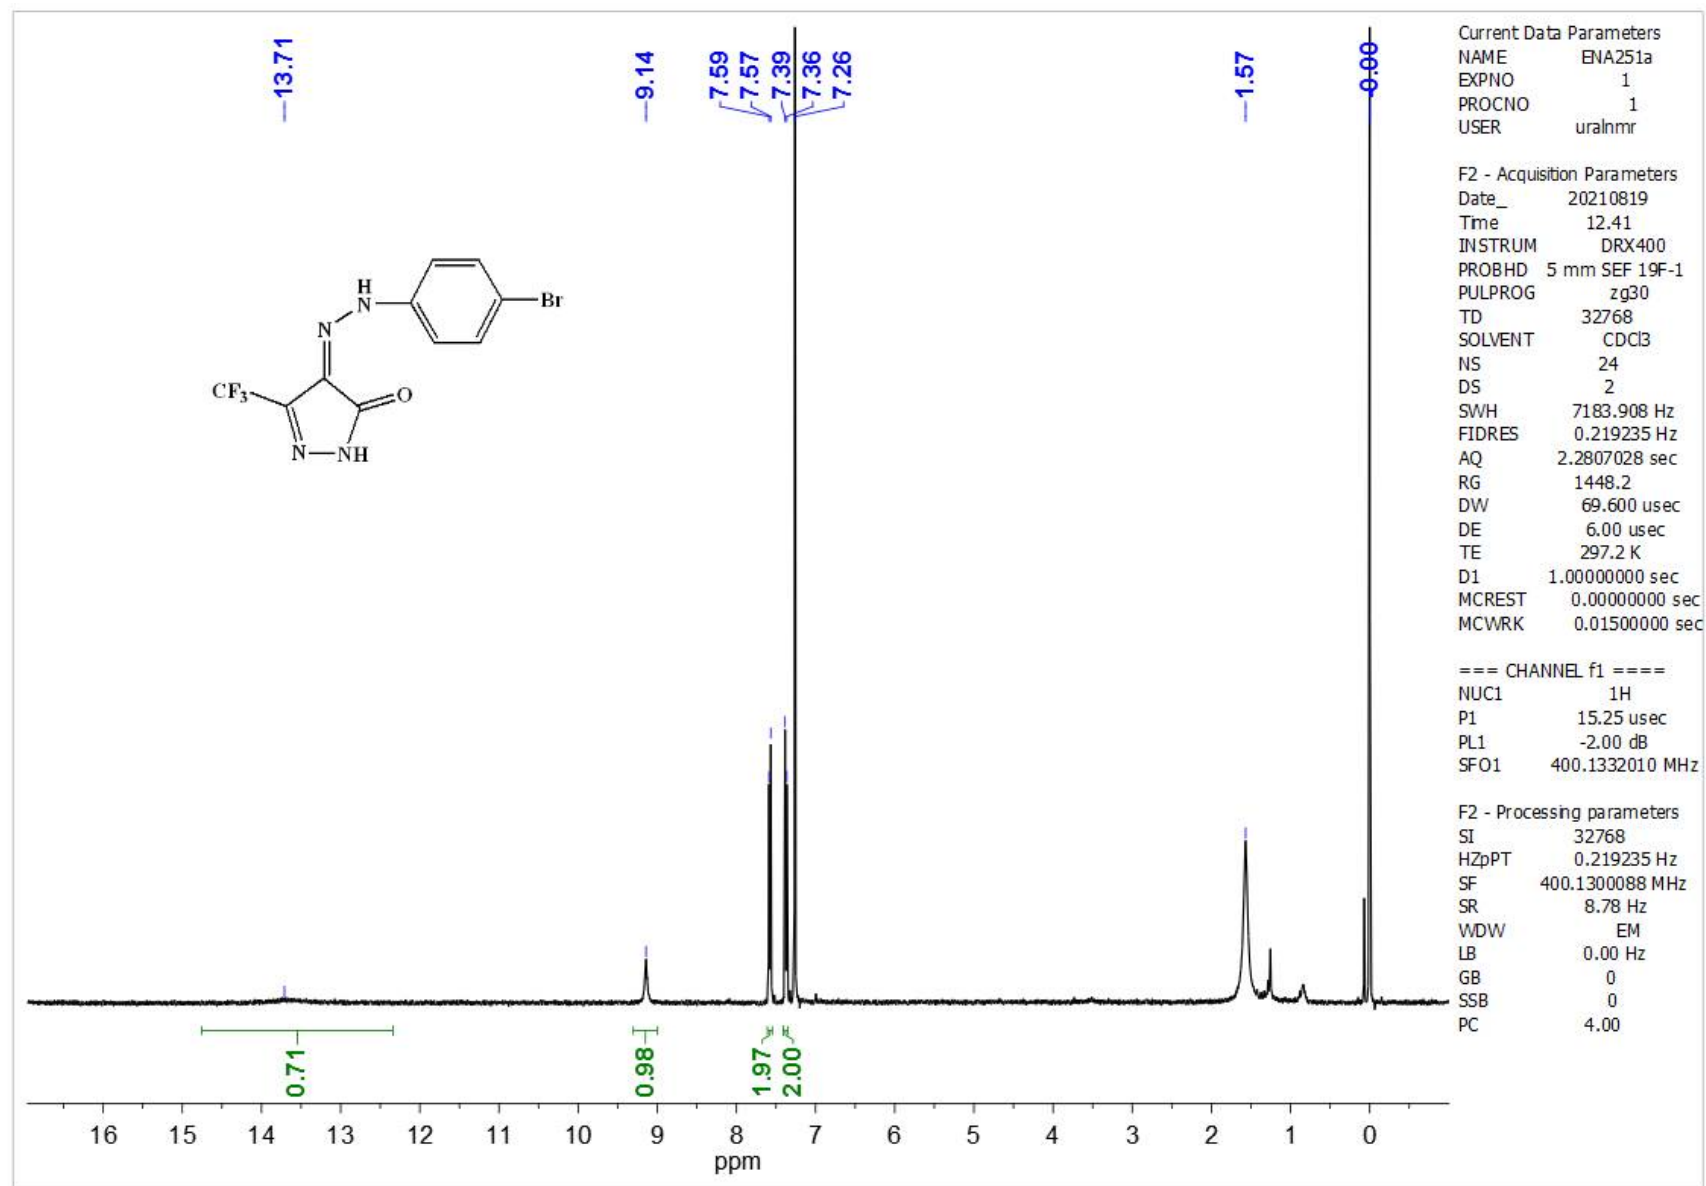

Figure S9.  $^{13}\text{C}$  NMR spectrum of compound 5c

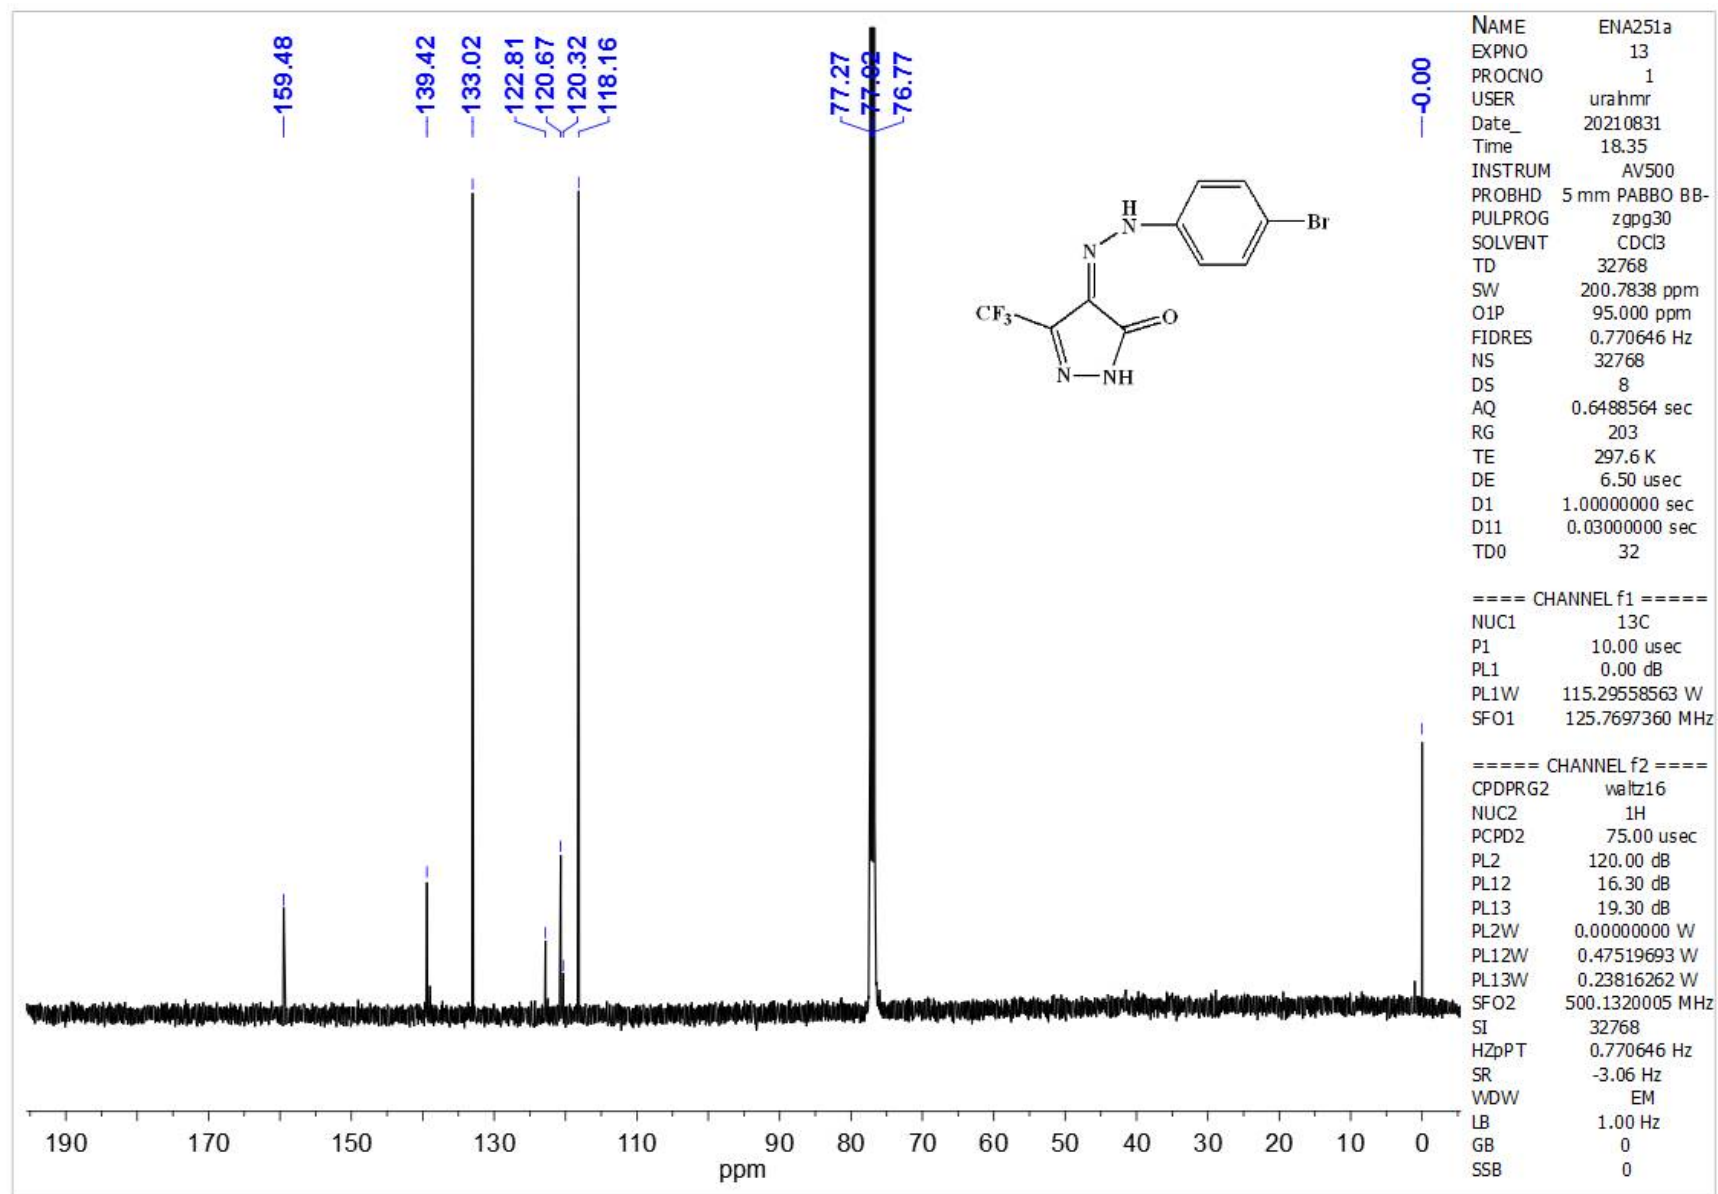

Figure S10.  $^{19}\text{F}$  NMR spectrum of compound **5c**

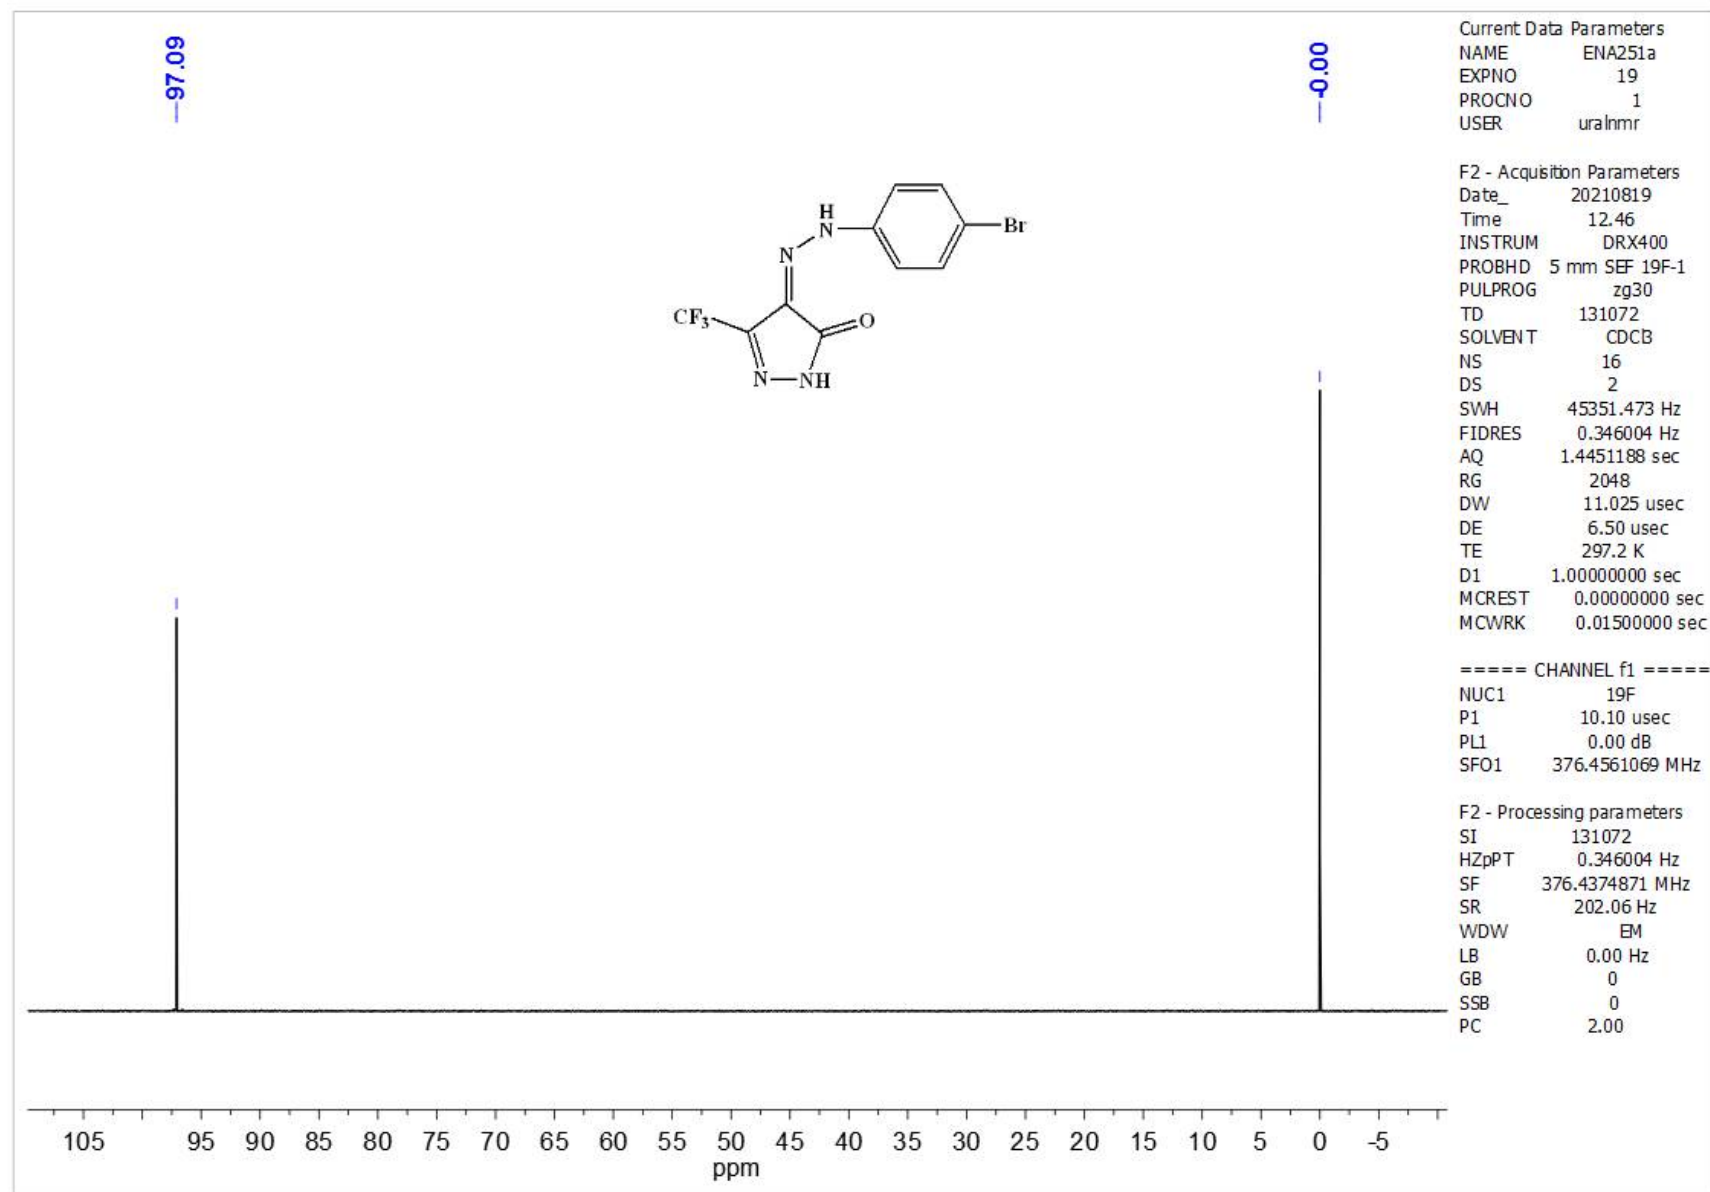

Figure S11. <sup>1</sup>H NMR spectrum of compound **5d**

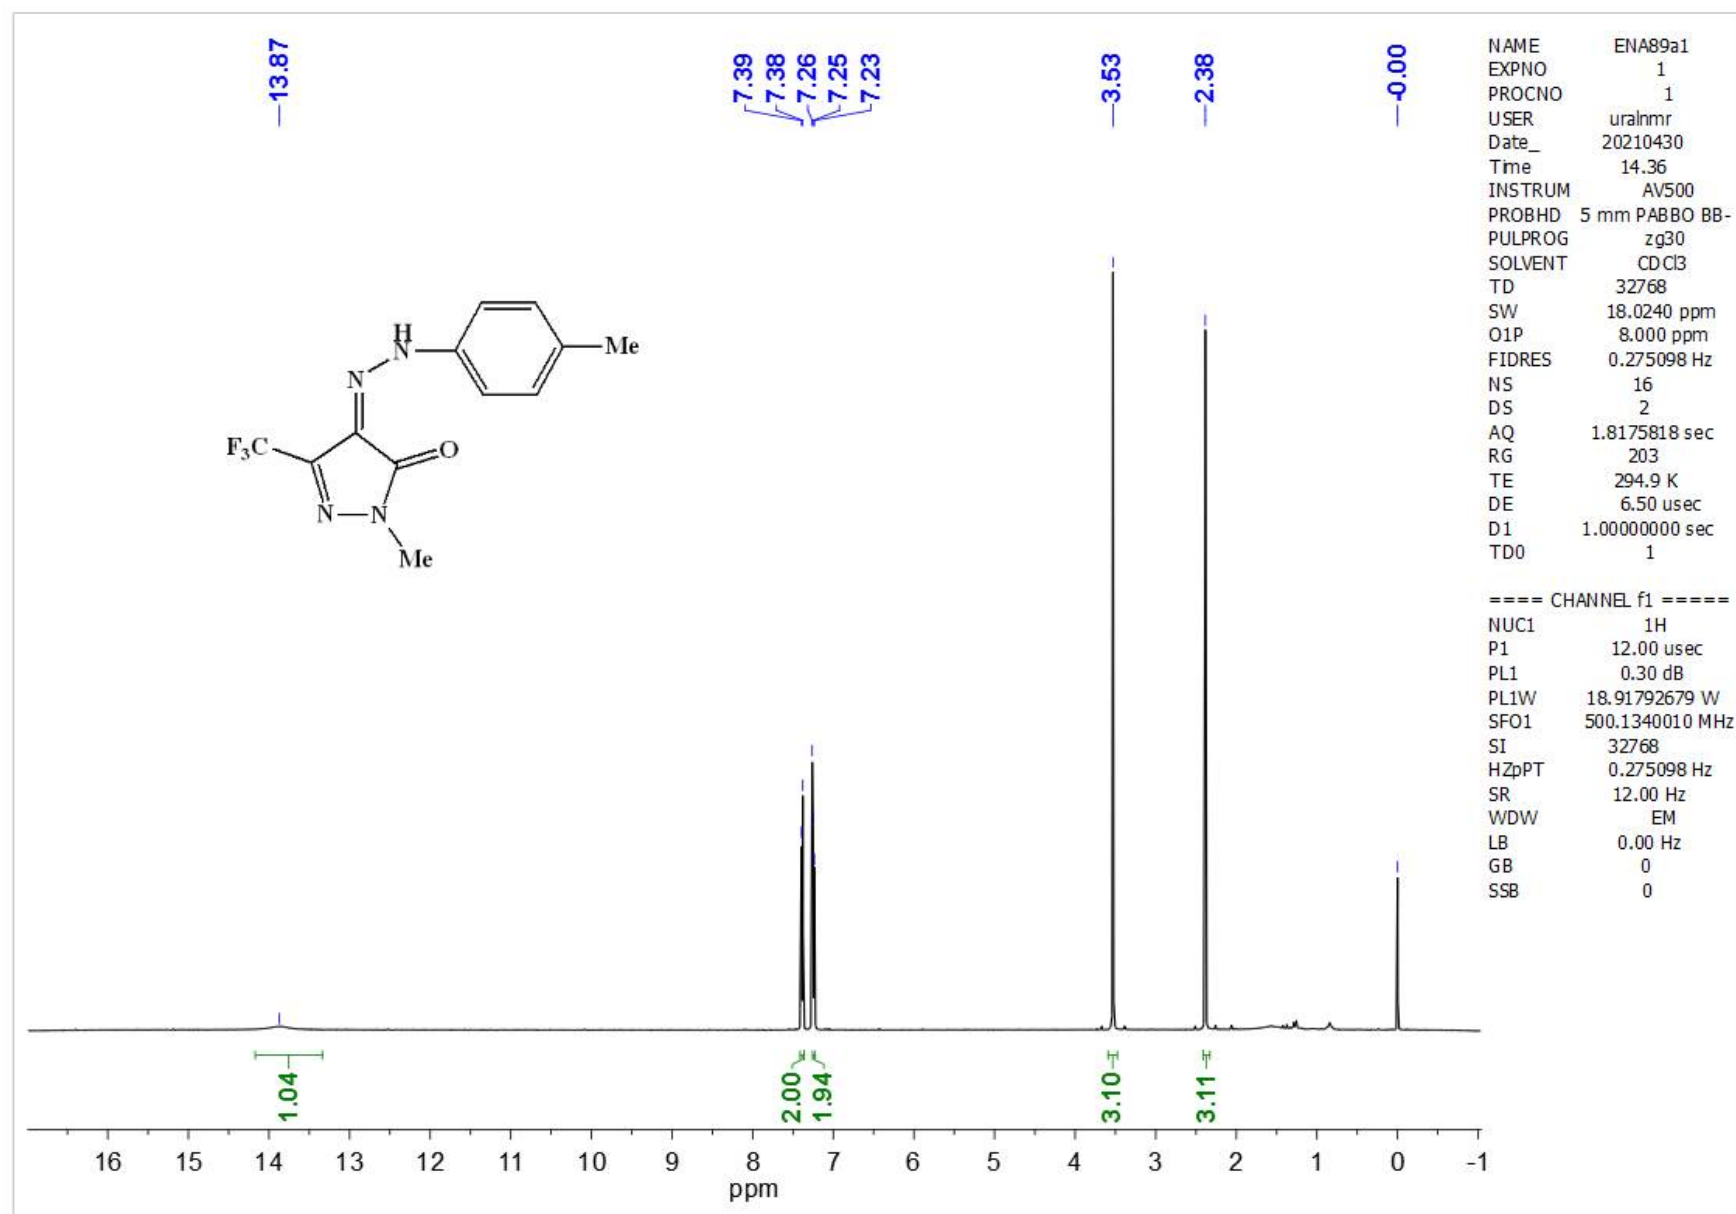

Figure S12.  $^{19}\text{F}$  NMR spectrum of compound **5d**

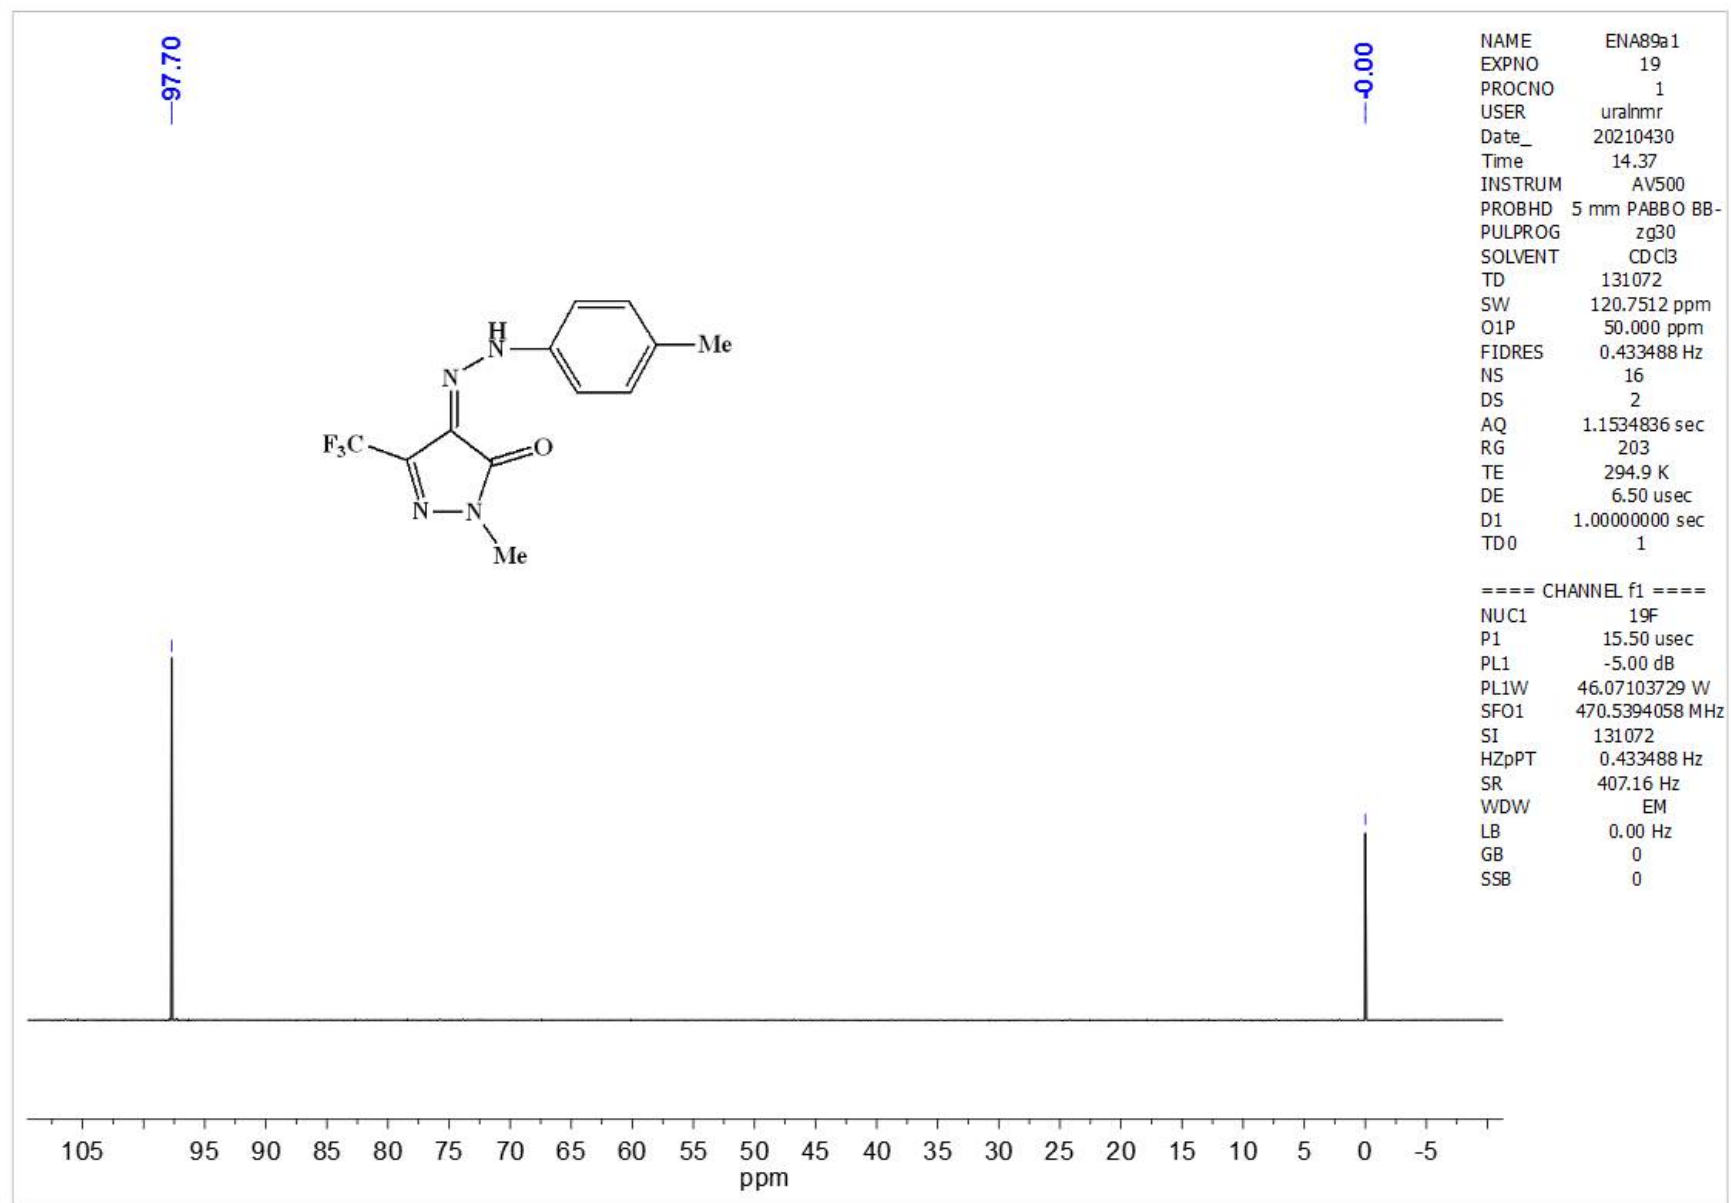

Figure S13. <sup>1</sup>H NMR spectrum of compound 5e

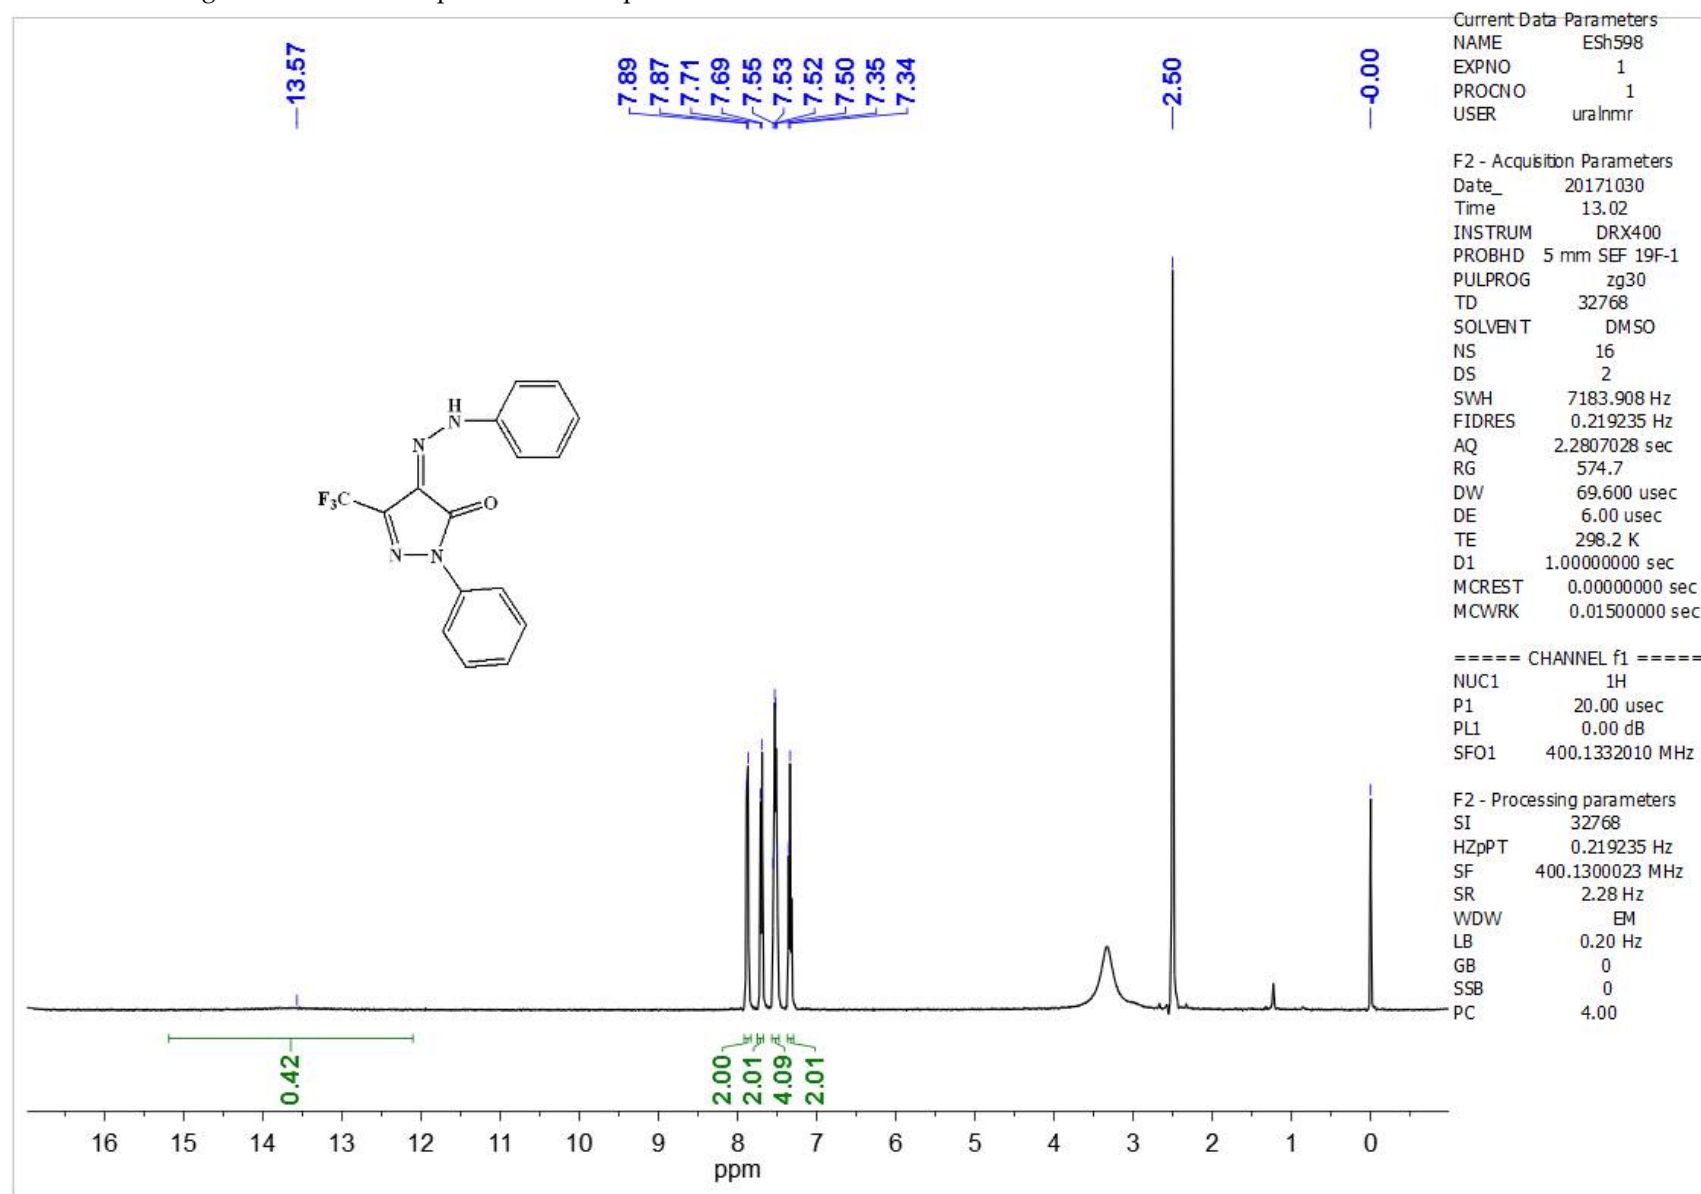



Figure S14.  $^{19}\text{F}$  NMR spectrum of compound **5e**

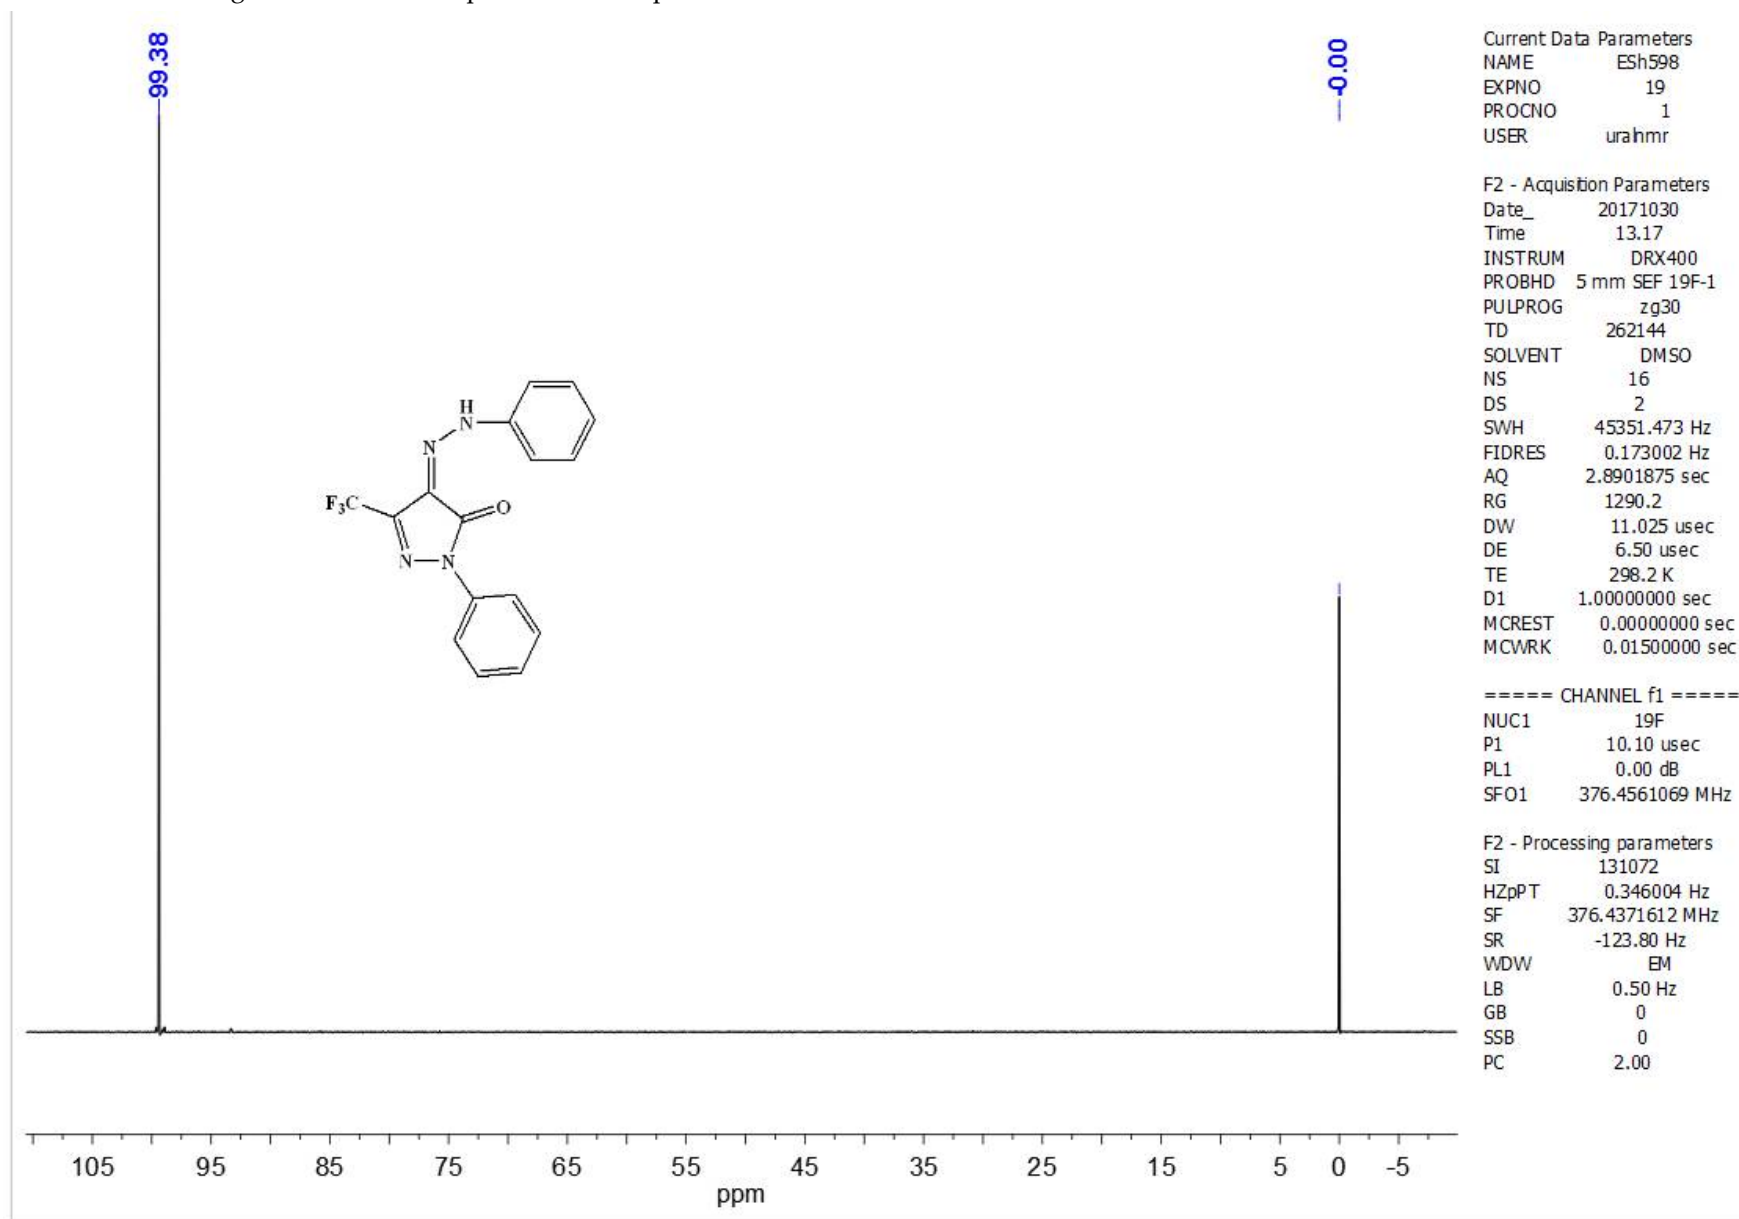

Figure S15. <sup>1</sup>H NMR spectrum of compound 5f

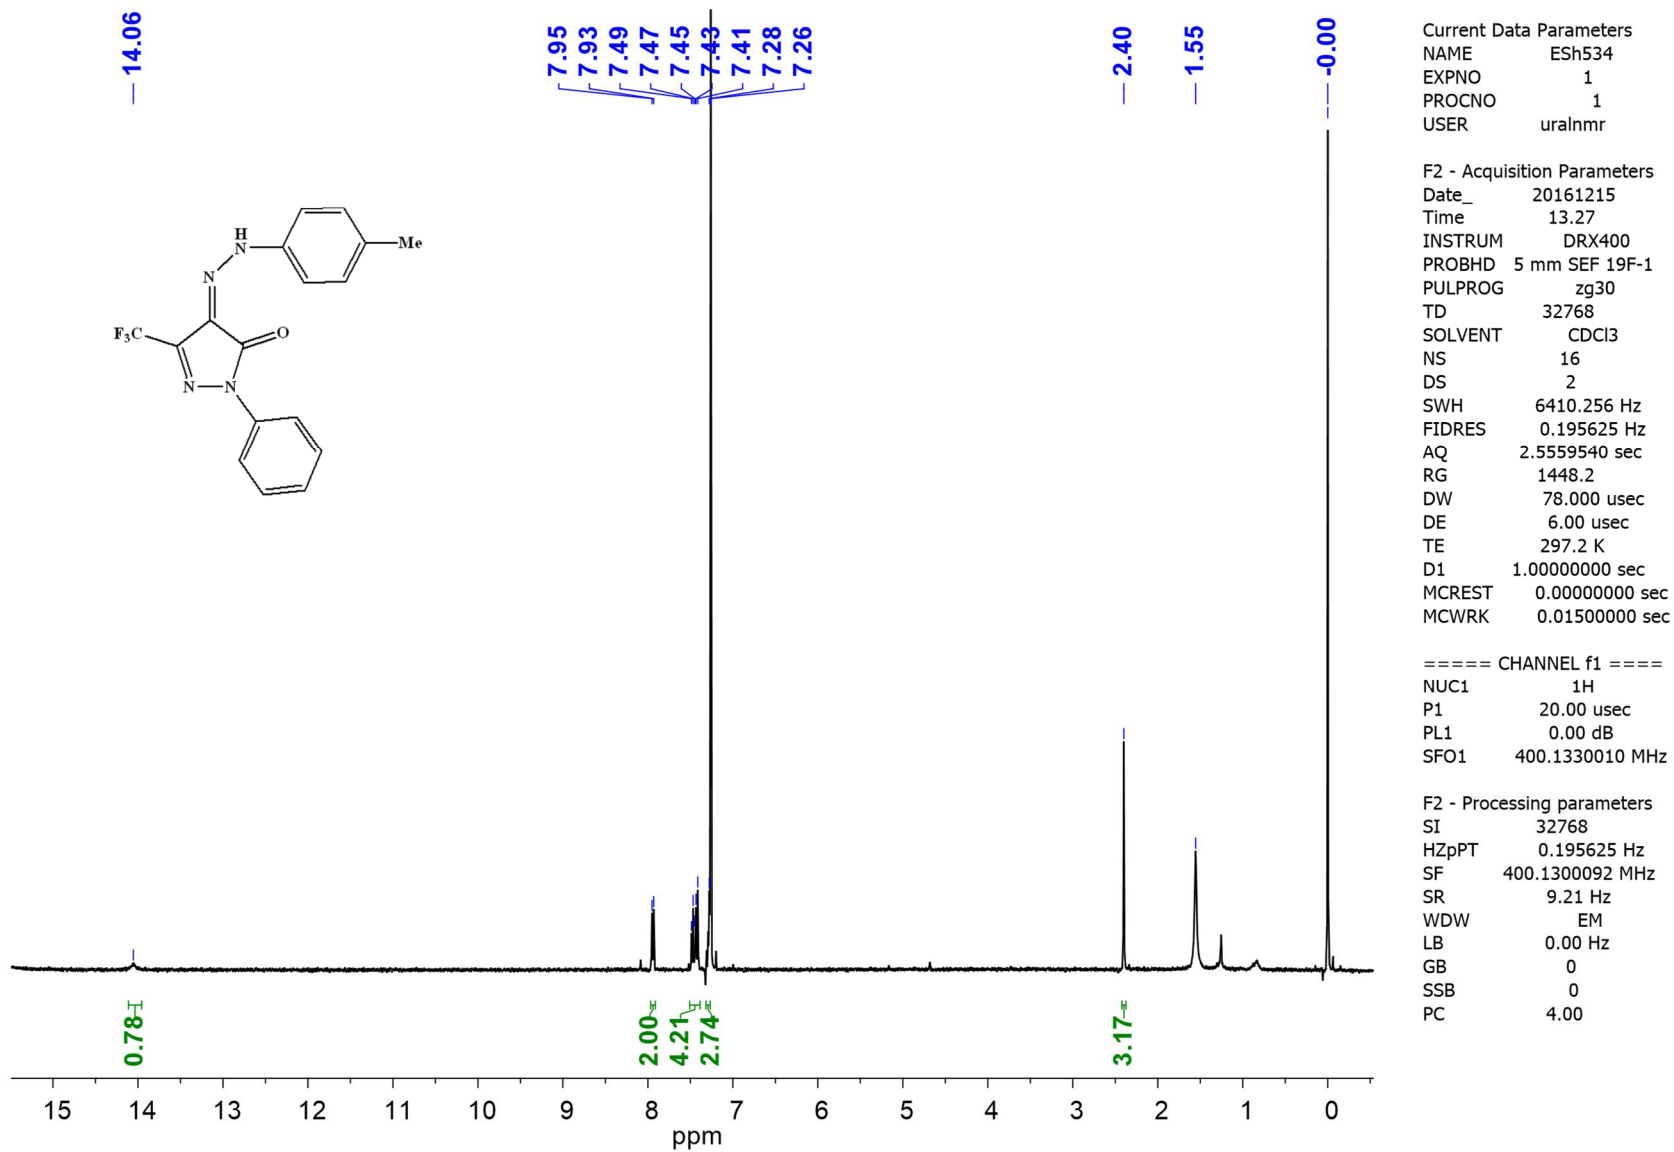

Figure S16.  $^{13}\text{C}$  NMR spectrum of compound **5f**

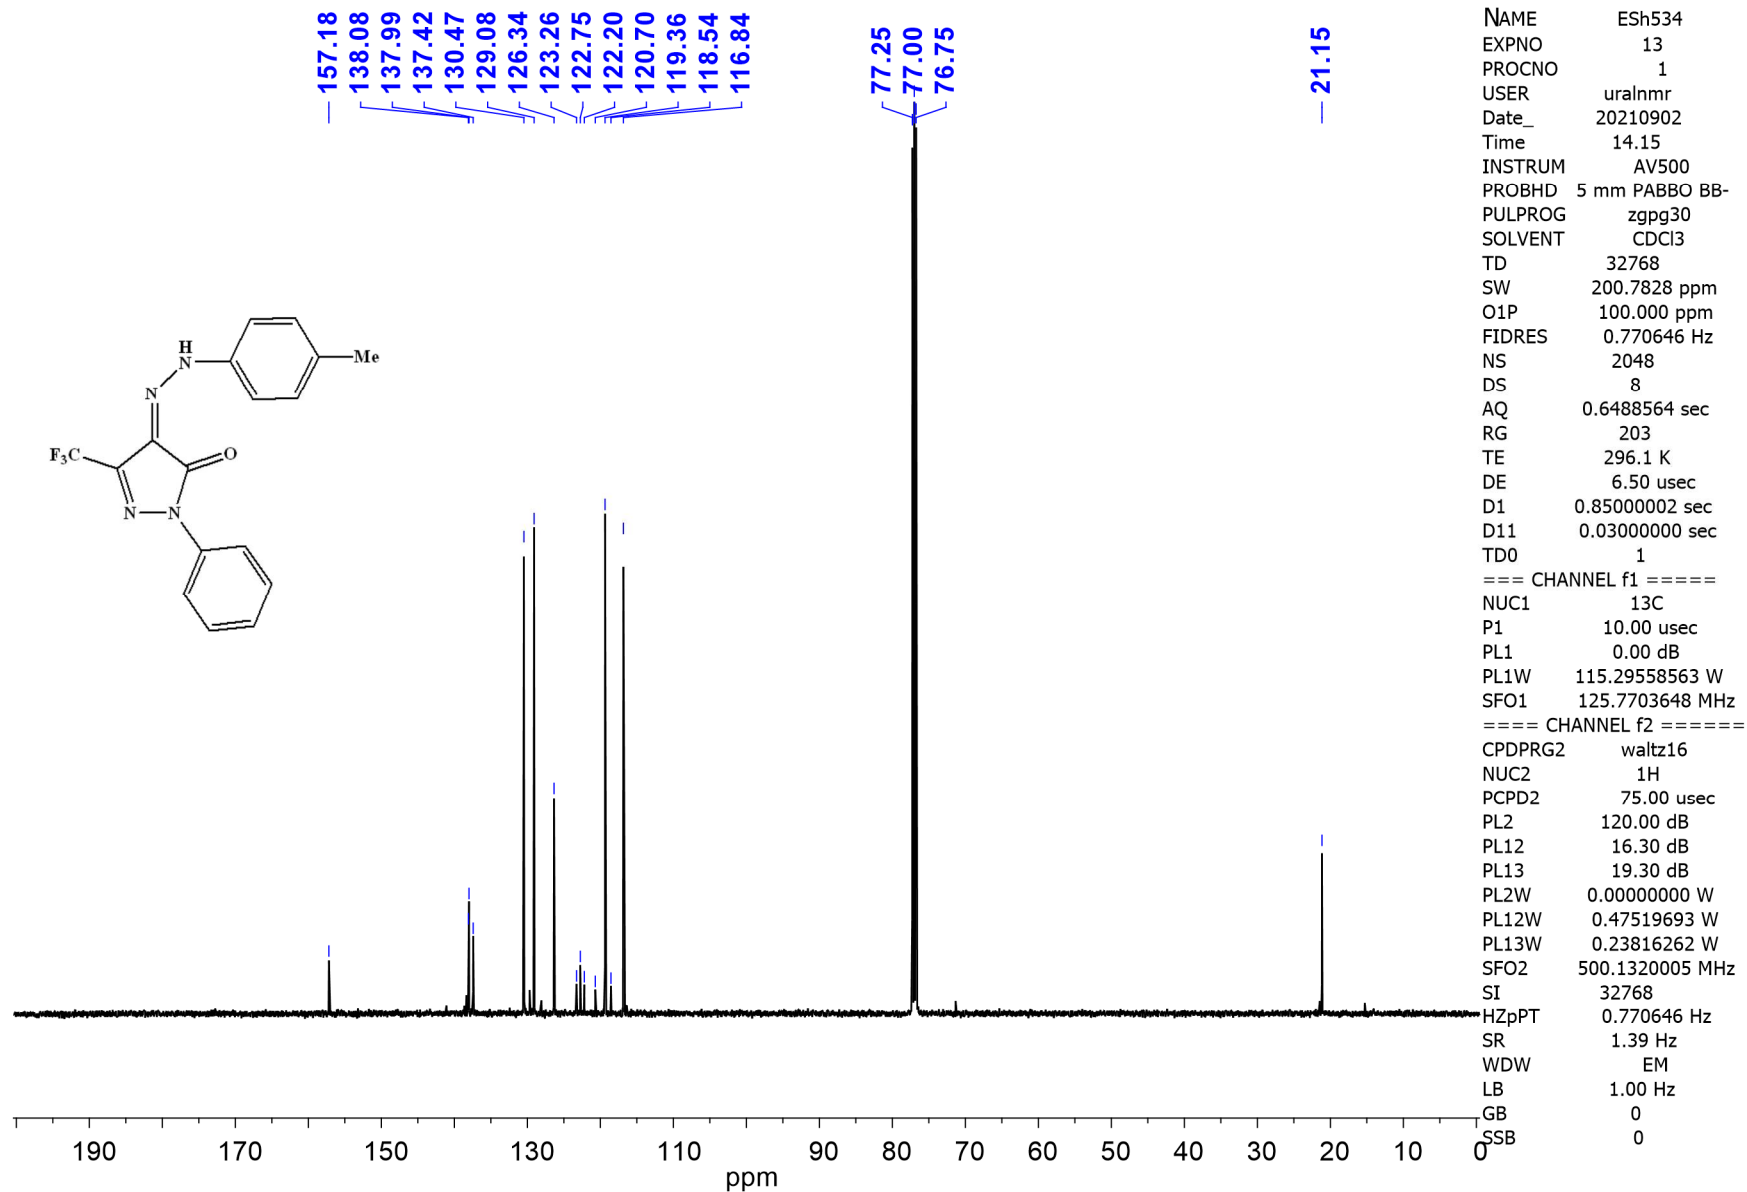

Figure S17.  $^{19}\text{F}$  NMR spectrum of compound **5f**

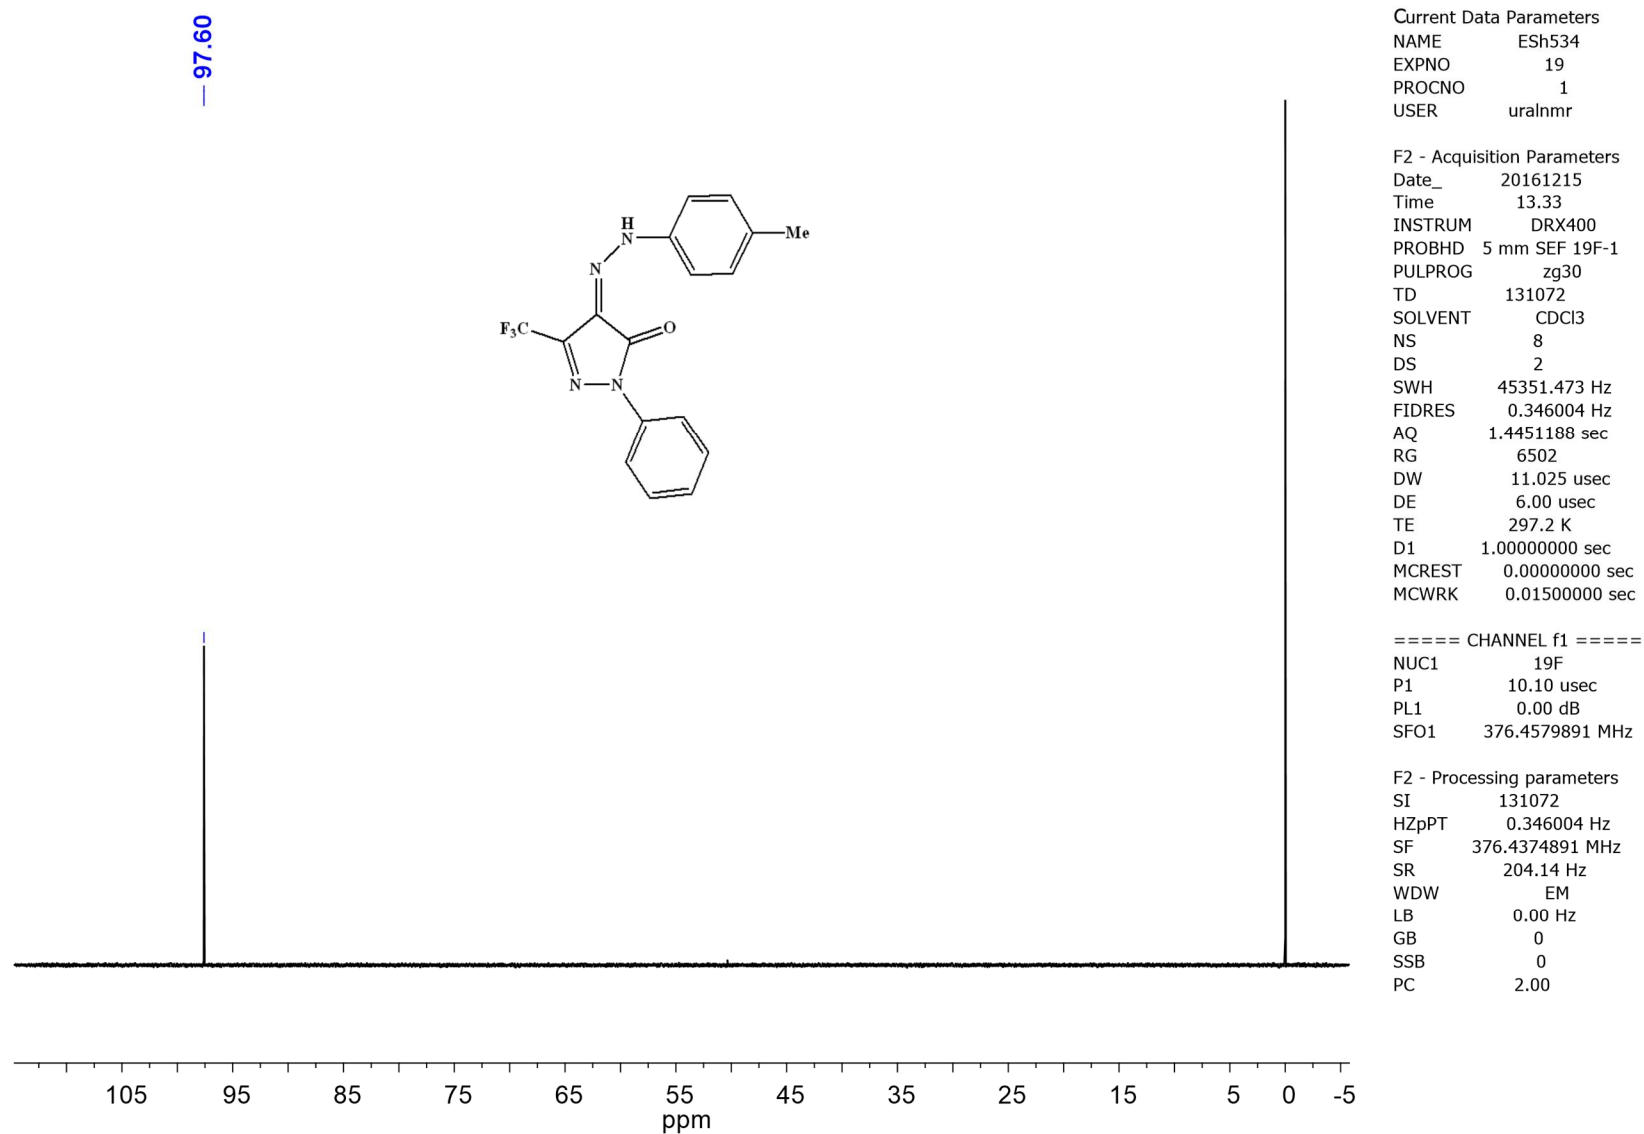

Figure S18. <sup>1</sup>H NMR spectrum of compound 5g

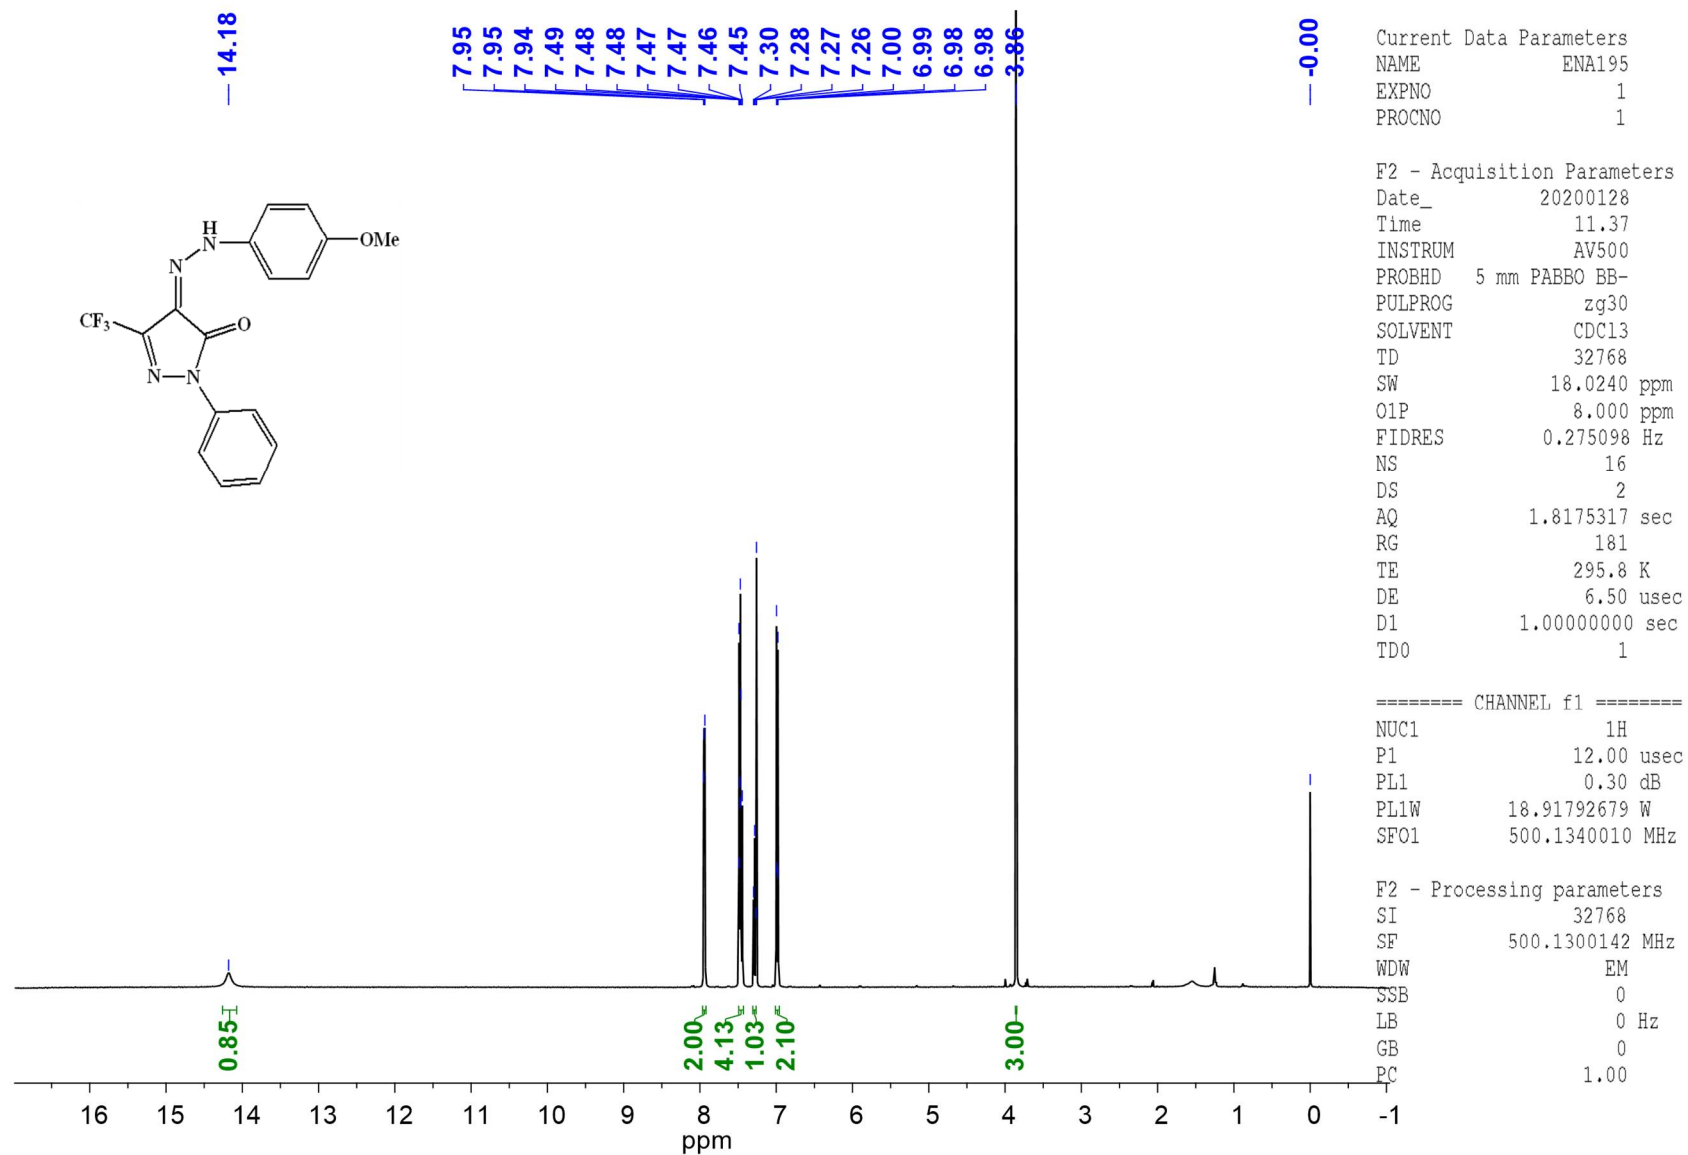

Figure S19.  $^{13}\text{C}$  NMR spectrum of compound 5g

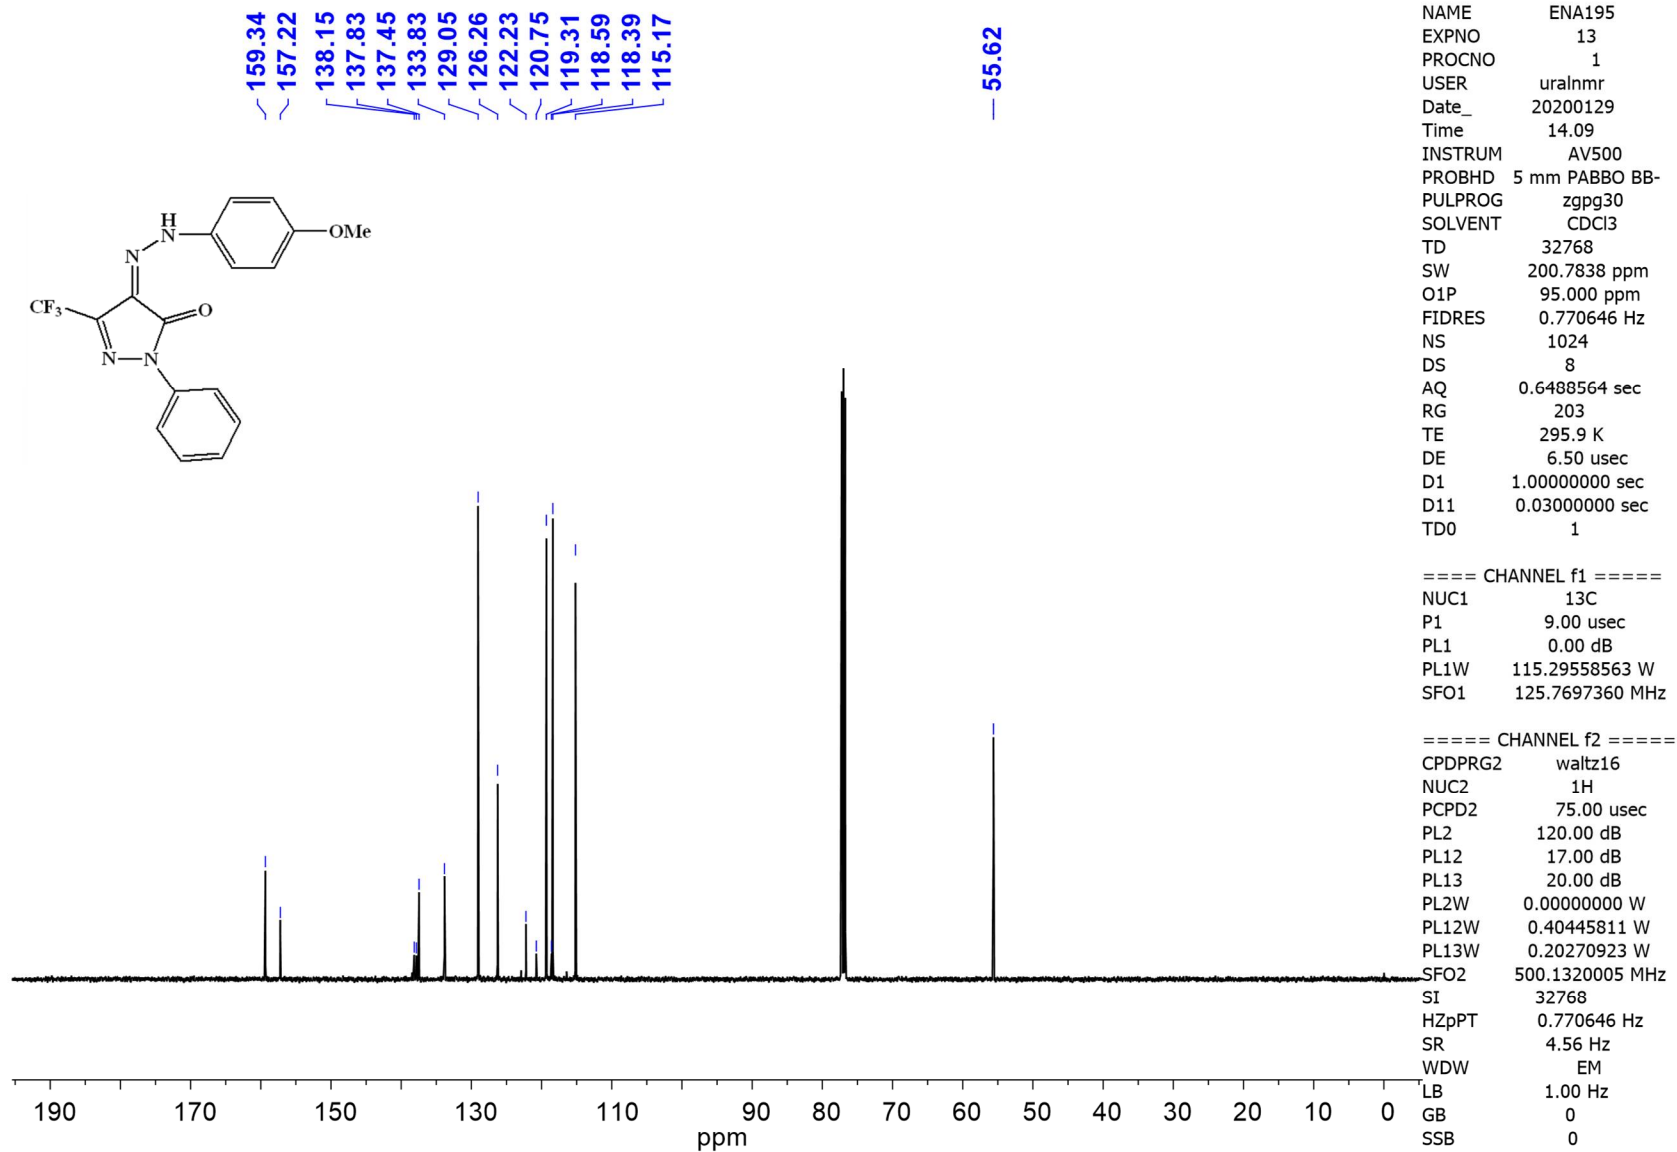

Figure S20.  $^{19}\text{F}$  NMR spectrum of compound **5g**

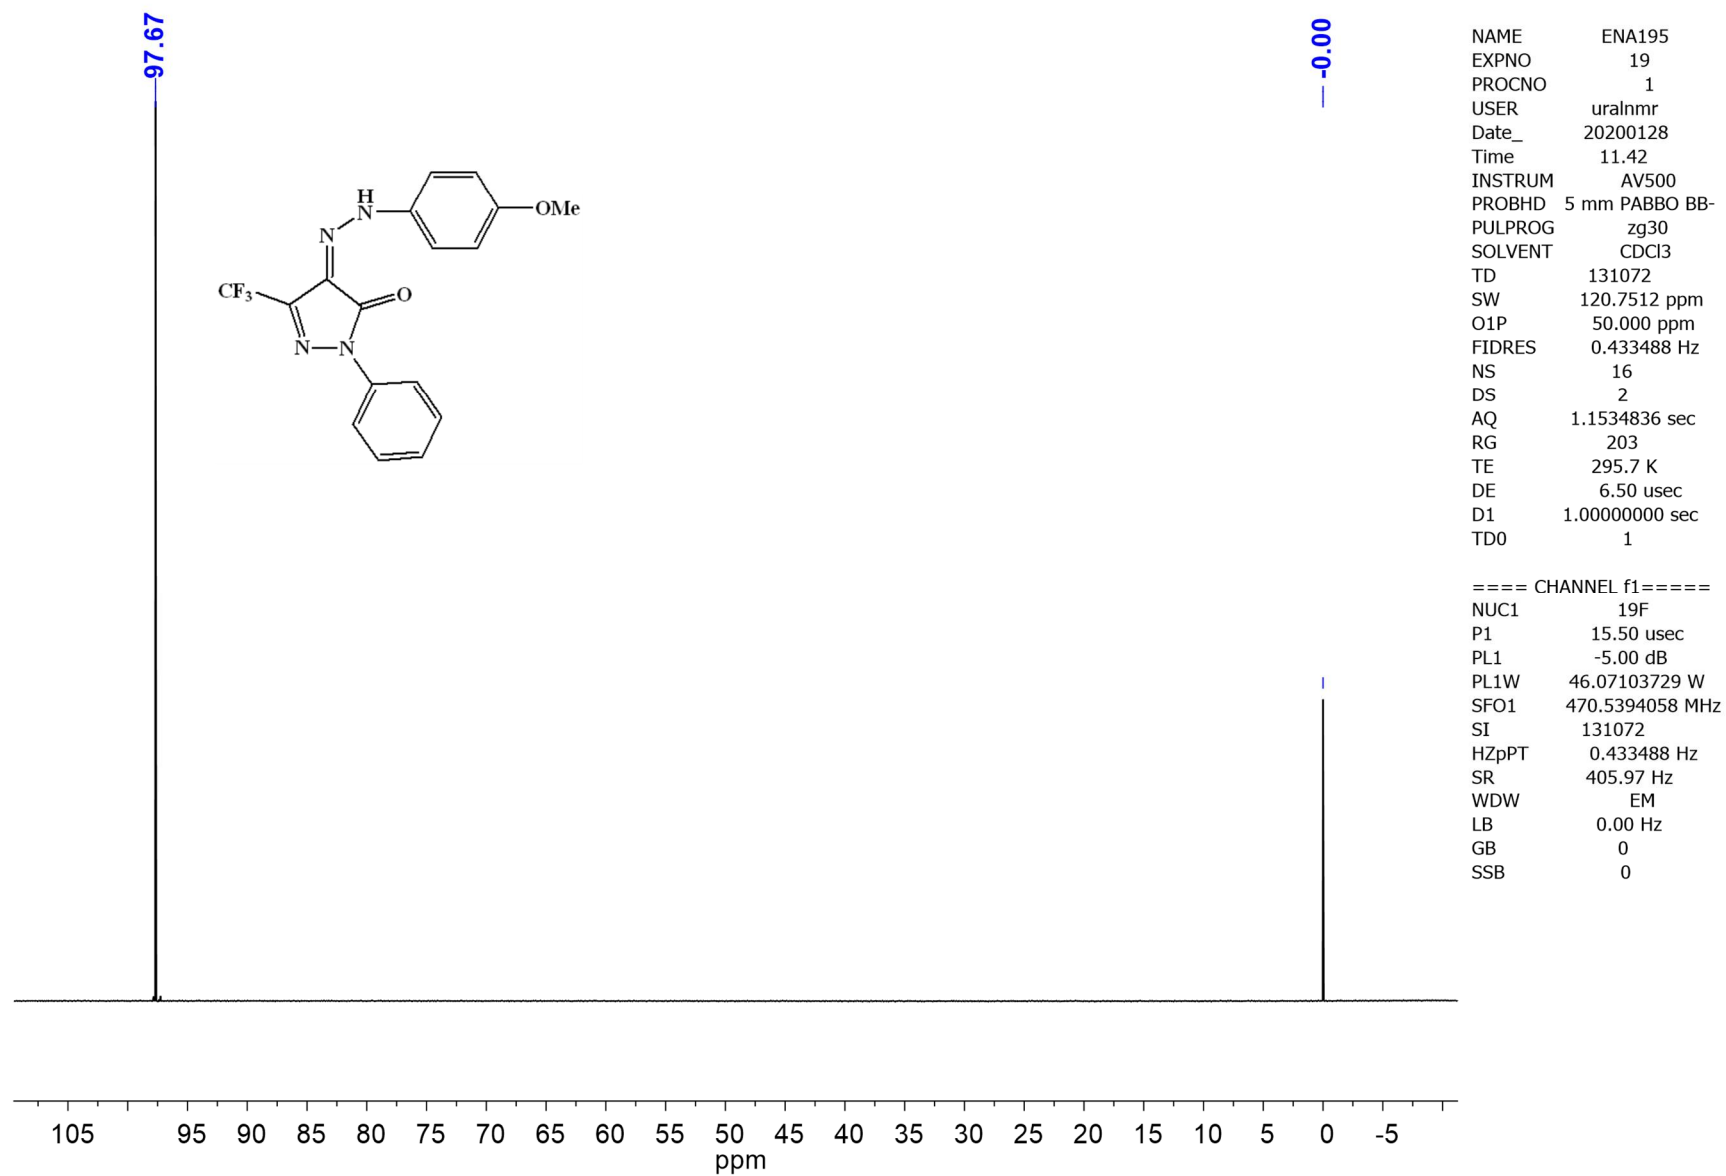

Figure S21. <sup>1</sup>H NMR spectrum of compound **5h**

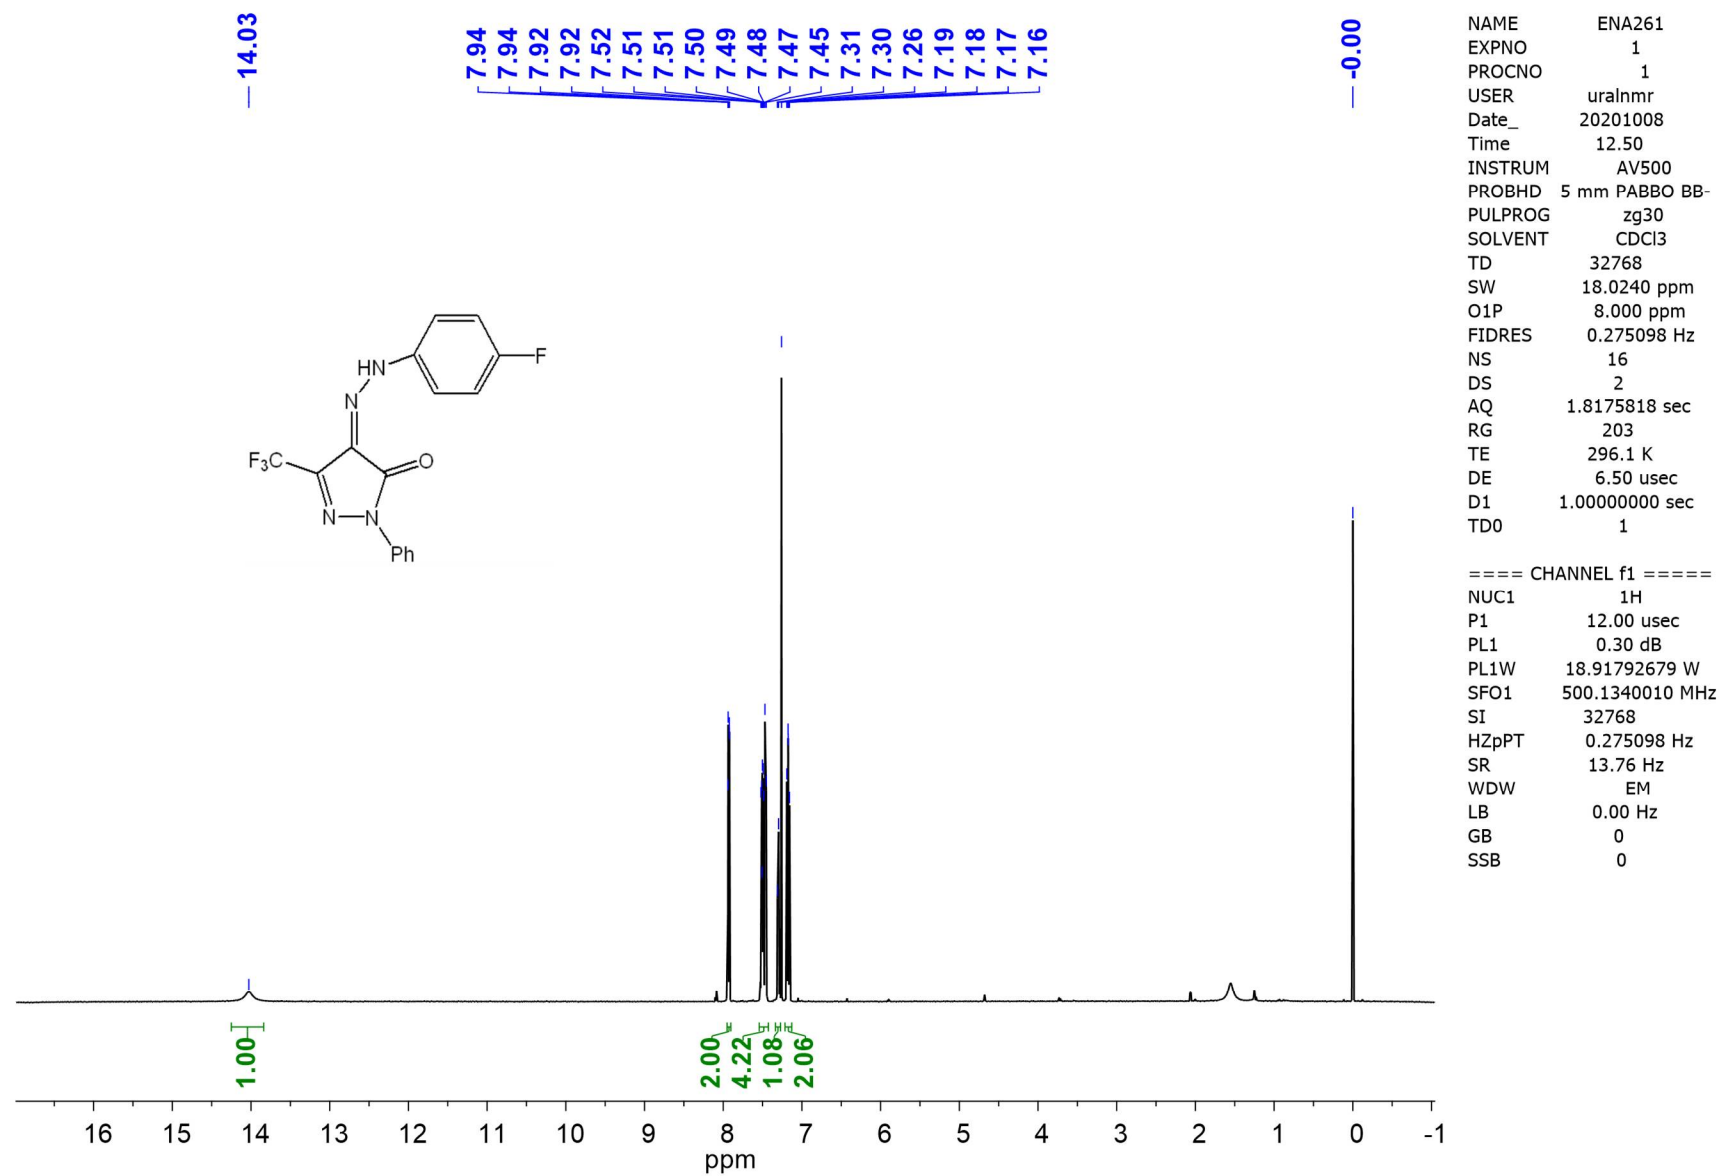



Figure S22. <sup>13</sup>C NMR spectrum of compound **5h**

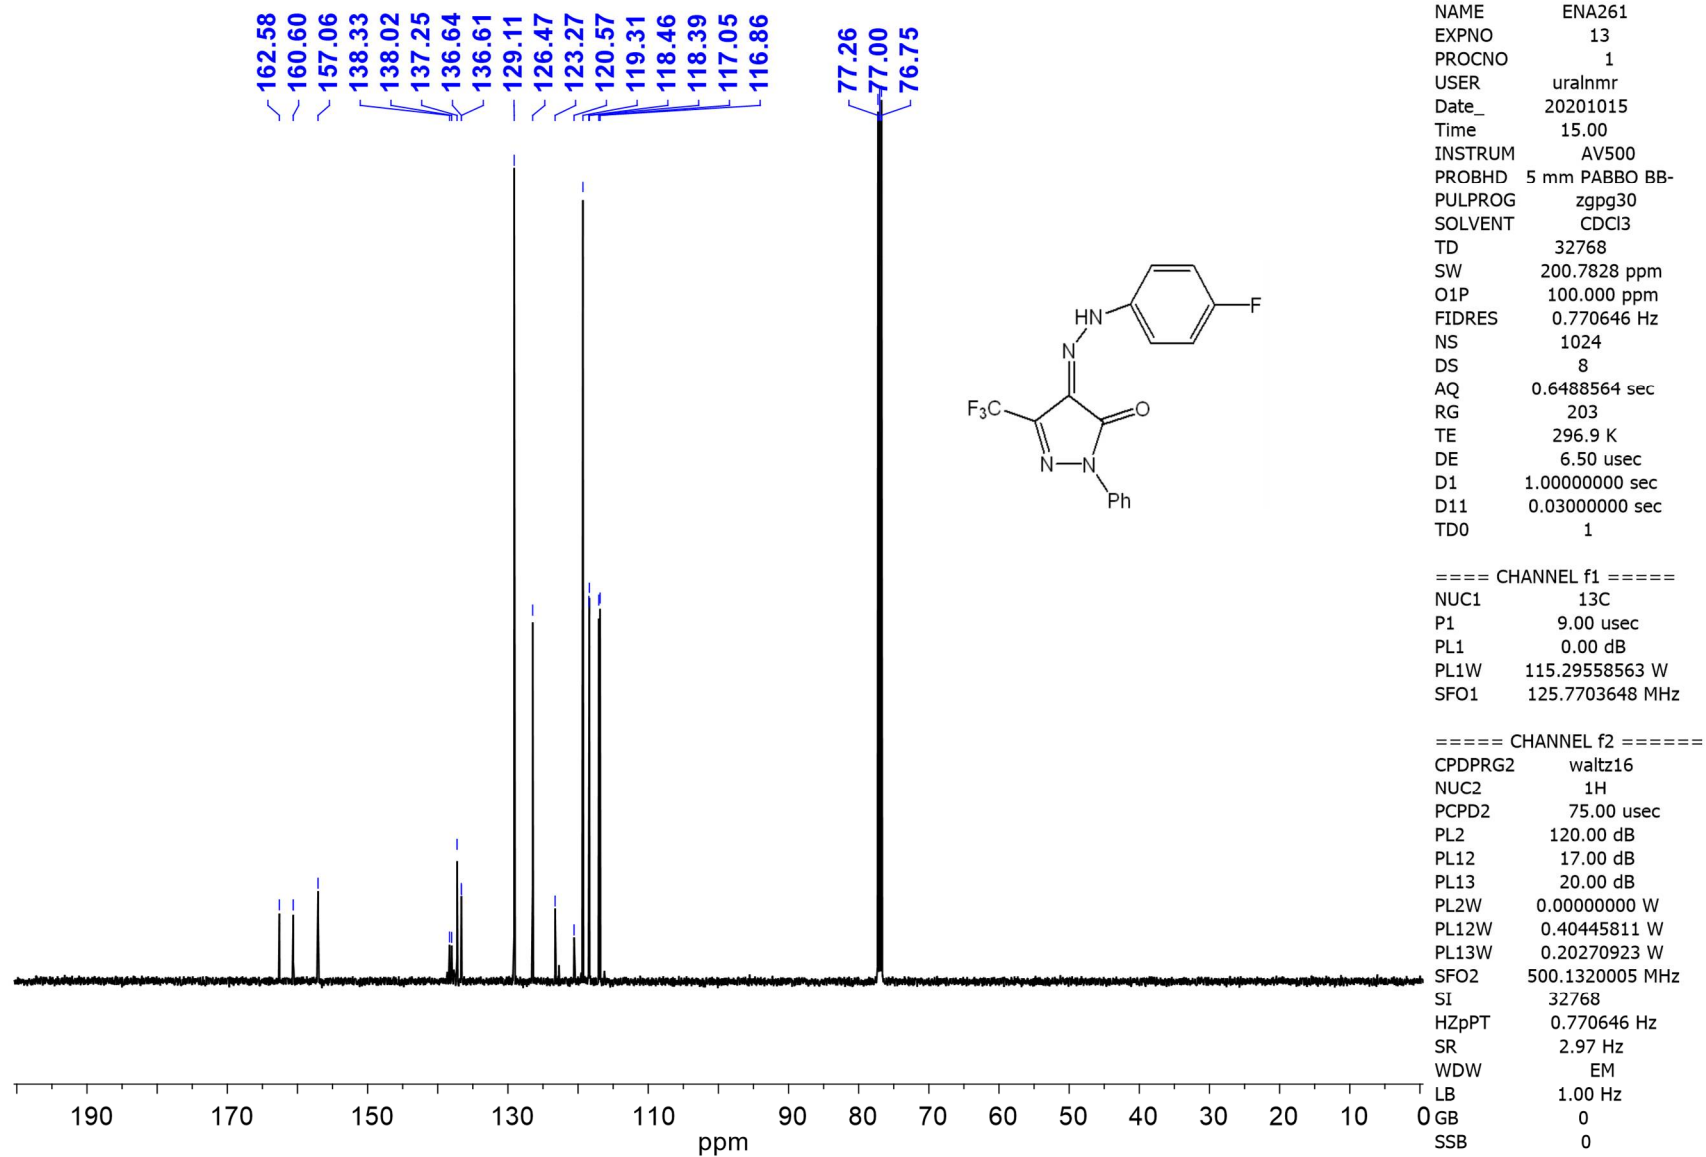

Figure S23.  $^{19}\text{F}$  NMR spectrum of compound **5h**

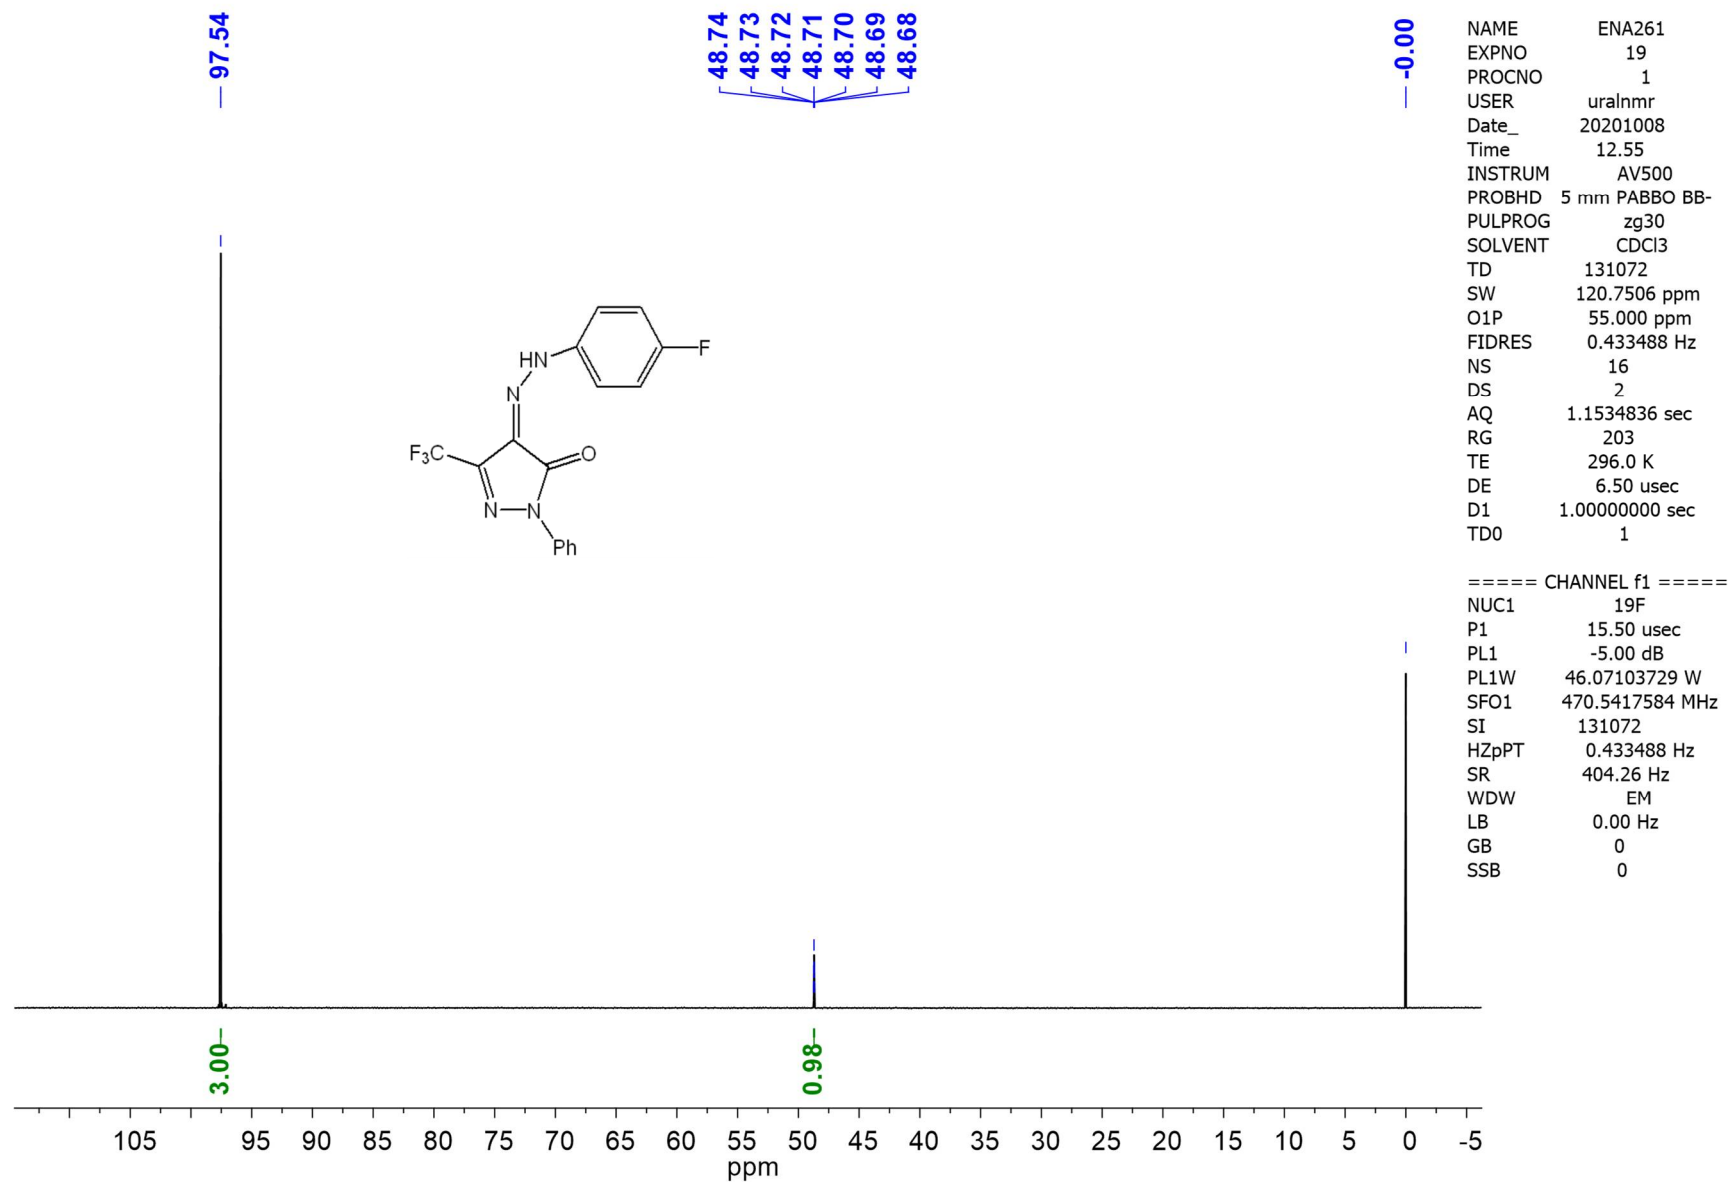

Figure S24. <sup>1</sup>H NMR spectrum of compound **5i**

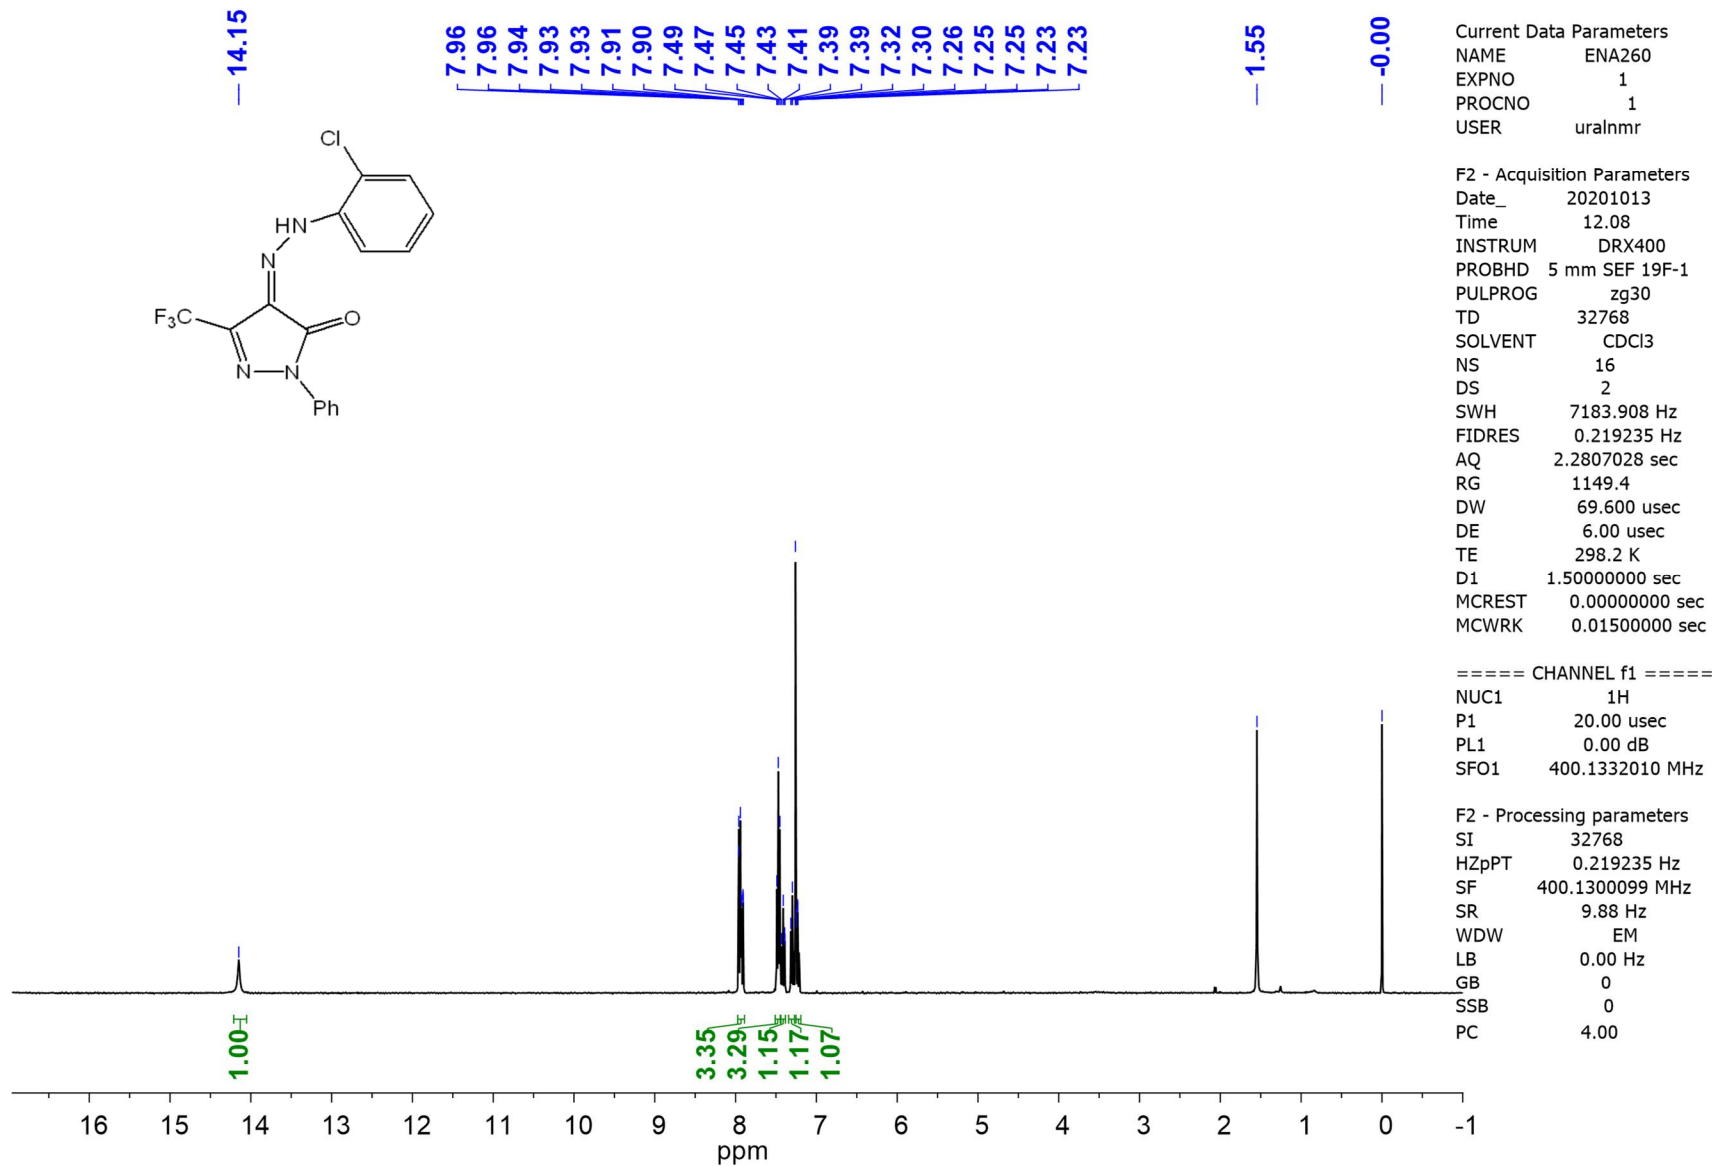

Figure S25.  $^{13}\text{C}$  NMR spectrum of compound **5i**

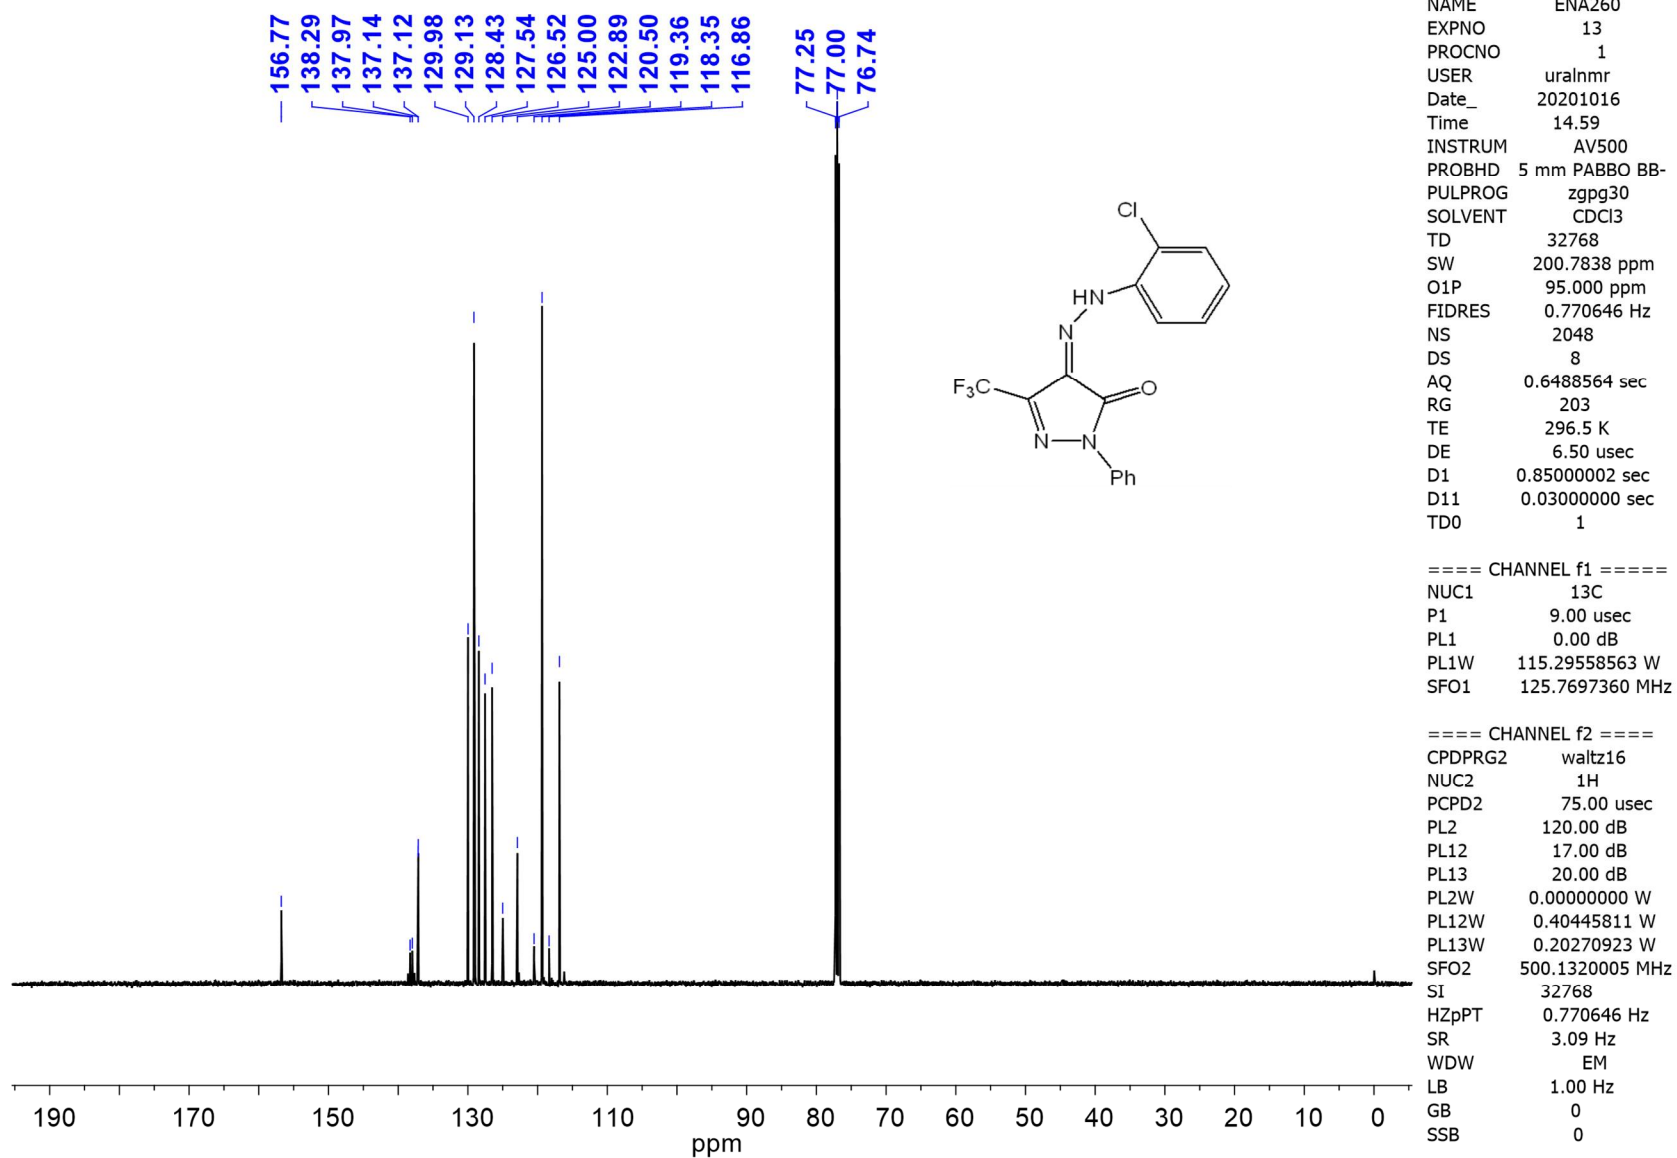

Figure S26.  $^{19}\text{F}$  NMR spectrum of compound **5i**

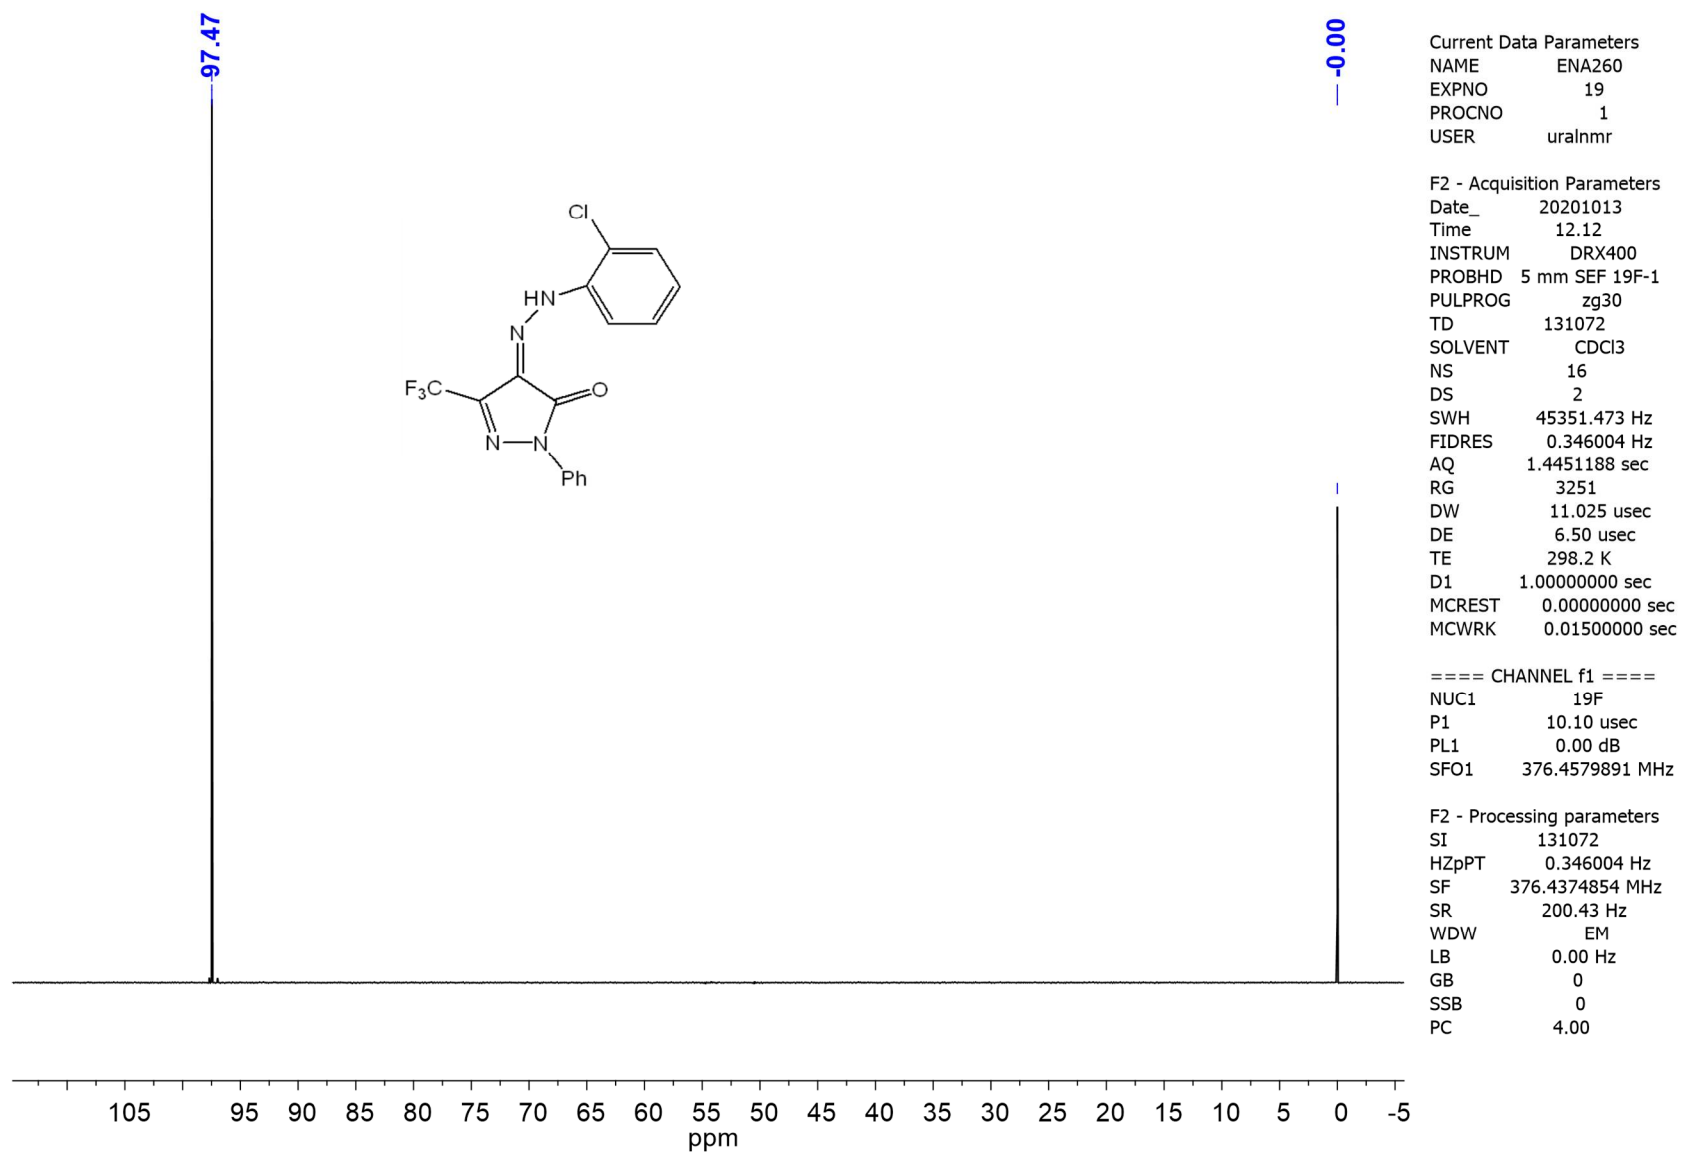

Figure S27. <sup>1</sup>H NMR spectrum of compound 5j

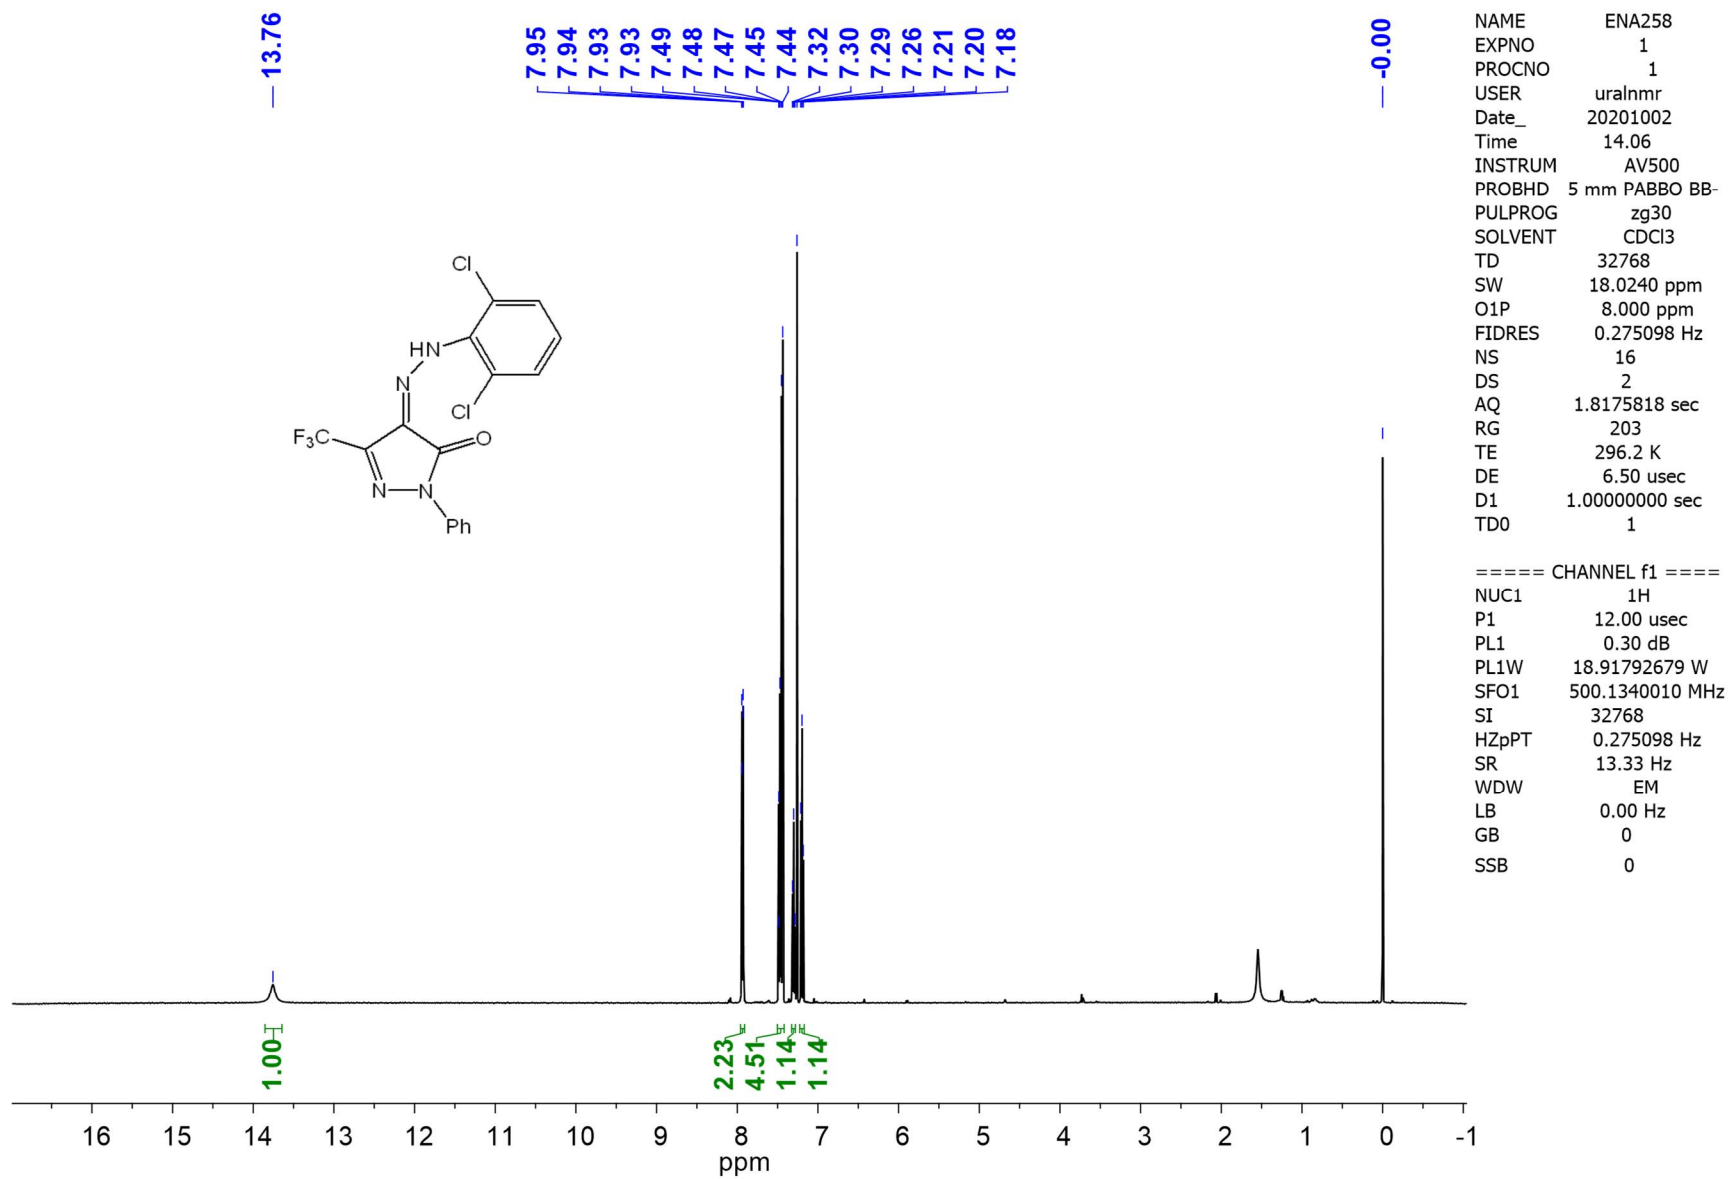

Figure S28.  $^{13}\text{C}$  NMR spectrum of compound **5j**

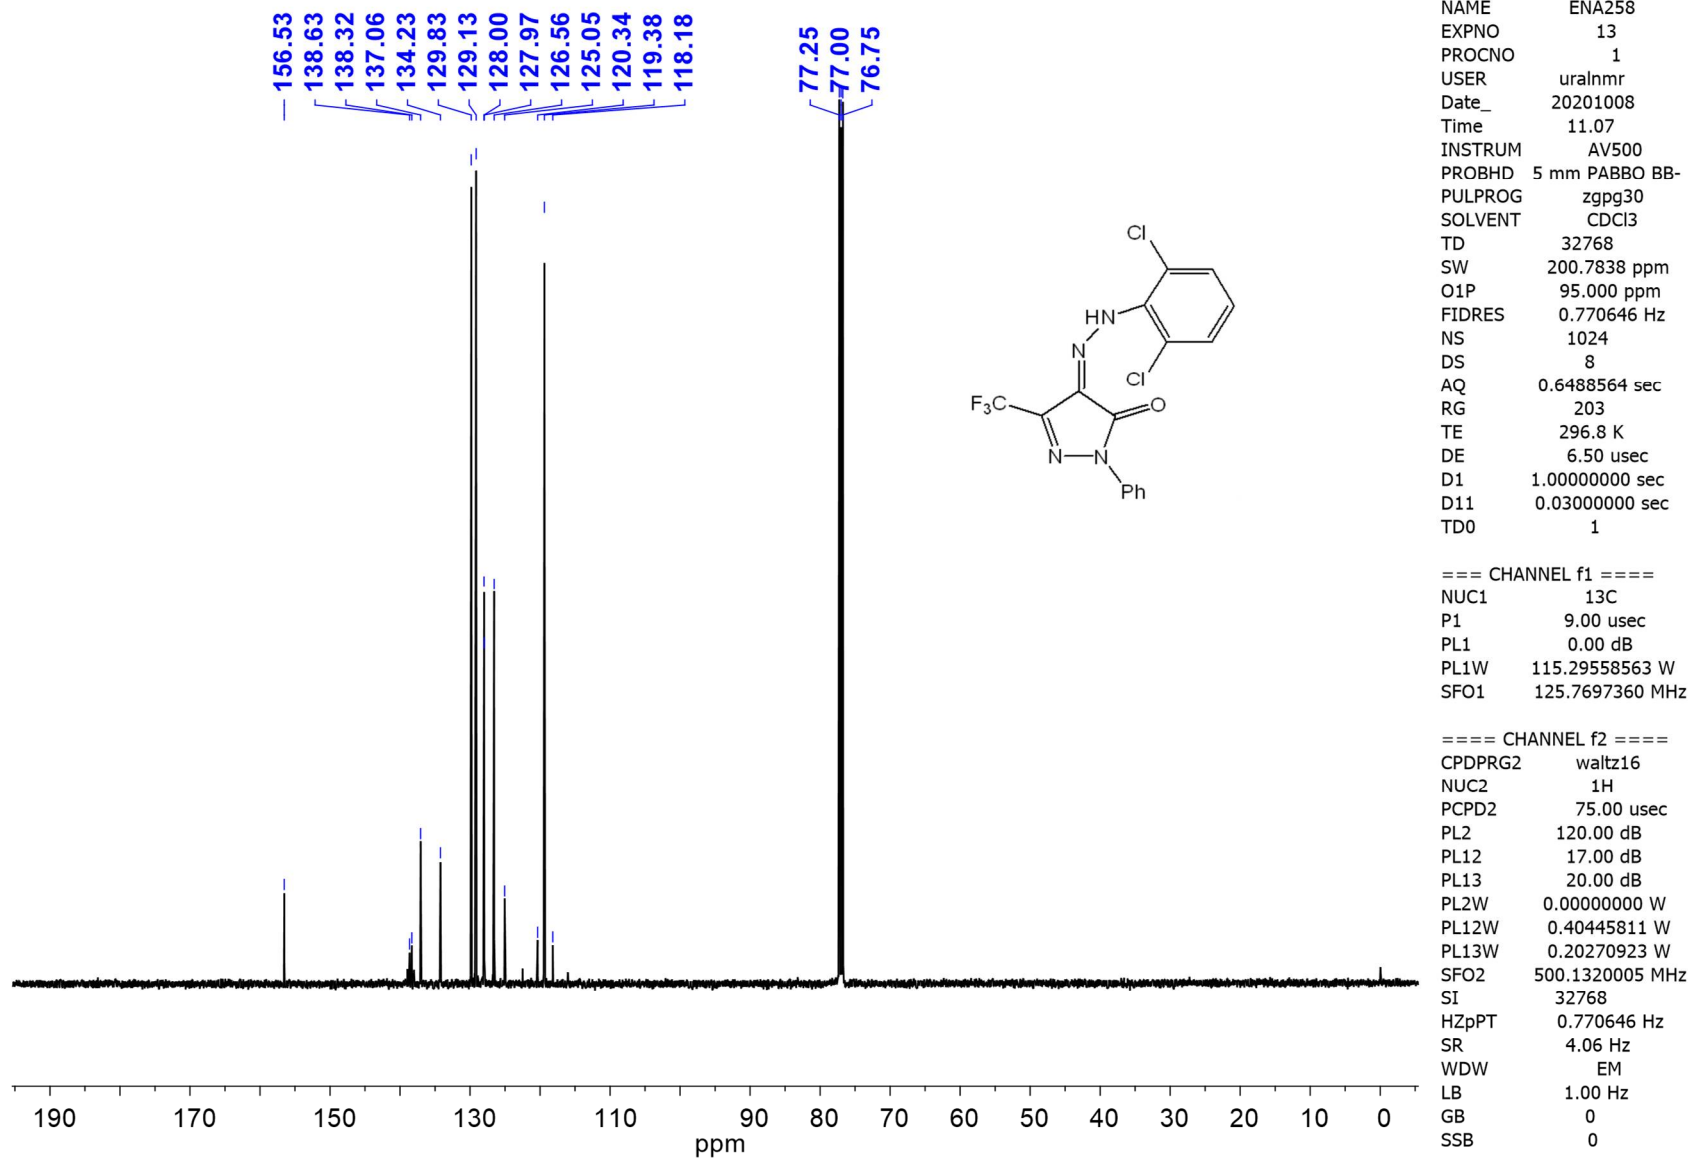

Figure S29.  $^{19}\text{F}$  NMR spectrum of compound **5j**

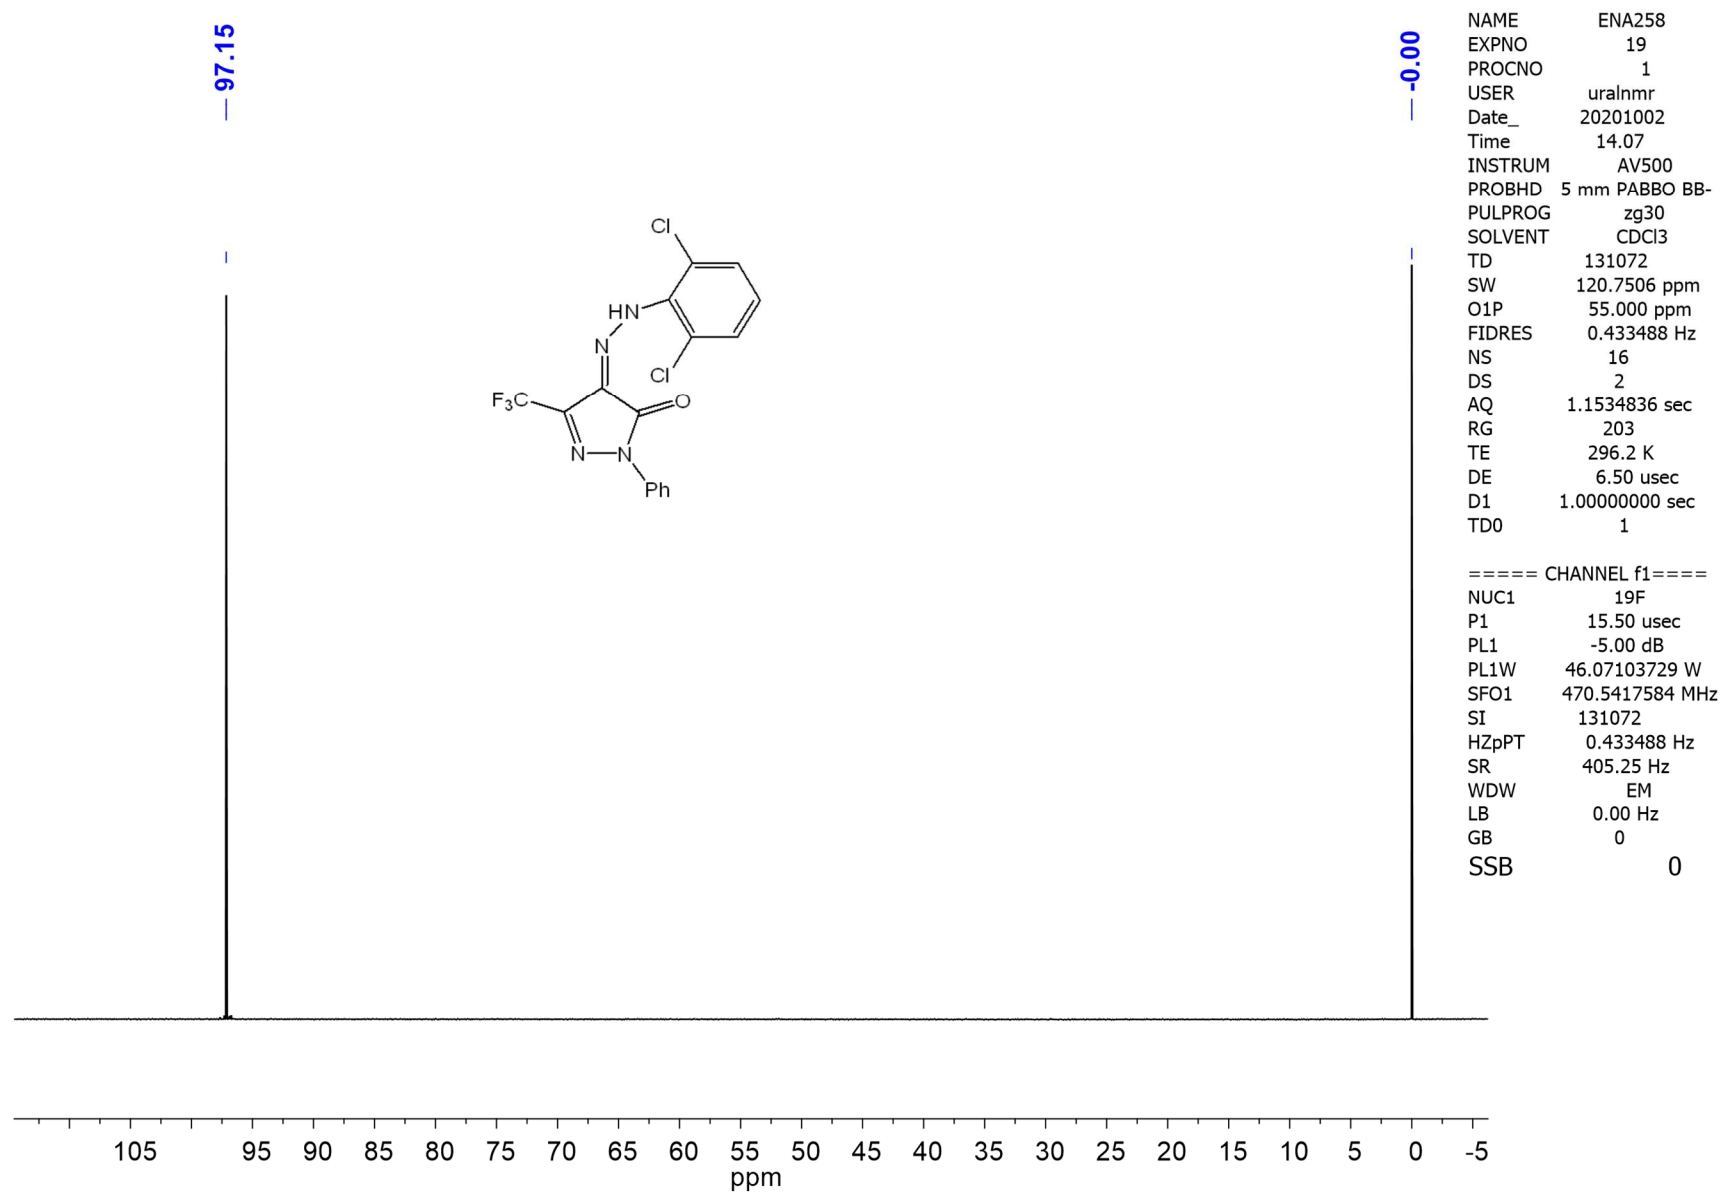



Figure S30. <sup>1</sup>H NMR spectrum of compound 5k

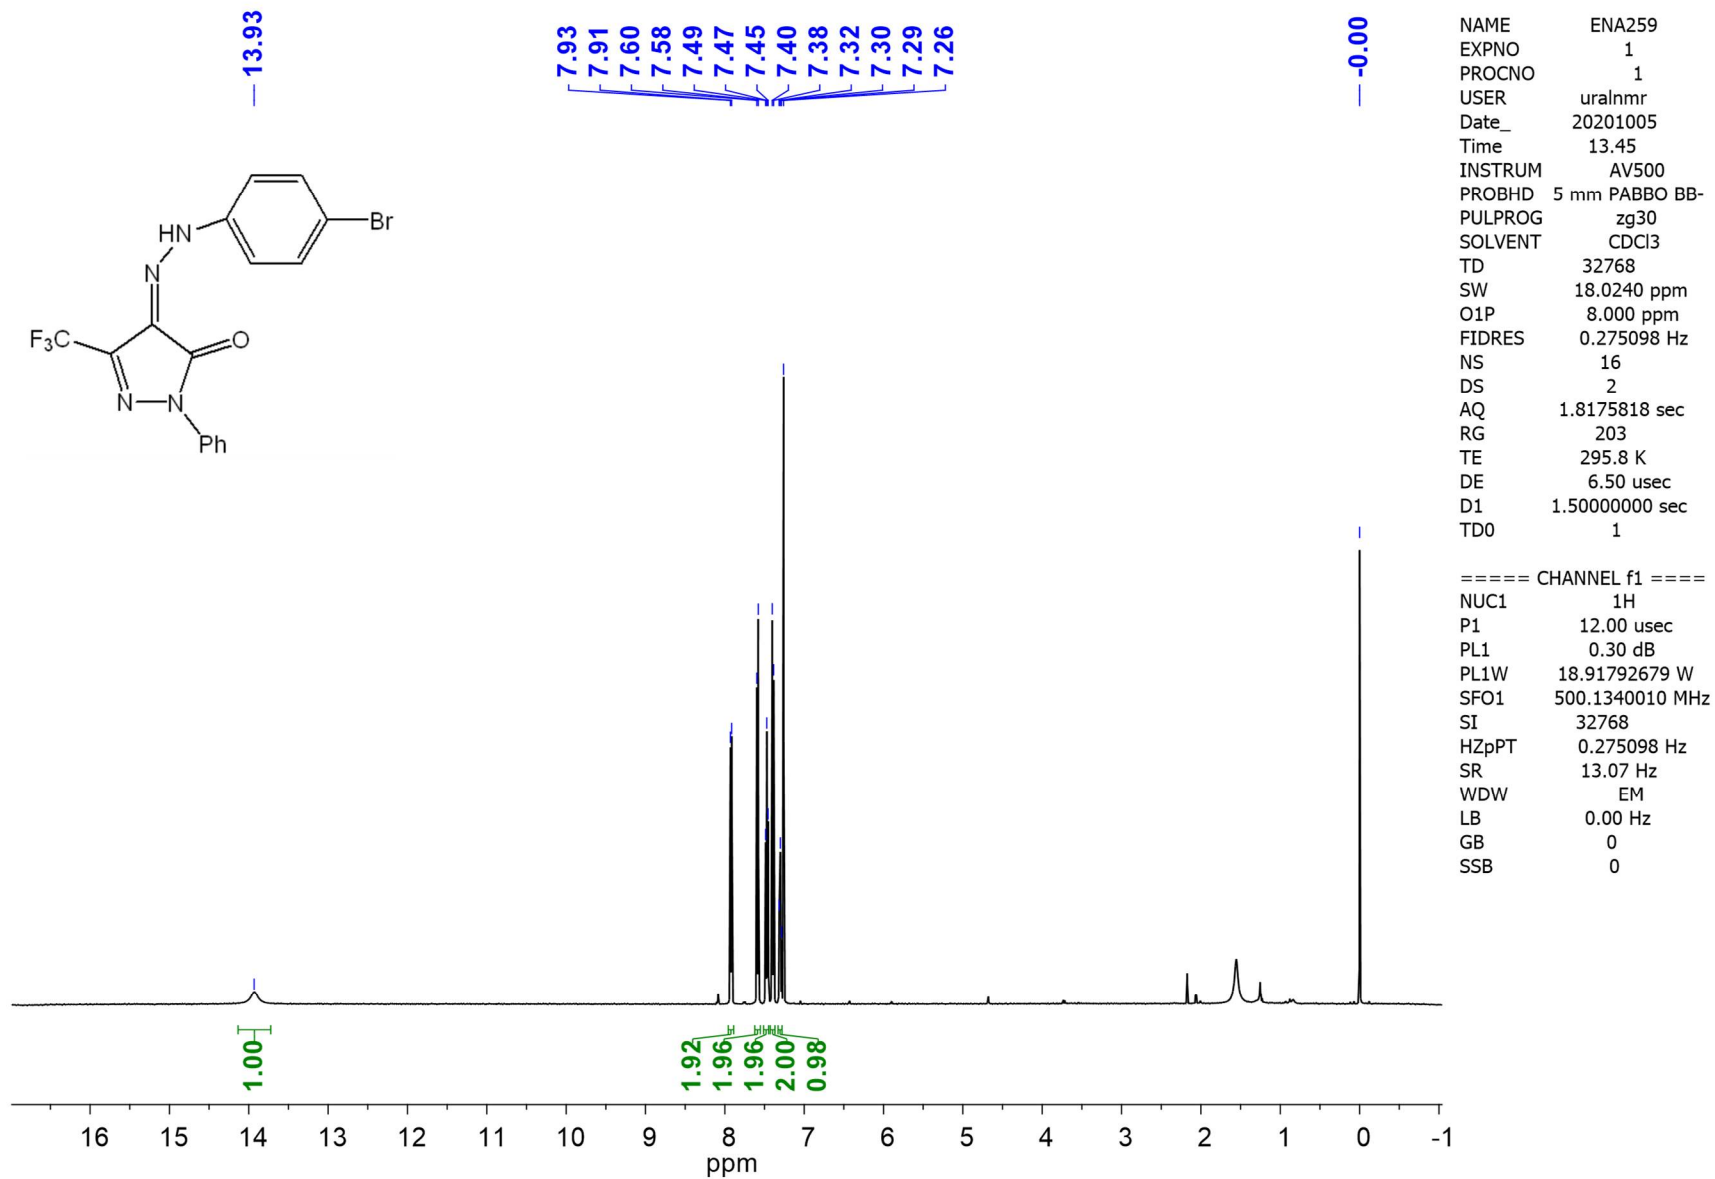

Figure S31.  $^{13}\text{C}$  NMR spectrum of compound **5k**

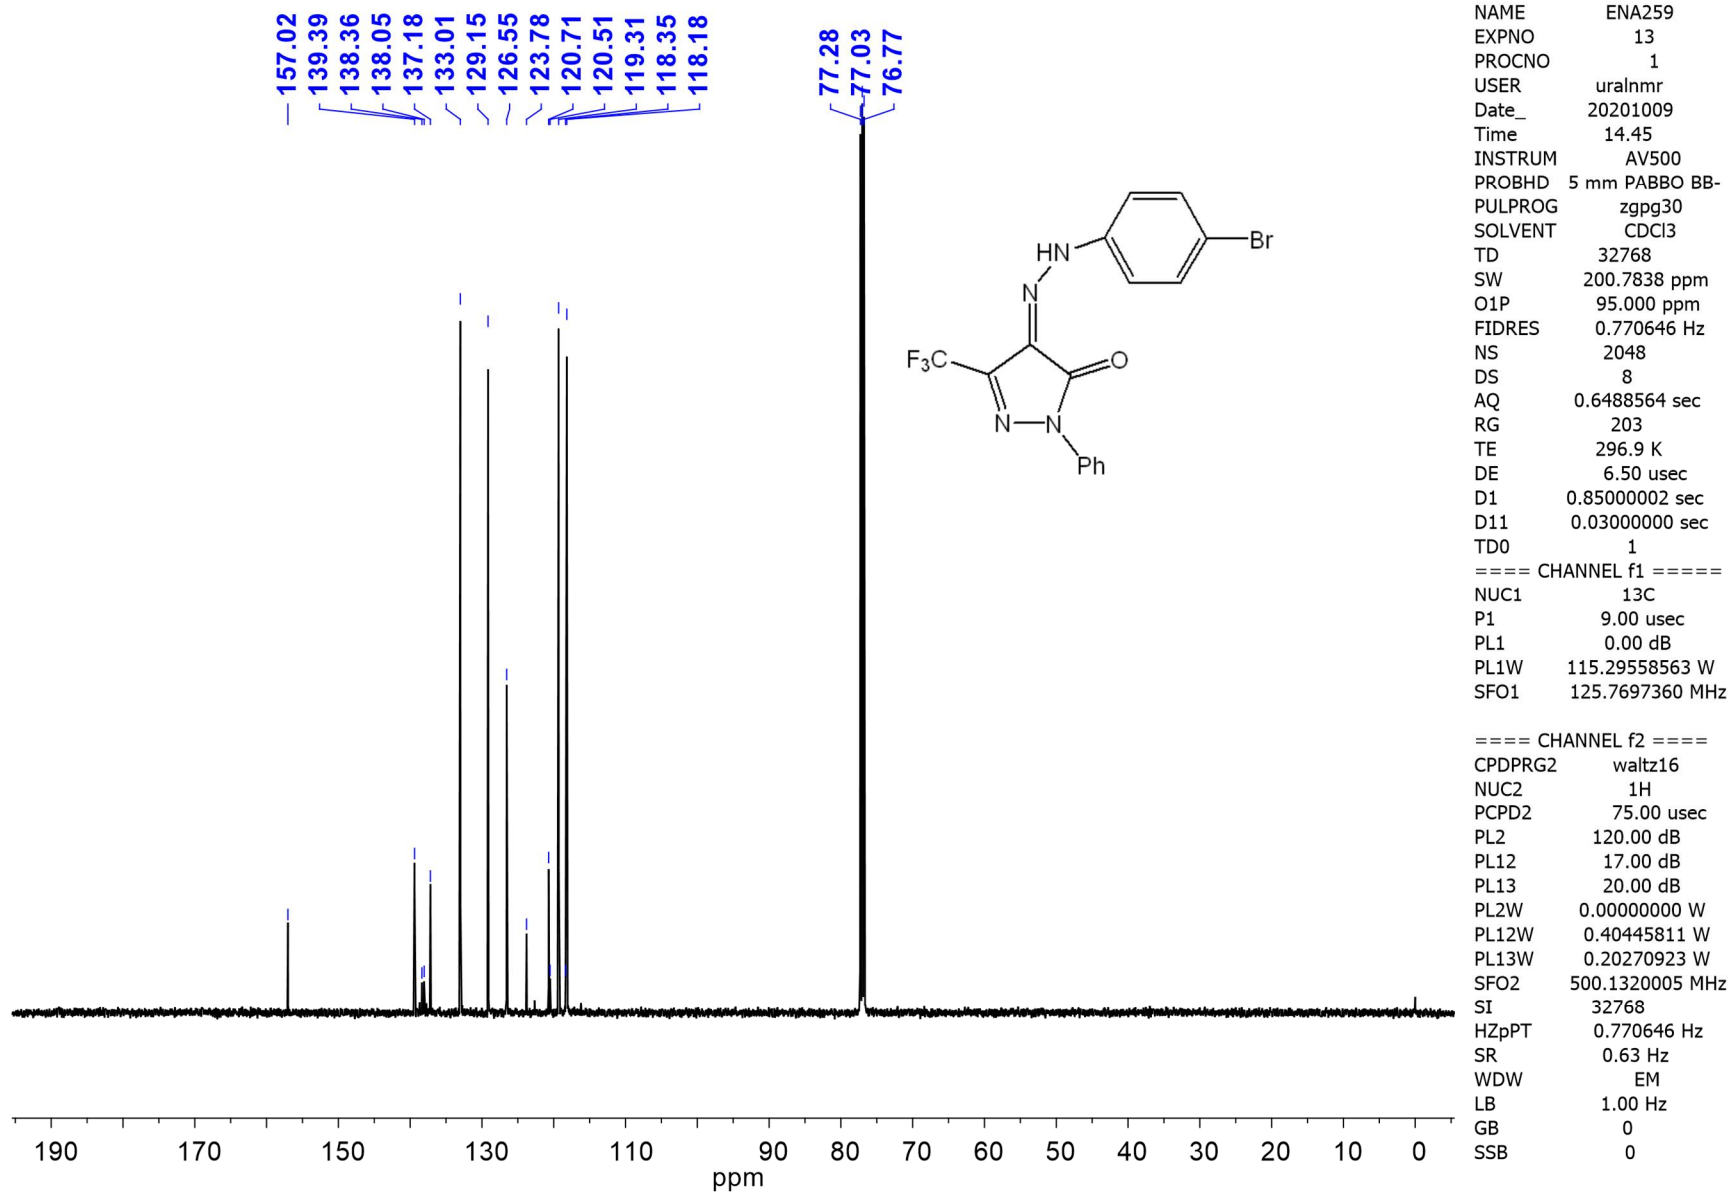

Figure S32.  $^{19}\text{F}$  NMR spectrum of compound **5k**

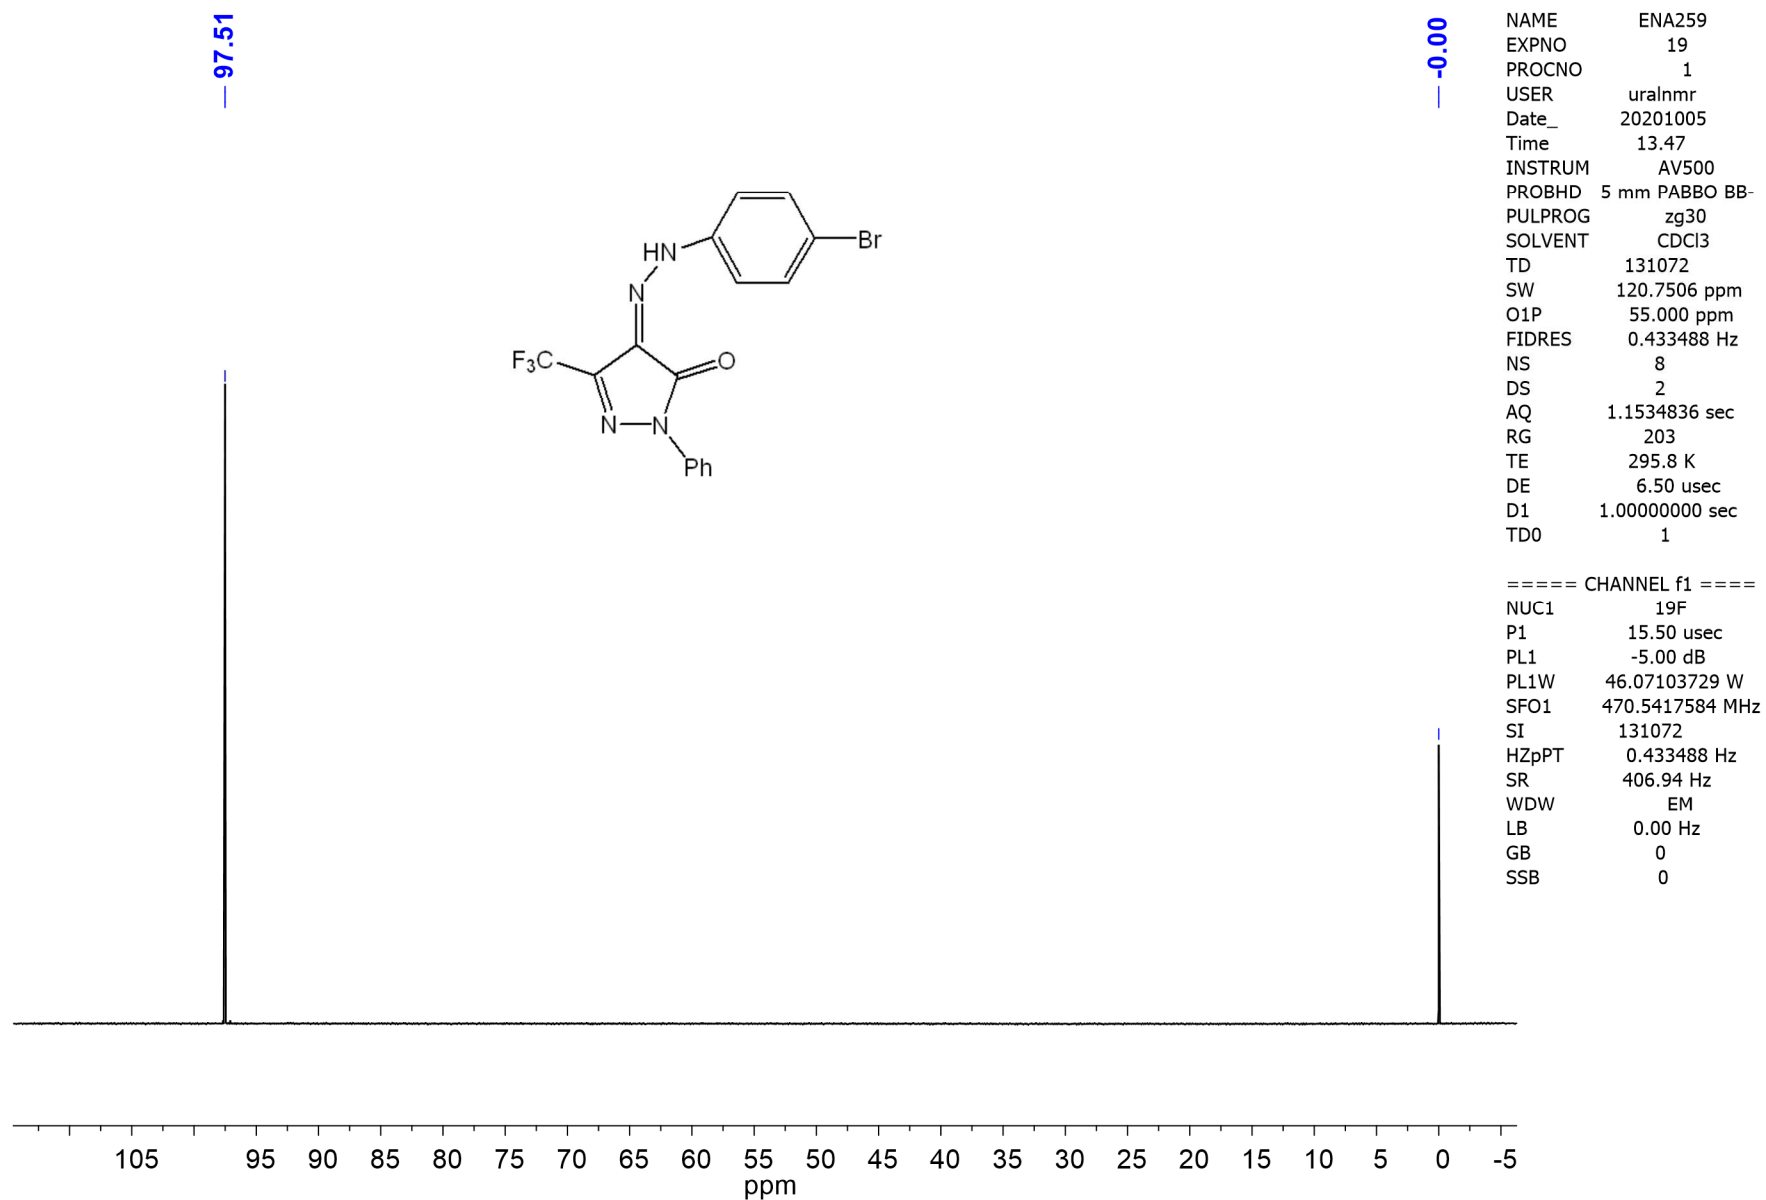

Figure S33. <sup>1</sup>H NMR spectrum of compound 51

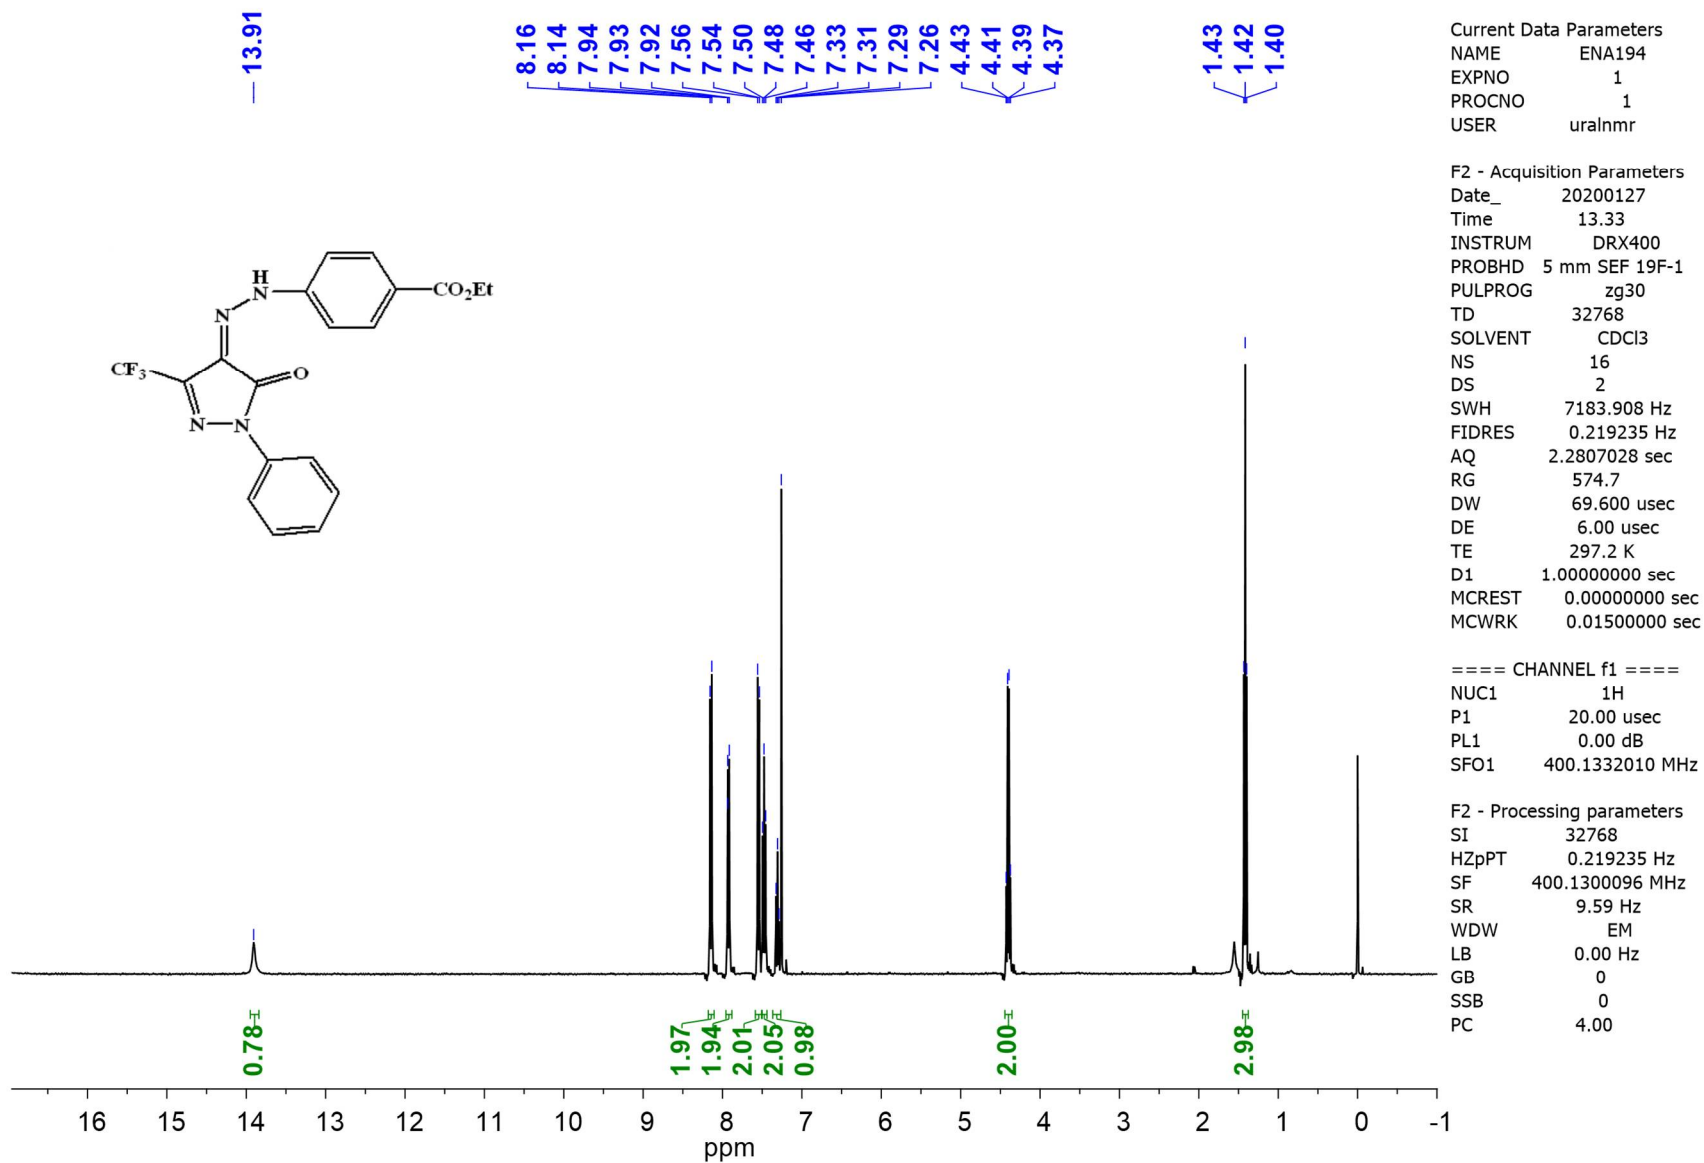

Figure S34.  $^{13}\text{C}$  NMR spectrum of compound **51**

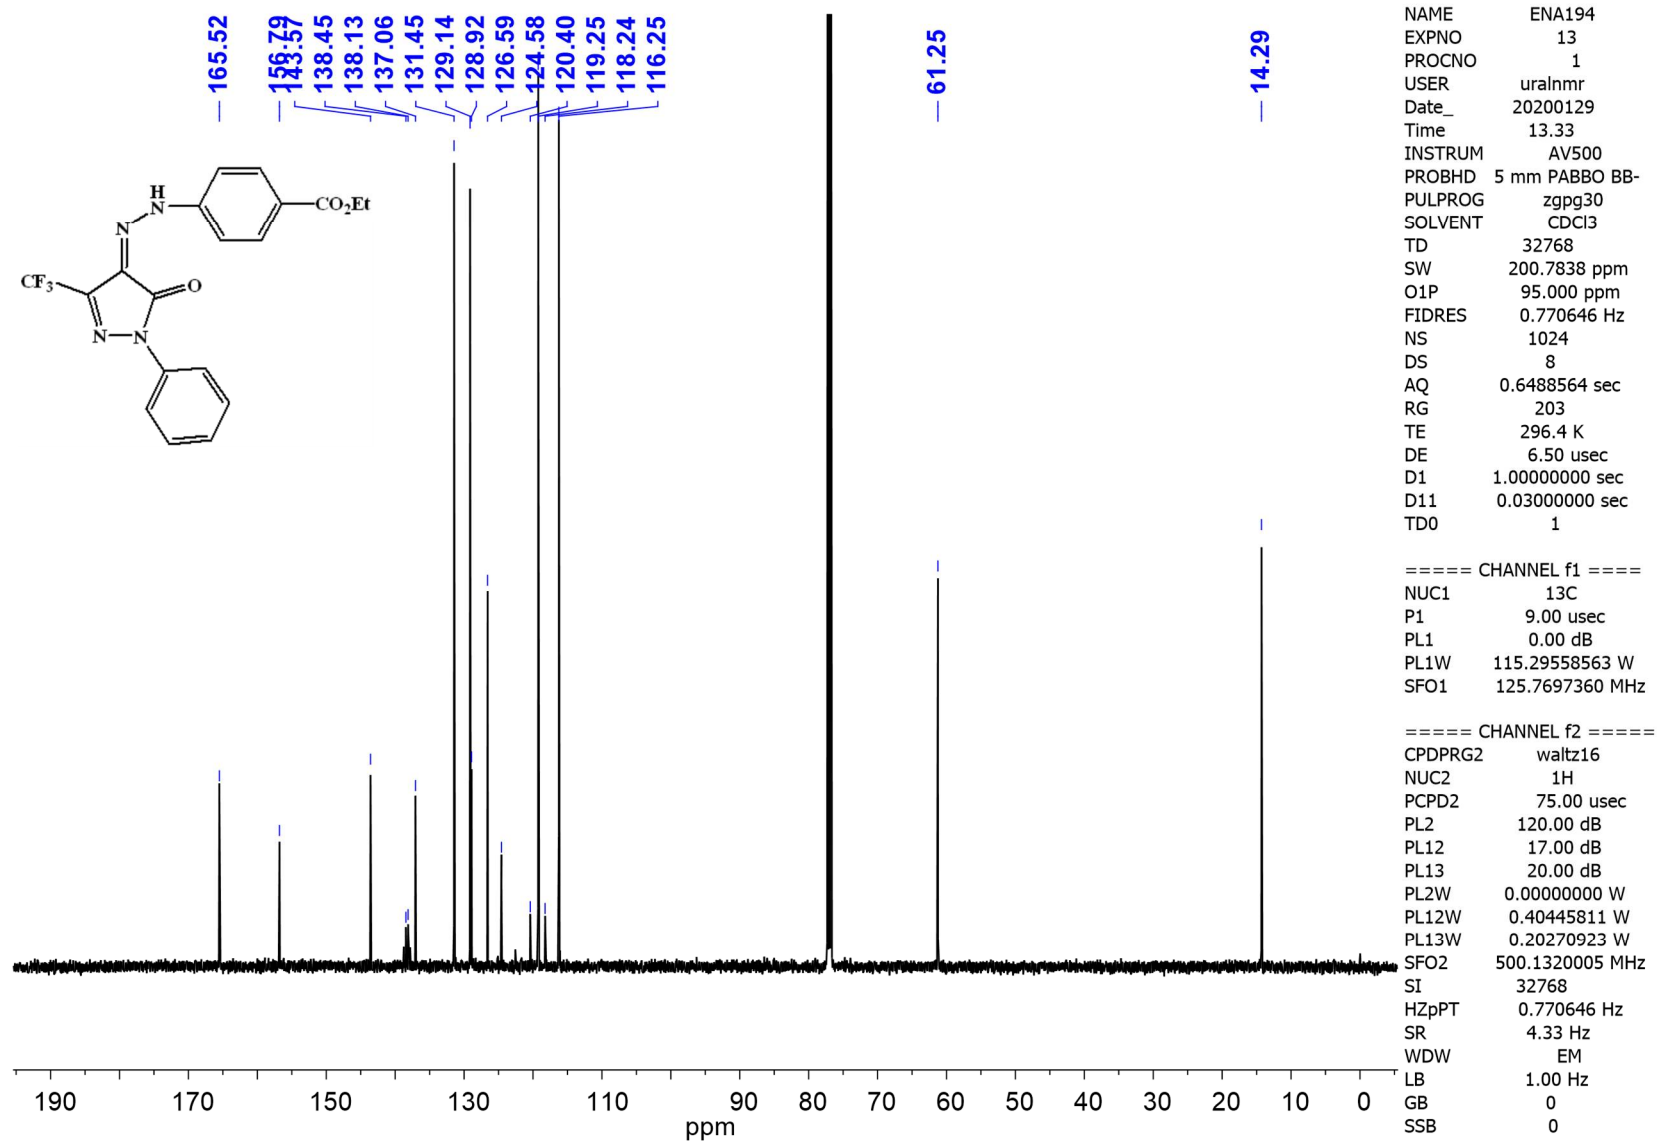

Figure S35.  $^{19}\text{F}$  NMR spectrum of compound **51**

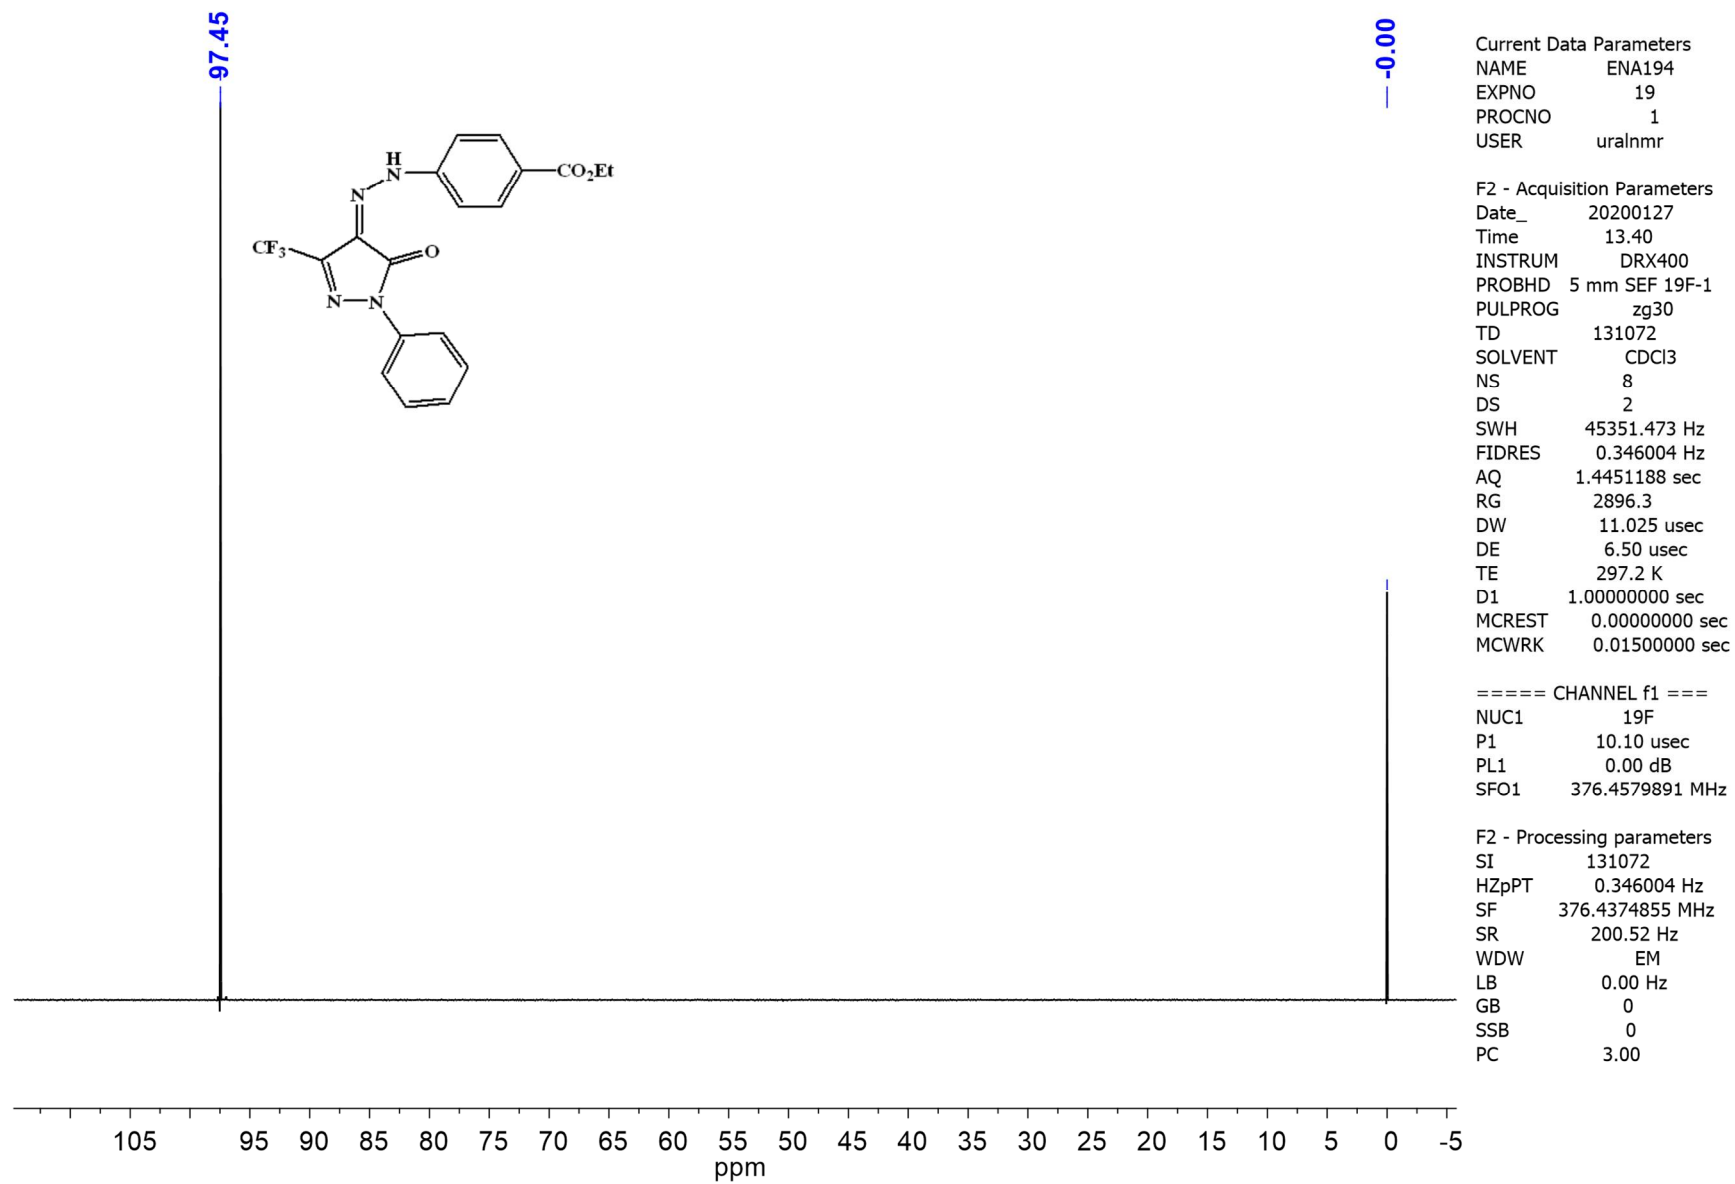

Figure S36. <sup>1</sup>H NMR spectrum of compound **5m**

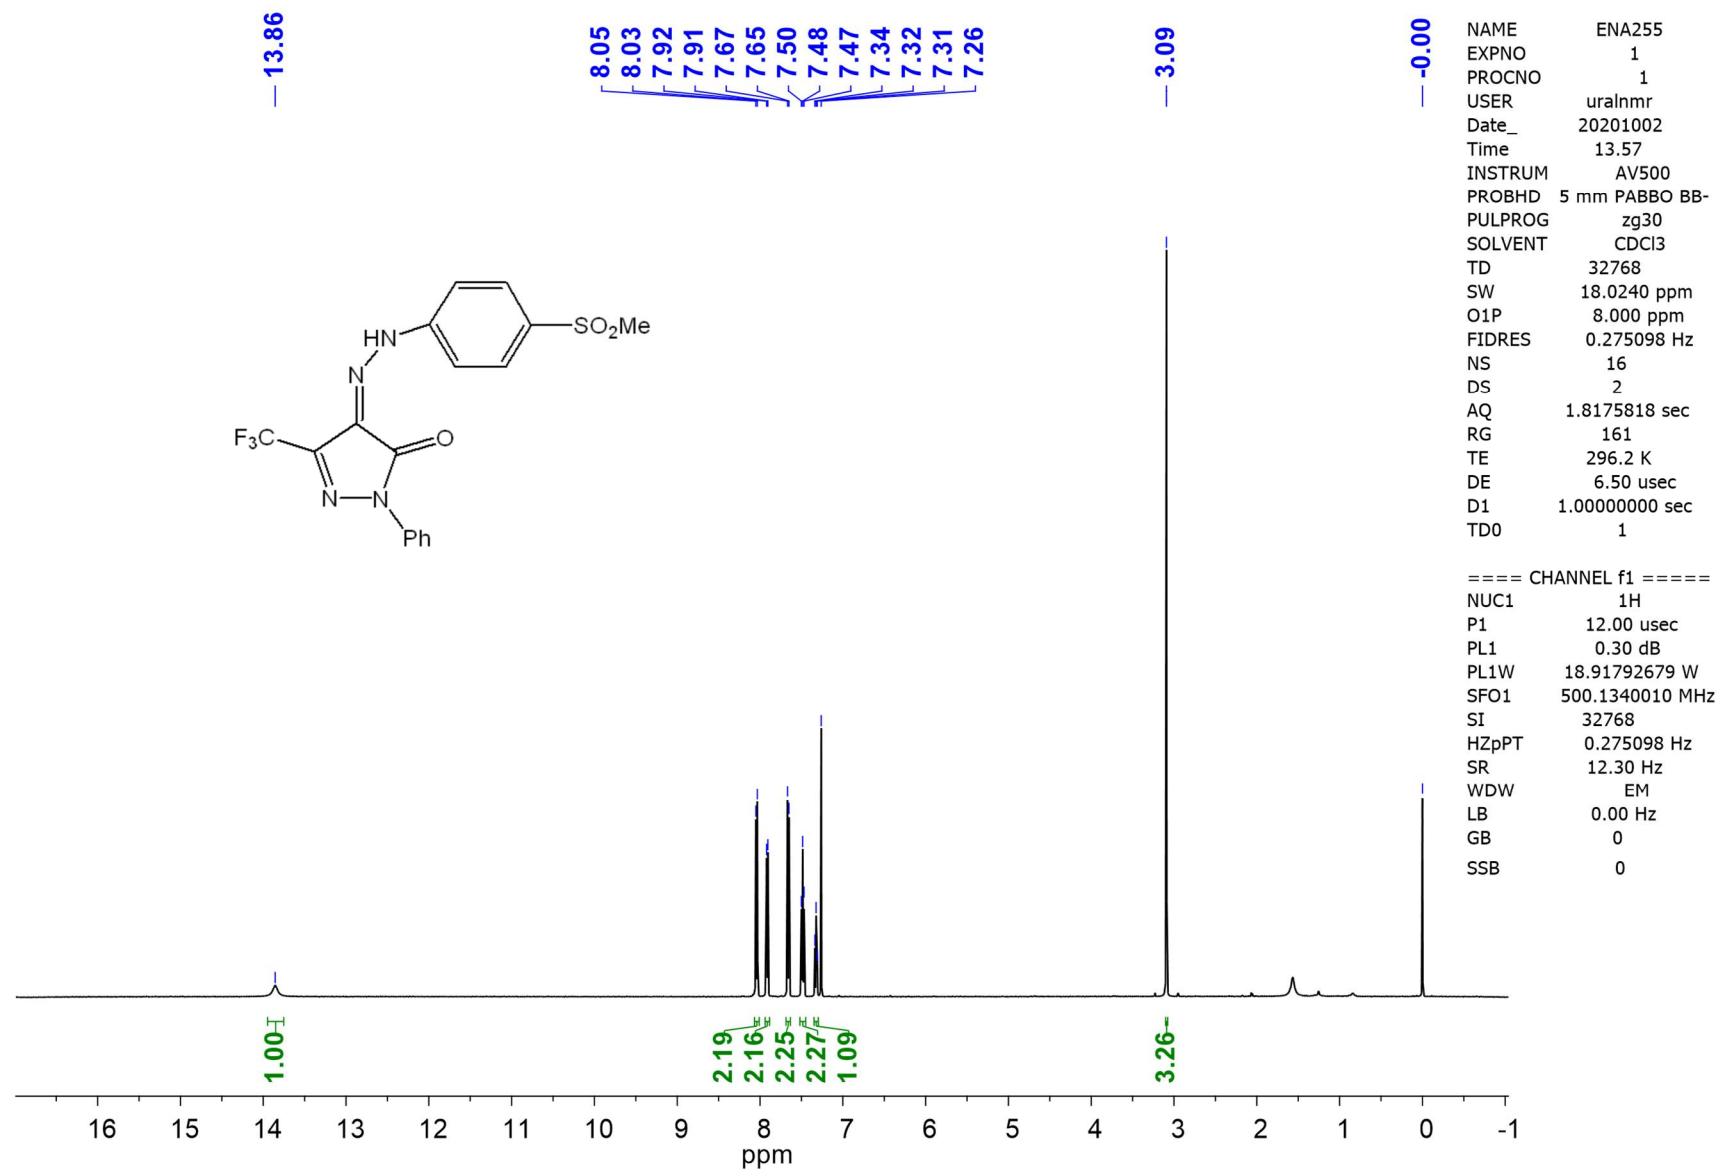

Figure S37. <sup>13</sup>C NMR spectrum of compound **5m**

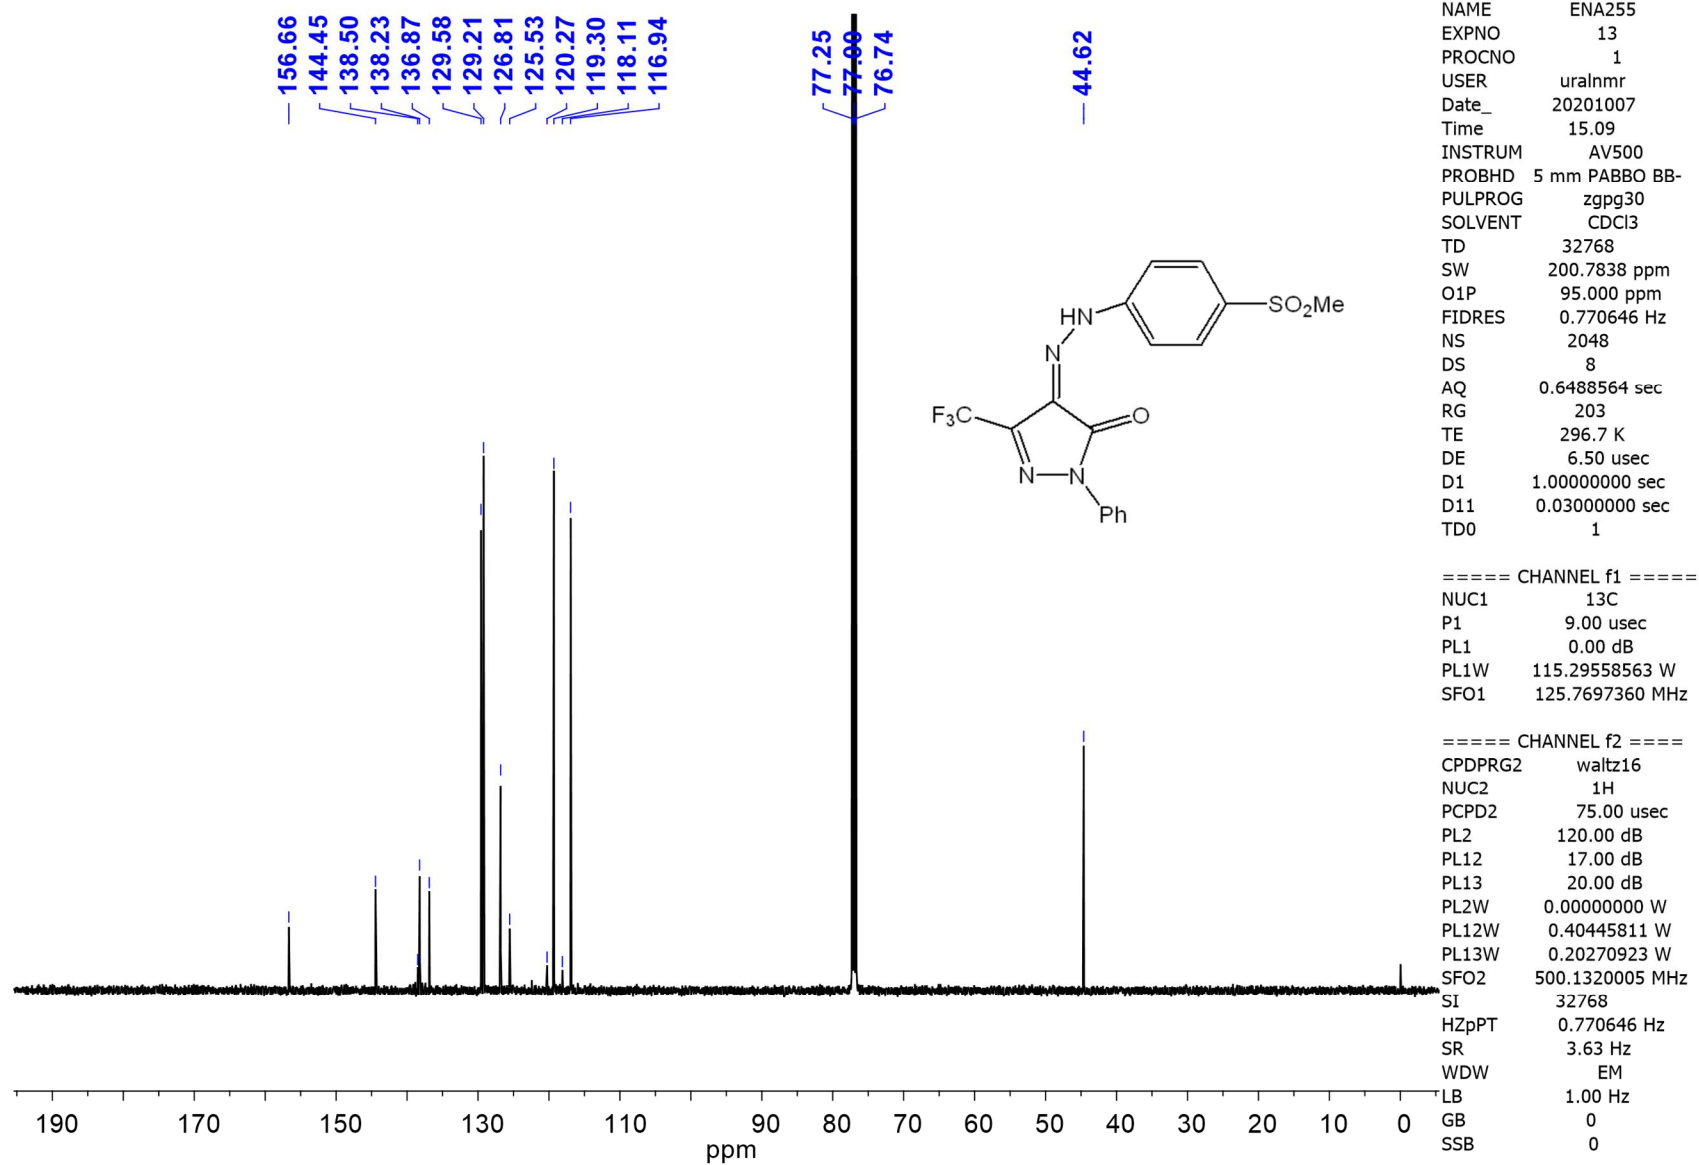



Figure S38.  $^{19}\text{F}$  NMR spectrum of compound **5m**

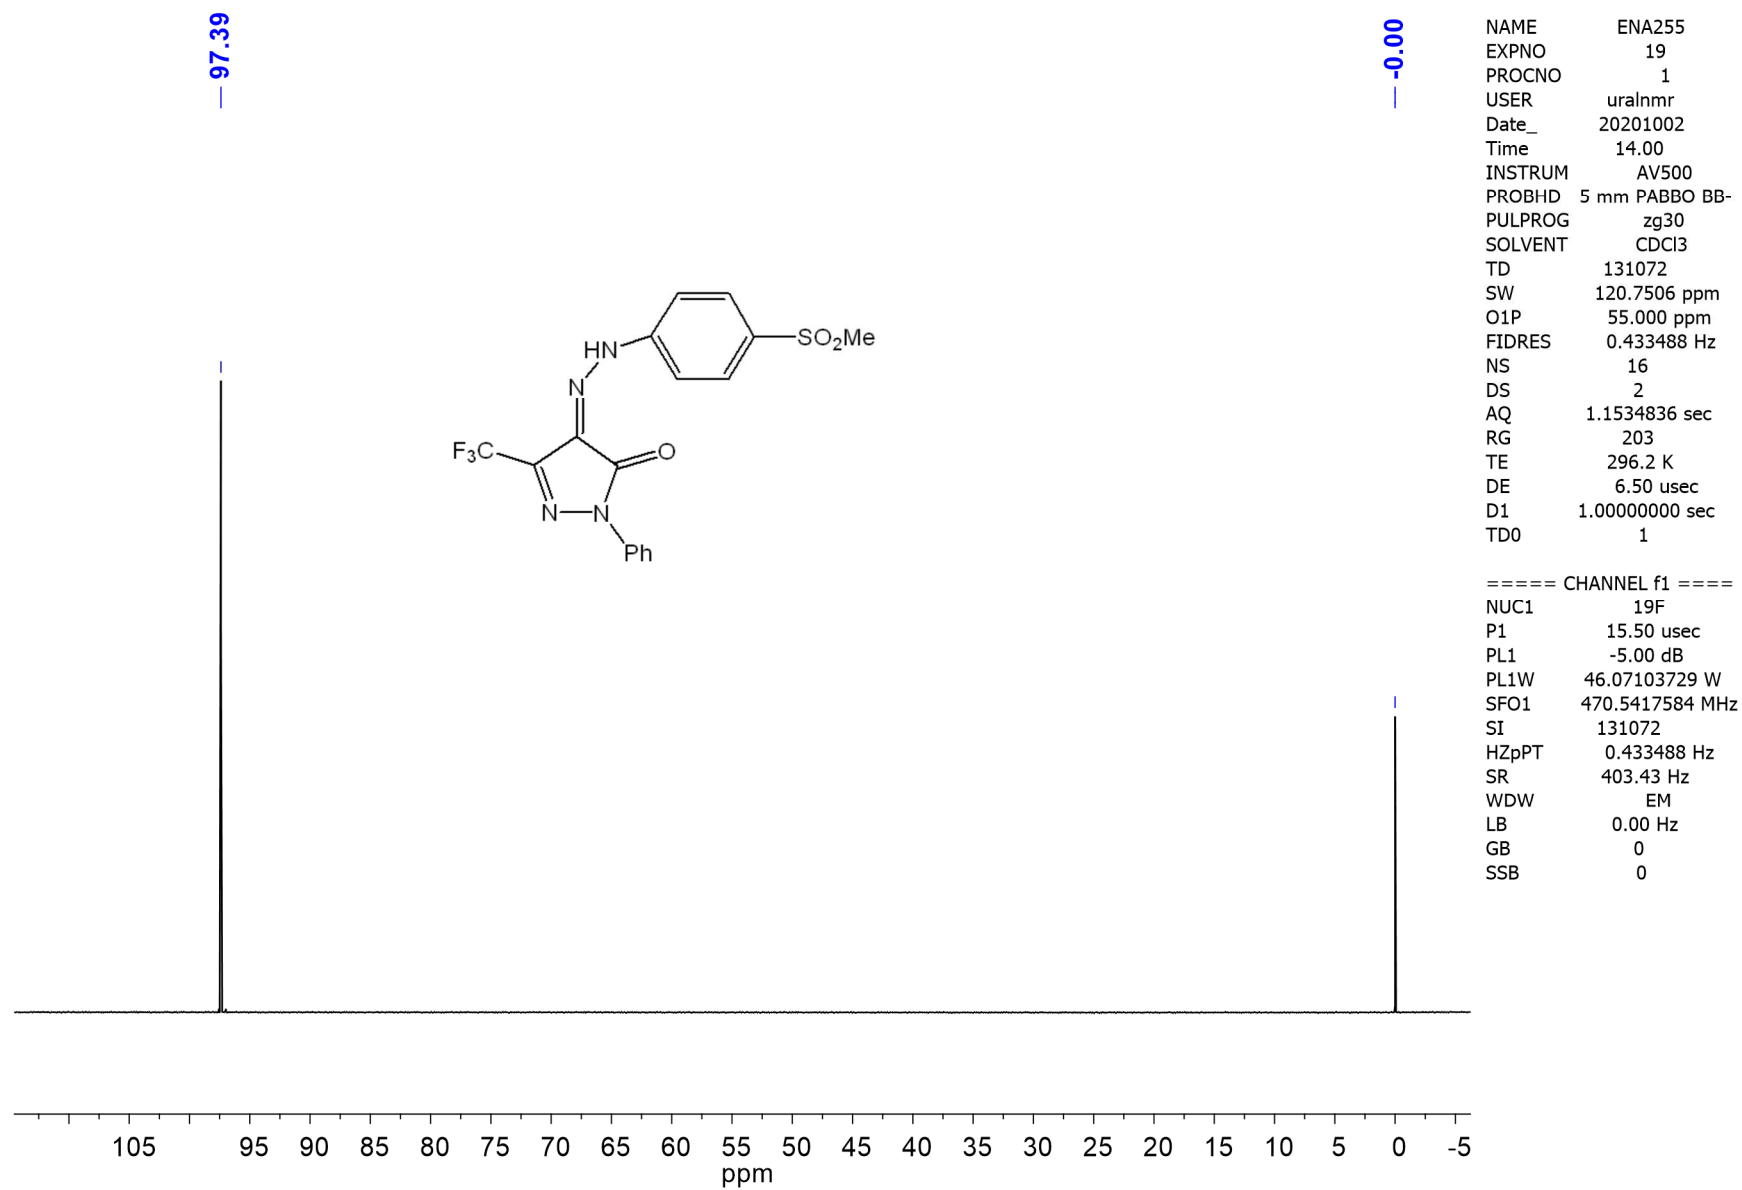

Figure S39. <sup>1</sup>H NMR spectrum of compound **5n**

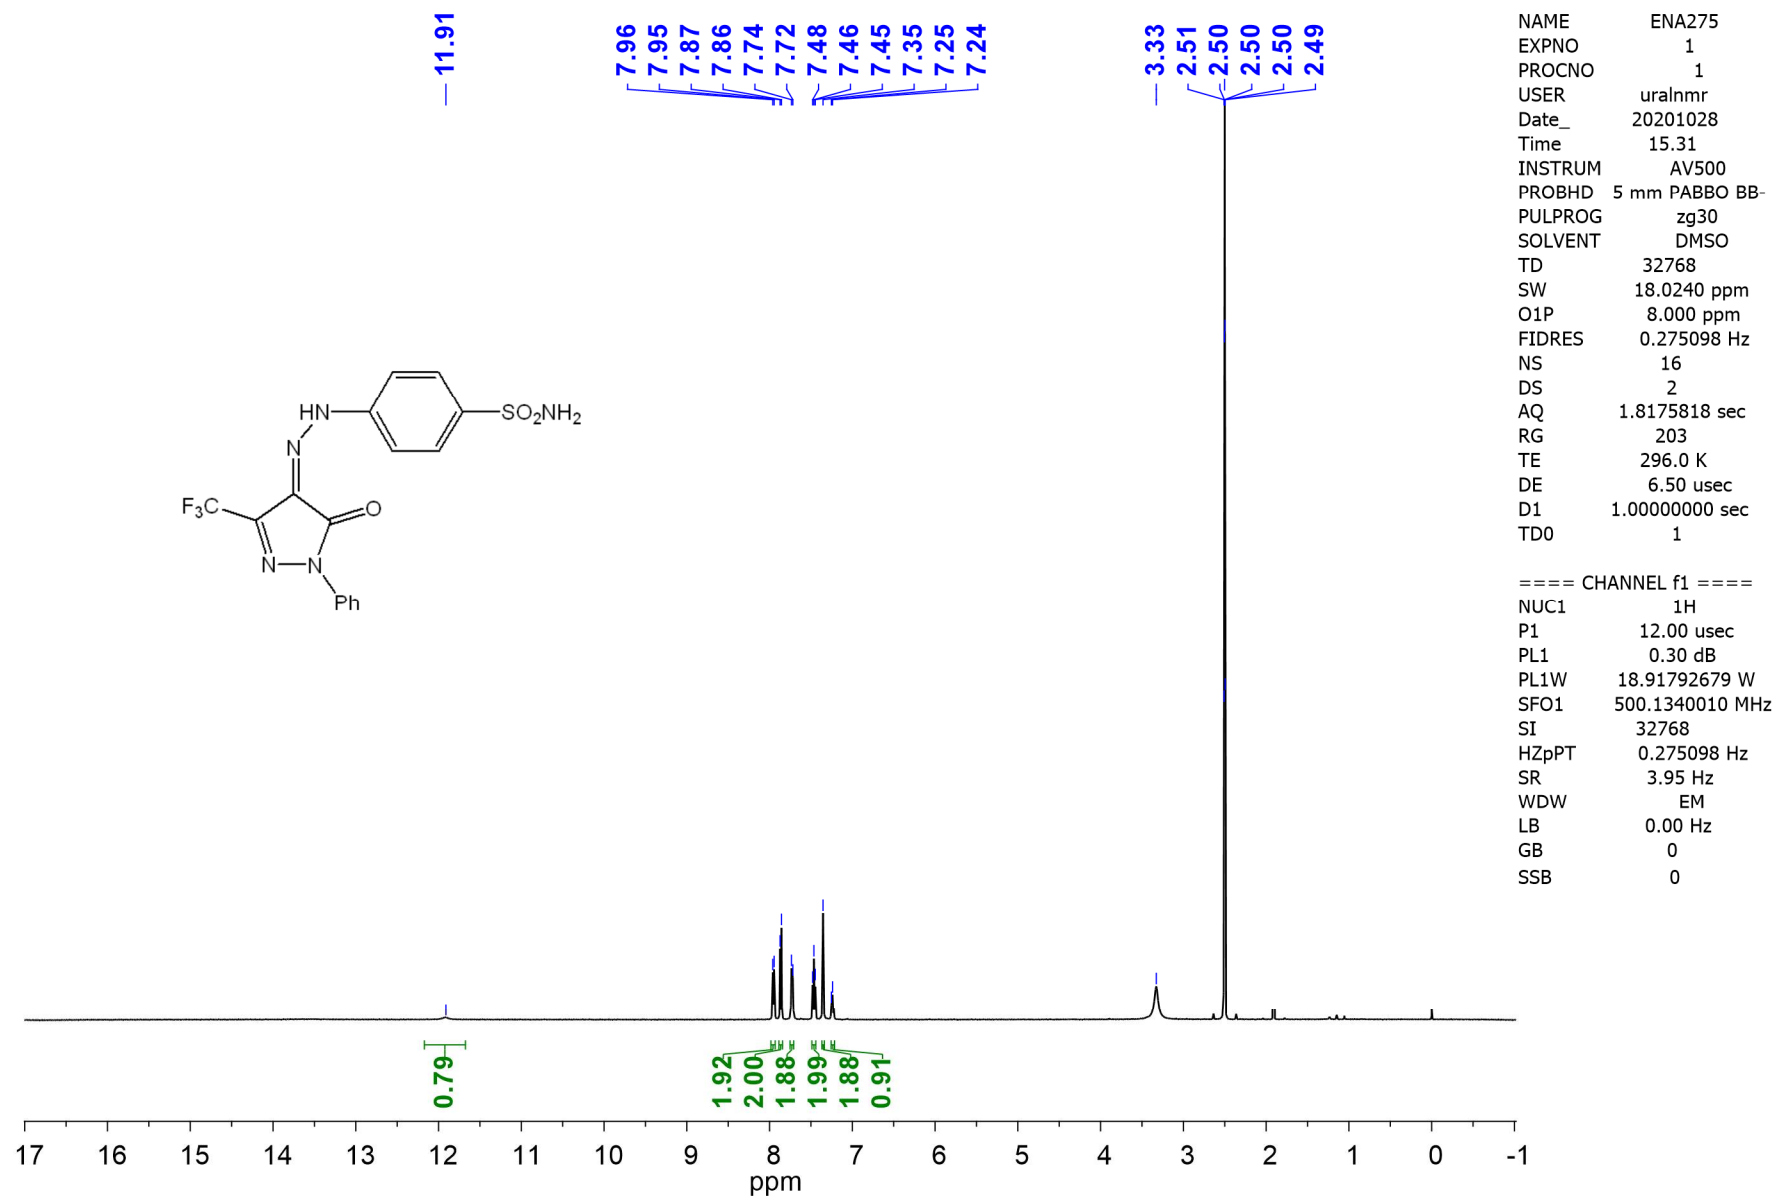

Figure S40.  $^{13}\text{C}$  NMR spectrum of compound **5n**

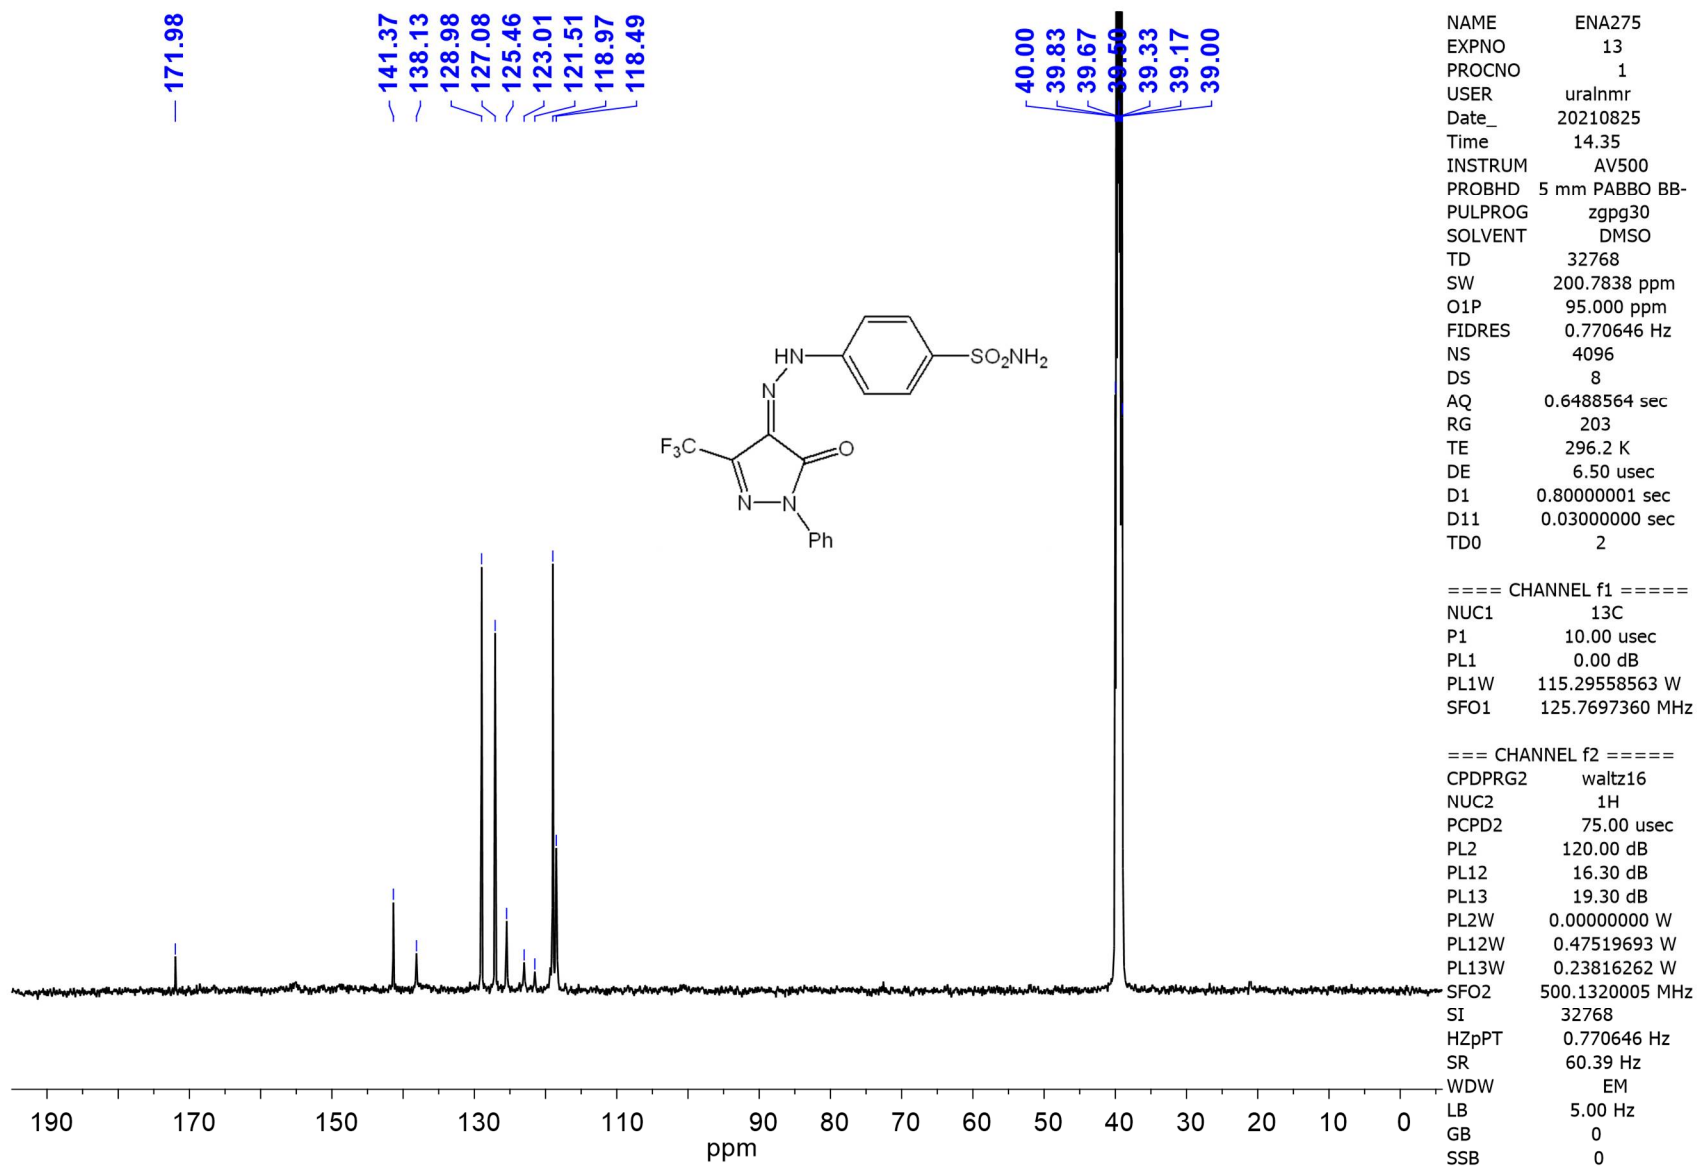

Figure S41.  $^{19}\text{F}$  NMR spectrum of compound **5n**

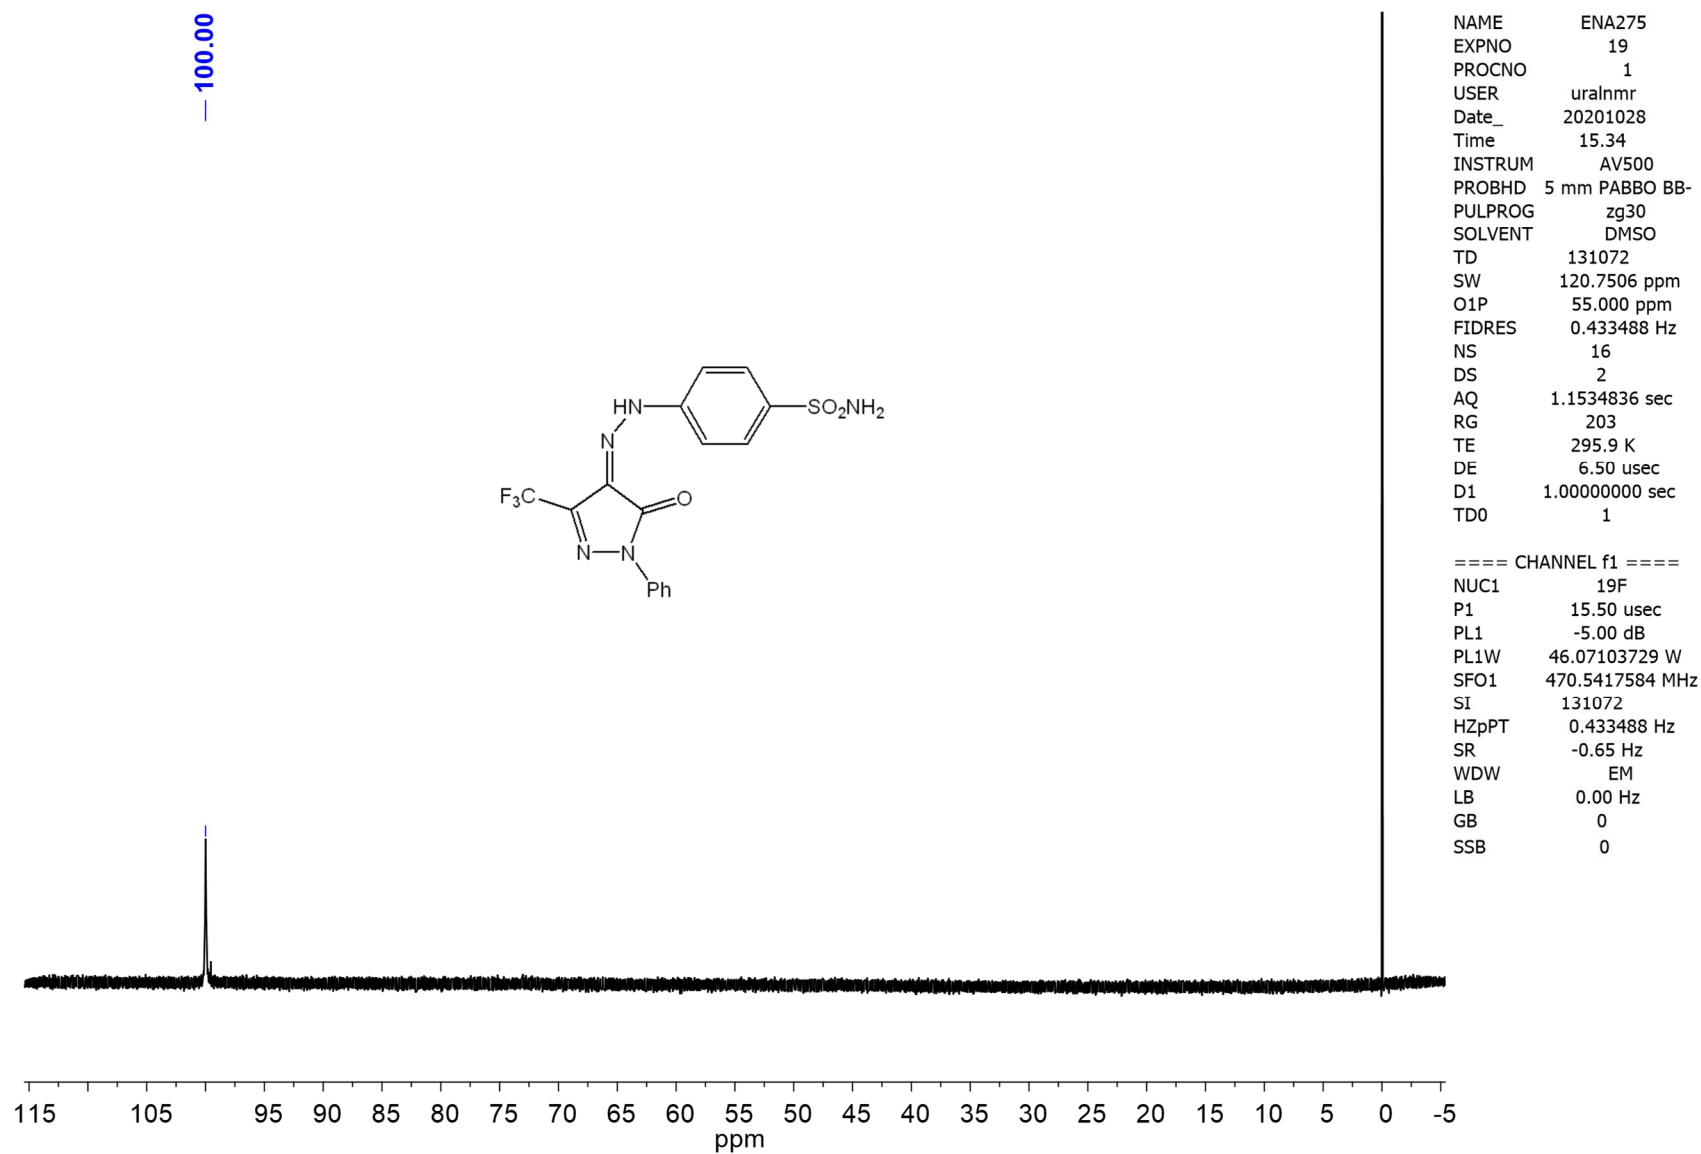

Figure S42. <sup>1</sup>H NMR spectrum of compound **5o**

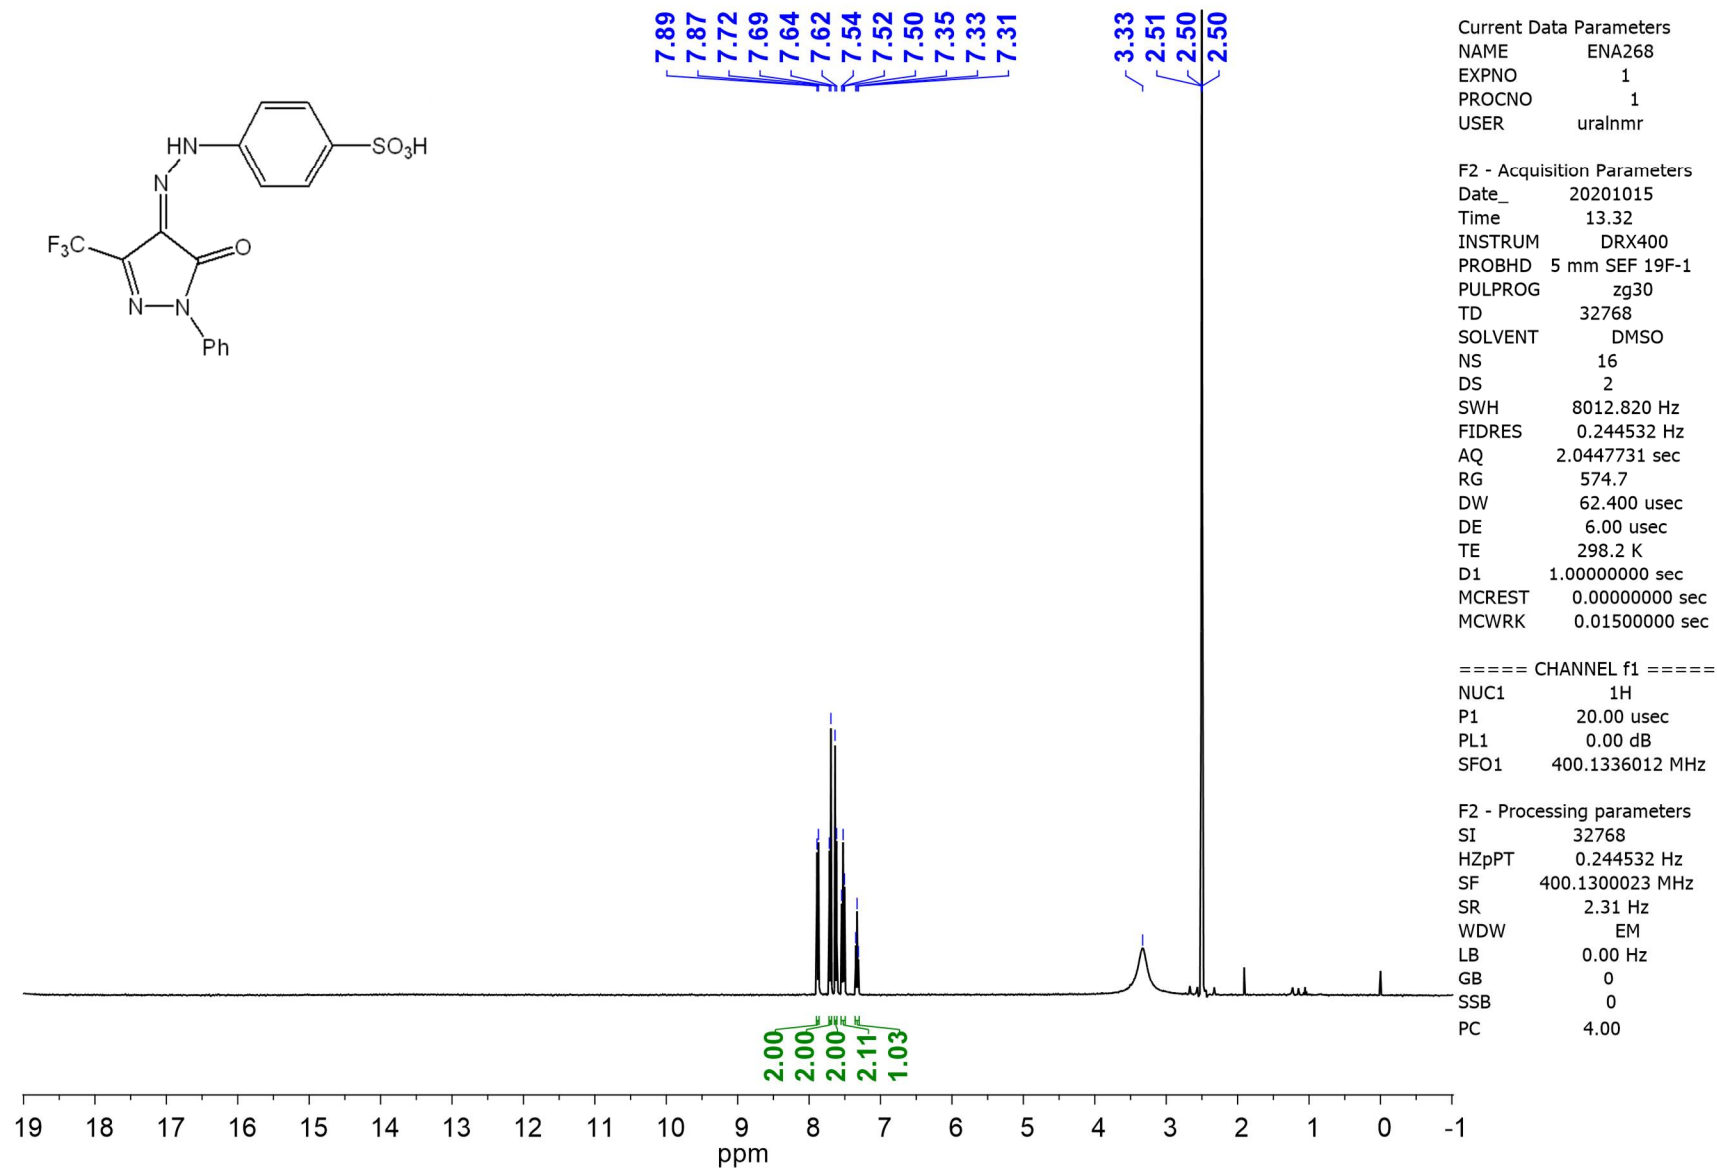

Figure S43.  $^{13}\text{C}$  NMR spectrum of compound **5o**

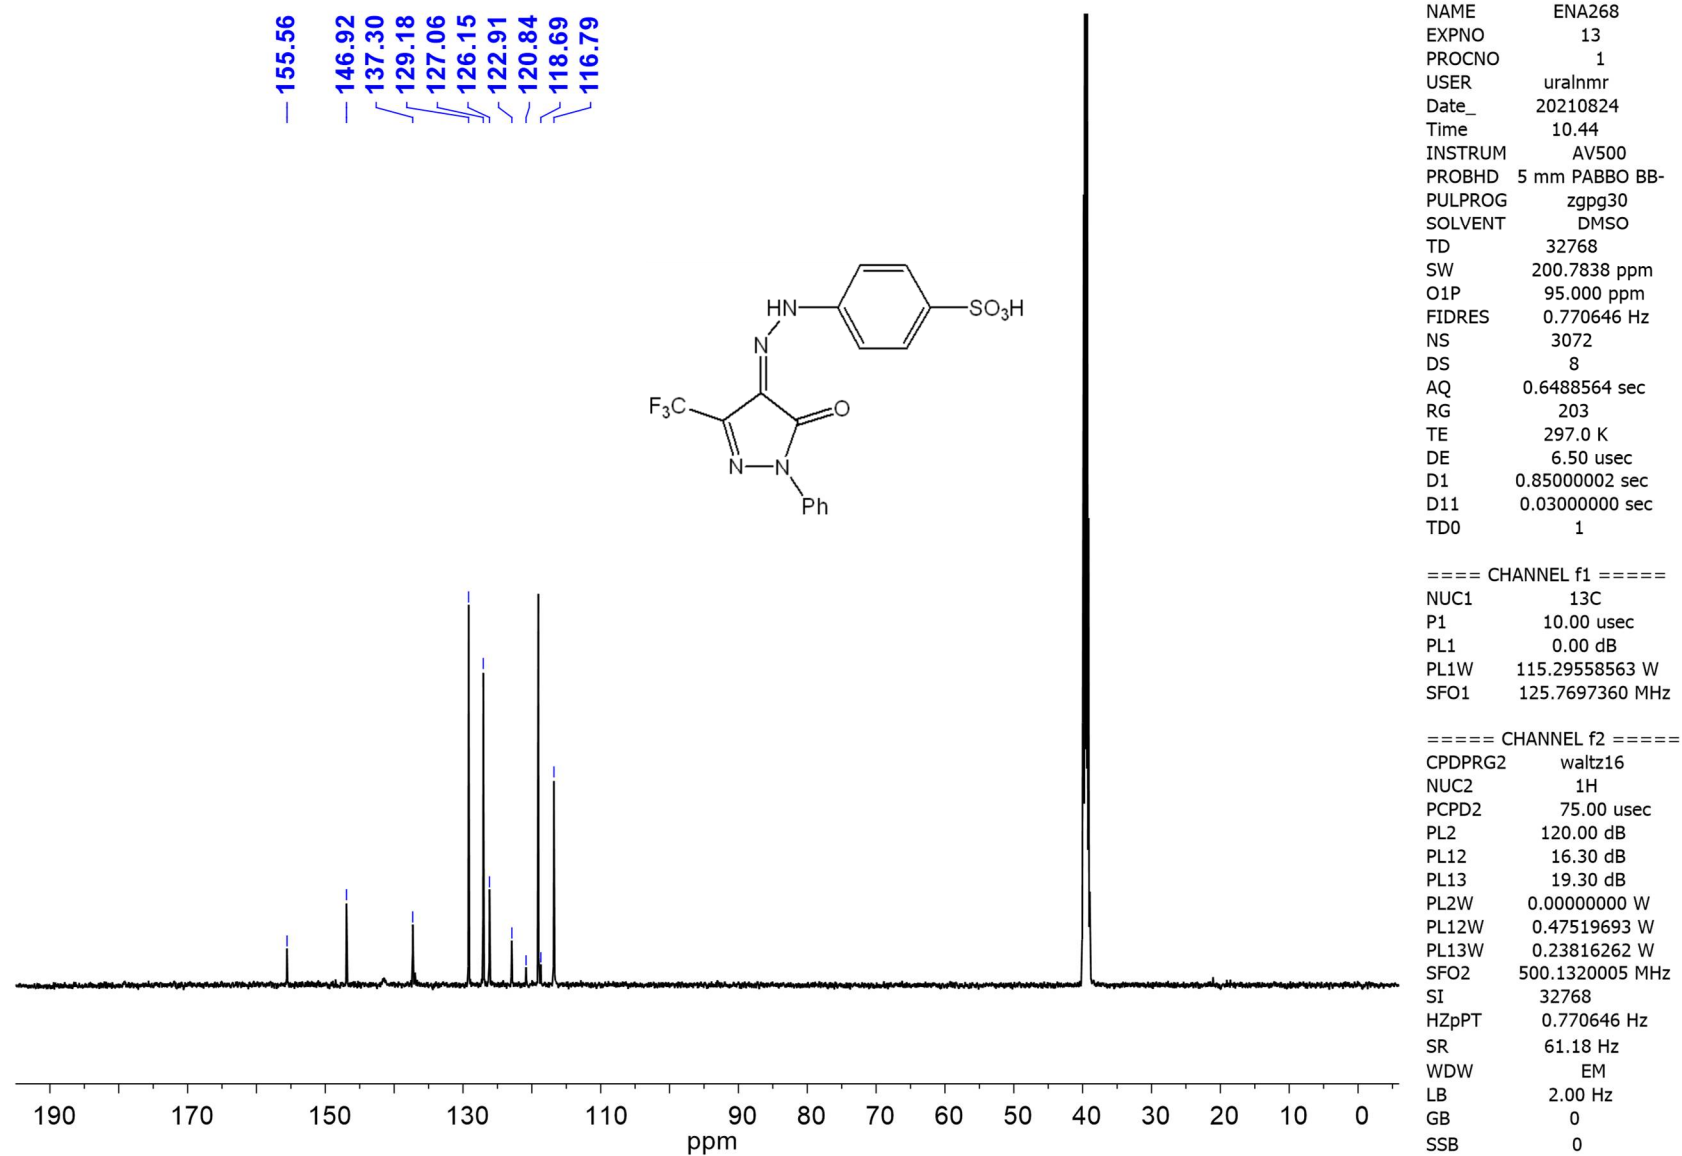

Figure S44.  $^{19}\text{F}$  NMR spectrum of compound **5o**

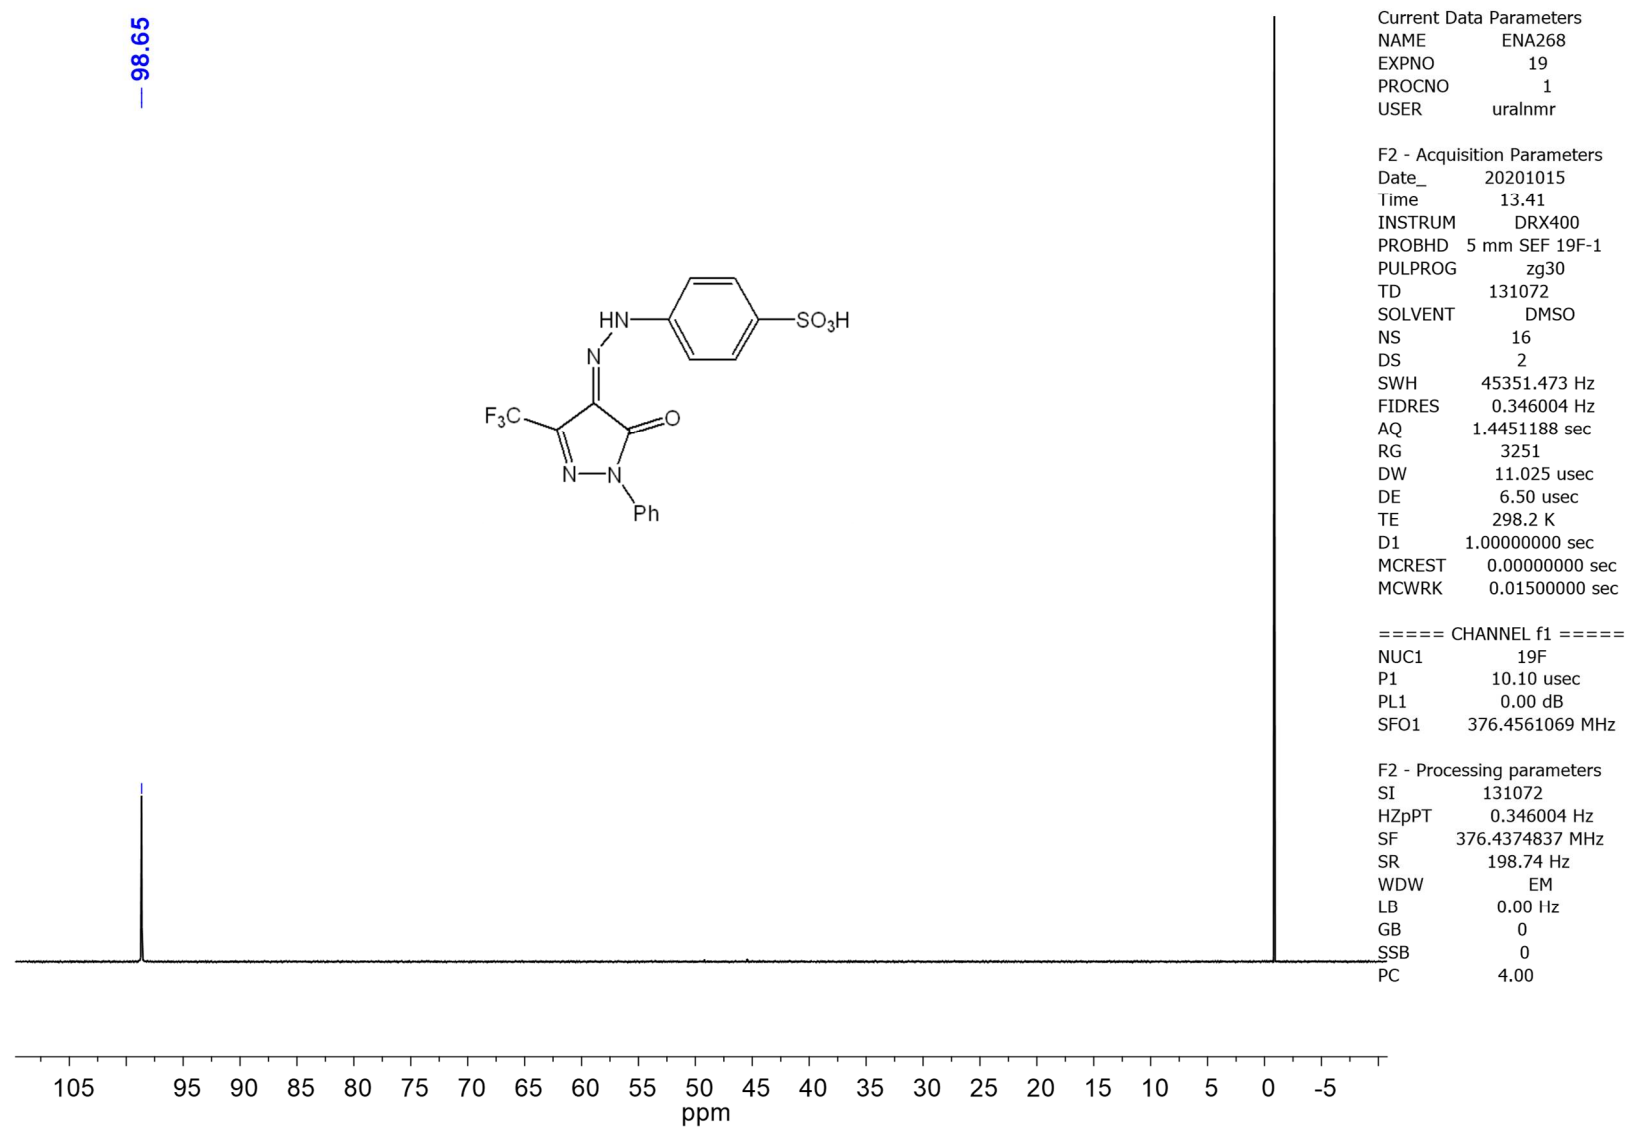

Figure S45.  $^1\text{H}$  NMR spectrum of compound **5p**

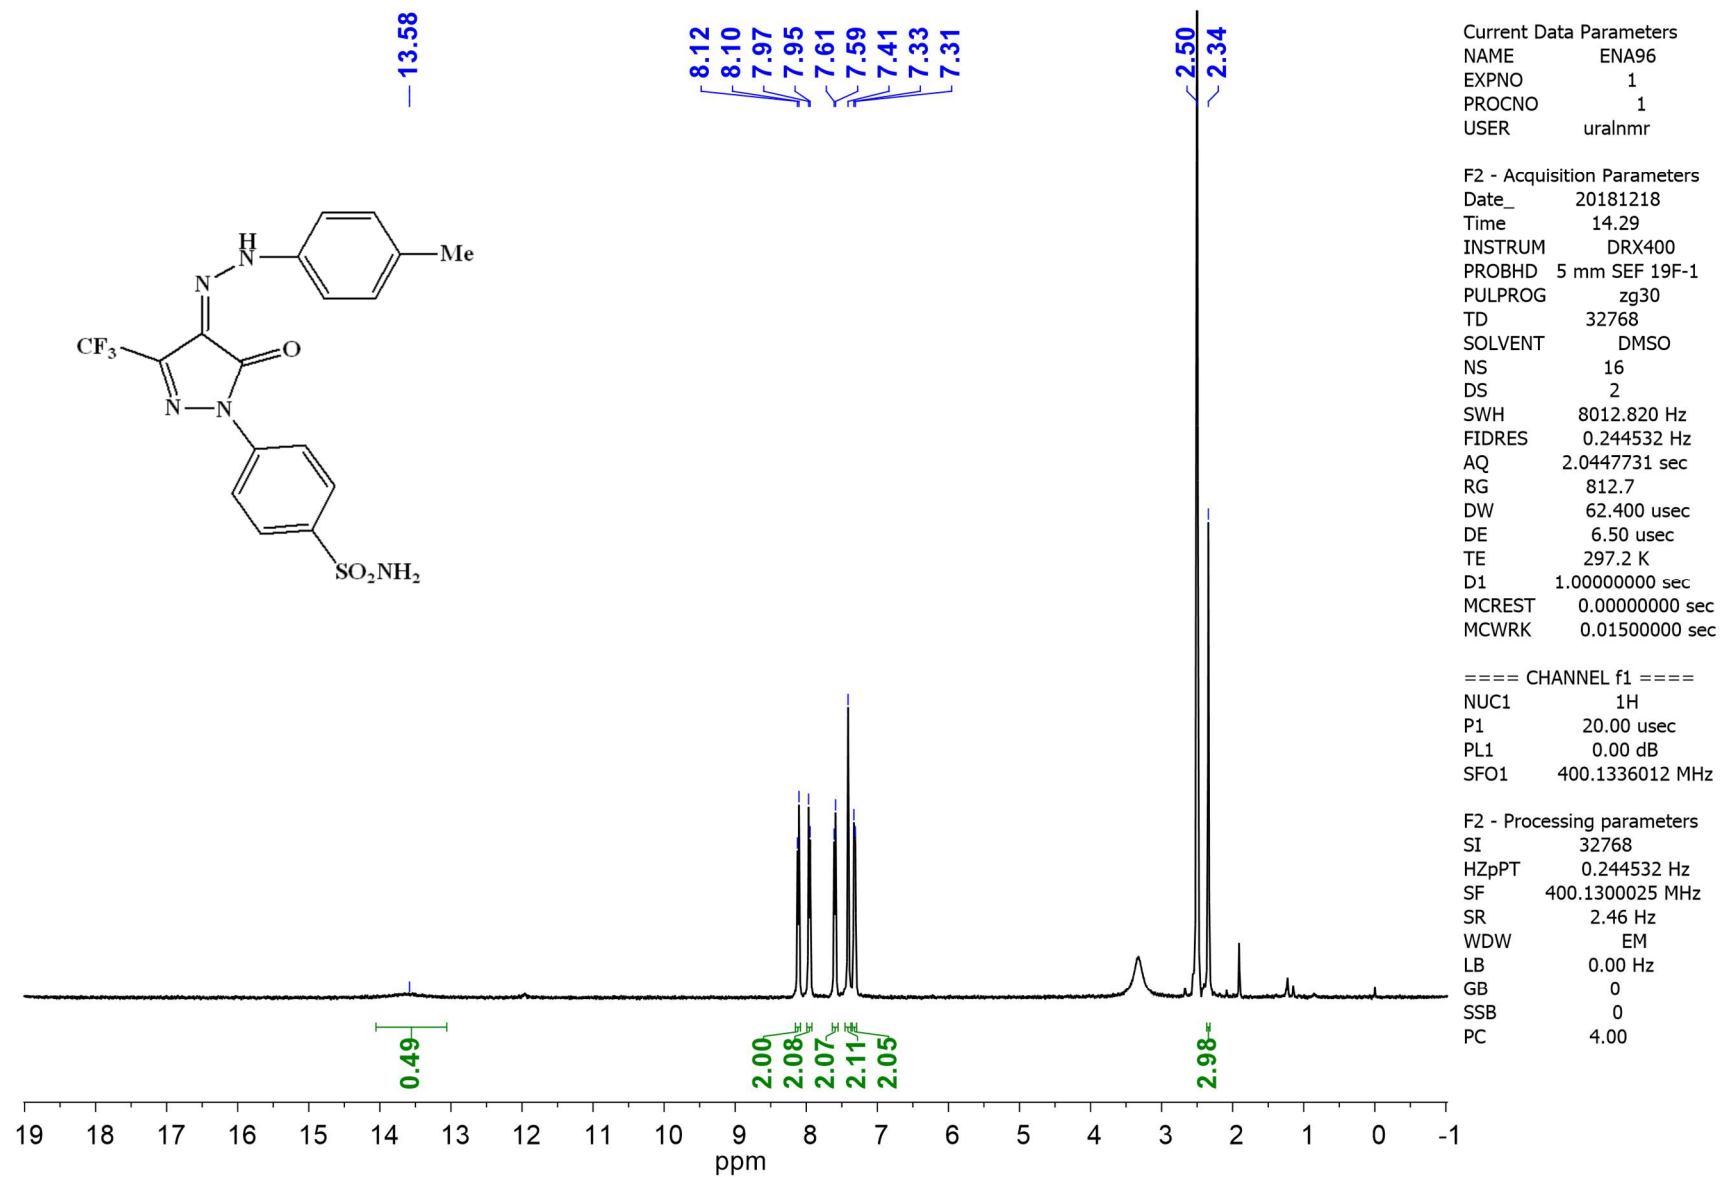



Figure S46.  $^{13}\text{C}$  NMR spectrum of compound **5p**

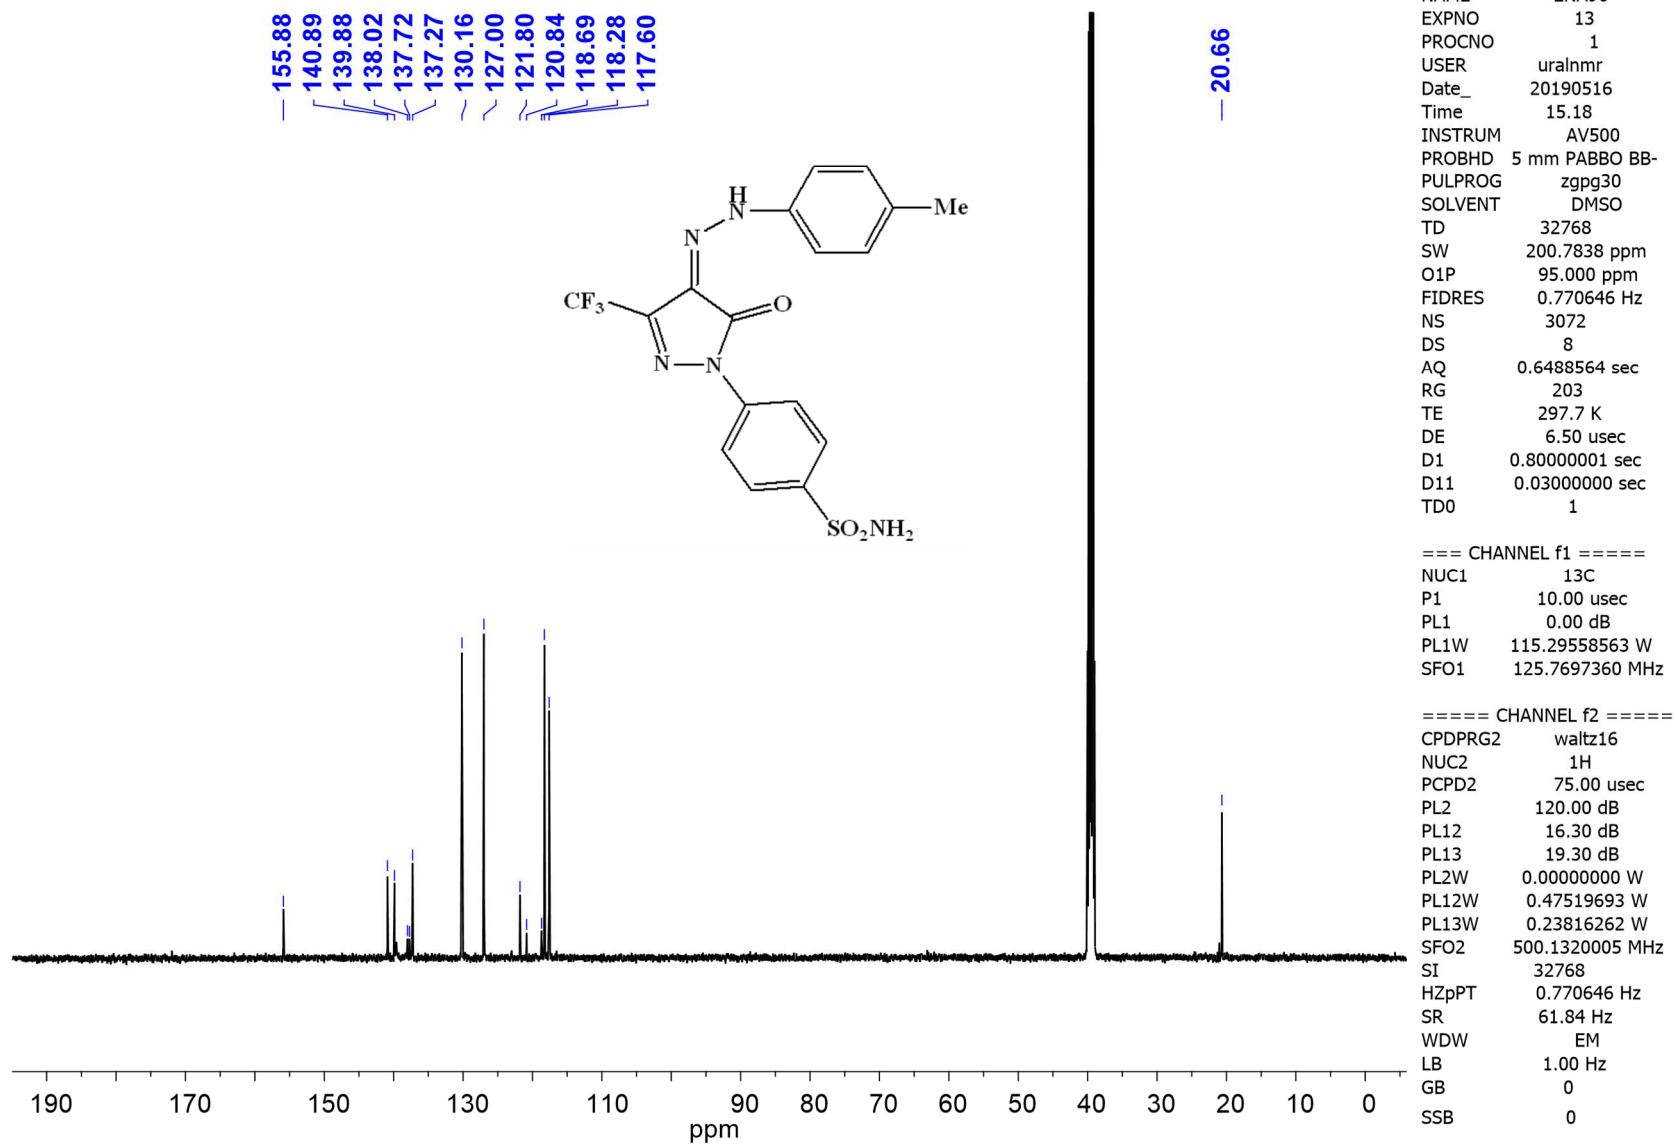

Figure S47.  $^{19}\text{F}$  NMR spectrum of compound **5p**

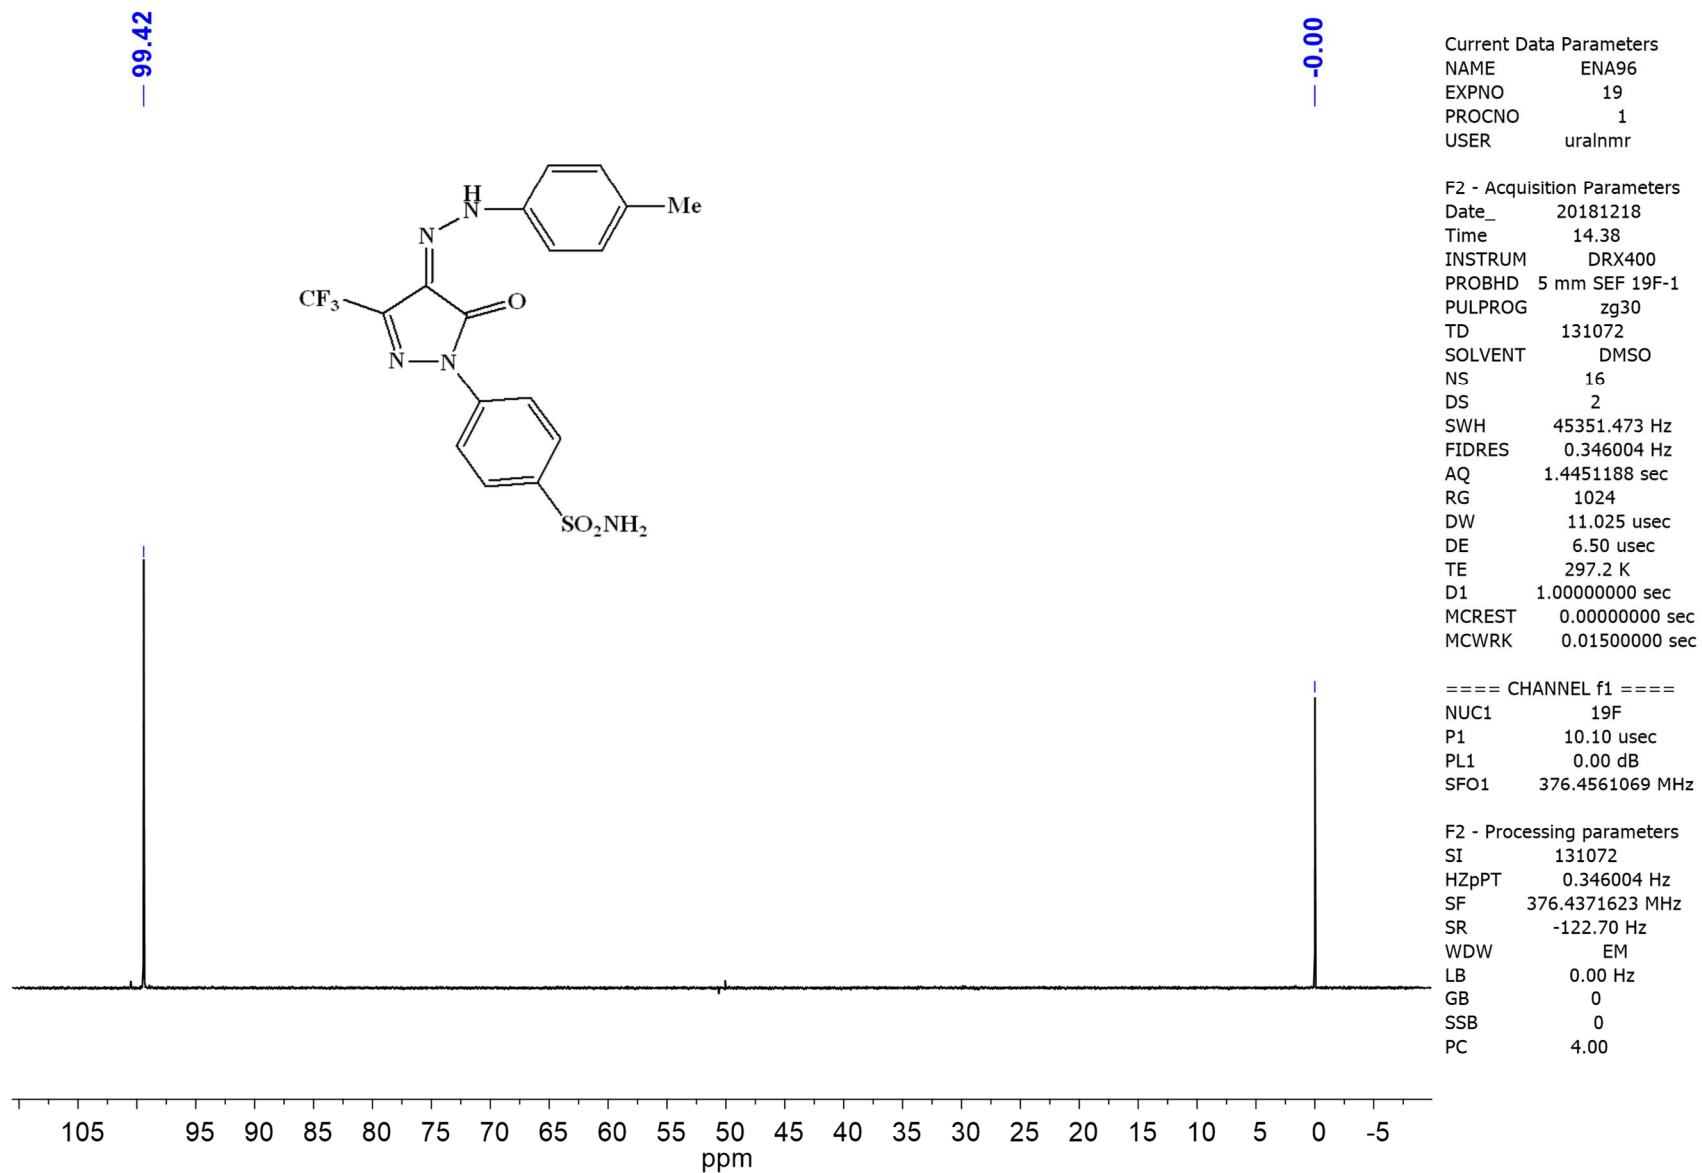

Figure S48. <sup>1</sup>H NMR spectrum of compound 5q

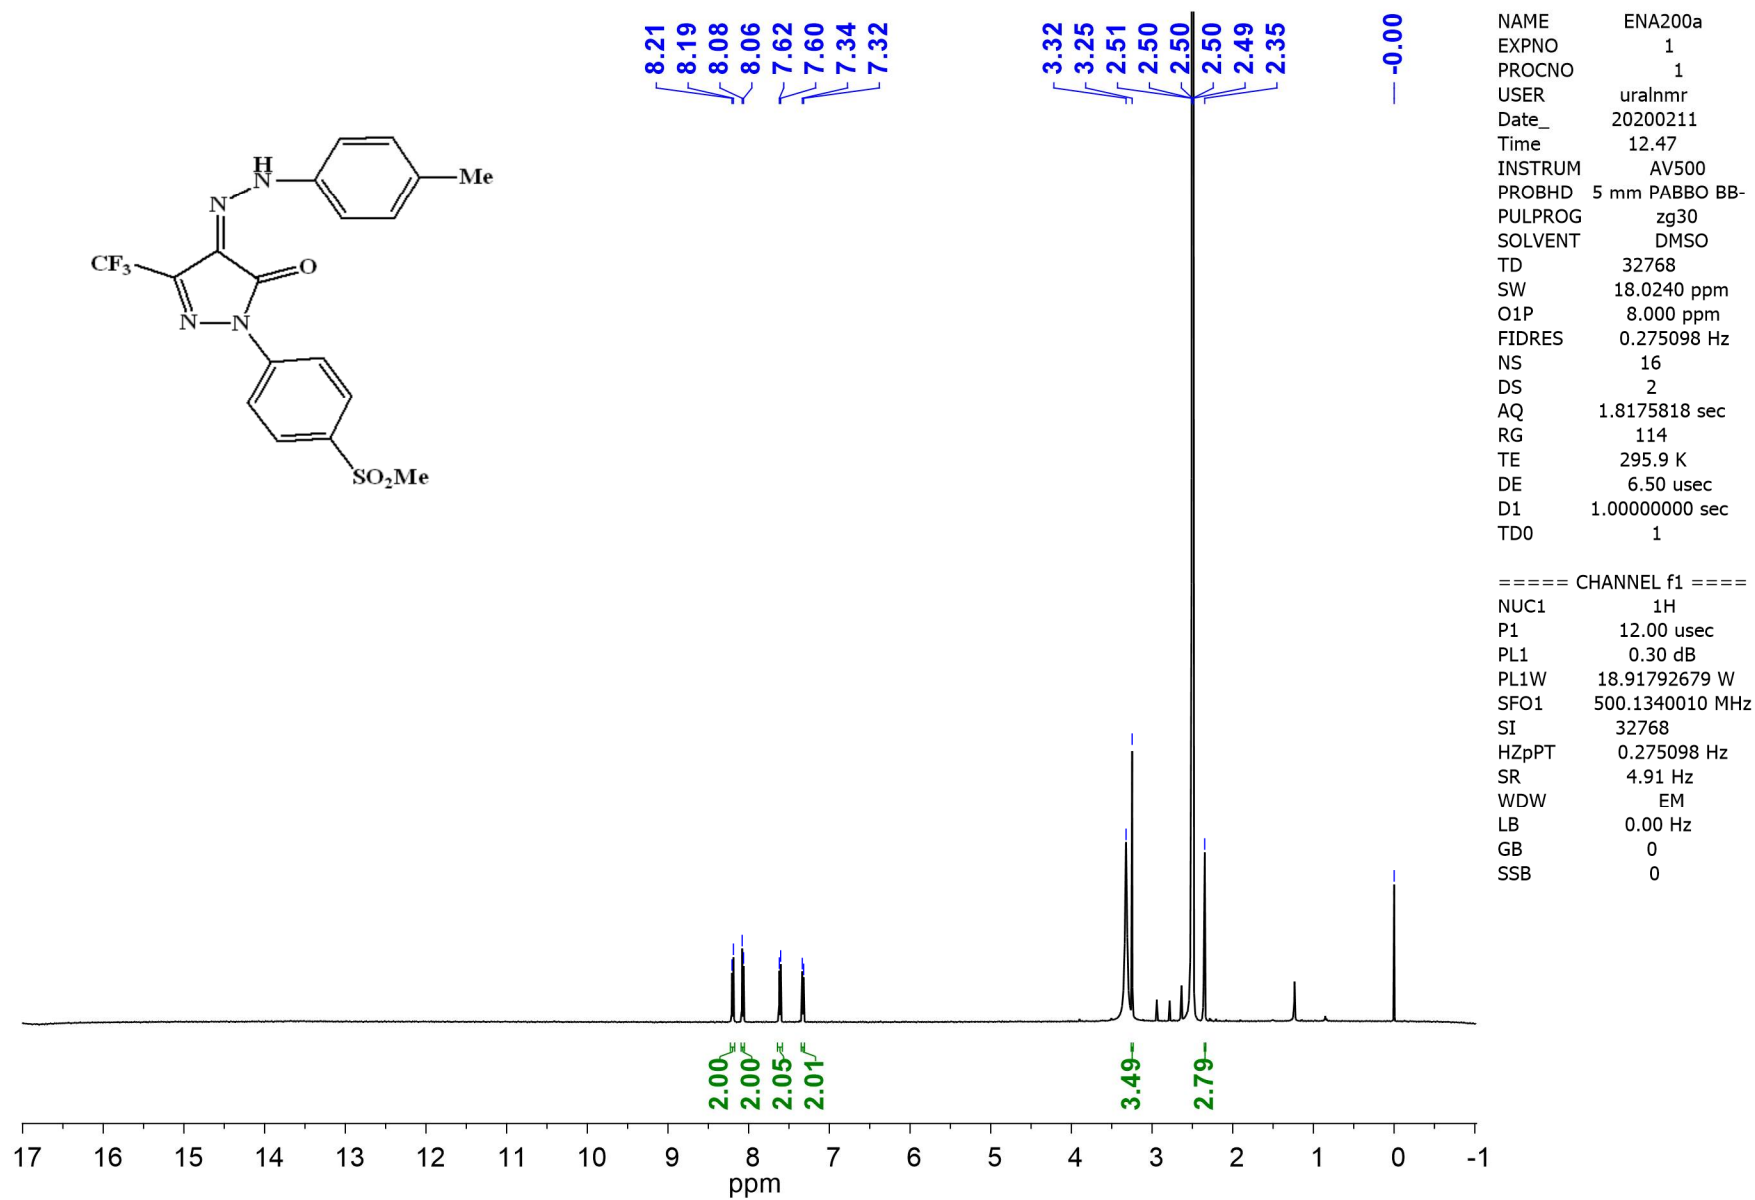

Figure S49.  $^{19}\text{F}$  NMR spectrum of compound **5q**

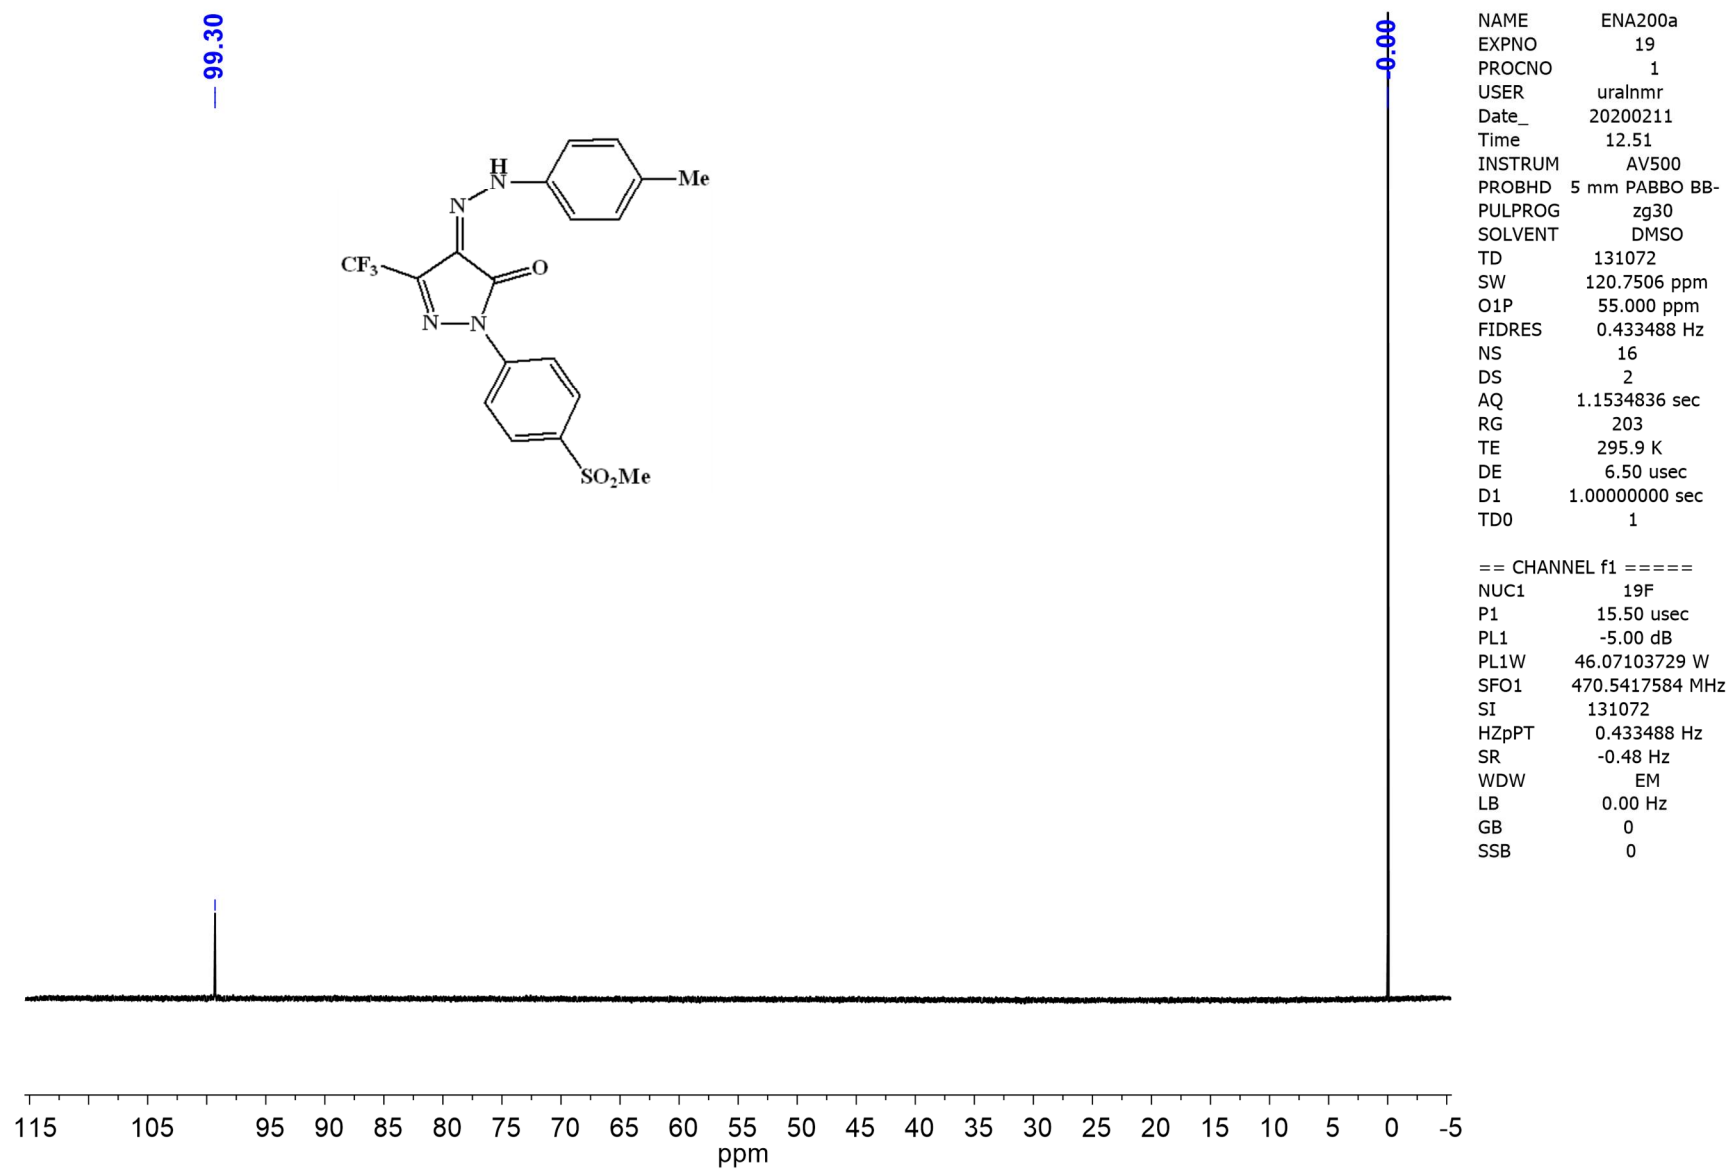

Figure S50. <sup>1</sup>H NMR spectrum of compound **5r**

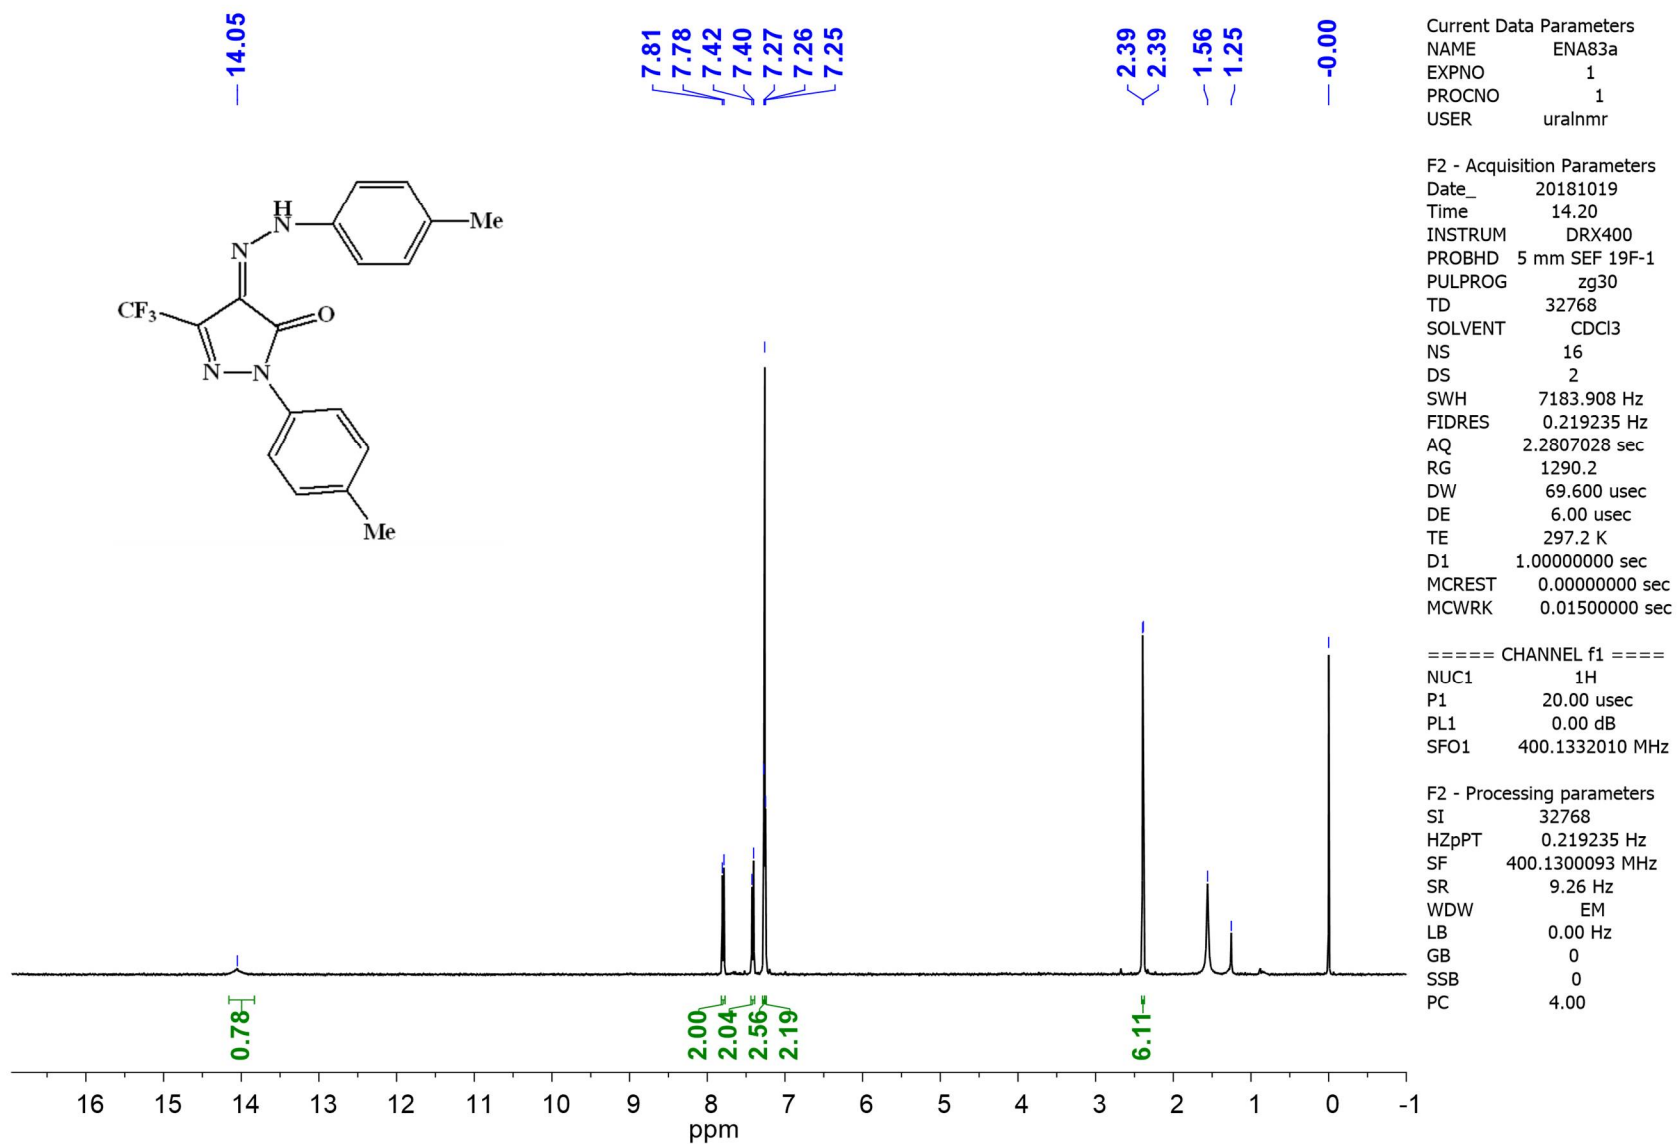

Figure S51.  $^{13}\text{C}$  NMR spectrum of compound **5r**

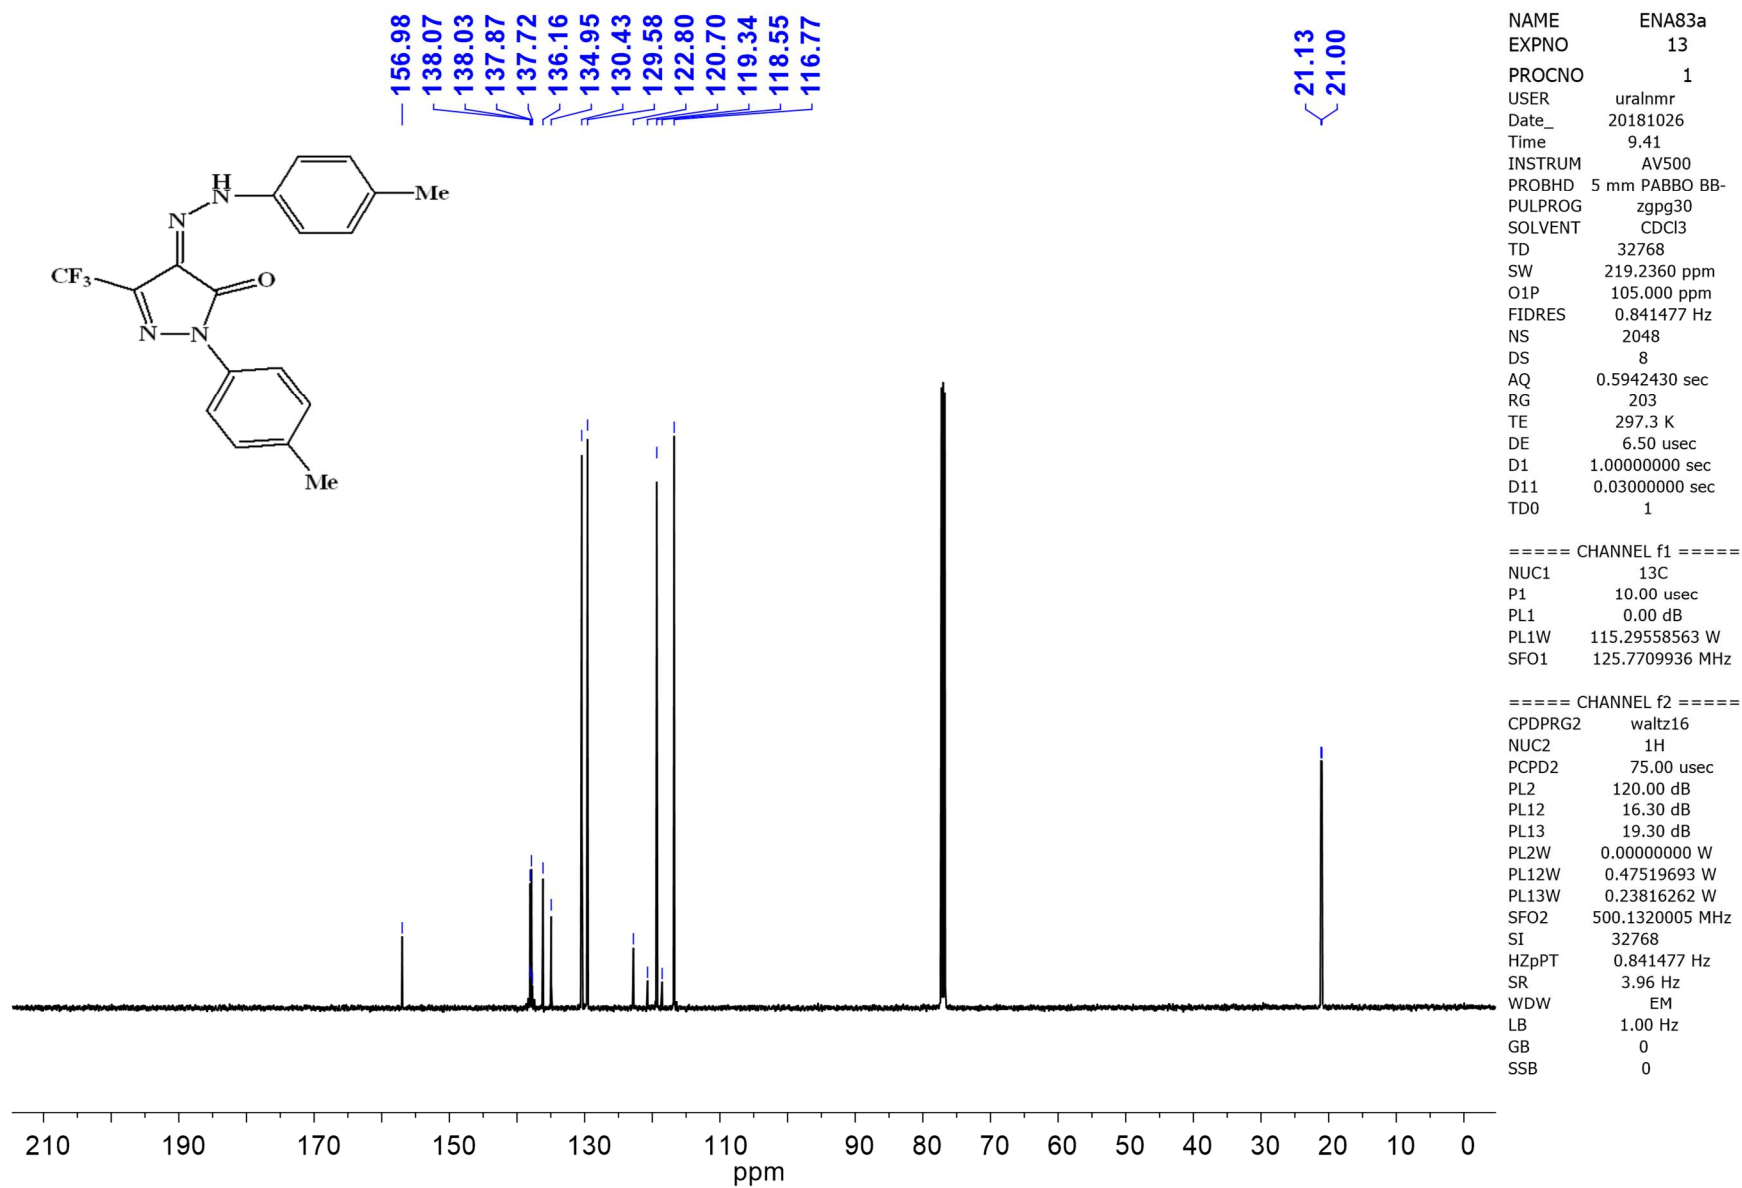

Figure S52.  $^{19}\text{F}$  NMR spectrum of compound **5r**

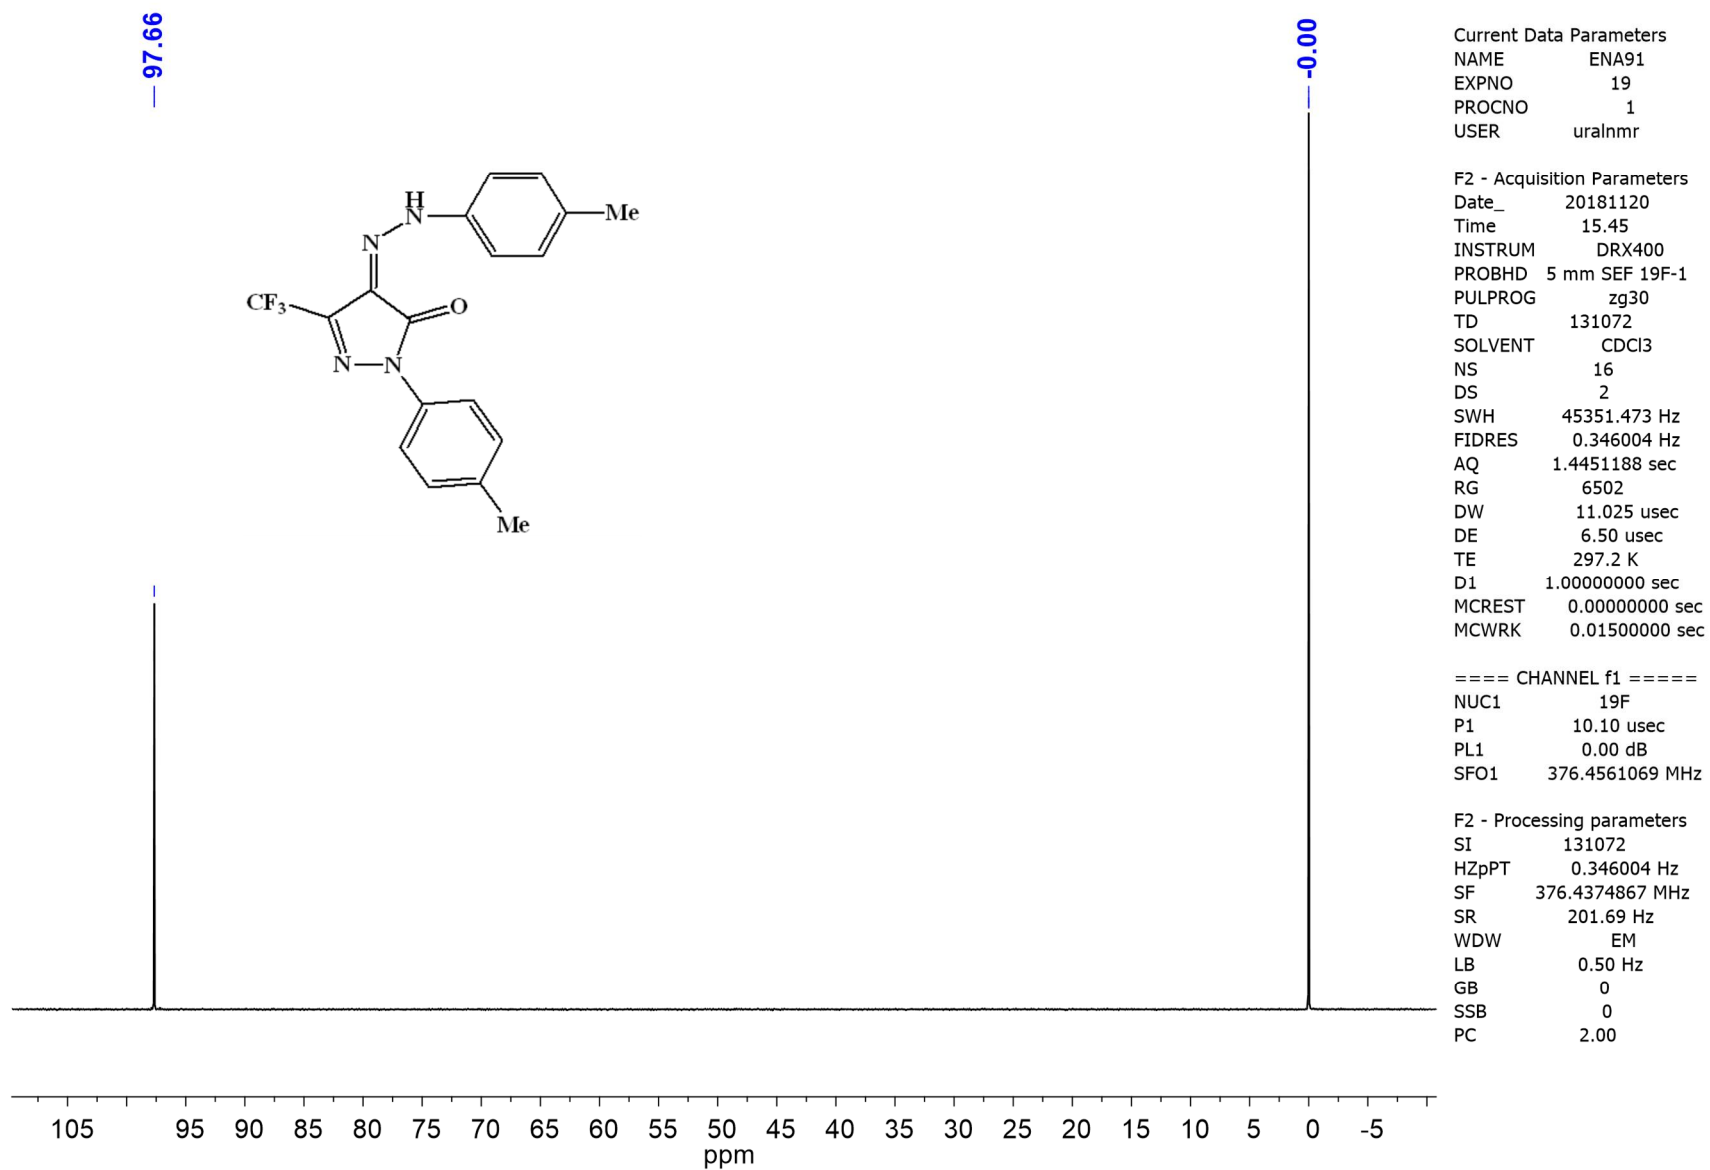

Figure S53. <sup>1</sup>H NMR spectrum of compound **6a**

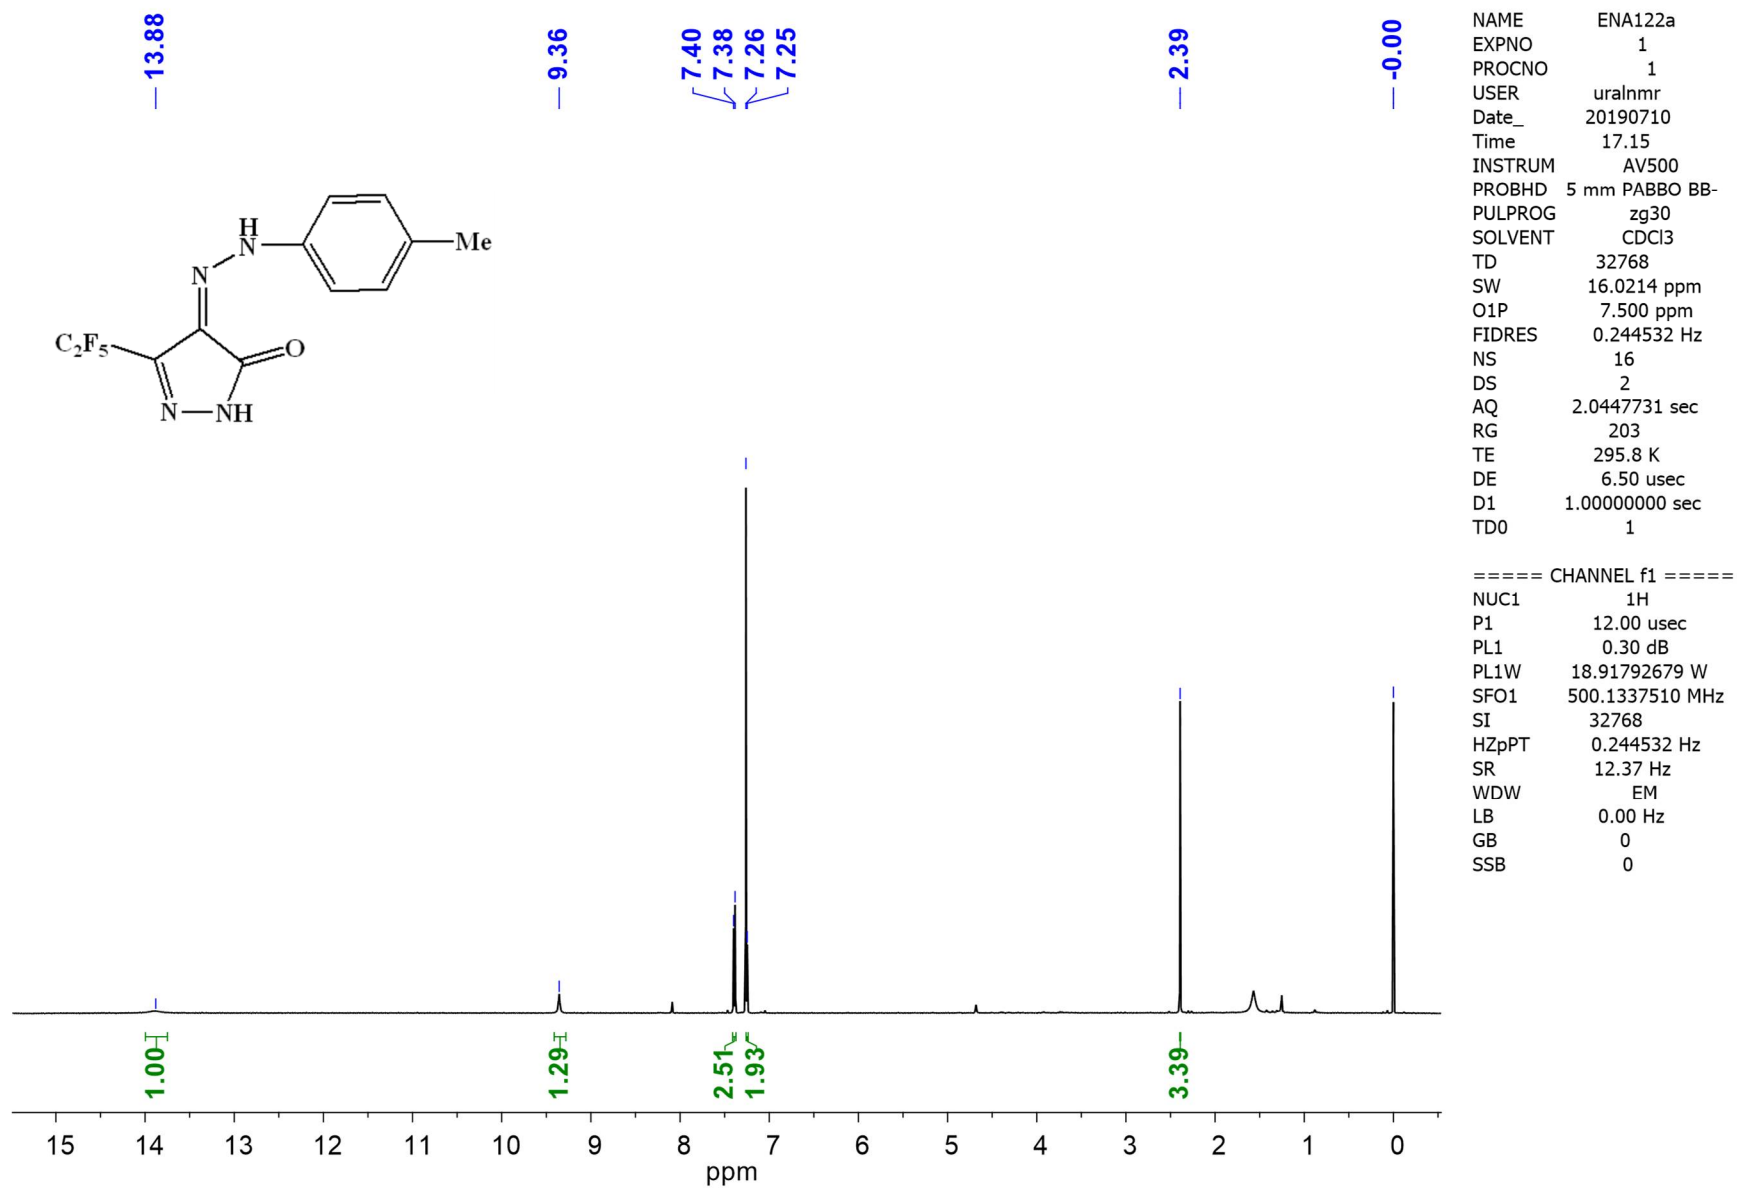



Figure S54.  $^{13}\text{C}$  NMR spectrum of compound **6a**

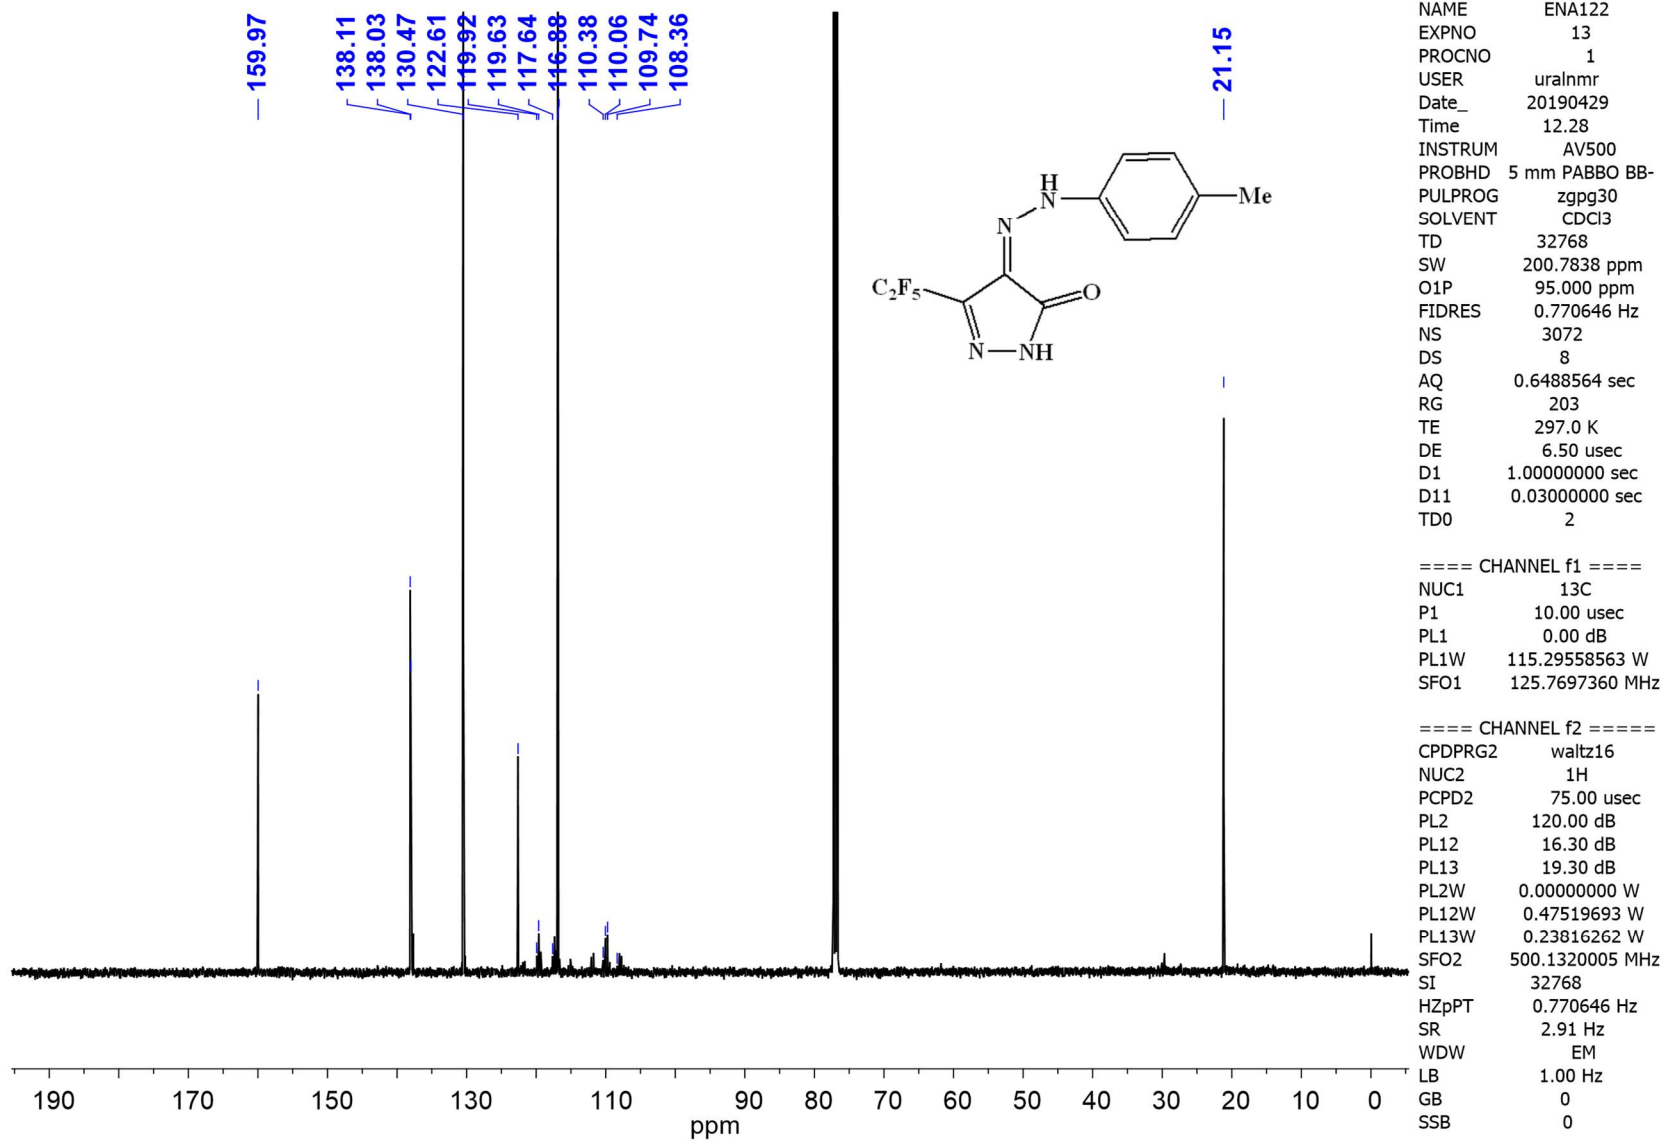

Figure S55.  $^{19}\text{F}$  NMR spectrum of compound **6a**

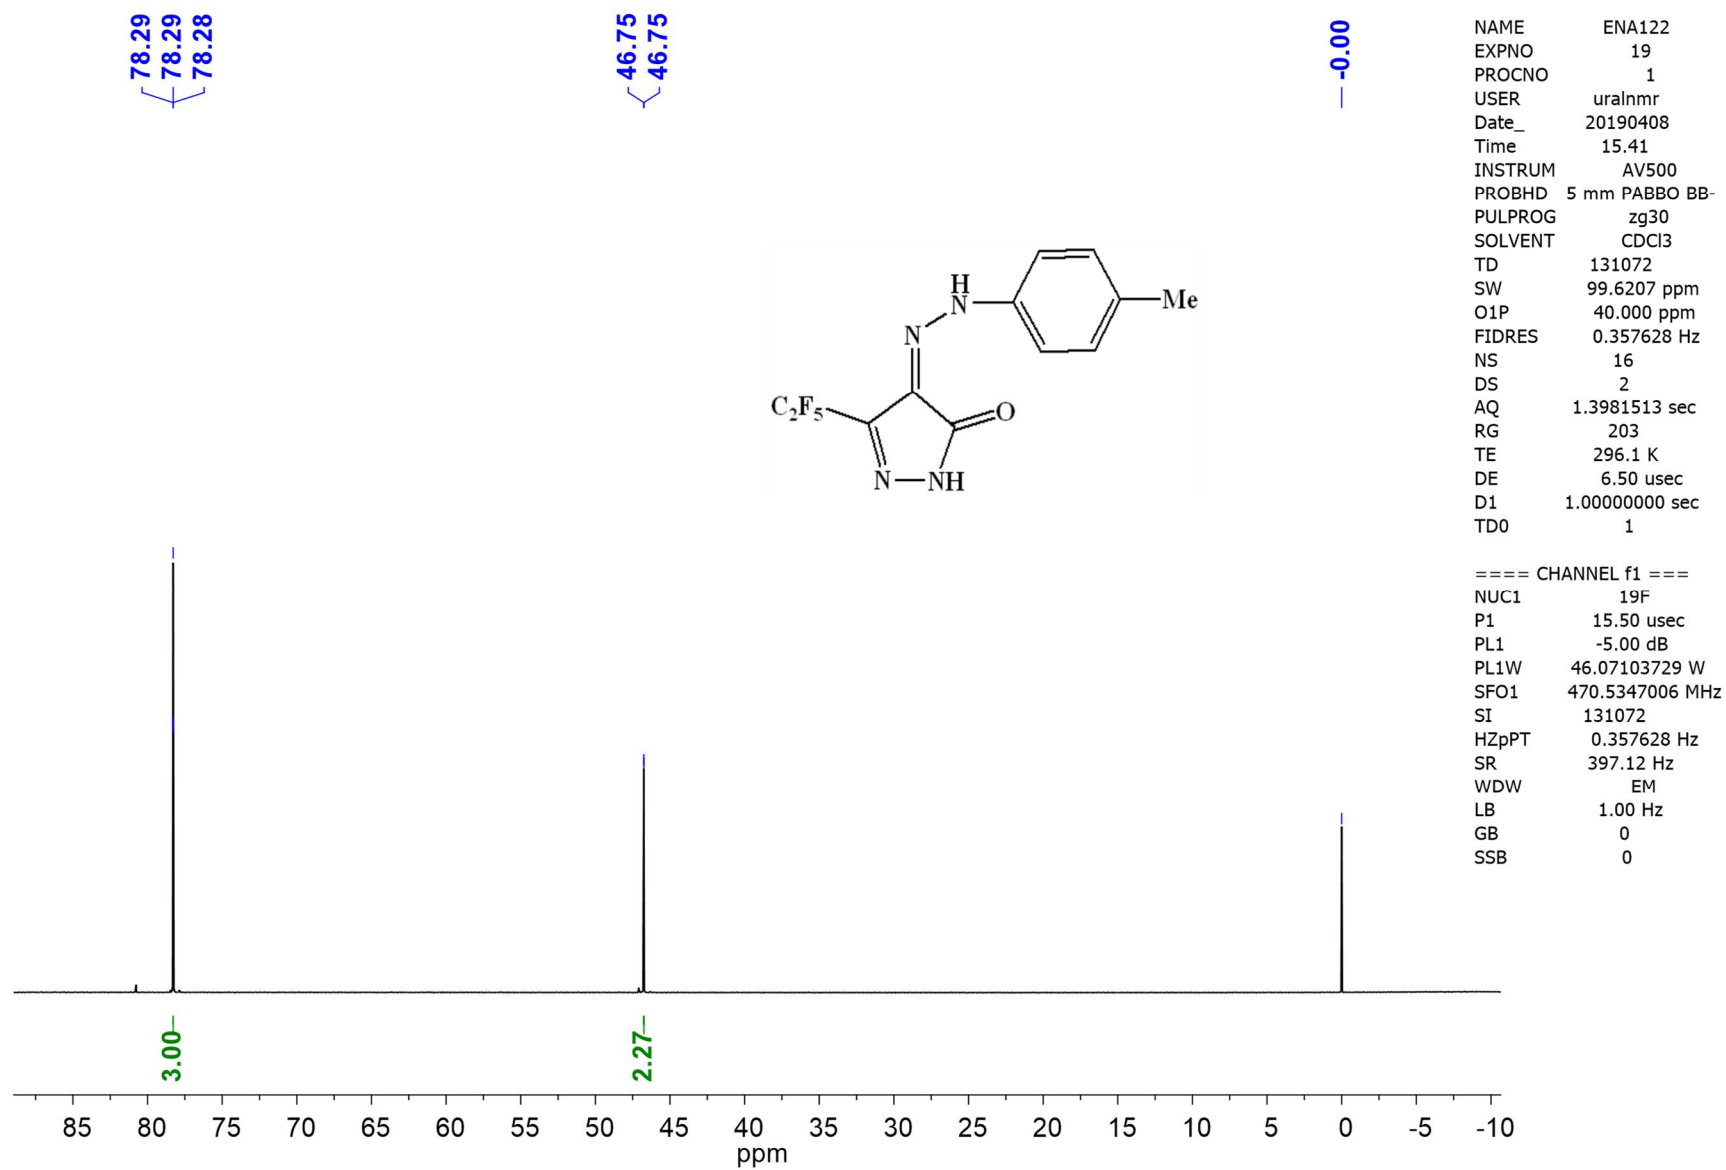

Figure S56. <sup>1</sup>H NMR spectrum of compound **6b**

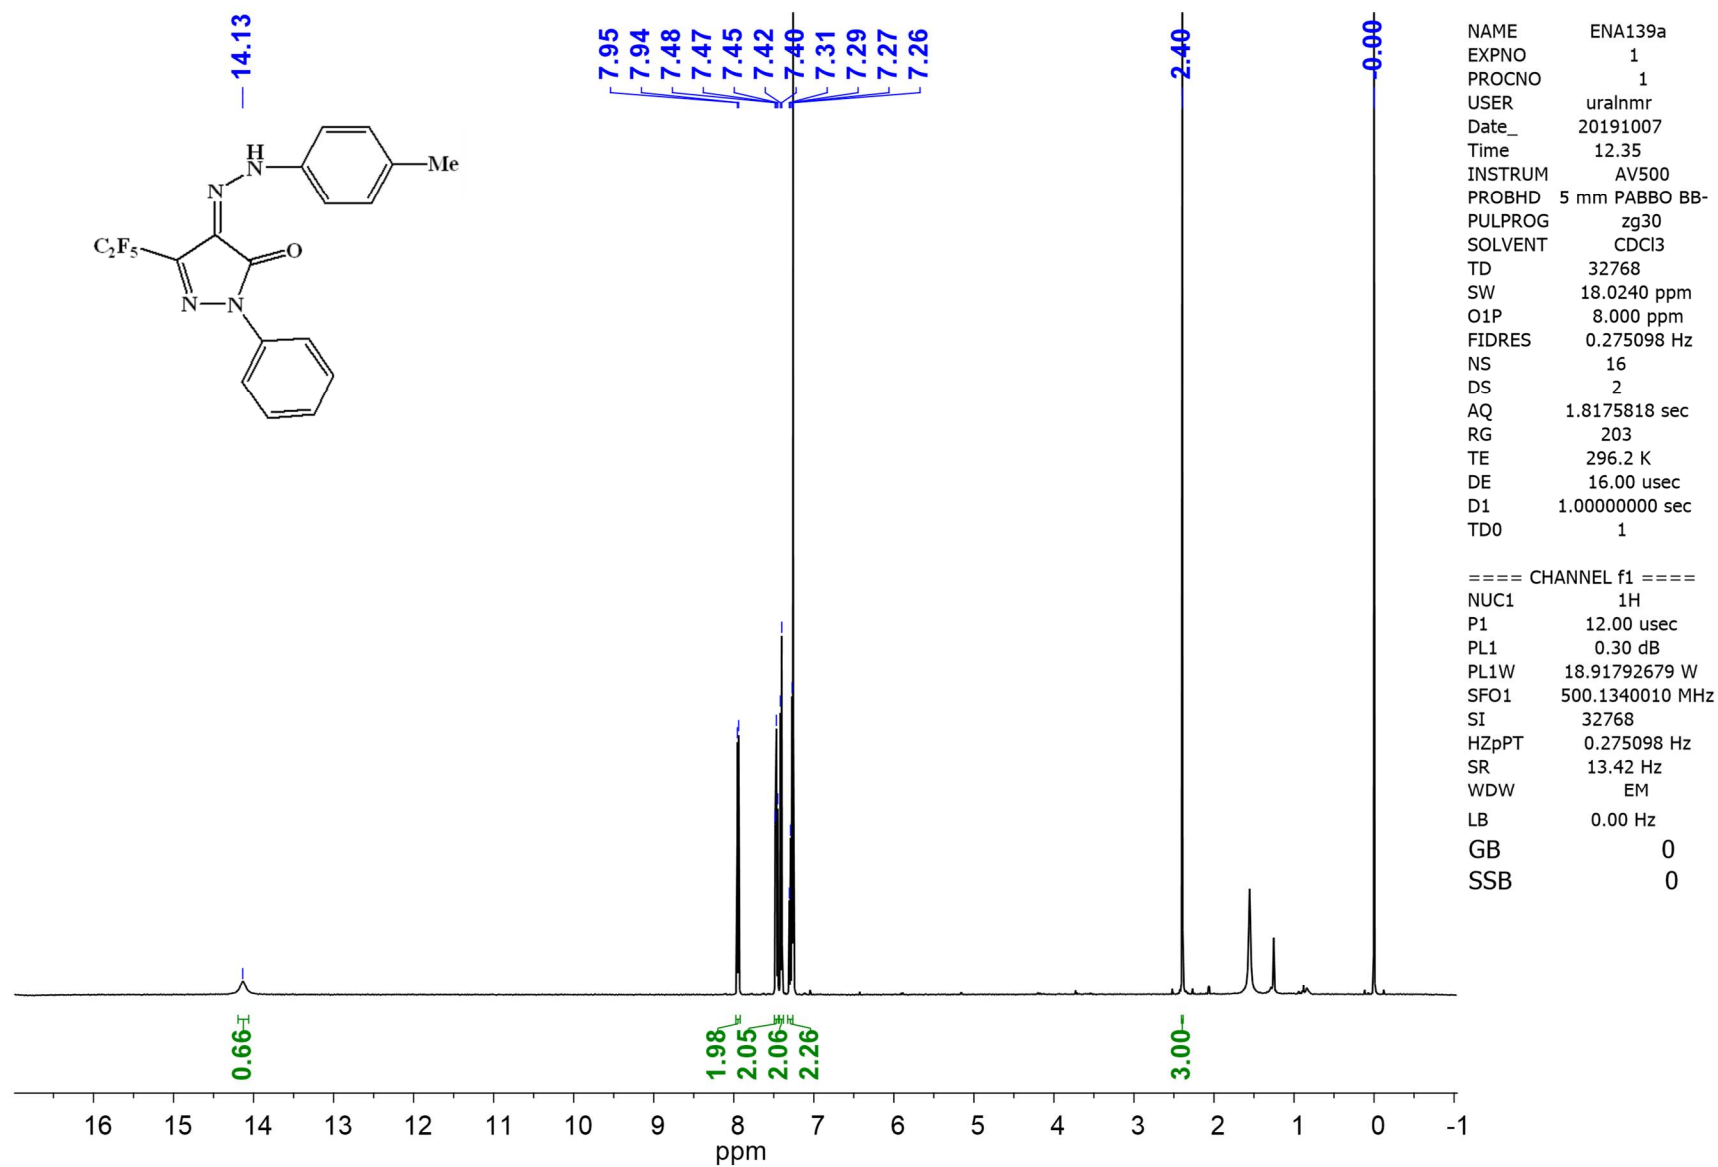

Figure S57.  $^{13}\text{C}$  NMR spectrum of compound **6b**

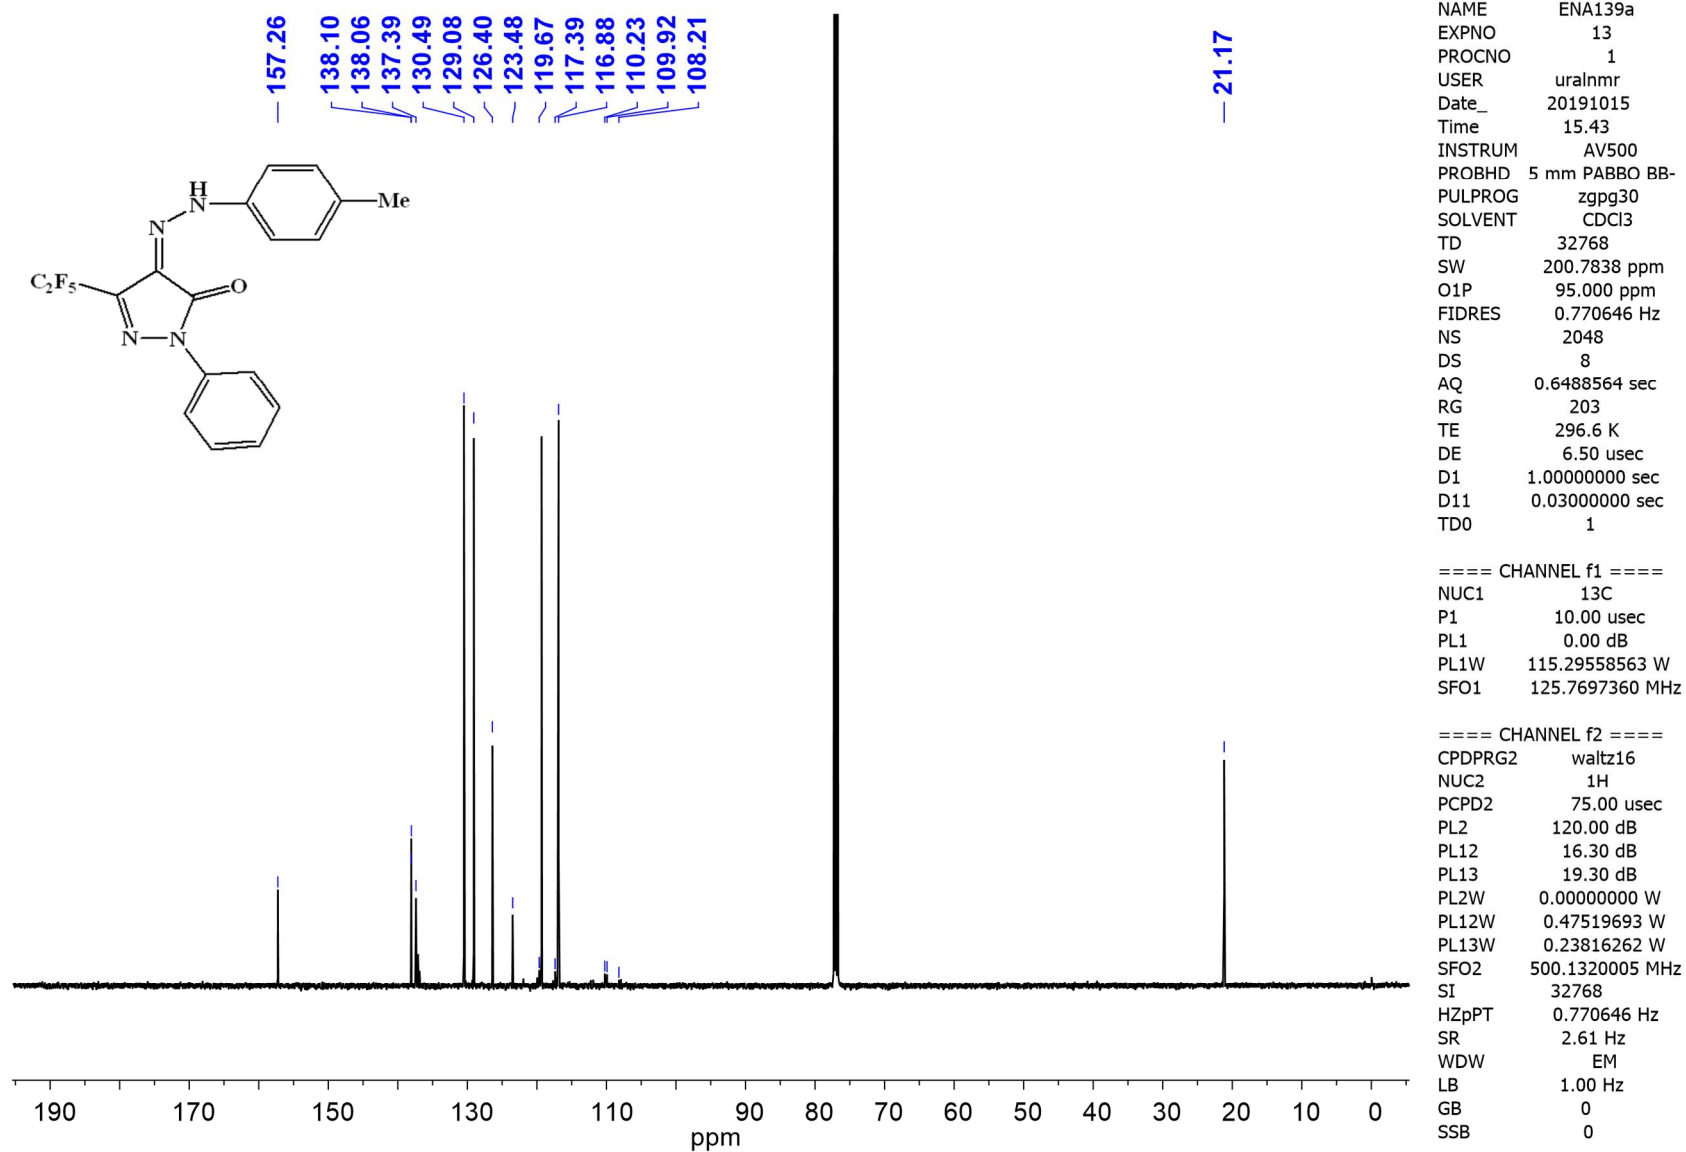

Figure S58.  $^{19}\text{F}$  NMR spectrum of compound **6b**

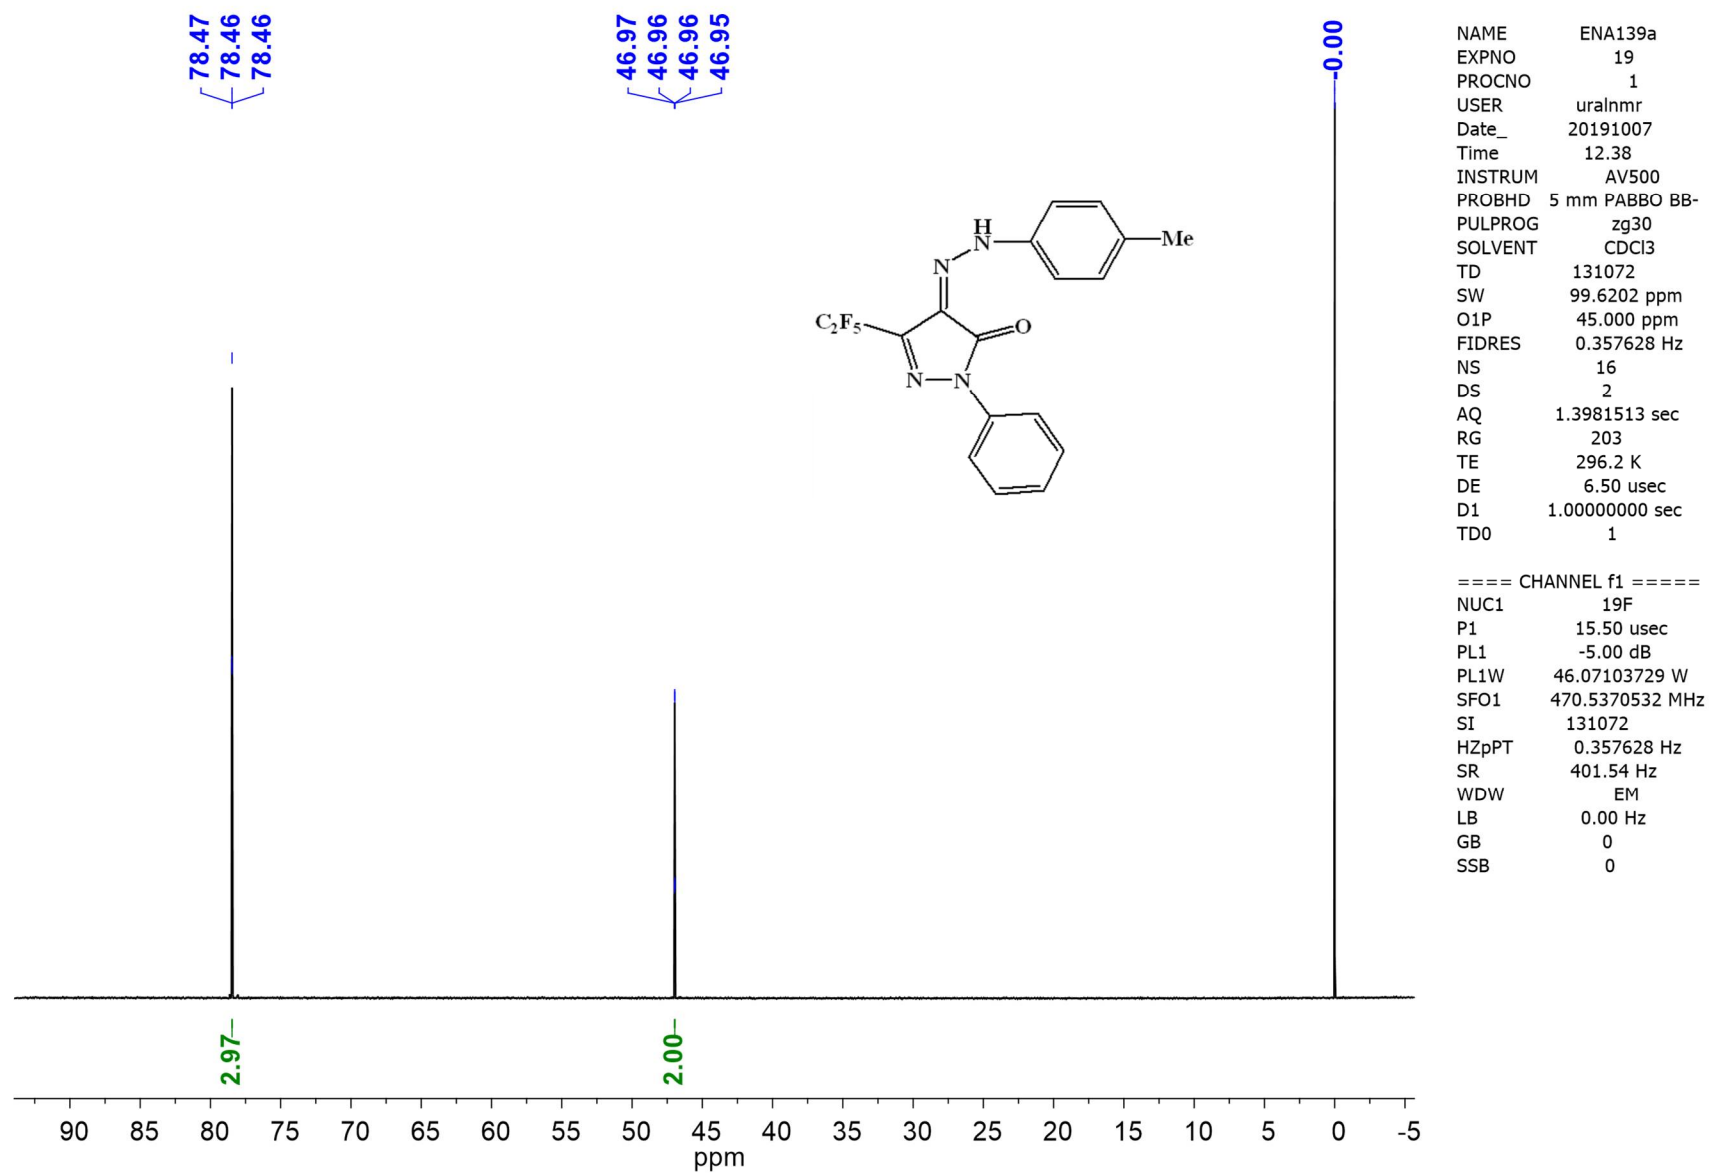

Figure S59. <sup>1</sup>H NMR spectrum of compound 6c

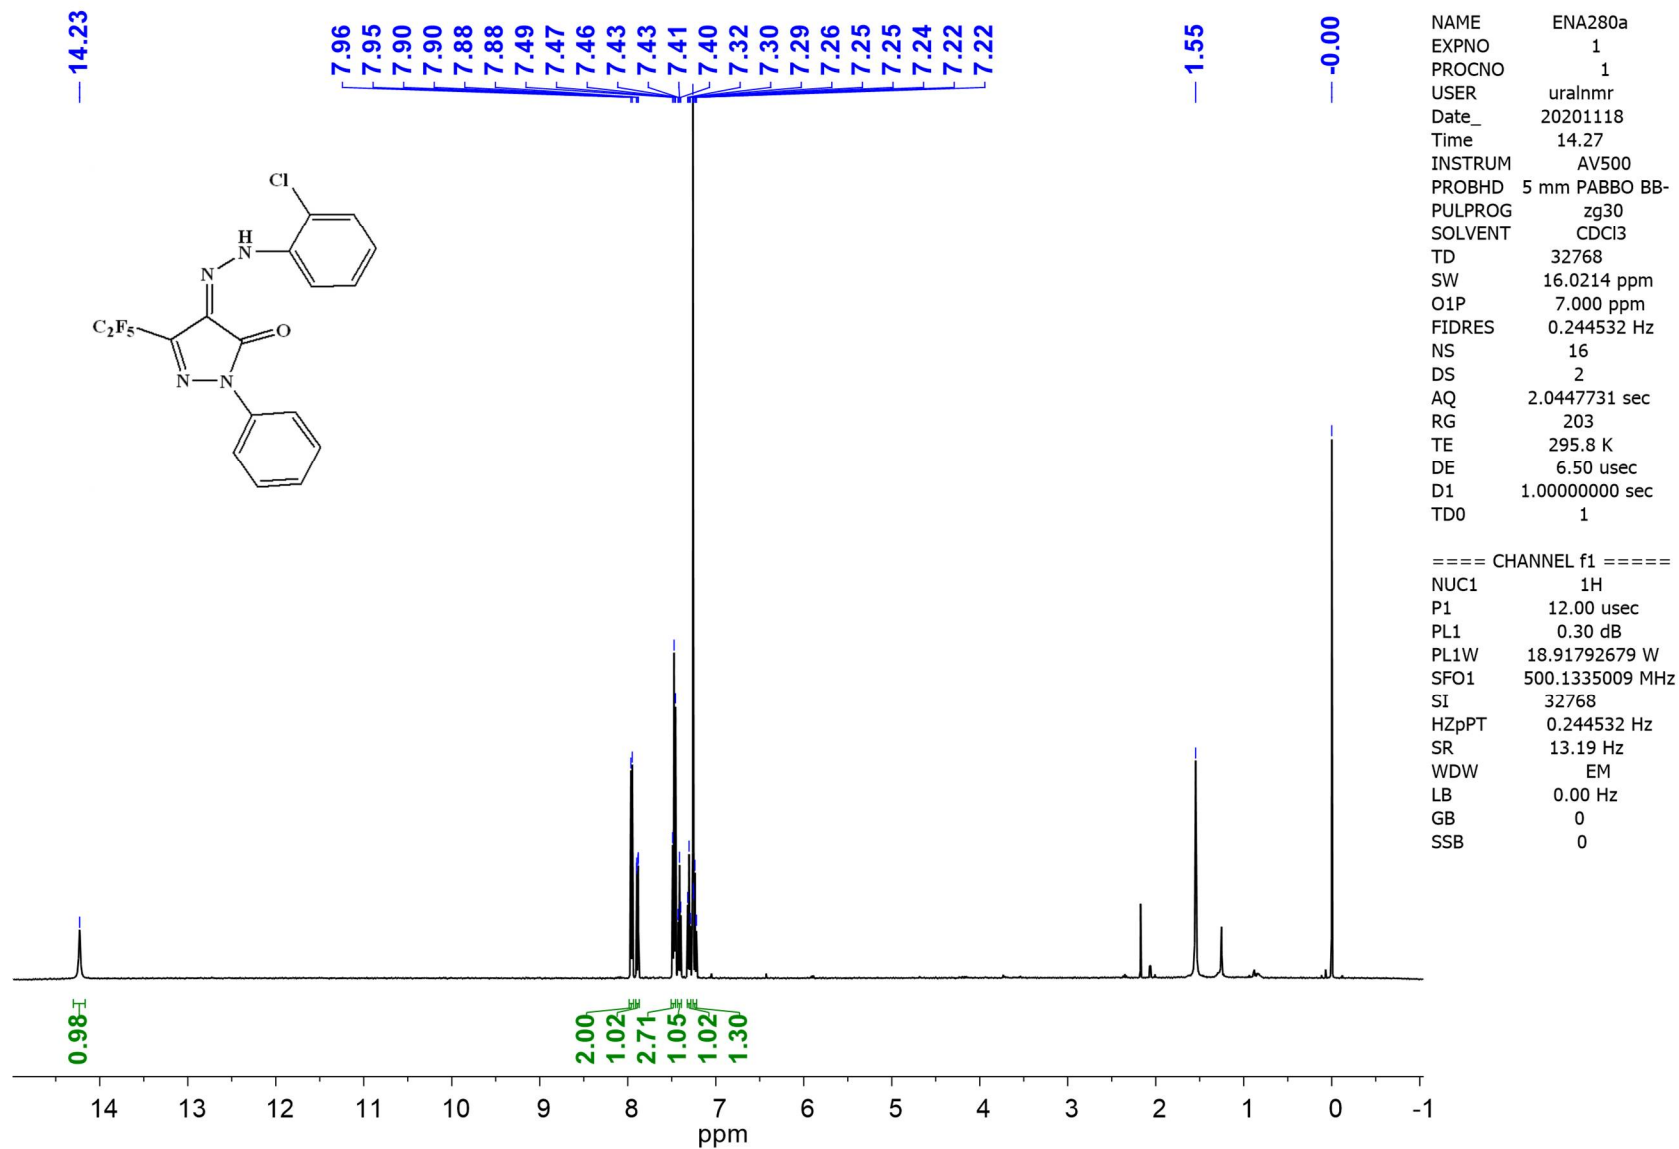

Figure S60.  $^{13}\text{C}$  NMR spectrum of compound **6c**

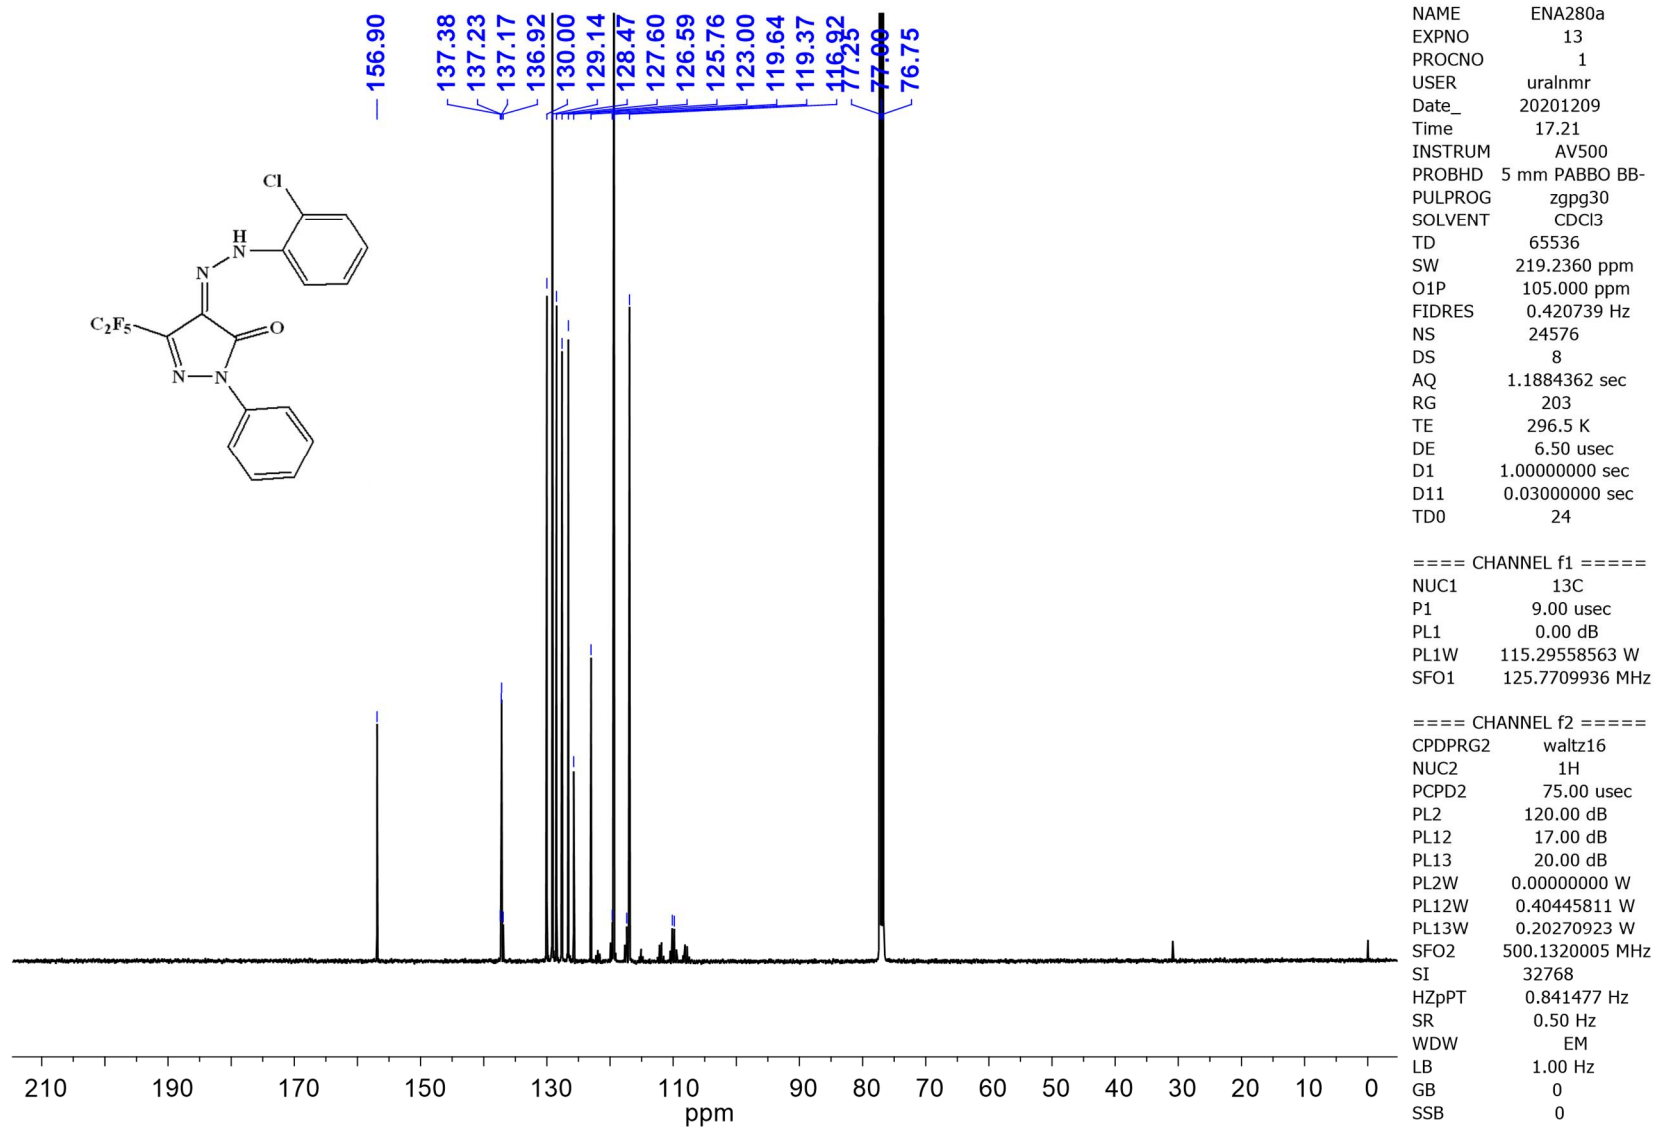

Figure S61.  $^{19}\text{F}$  NMR spectrum of compound **6c**

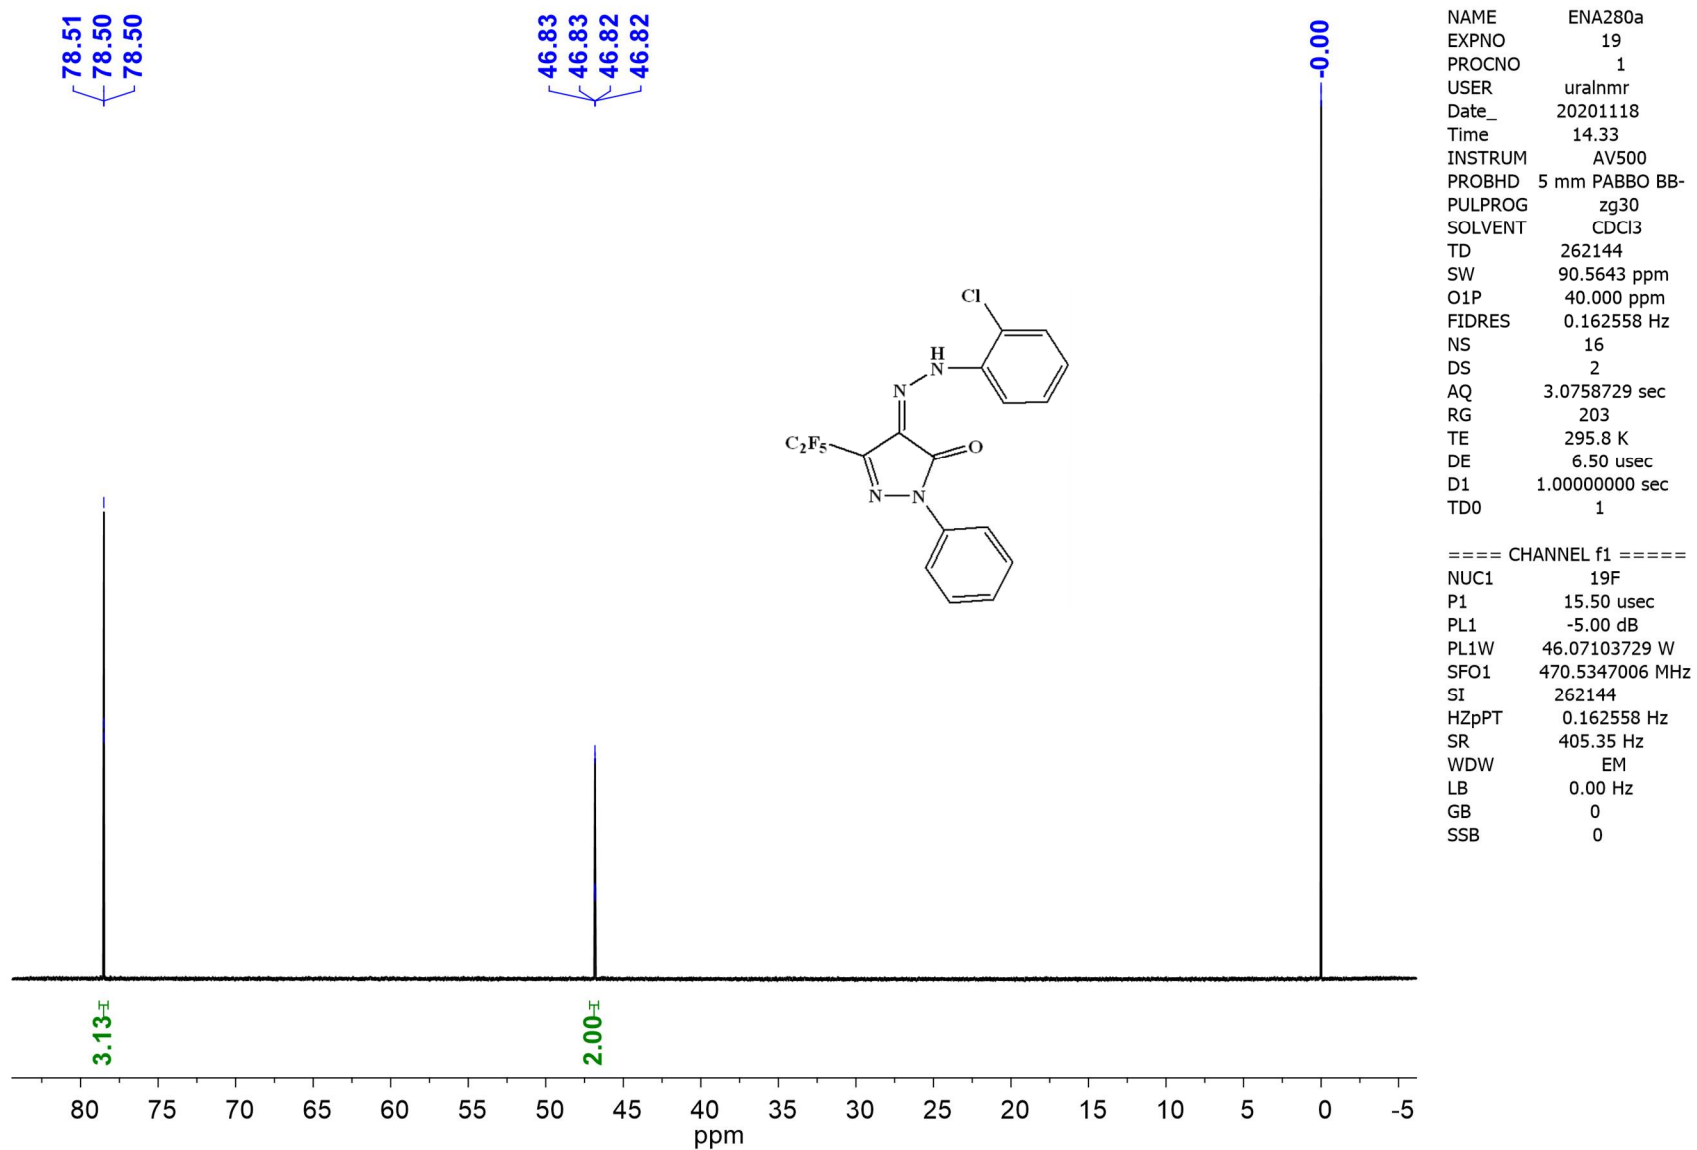



Figure S62. <sup>1</sup>H NMR spectrum of compound **6d**

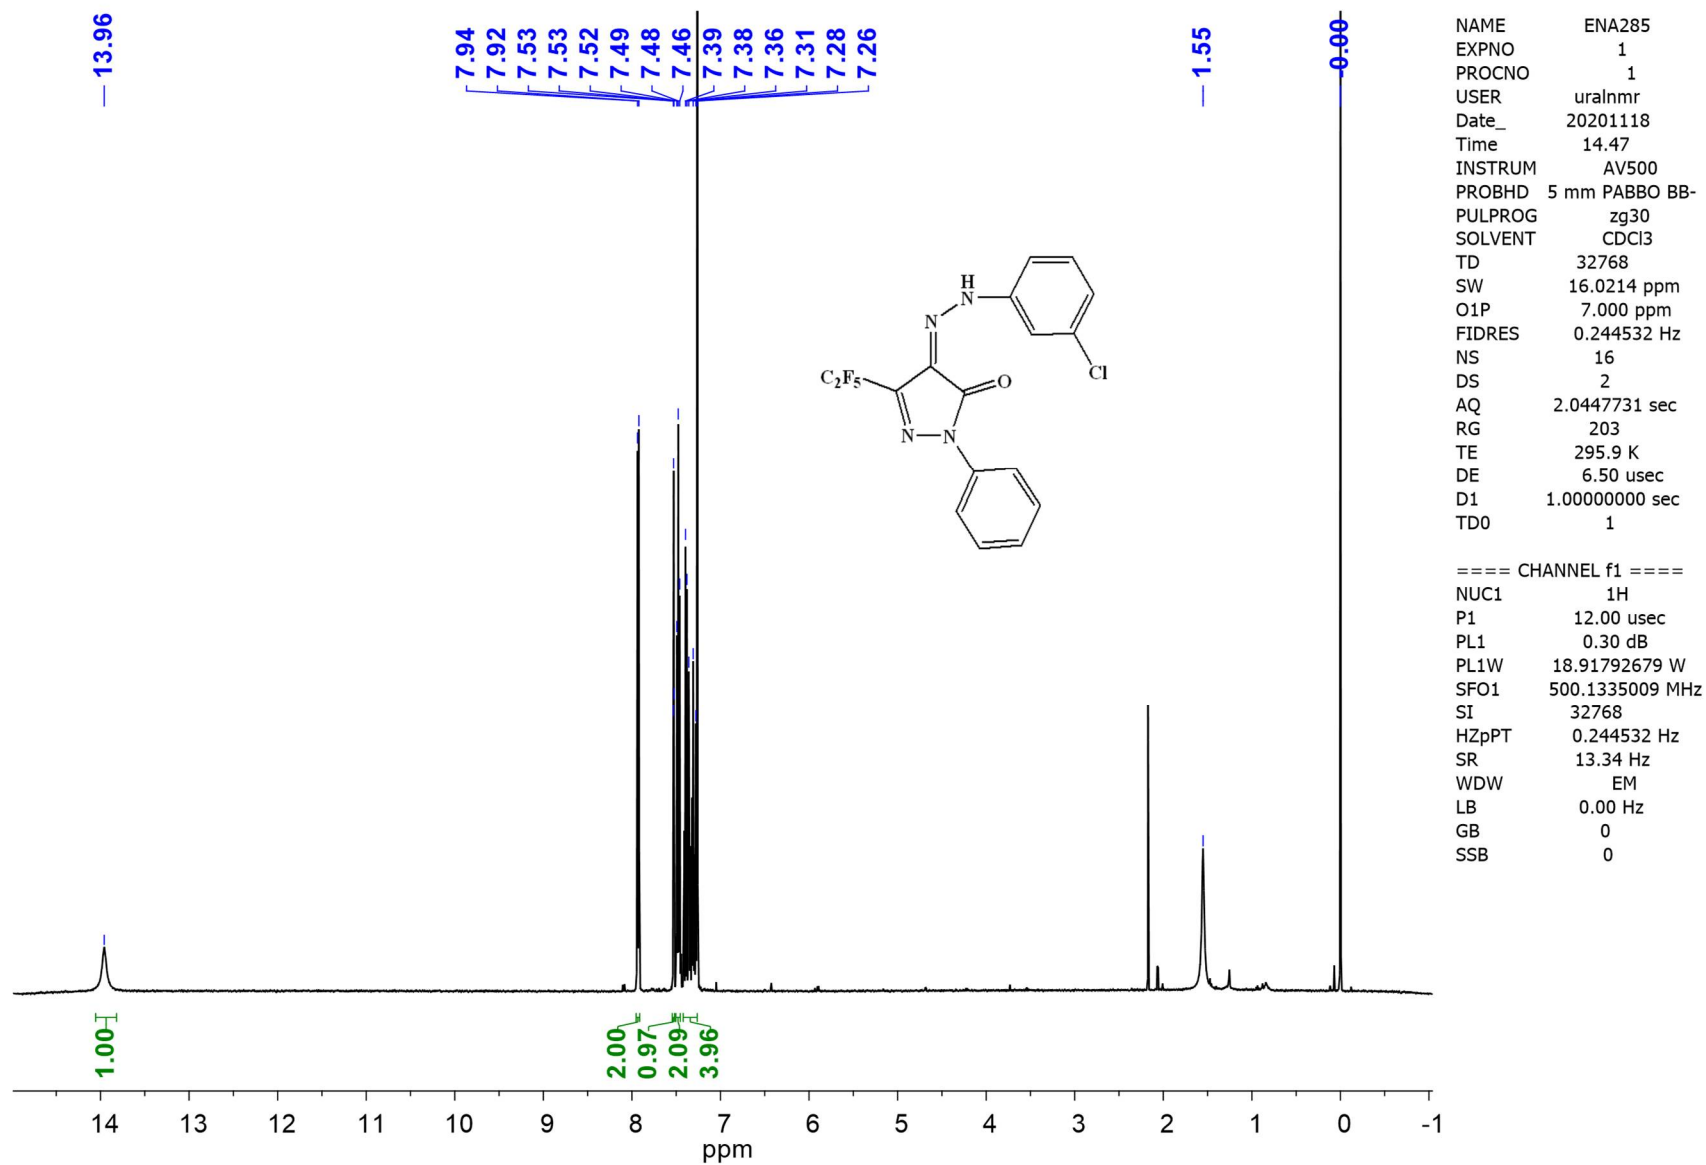

Figure S63.  $^{13}\text{C}$  NMR spectrum of compound **6d**

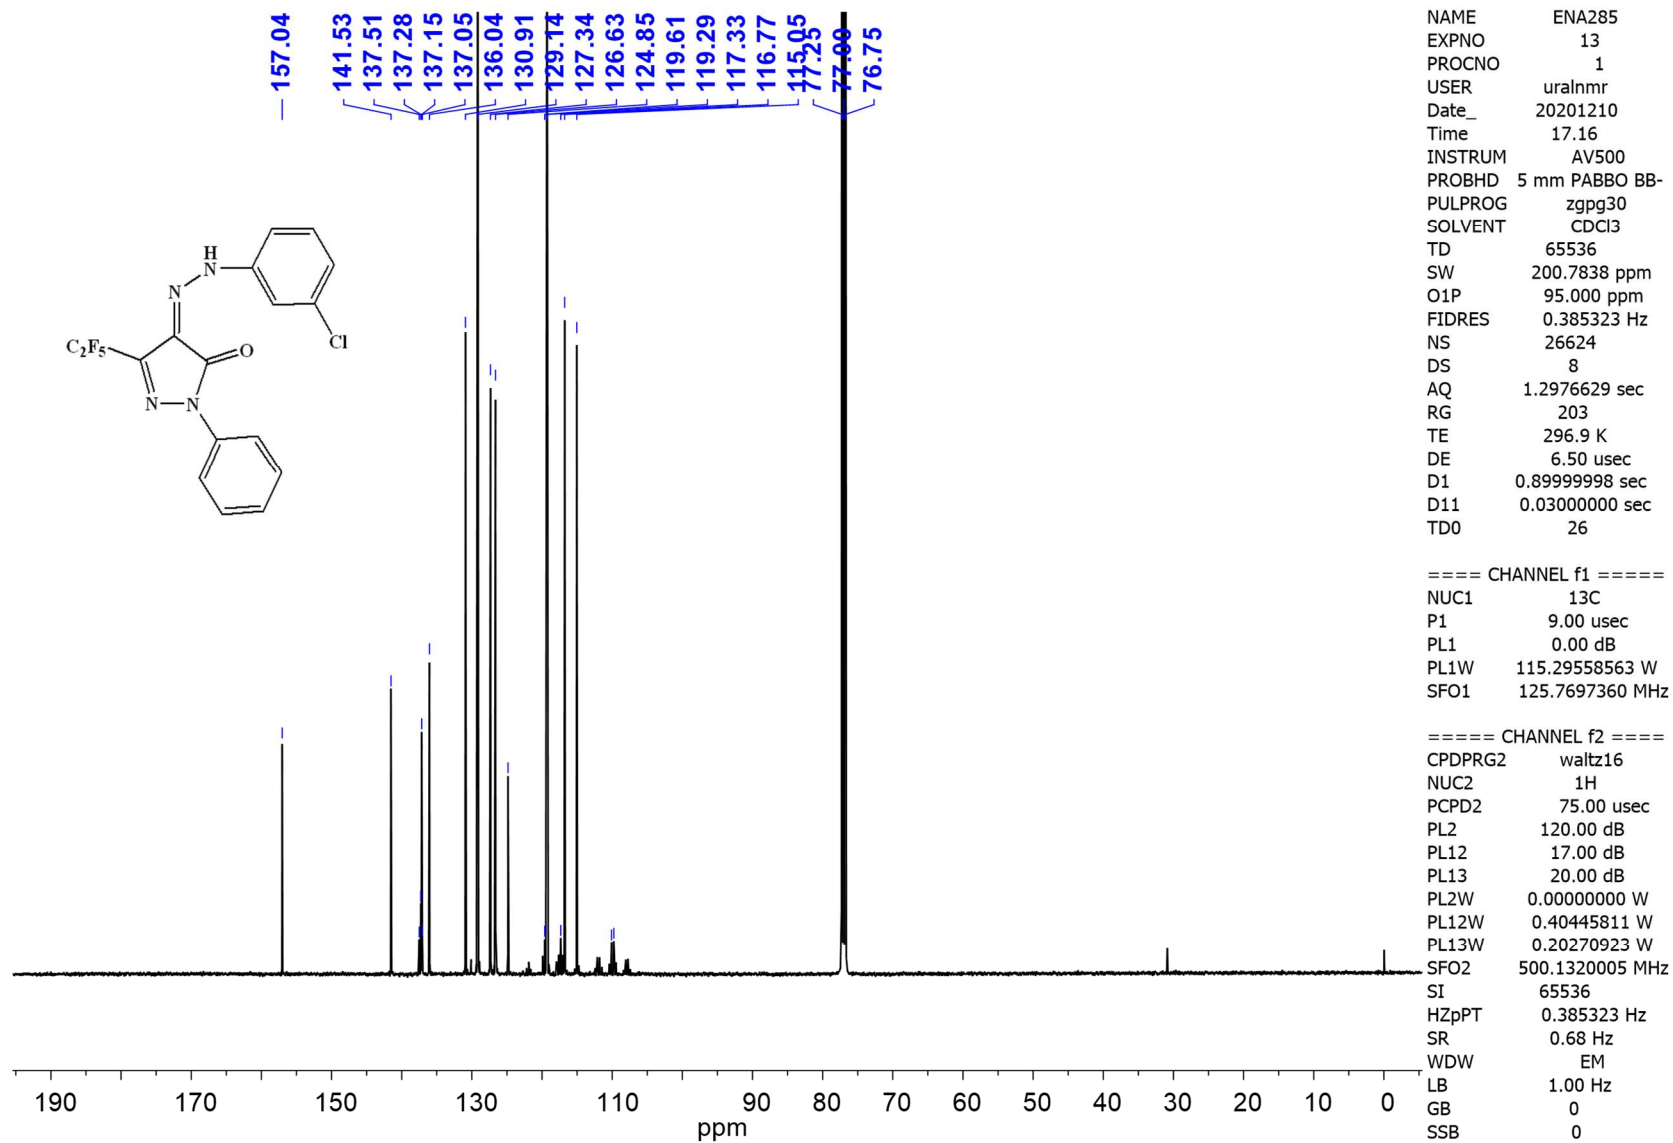

Figure S64.  $^{19}\text{F}$  NMR spectrum of compound **6d**

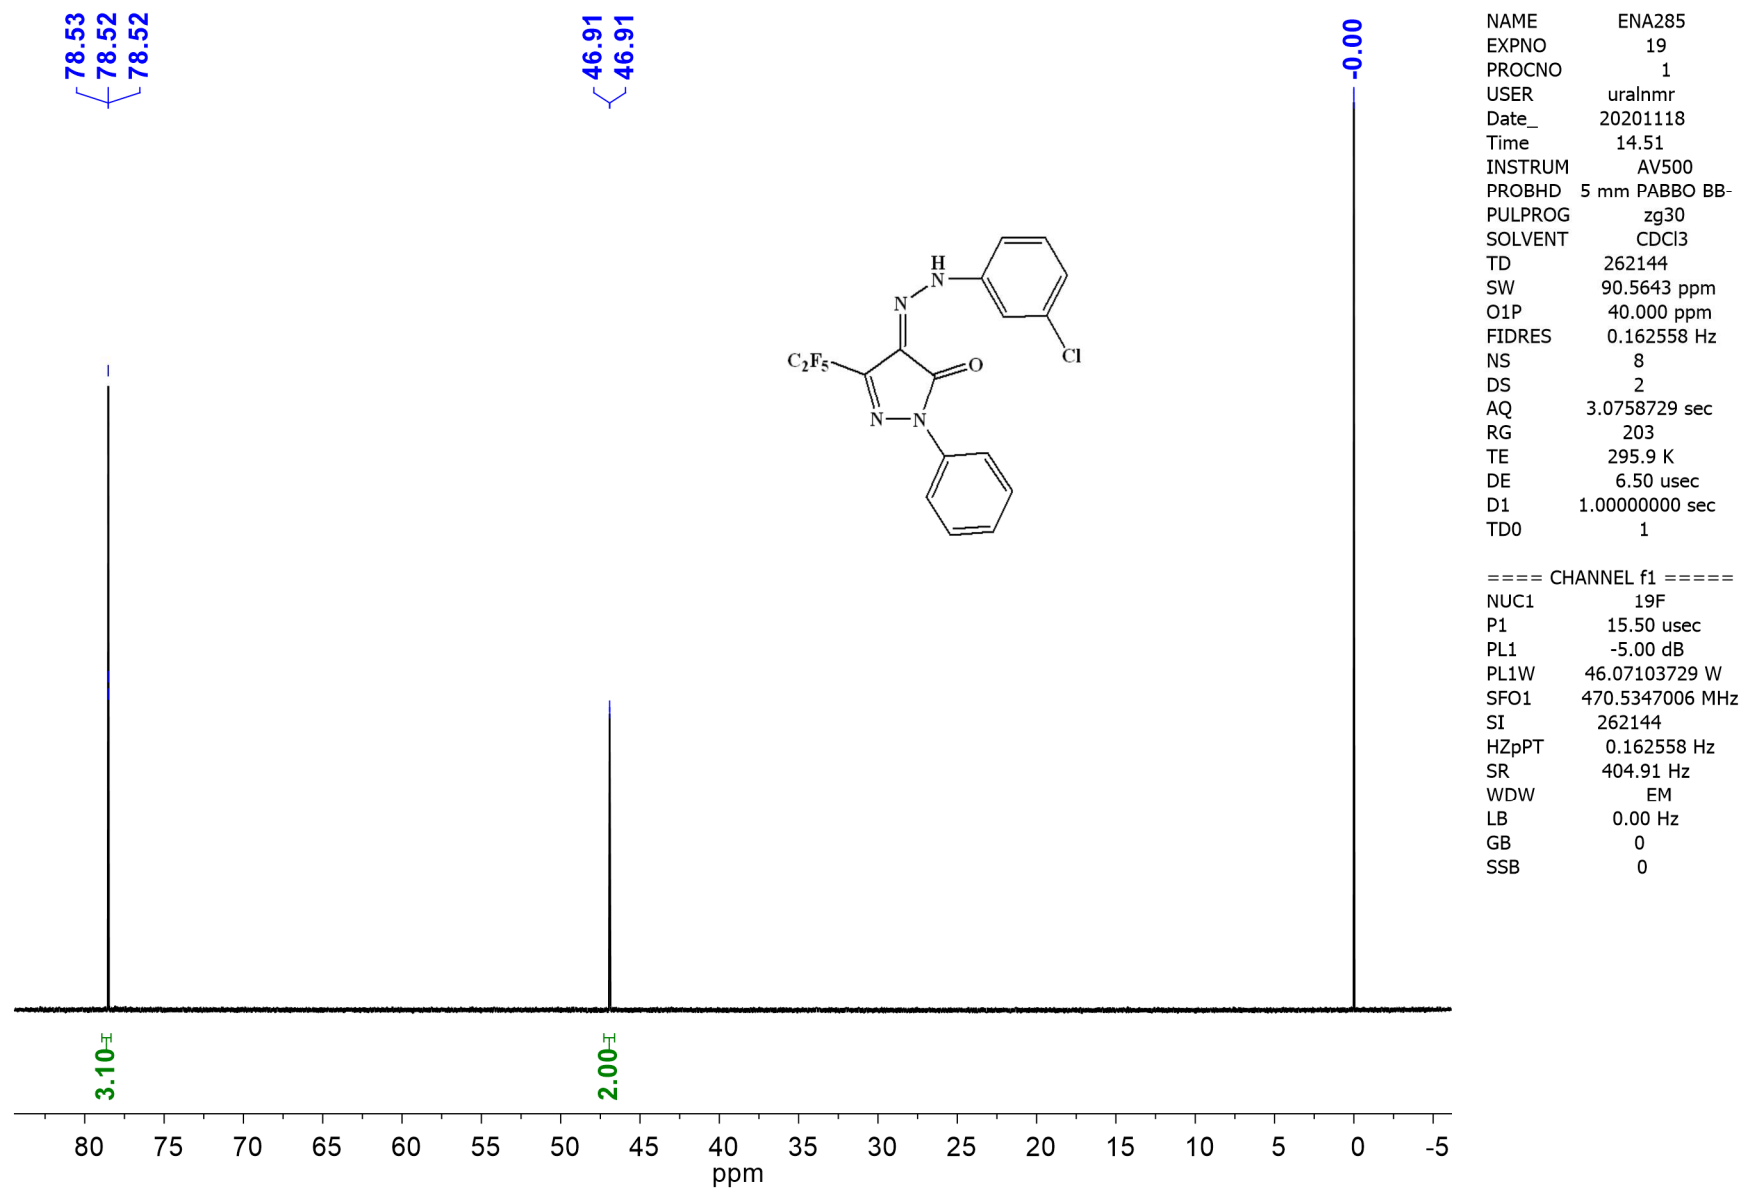

Figure S65. <sup>1</sup>H NMR spectrum of compound **6e**

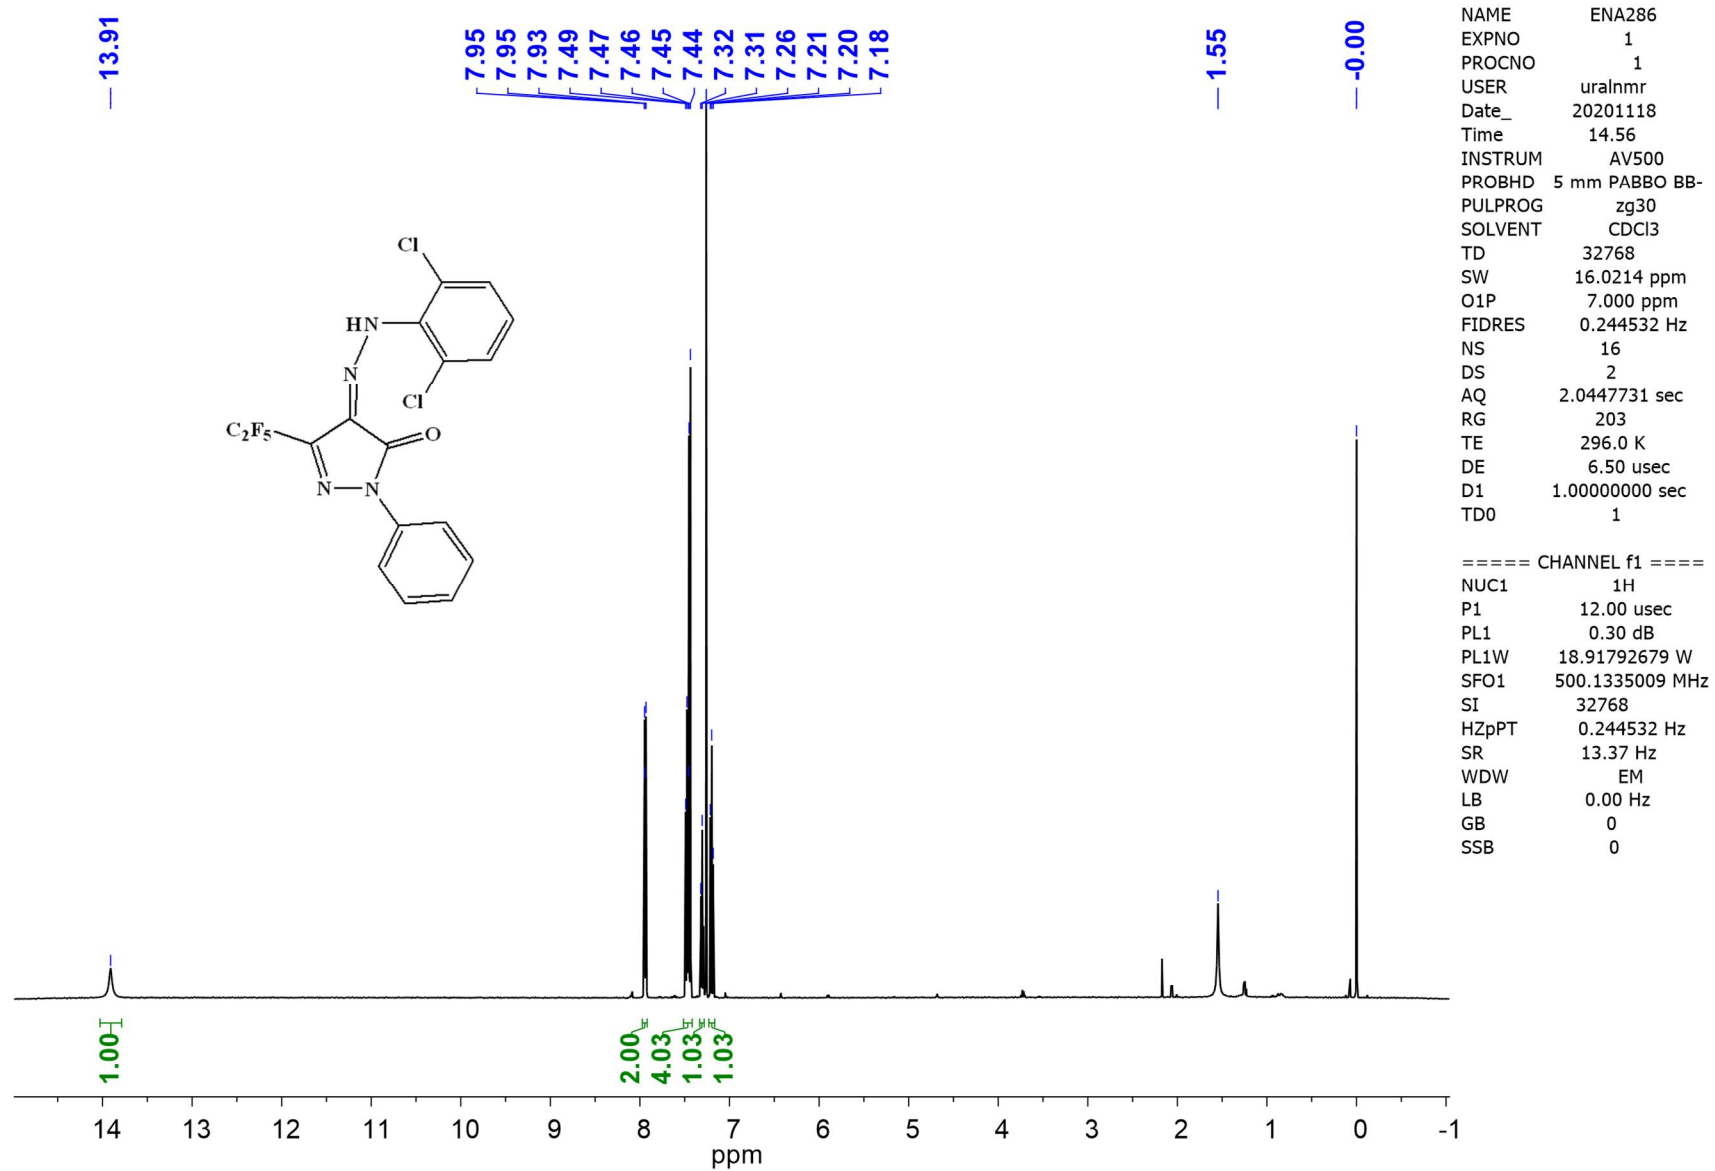

Figure S66.  $^{13}\text{C}$  NMR spectrum of compound **6e**

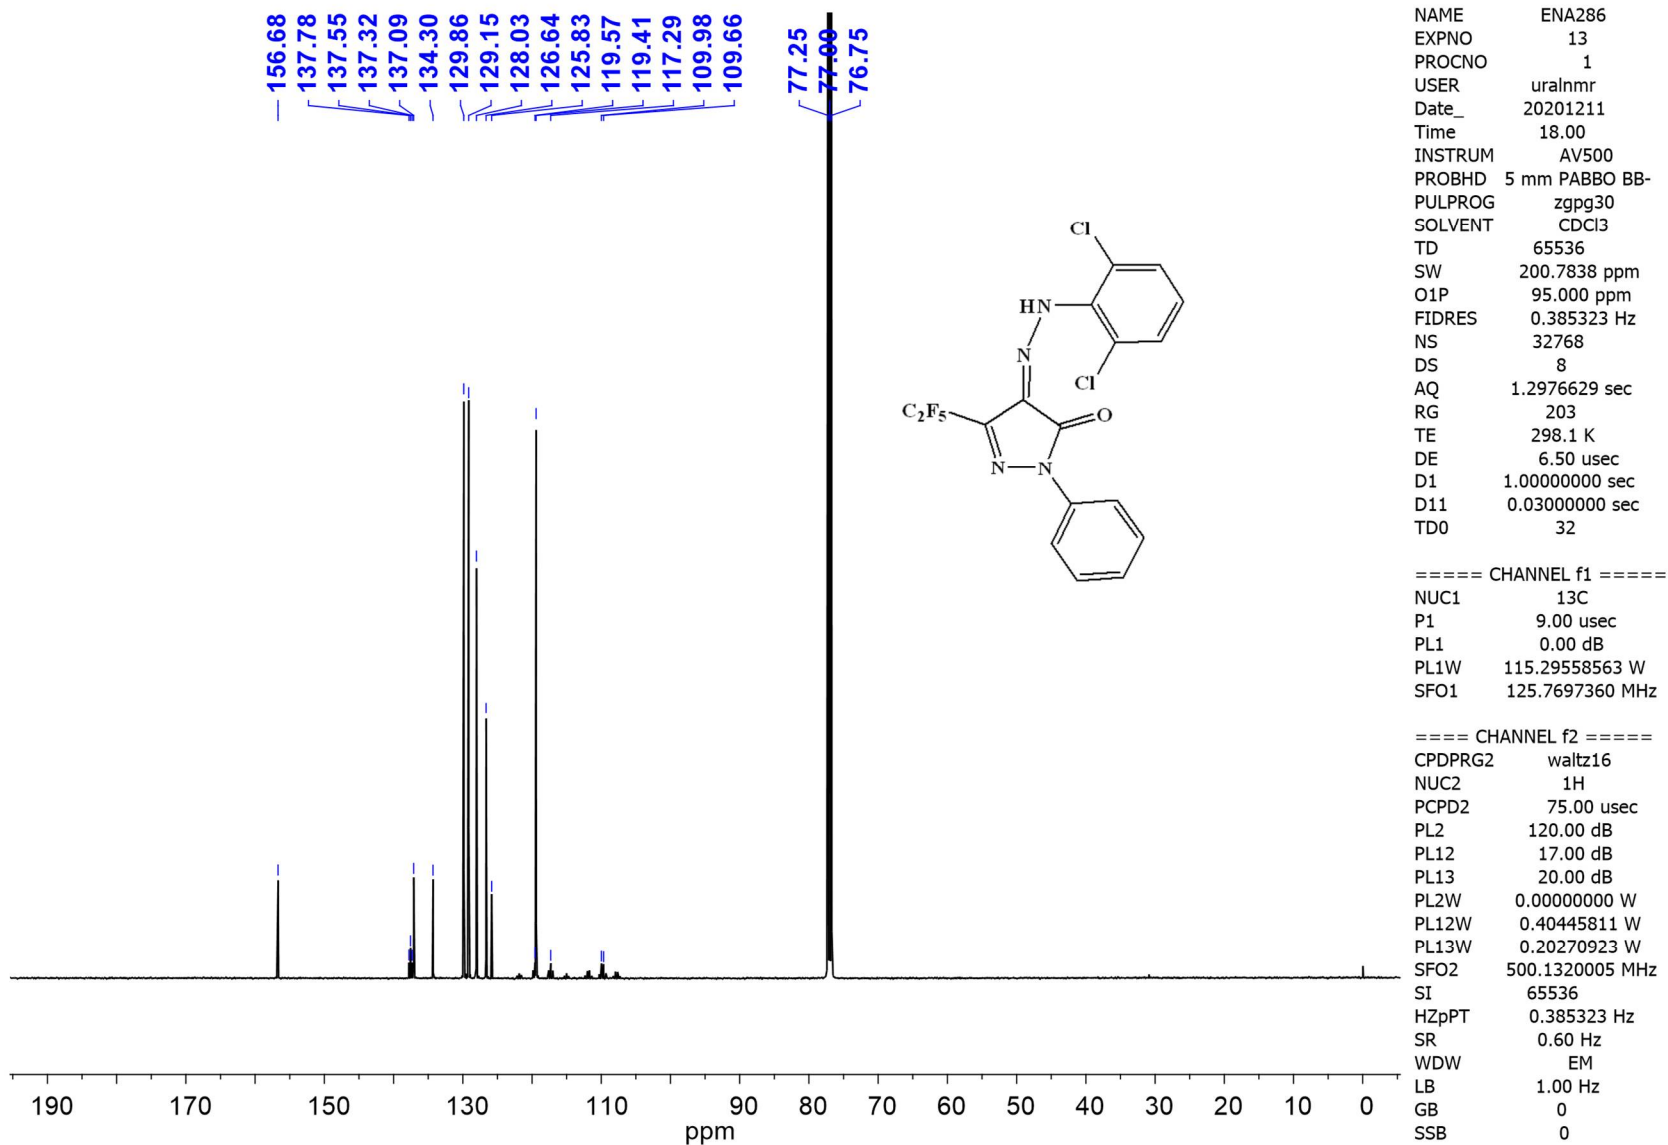

Figure S67.  $^{19}\text{F}$  NMR spectrum of compound **6e**

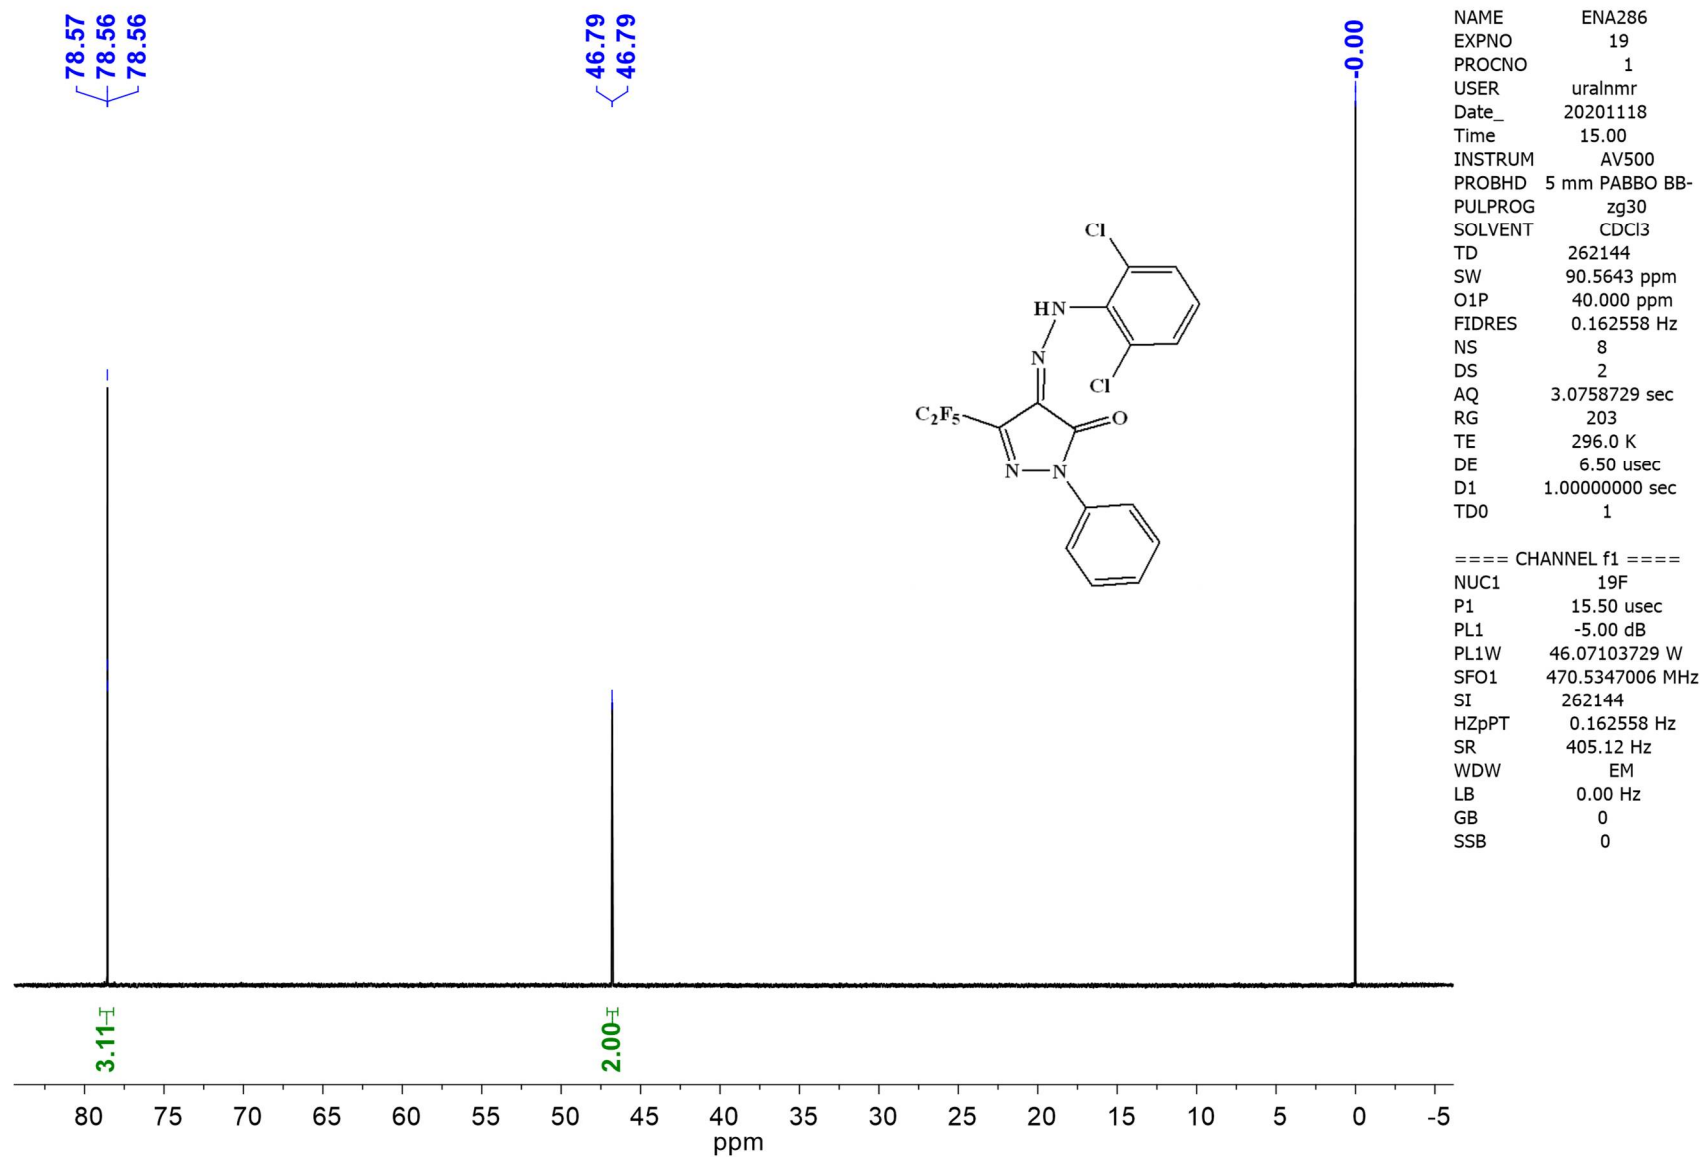

Figure S68. <sup>1</sup>H NMR spectrum of compound 6f

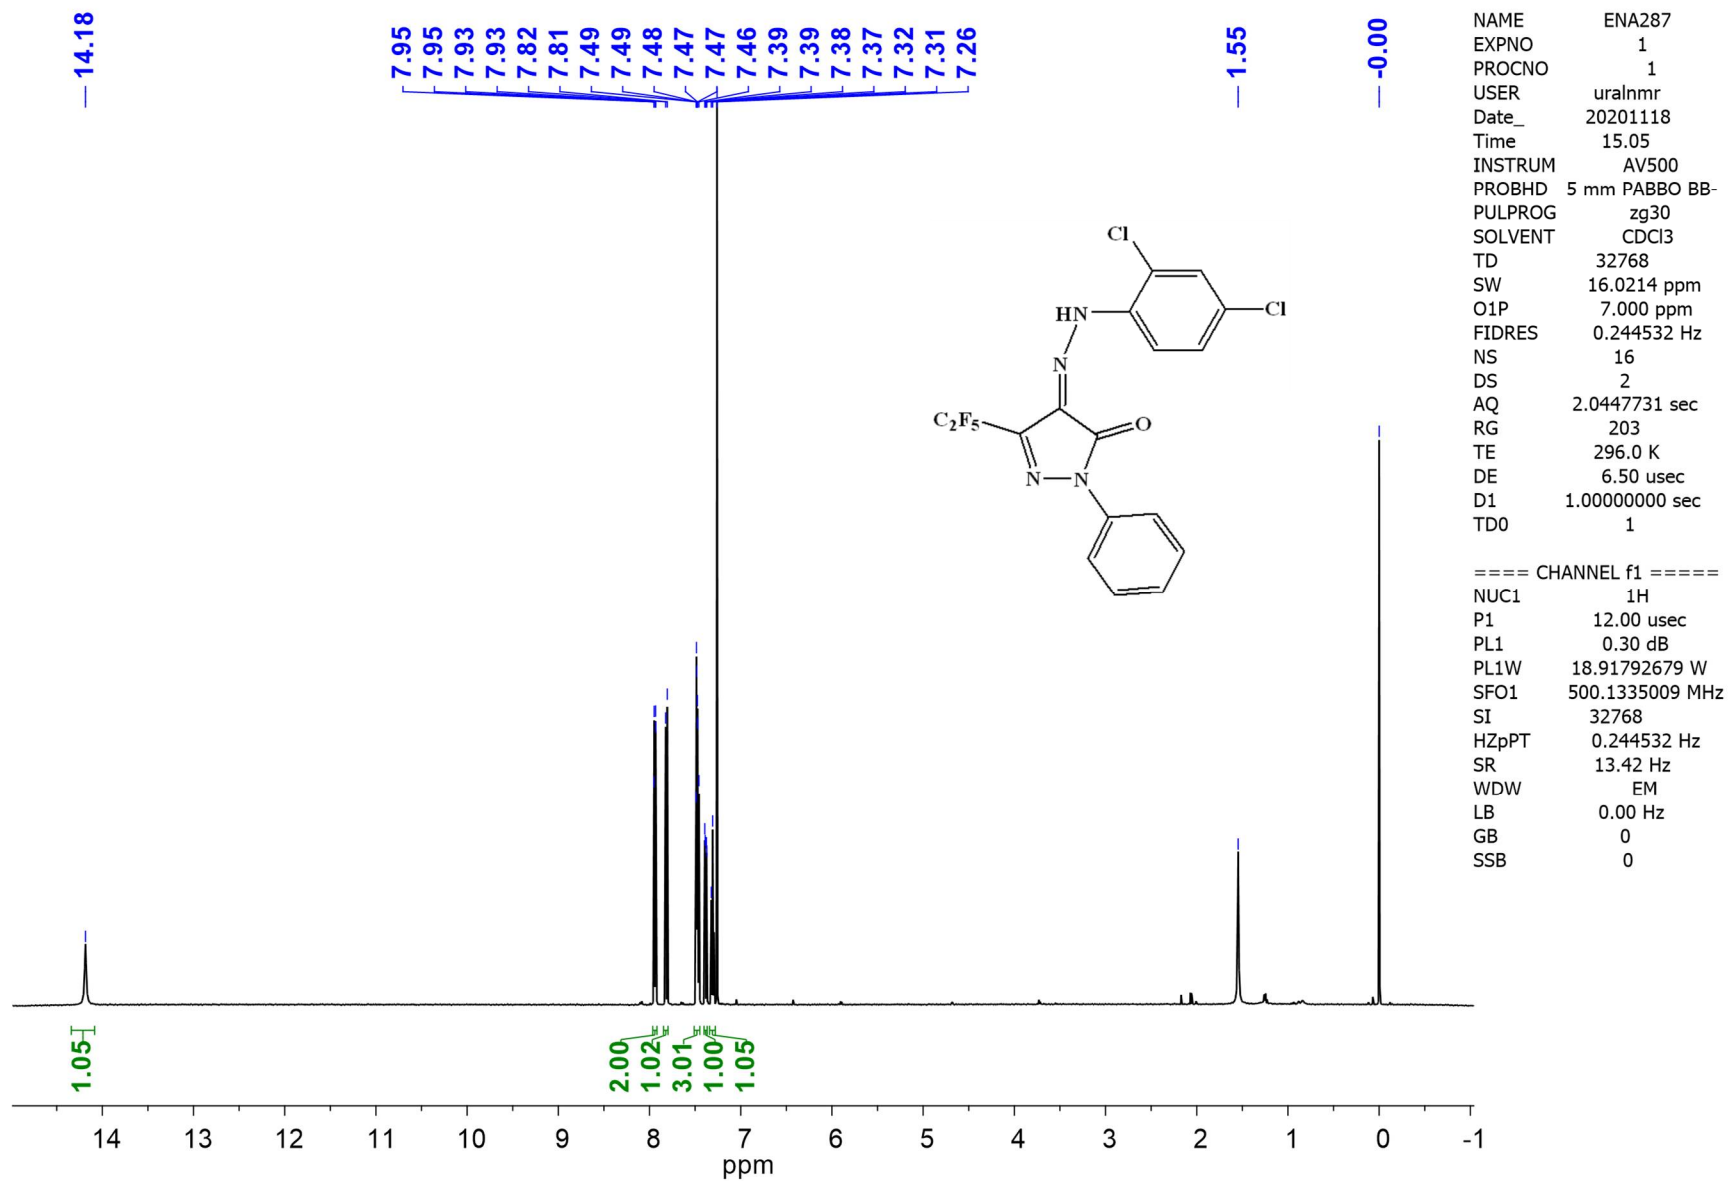

Figure S69.  $^{13}\text{C}$  NMR spectrum of compound **6f**

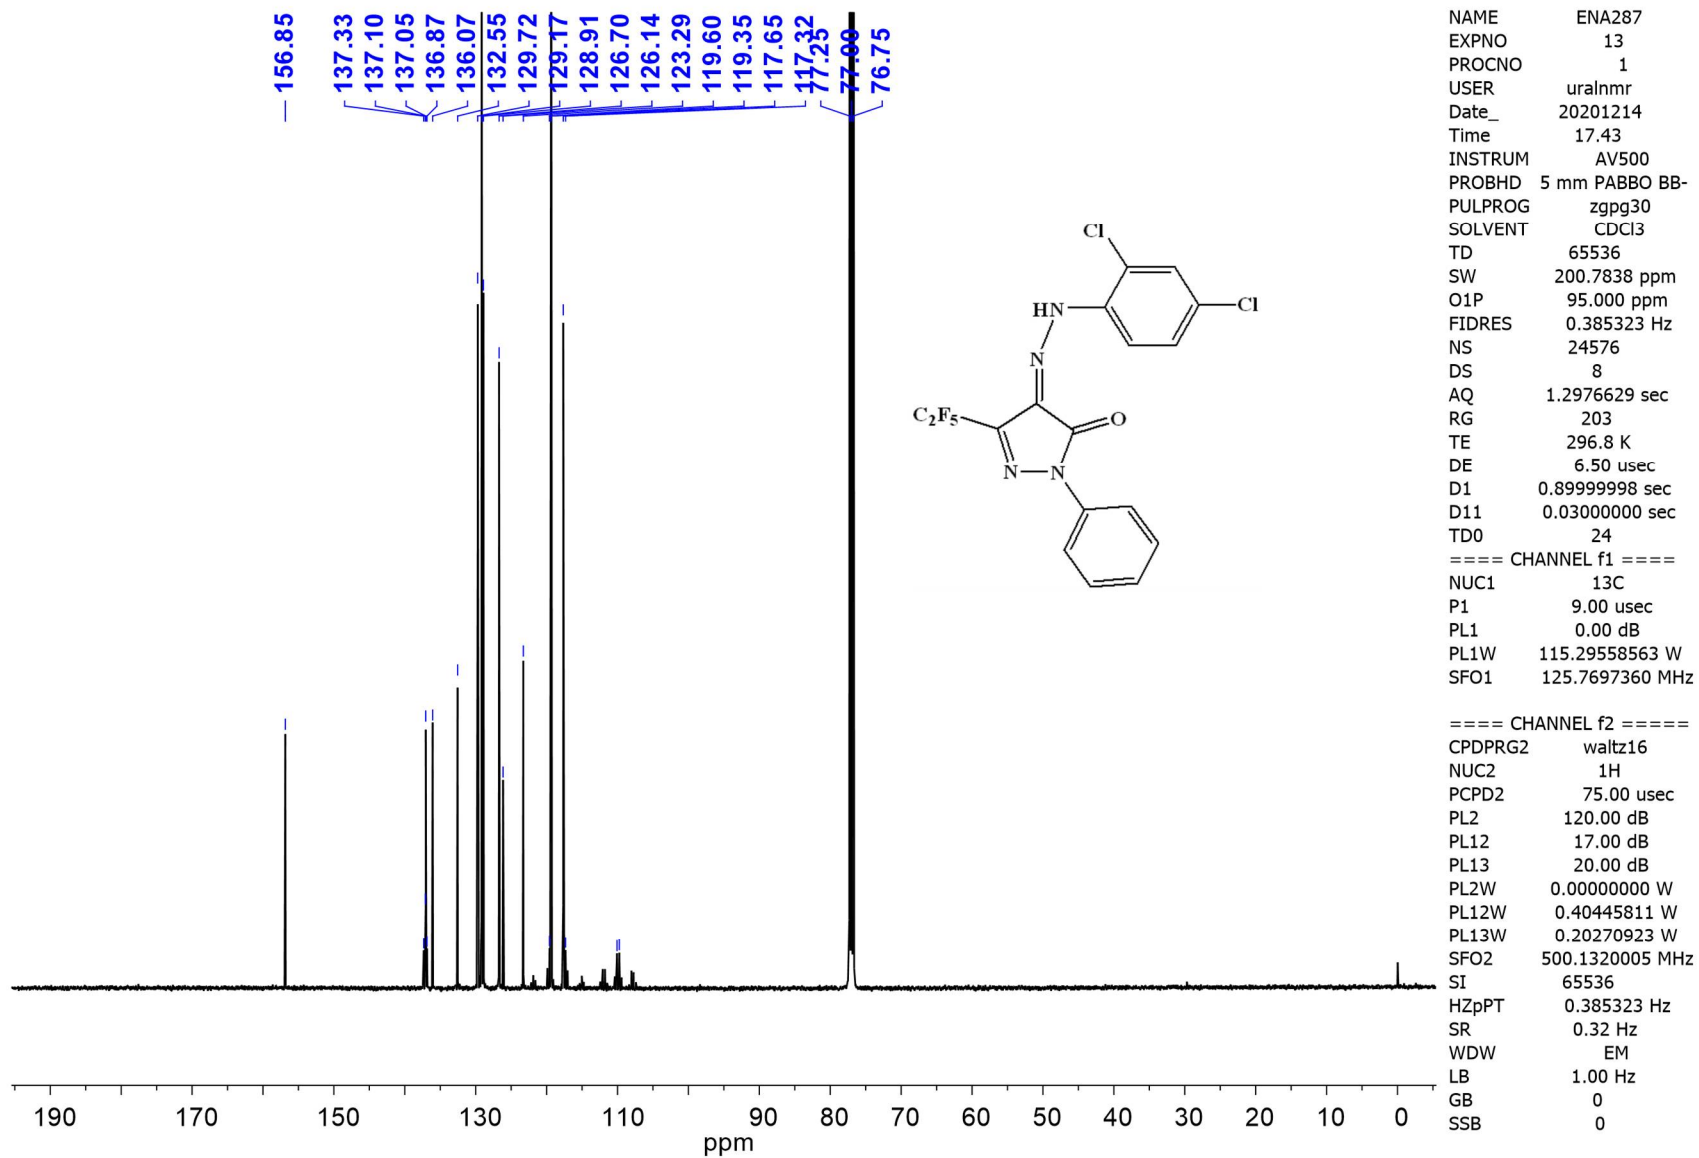



Figure S70.  $^{19}\text{F}$  NMR spectrum of compound **6f**

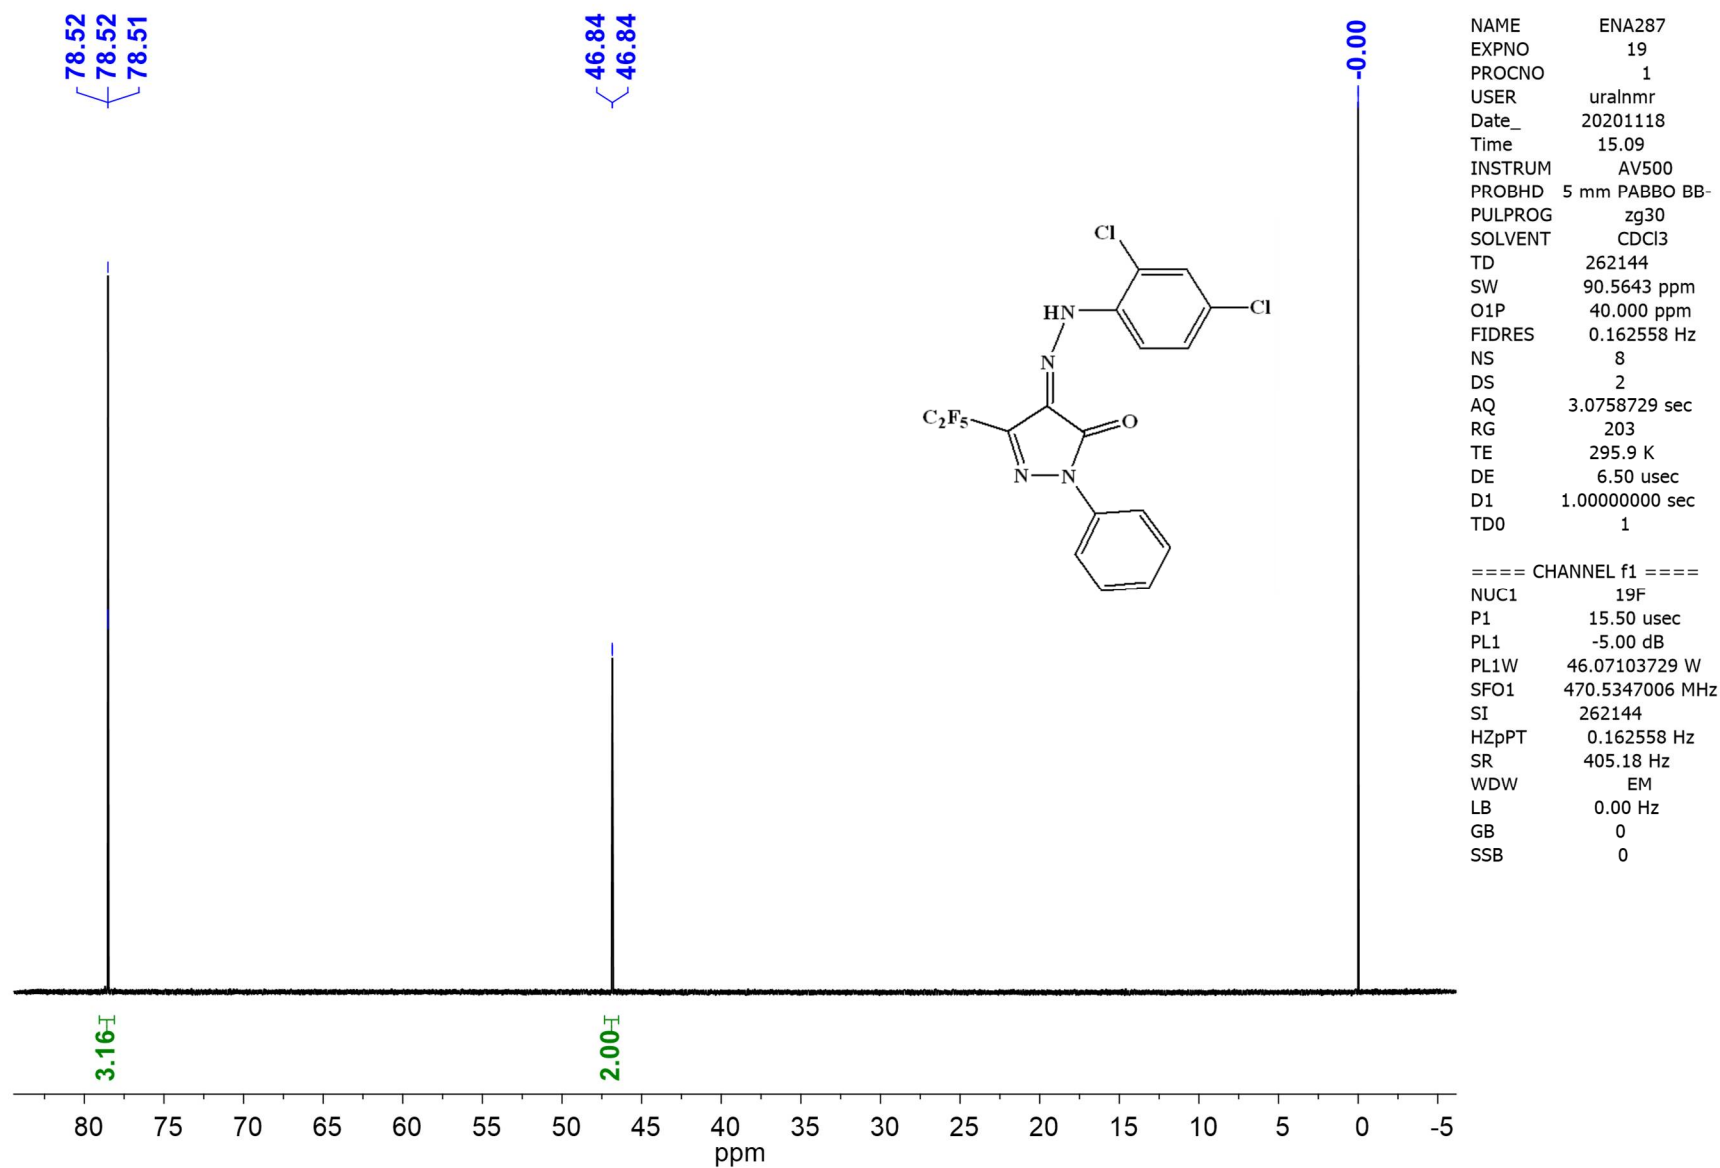

Figure S71. <sup>1</sup>H NMR spectrum of compound **6g**

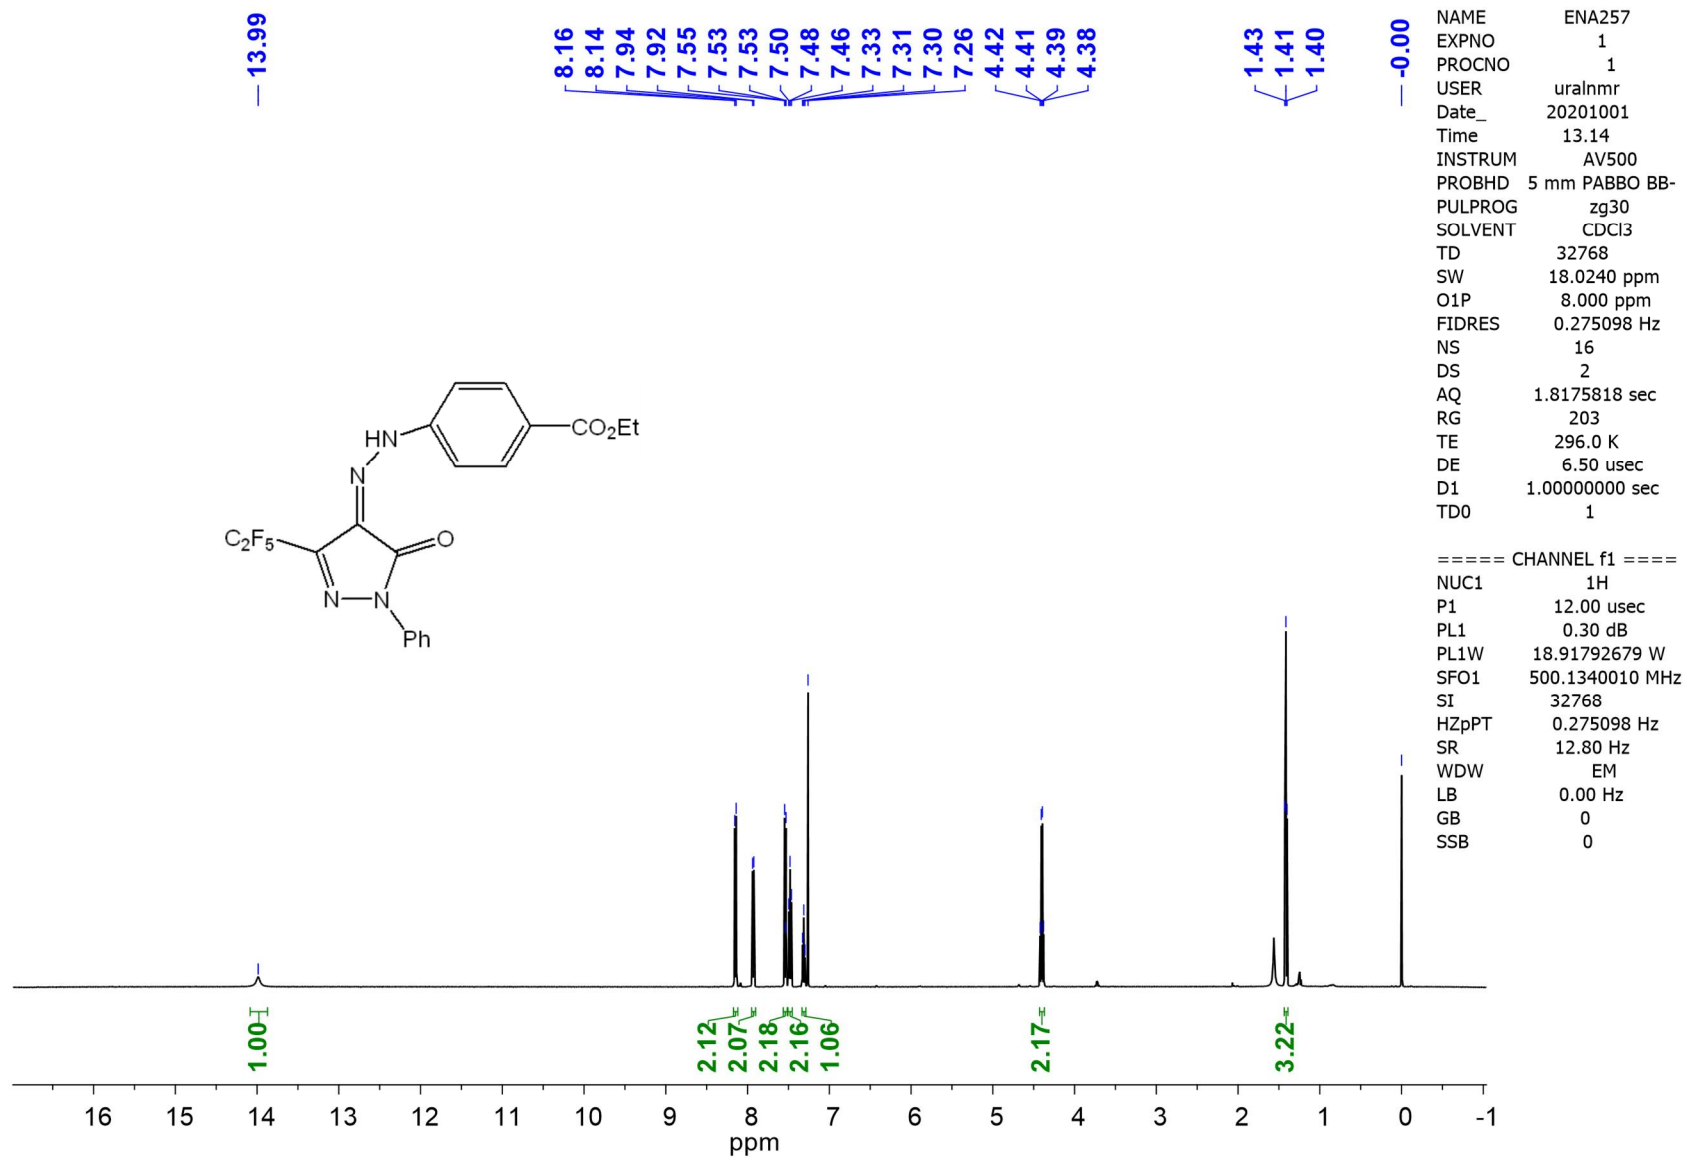

Figure S72.  $^{13}\text{C}$  NMR spectrum of compound **6g**

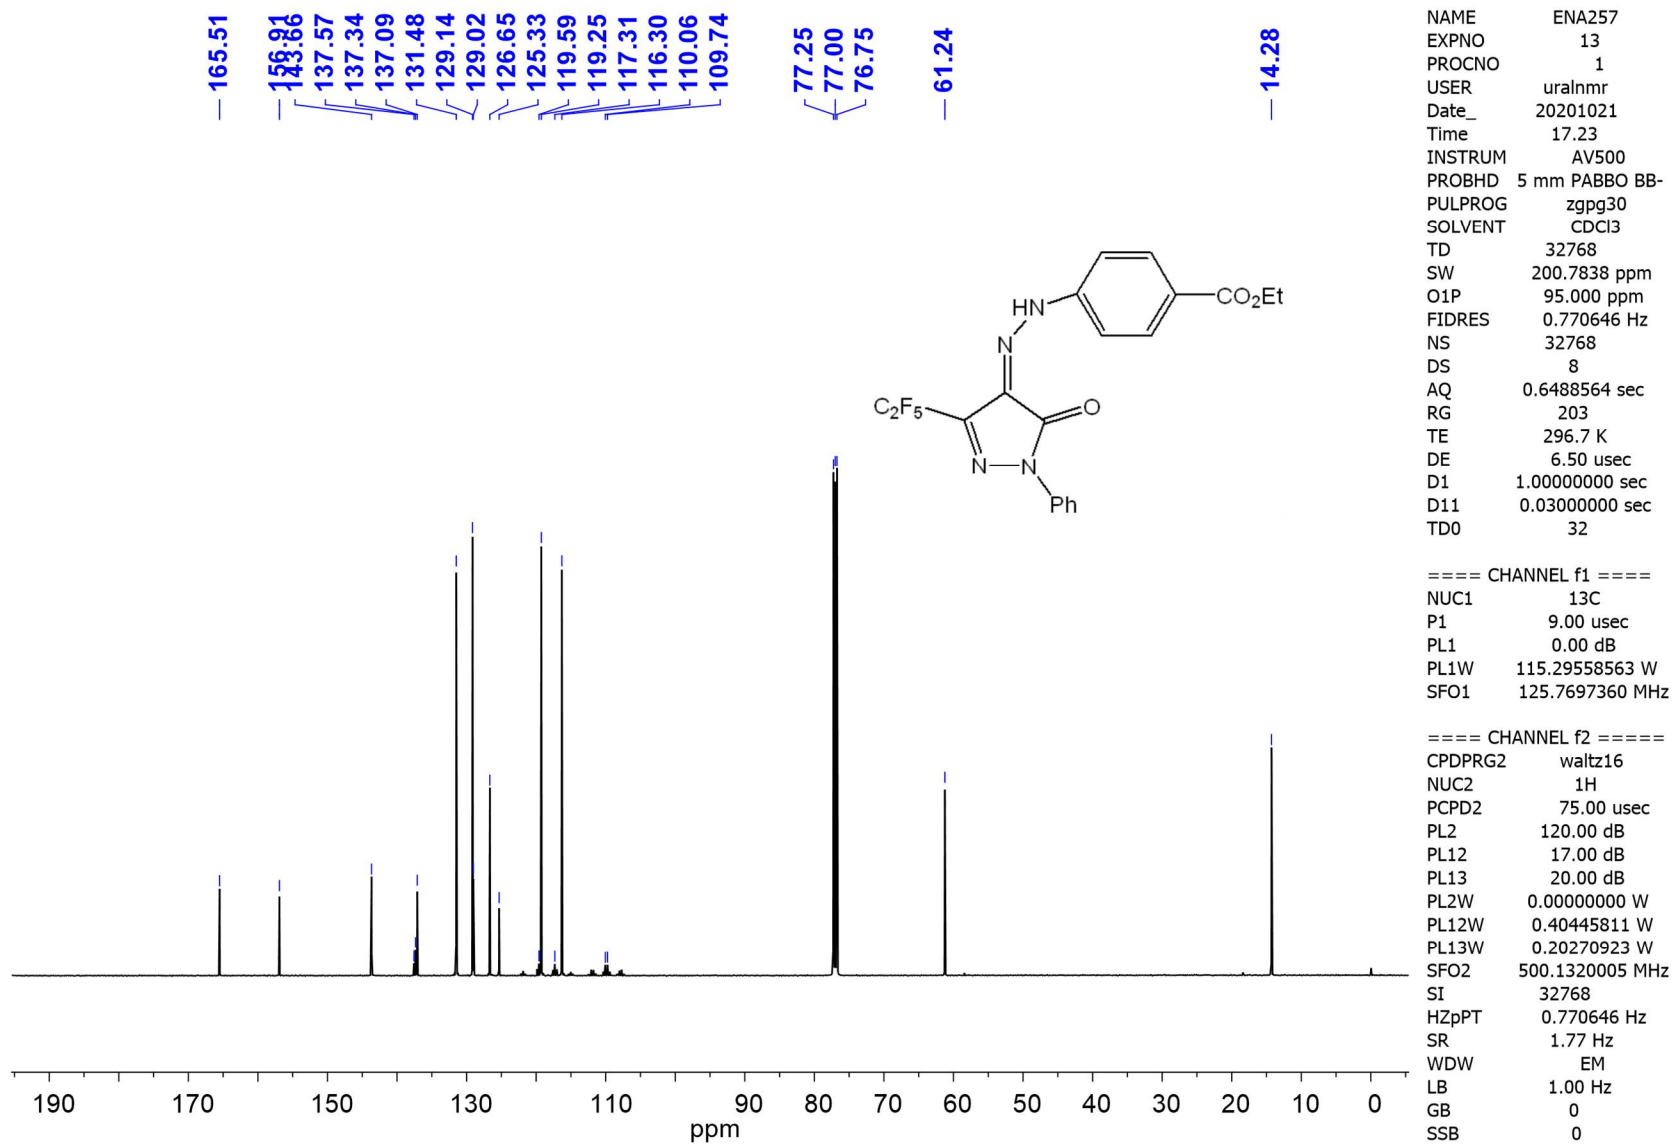

Figure S73.  $^{19}\text{F}$  NMR spectrum of compound **6g**

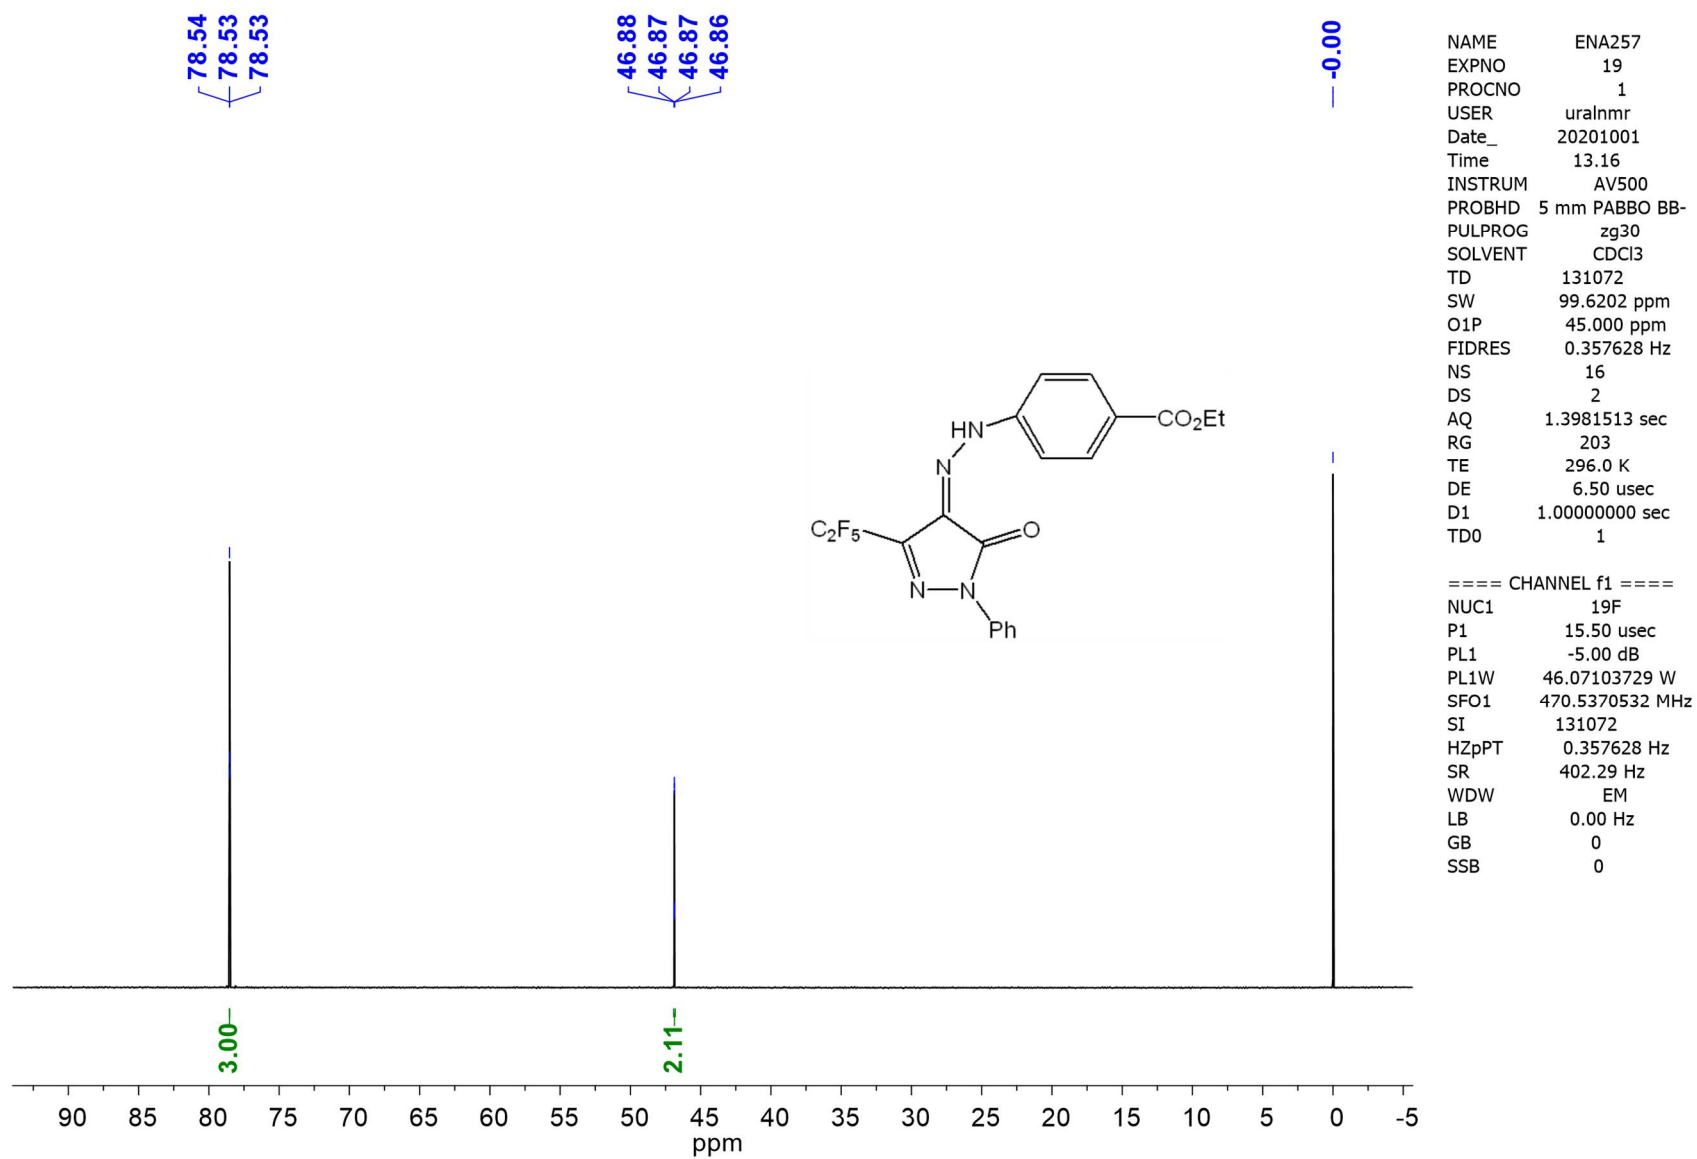

Figure S74. <sup>1</sup>H NMR spectrum of compound **6h**

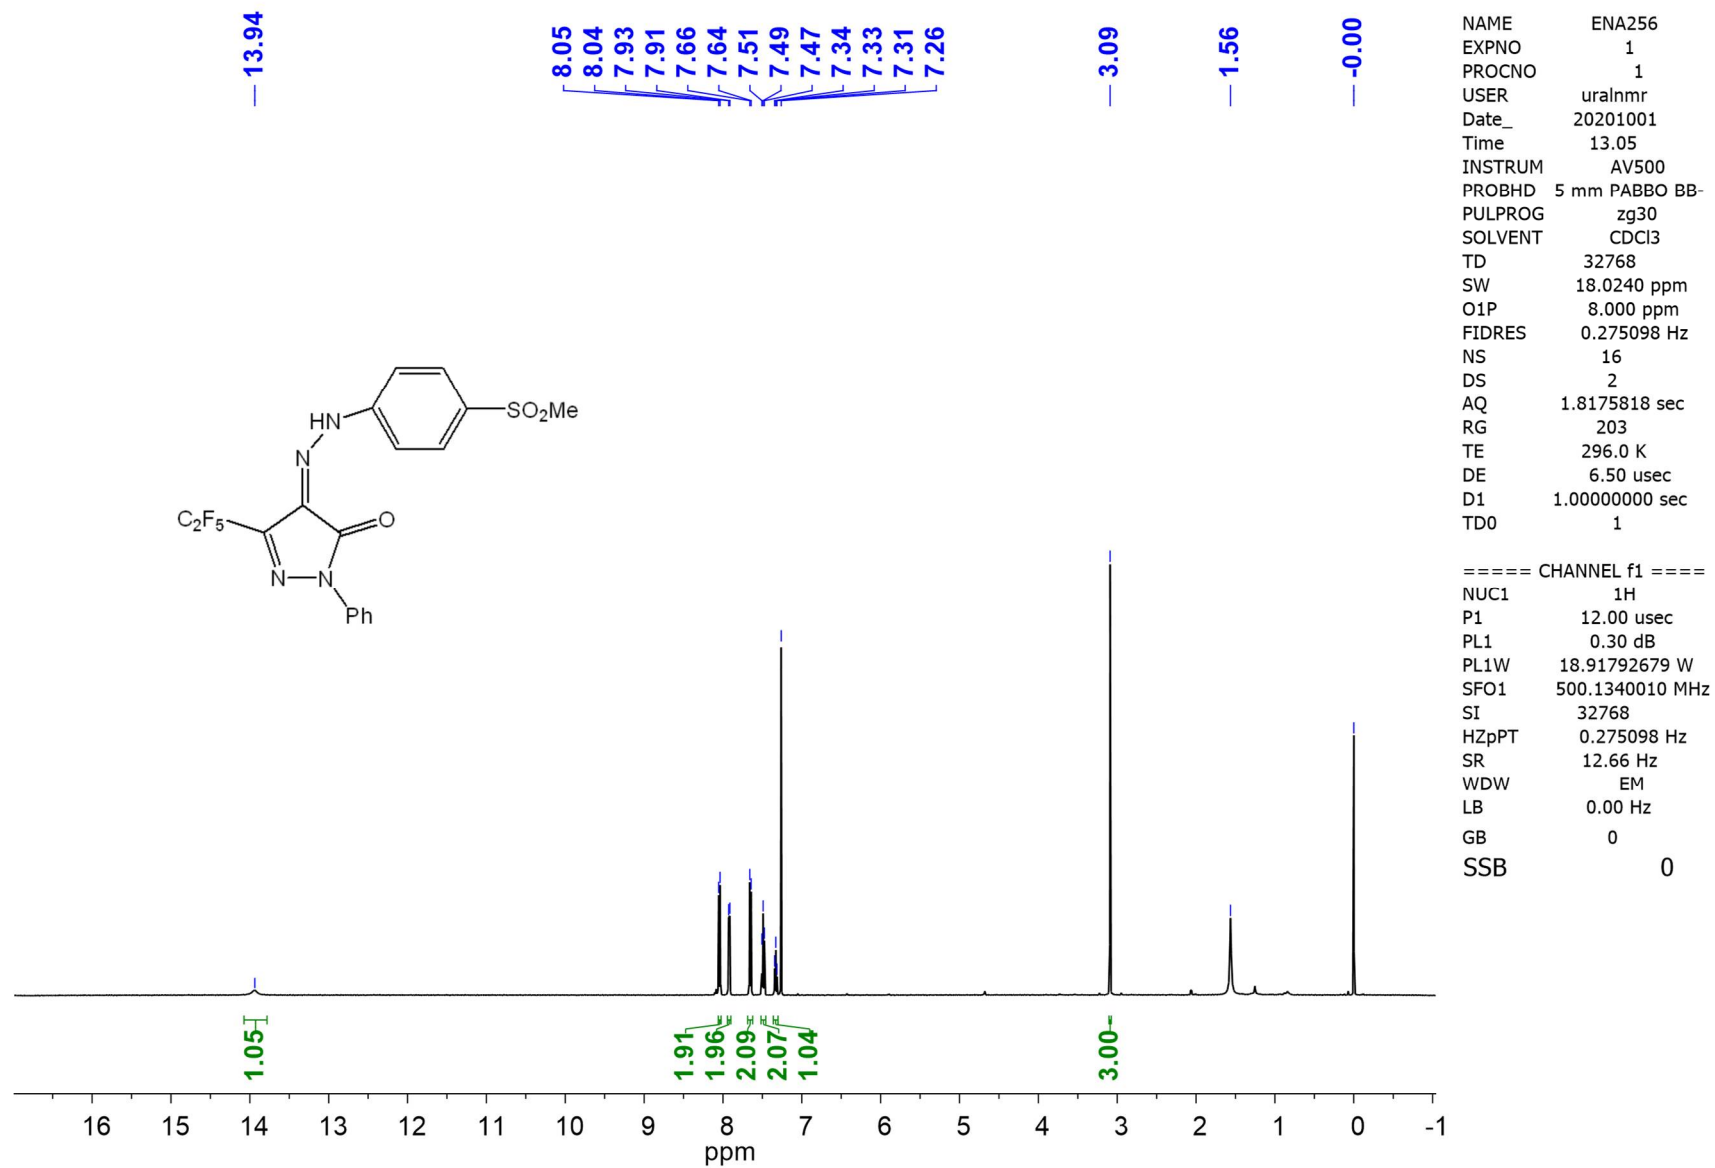

Figure S75.  $^{13}\text{C}$  NMR spectrum of compound **6h**

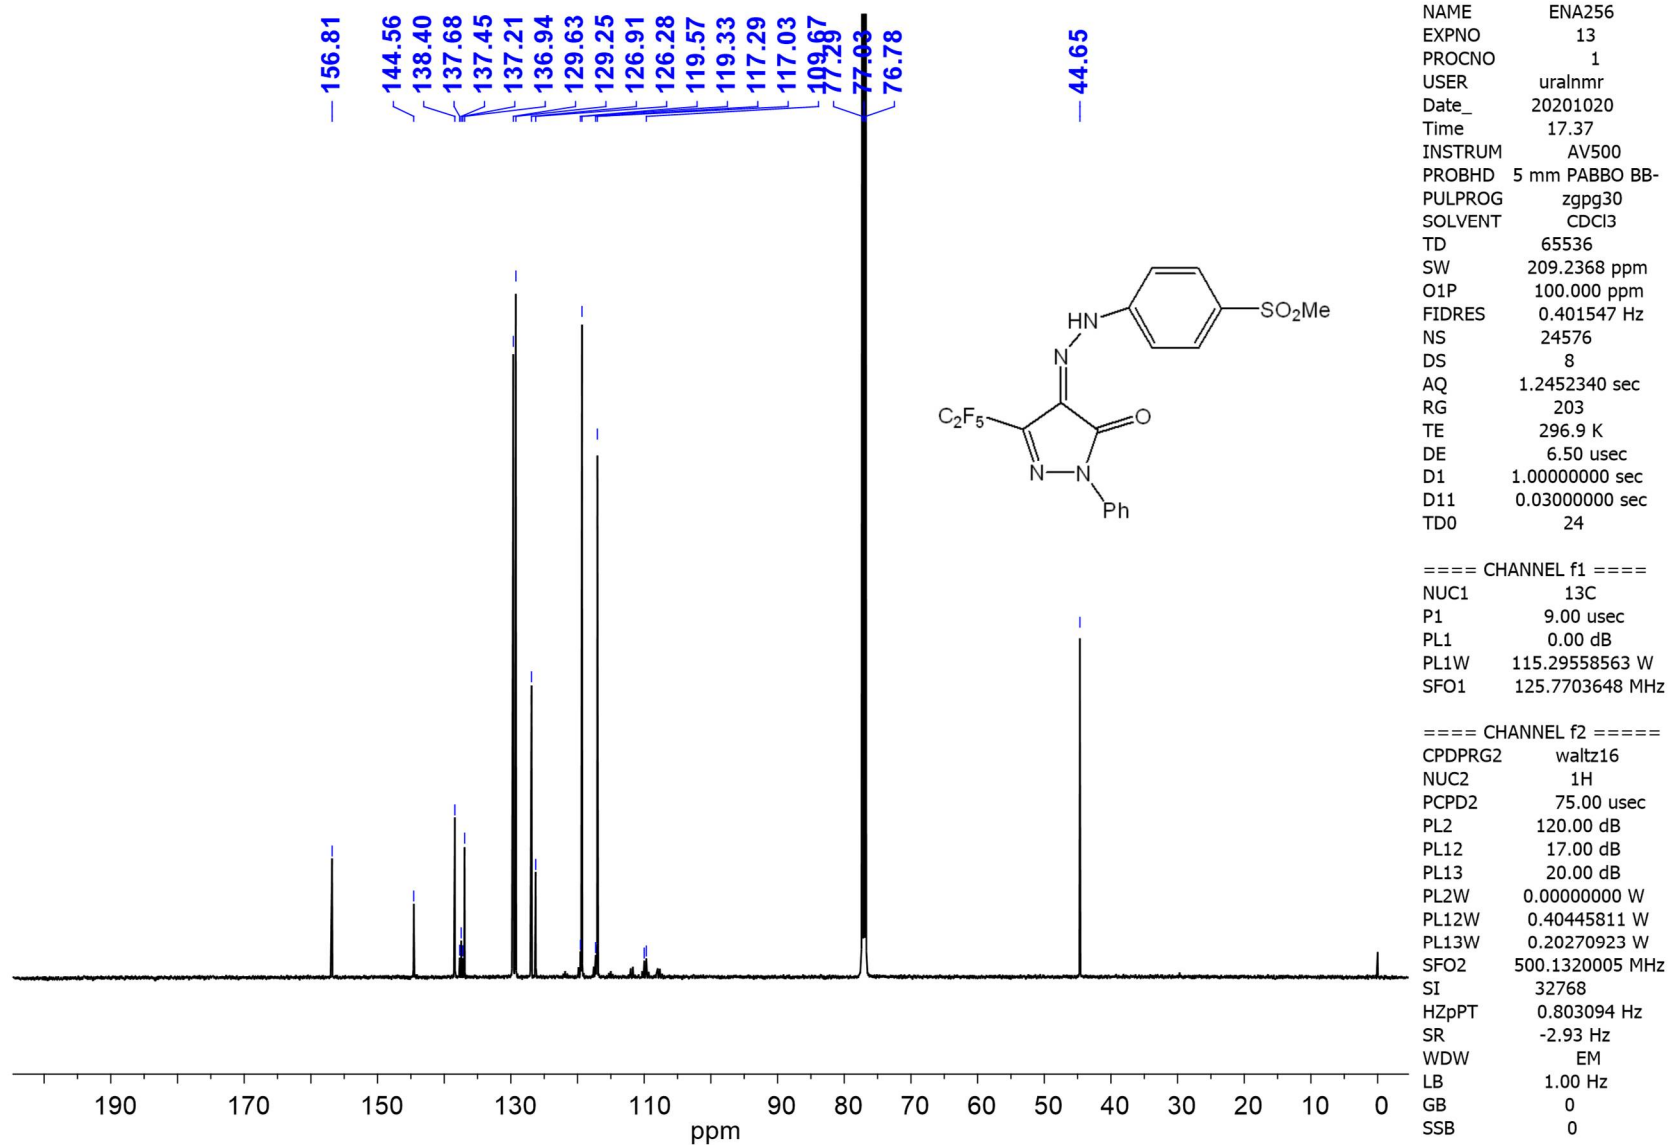

Figure S76.  $^{19}\text{F}$  NMR spectrum of compound **6h**

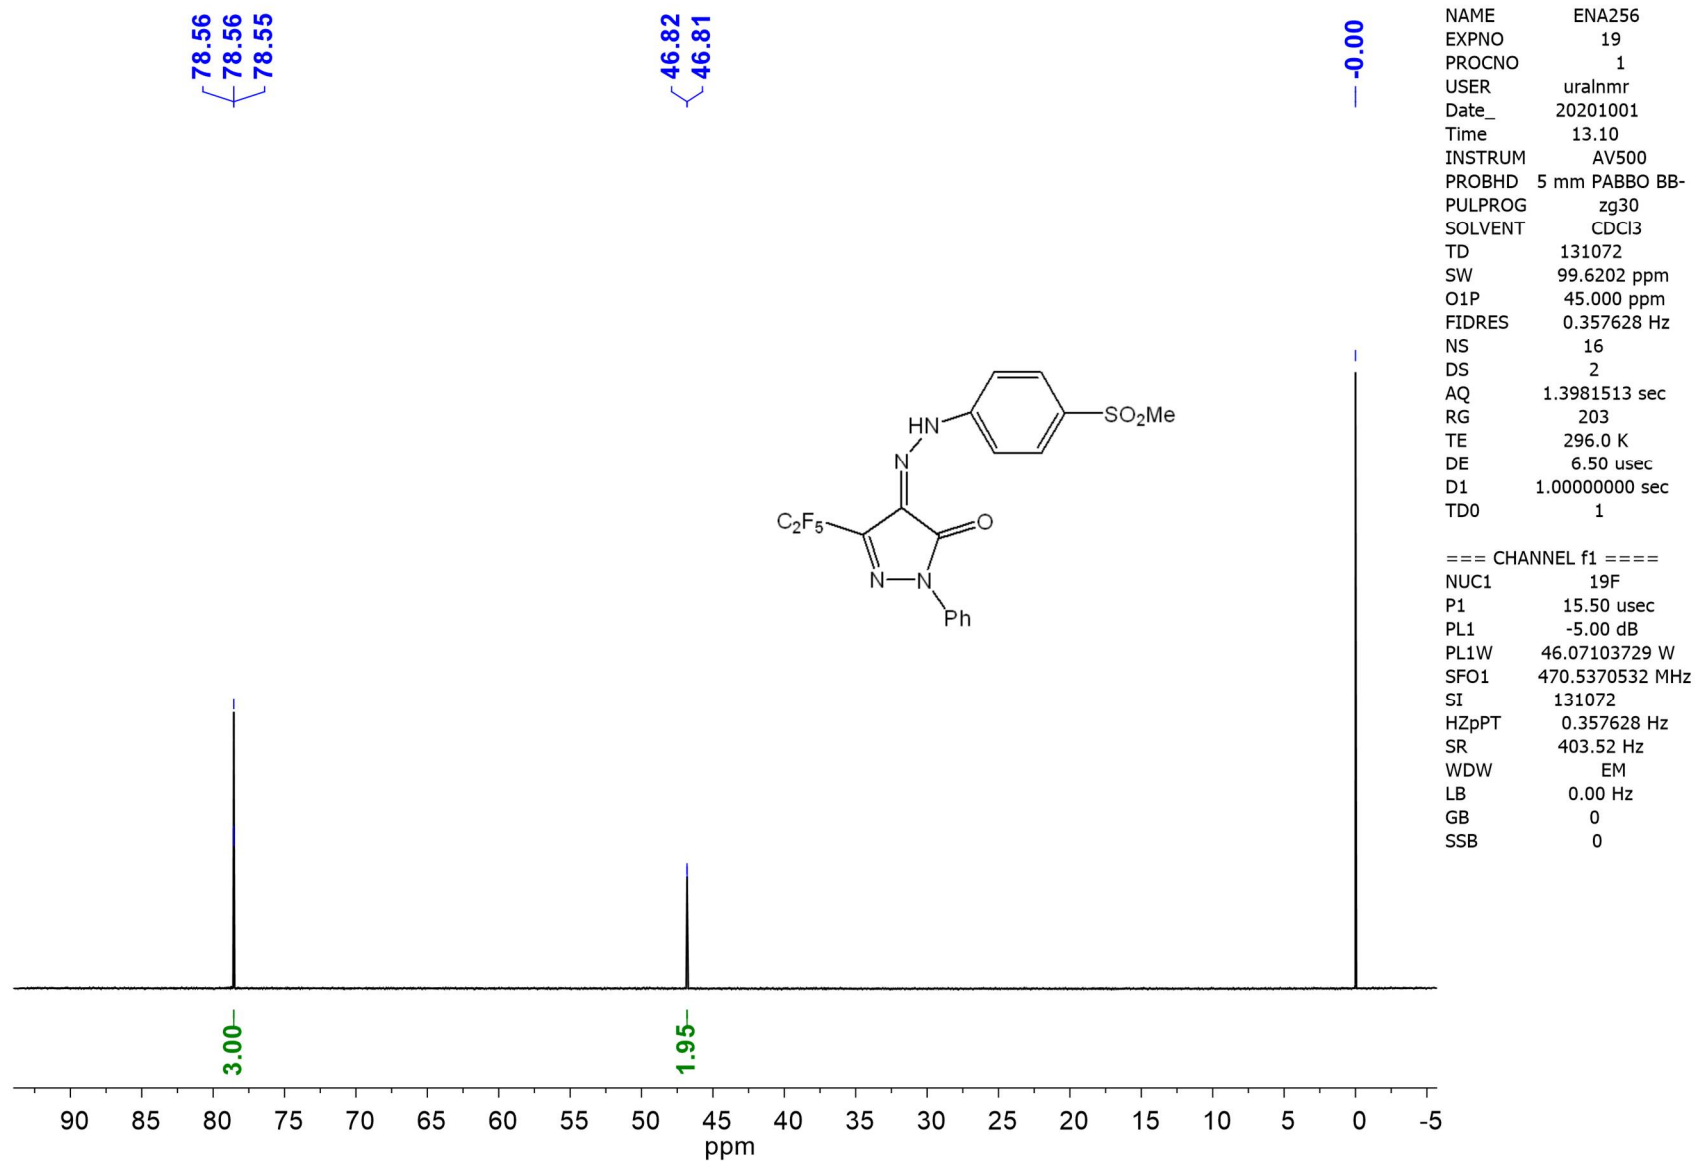

Figure S77. <sup>1</sup>H NMR spectrum of compound **6i**

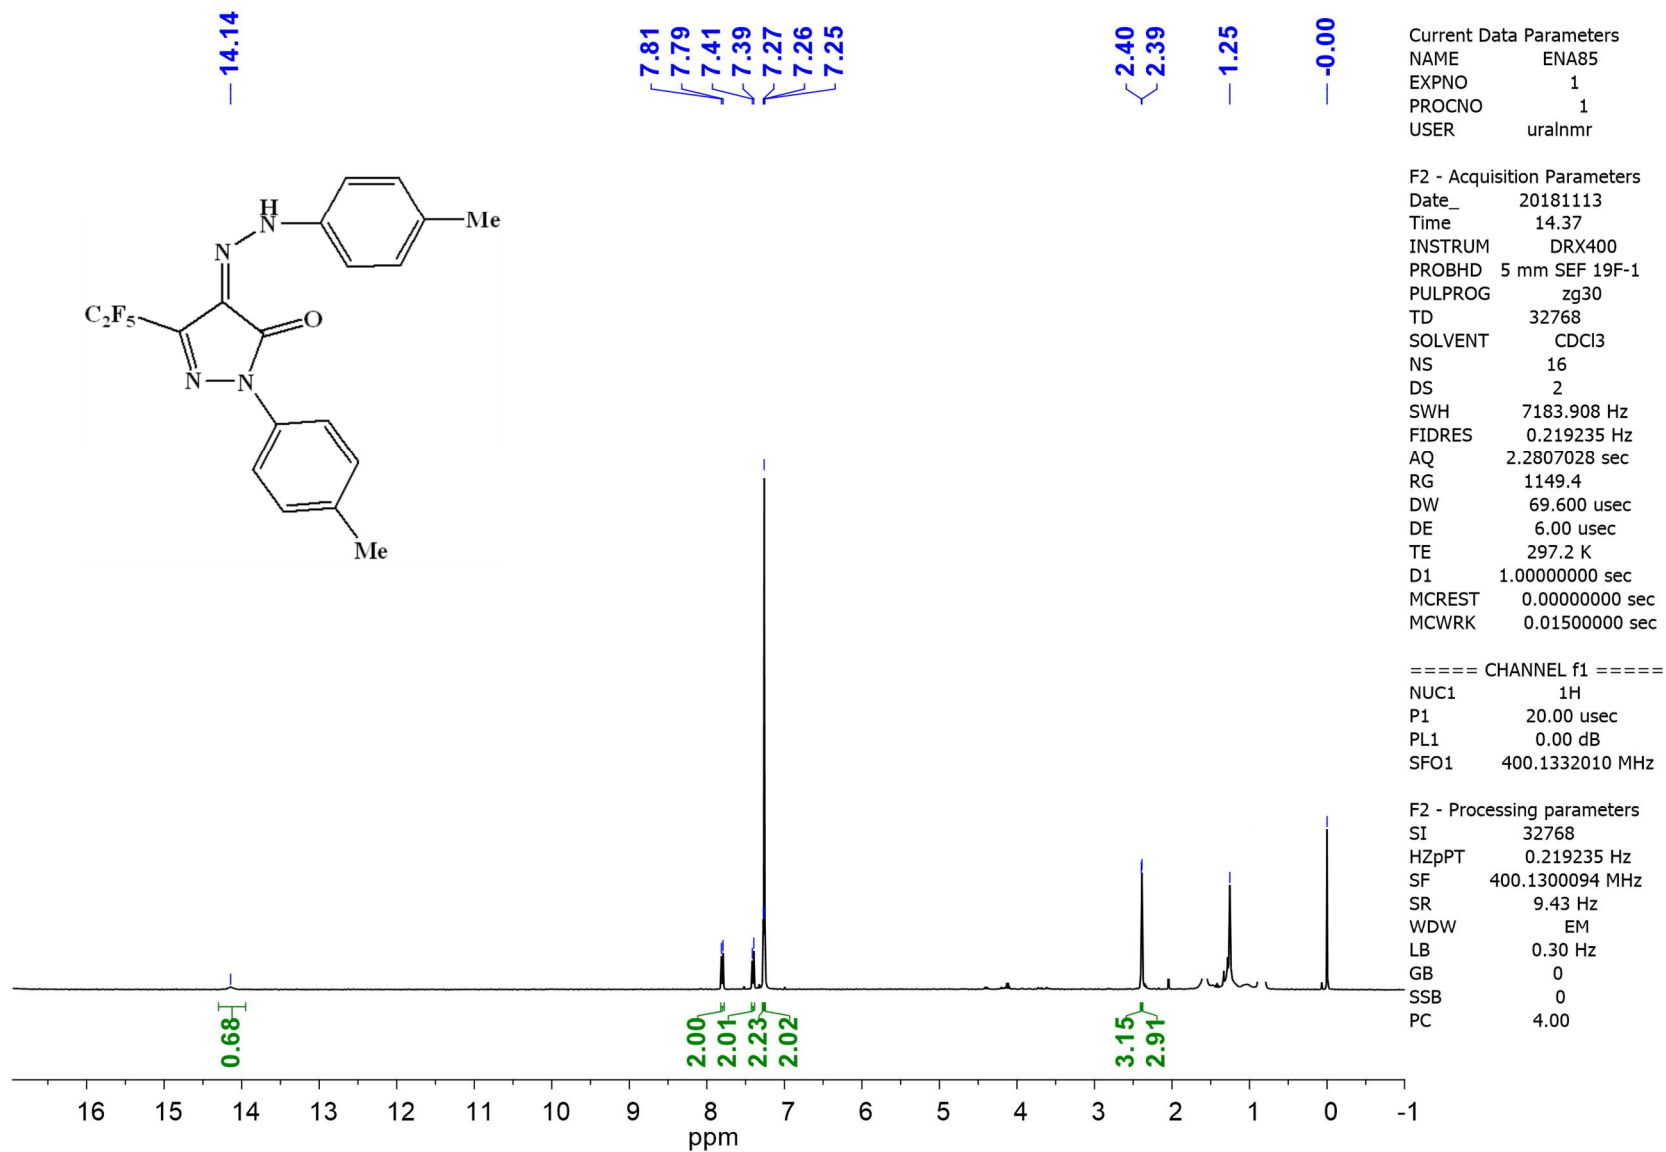



Figure S78.  $^{19}\text{F}$  NMR spectrum of compound **6i**

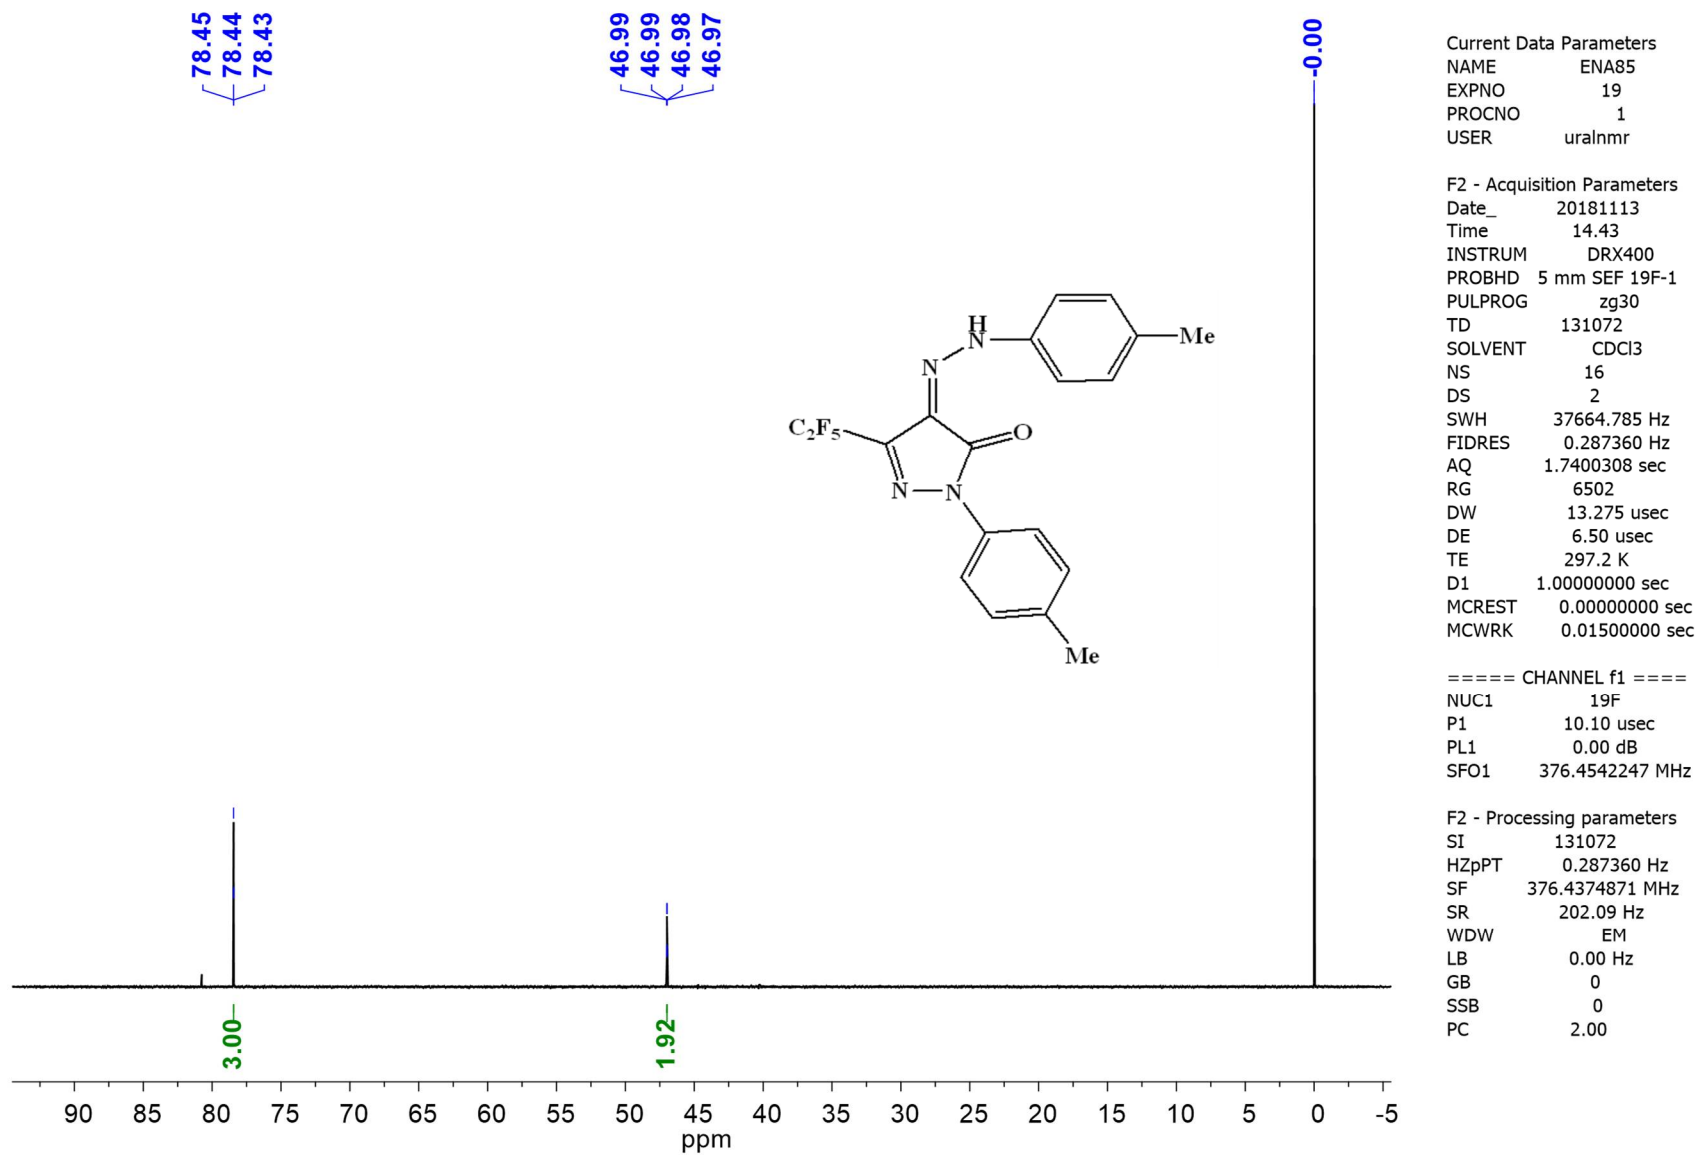

Figure S79. <sup>1</sup>H NMR spectrum of compound 7a

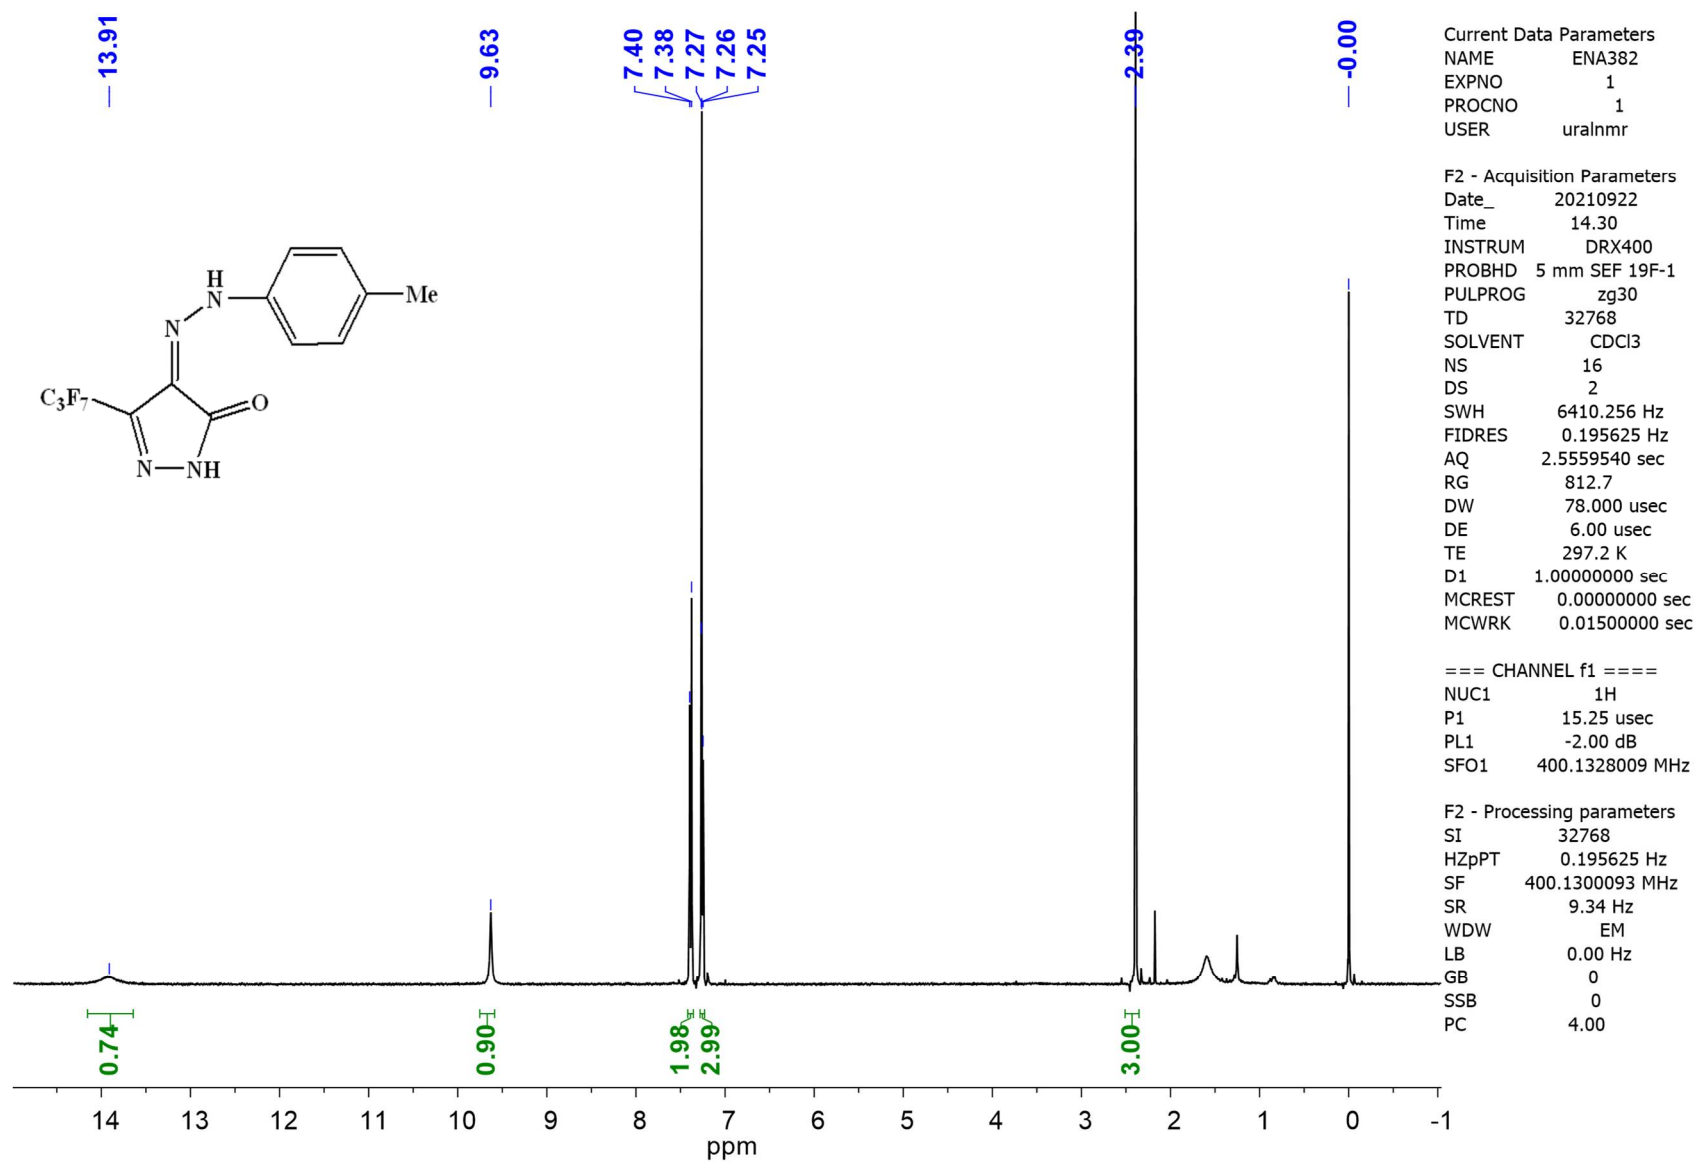

Figure S80.  $^{13}\text{C}$  NMR spectrum of compound **7a**

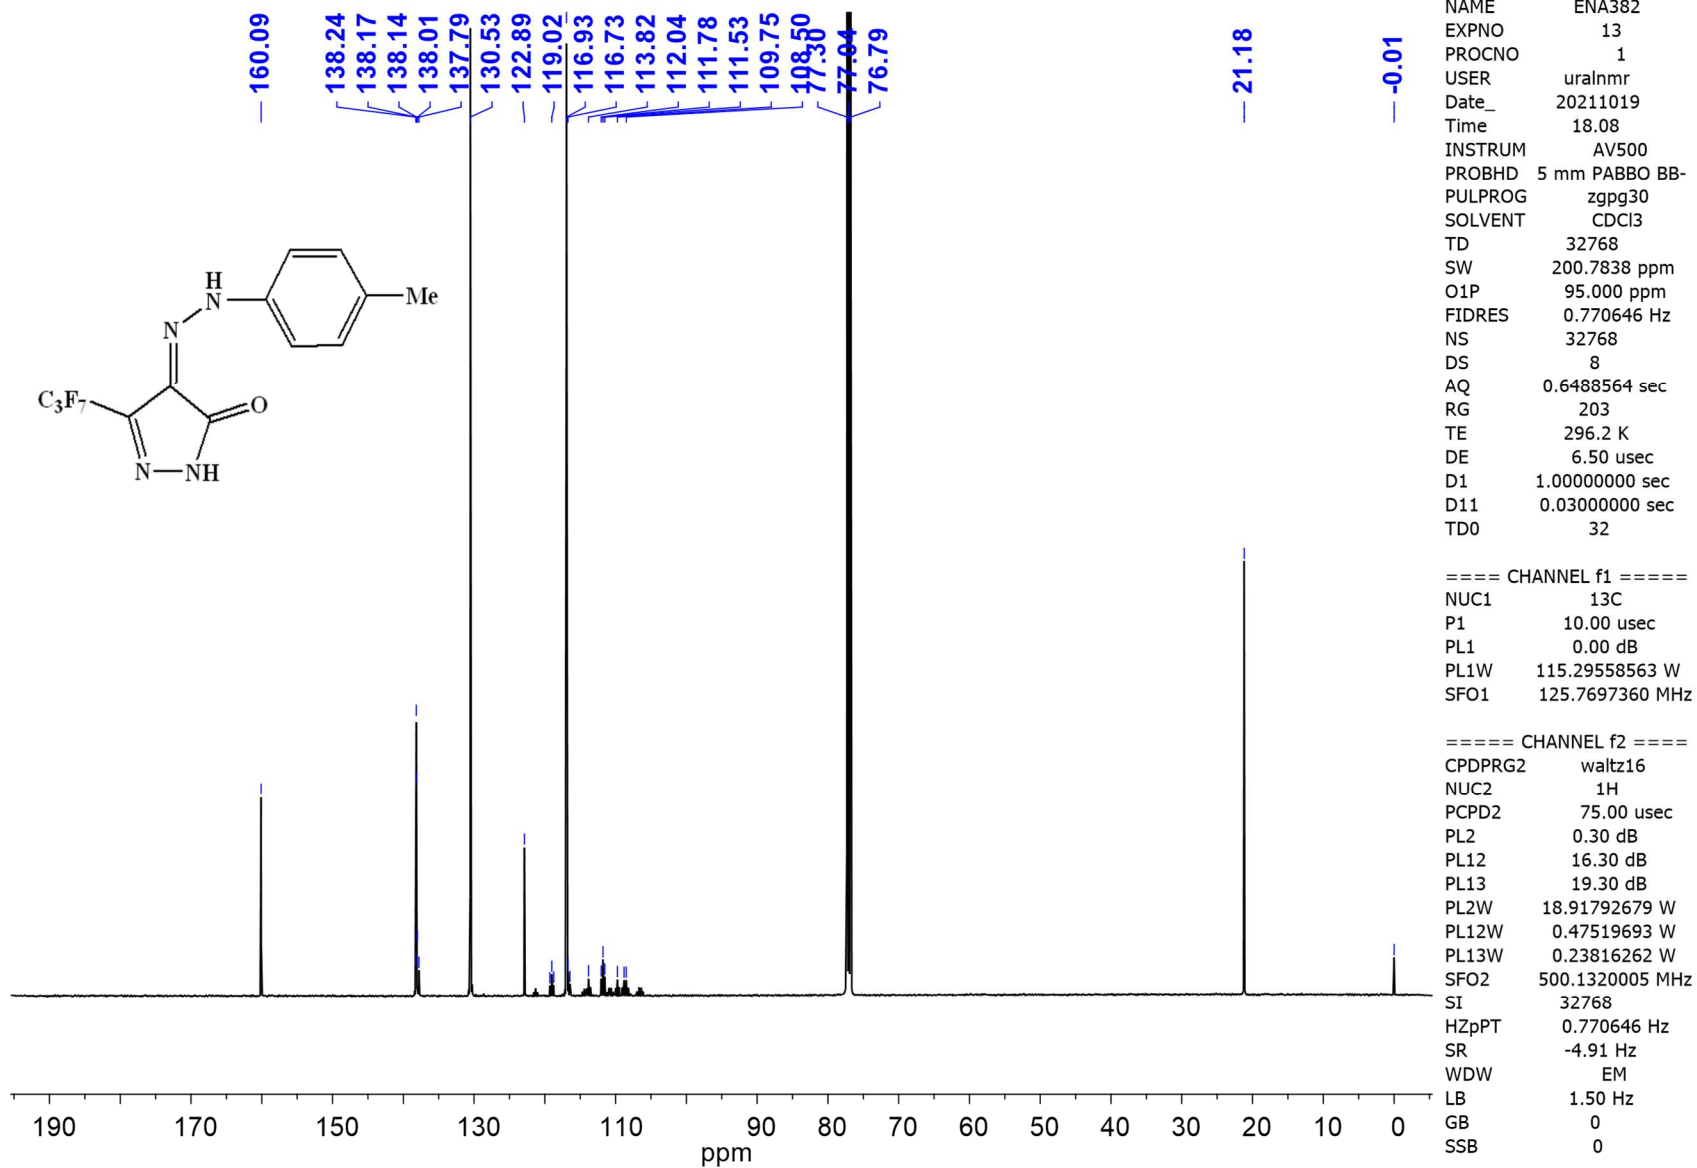

Figure S81.  $^{19}\text{F}$  NMR spectrum of compound **7a**

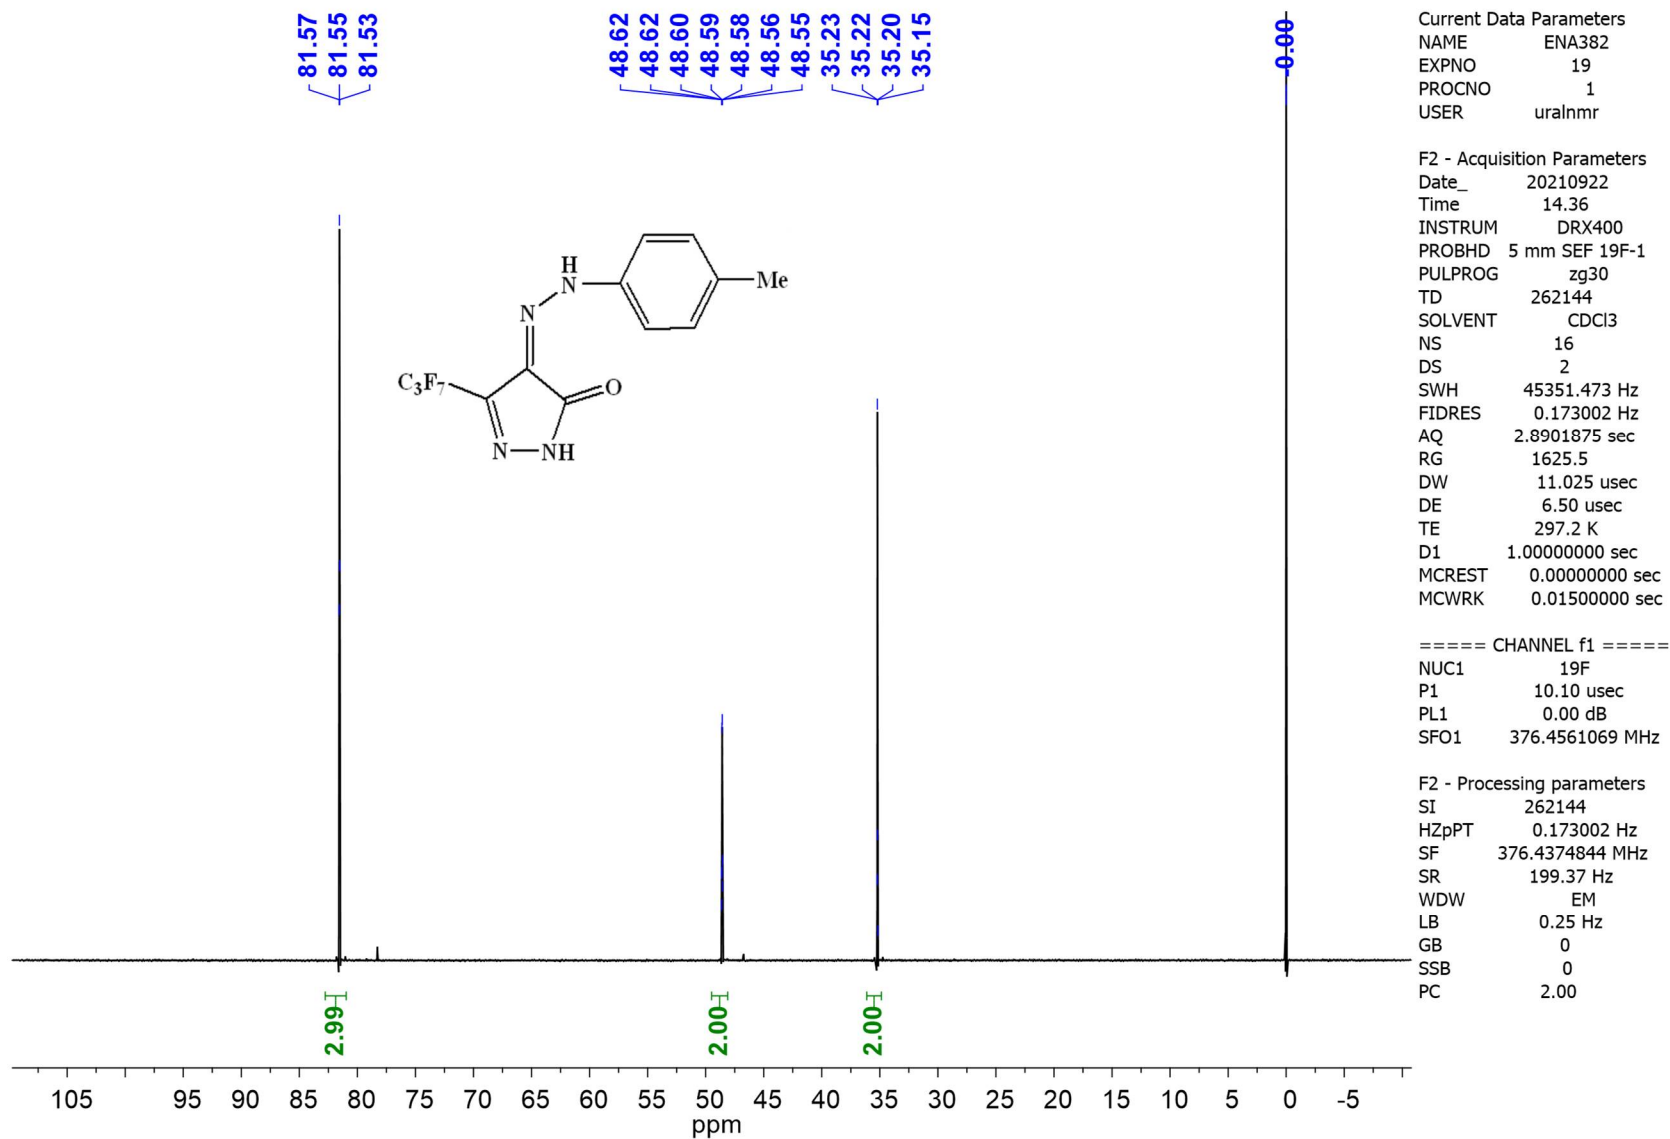

Figure S82. <sup>1</sup>H NMR spectrum of compound **7b**

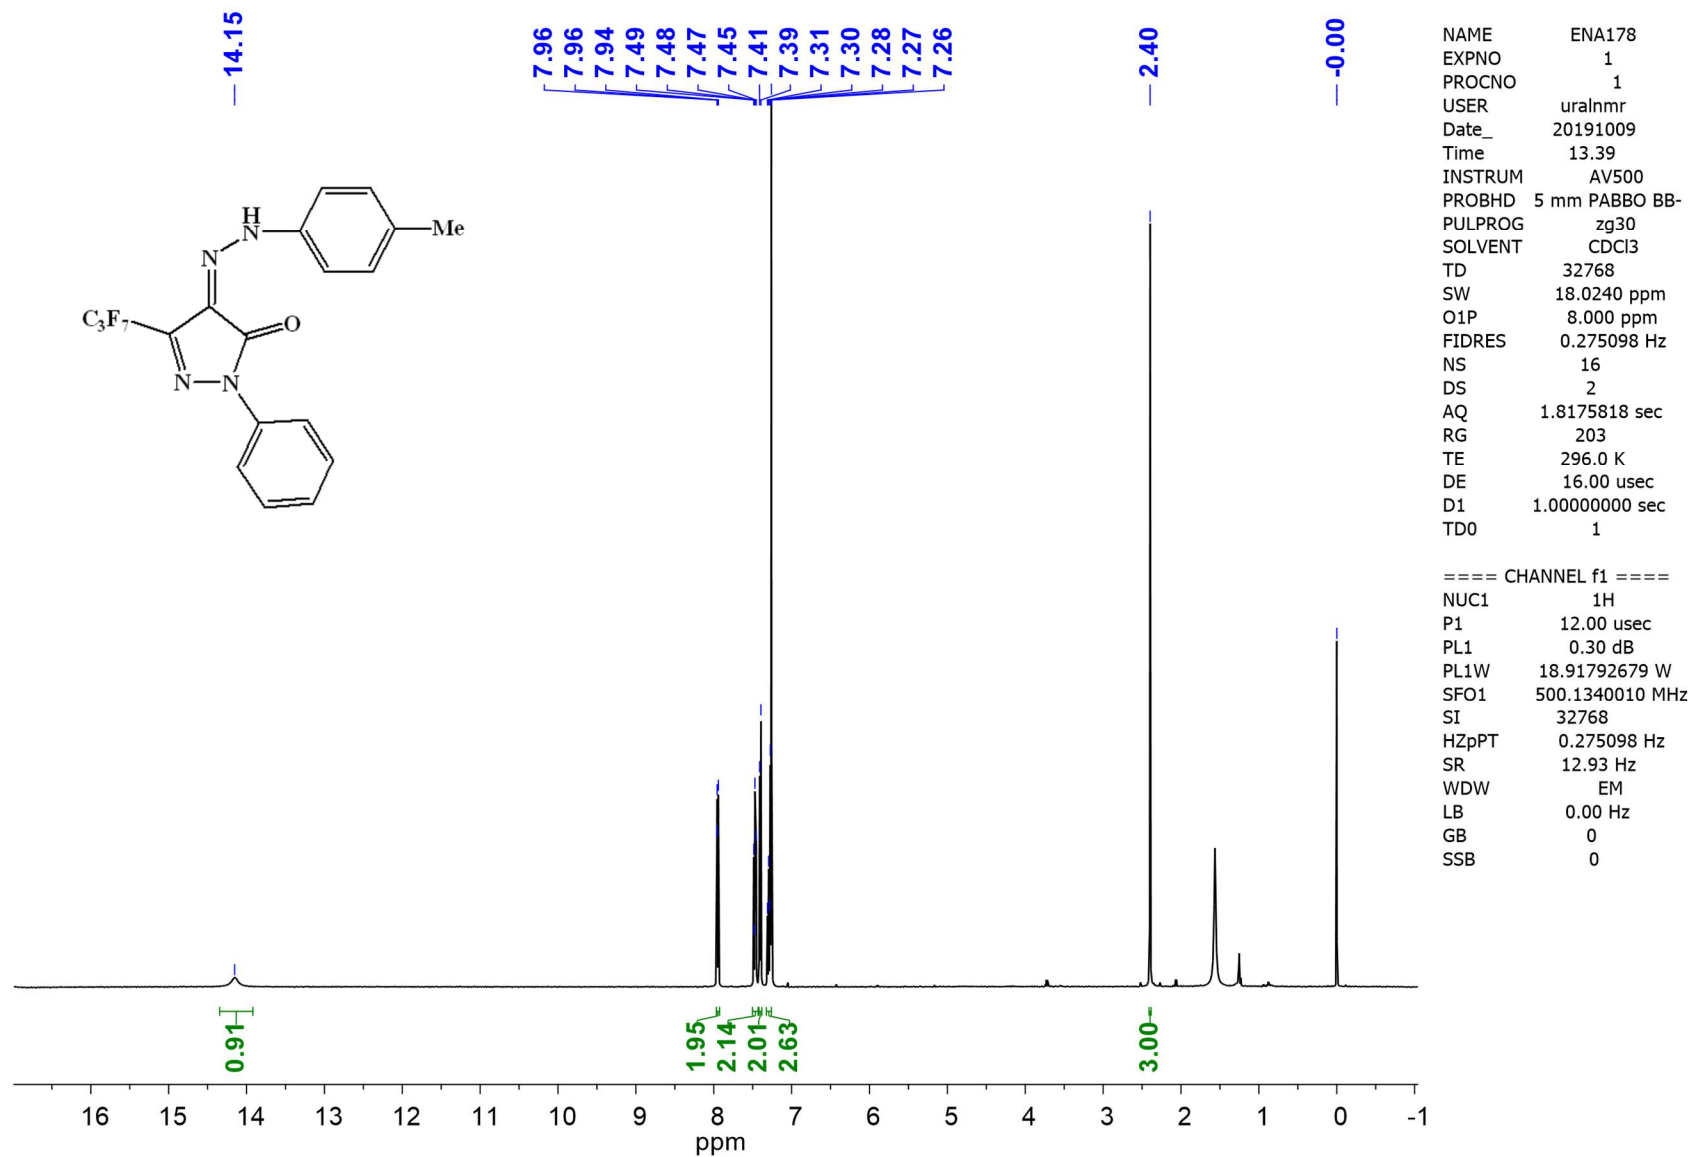

Figure S83.  $^{13}\text{C}$  NMR spectrum of compound **7b**

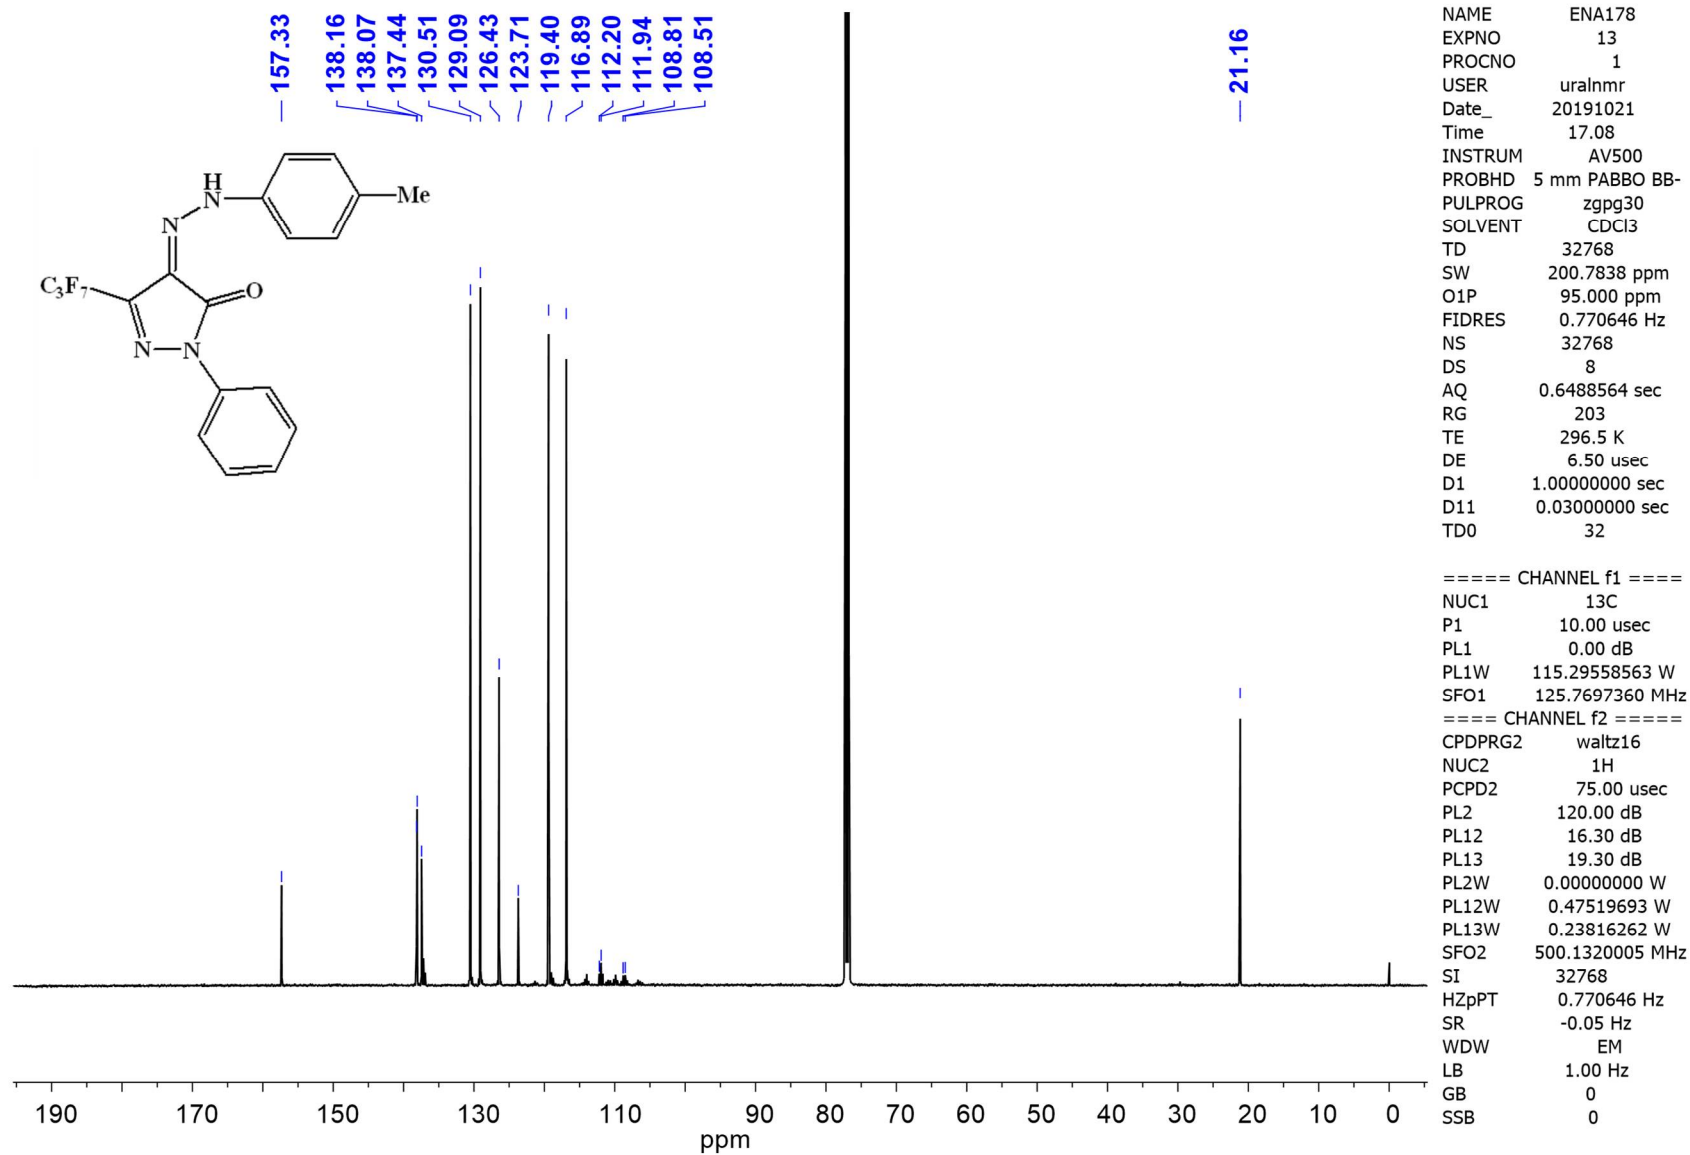

Figure S84.  $^{19}\text{F}$  NMR spectrum of compound **7b**

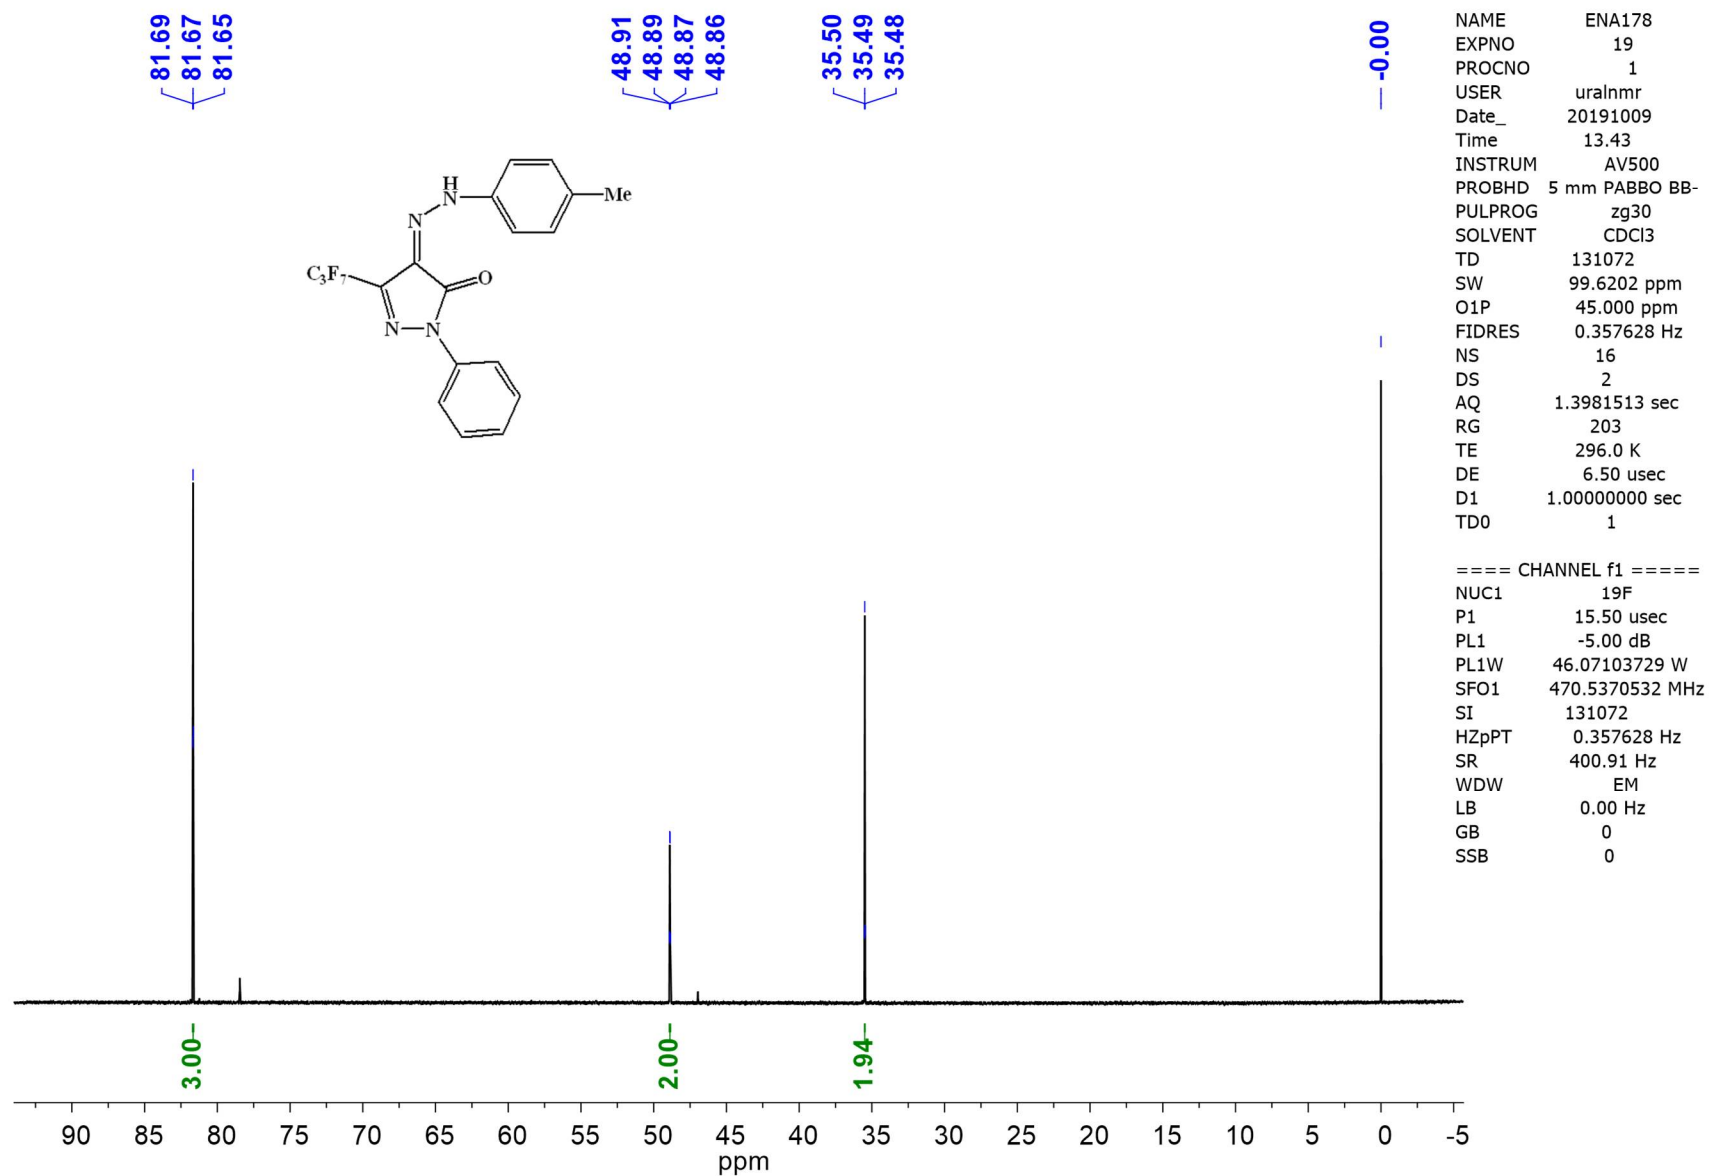

Figure S85. <sup>1</sup>H NMR spectrum of compound 8a

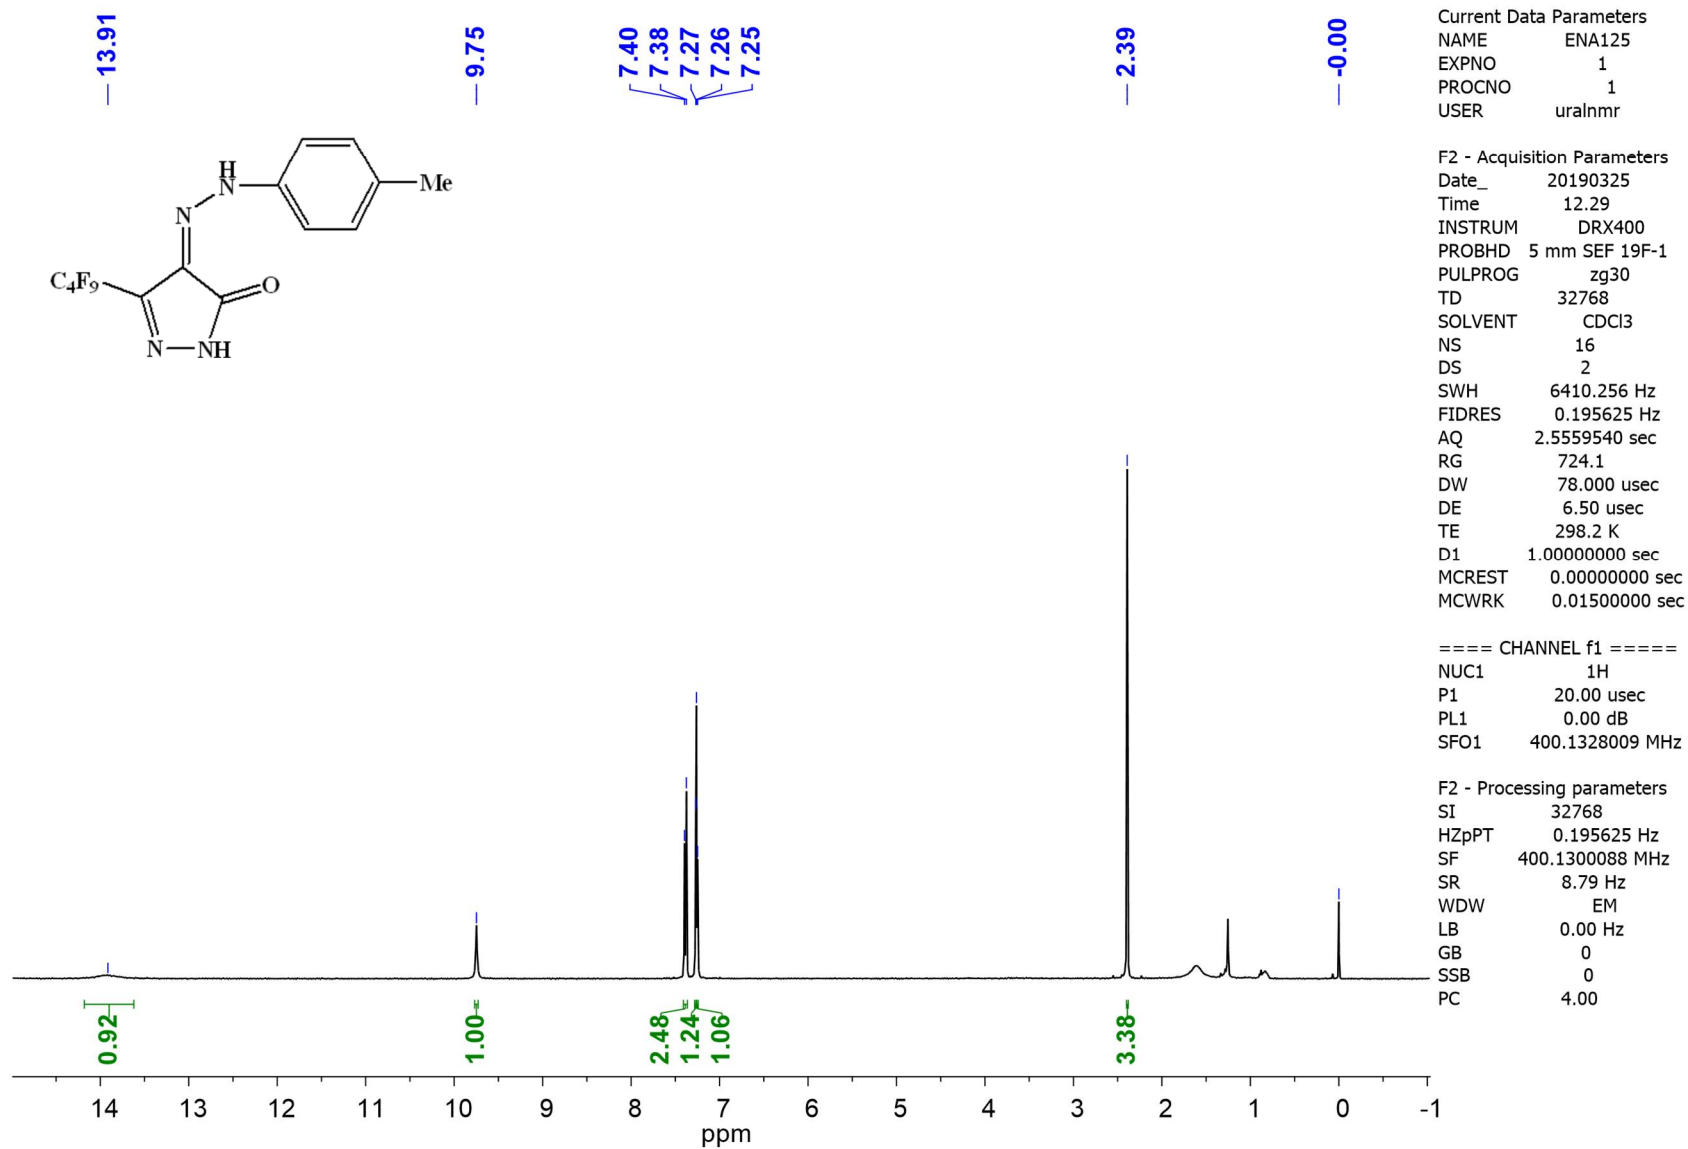



Figure S86.  $^{13}\text{C}$  NMR spectrum of compound 8a

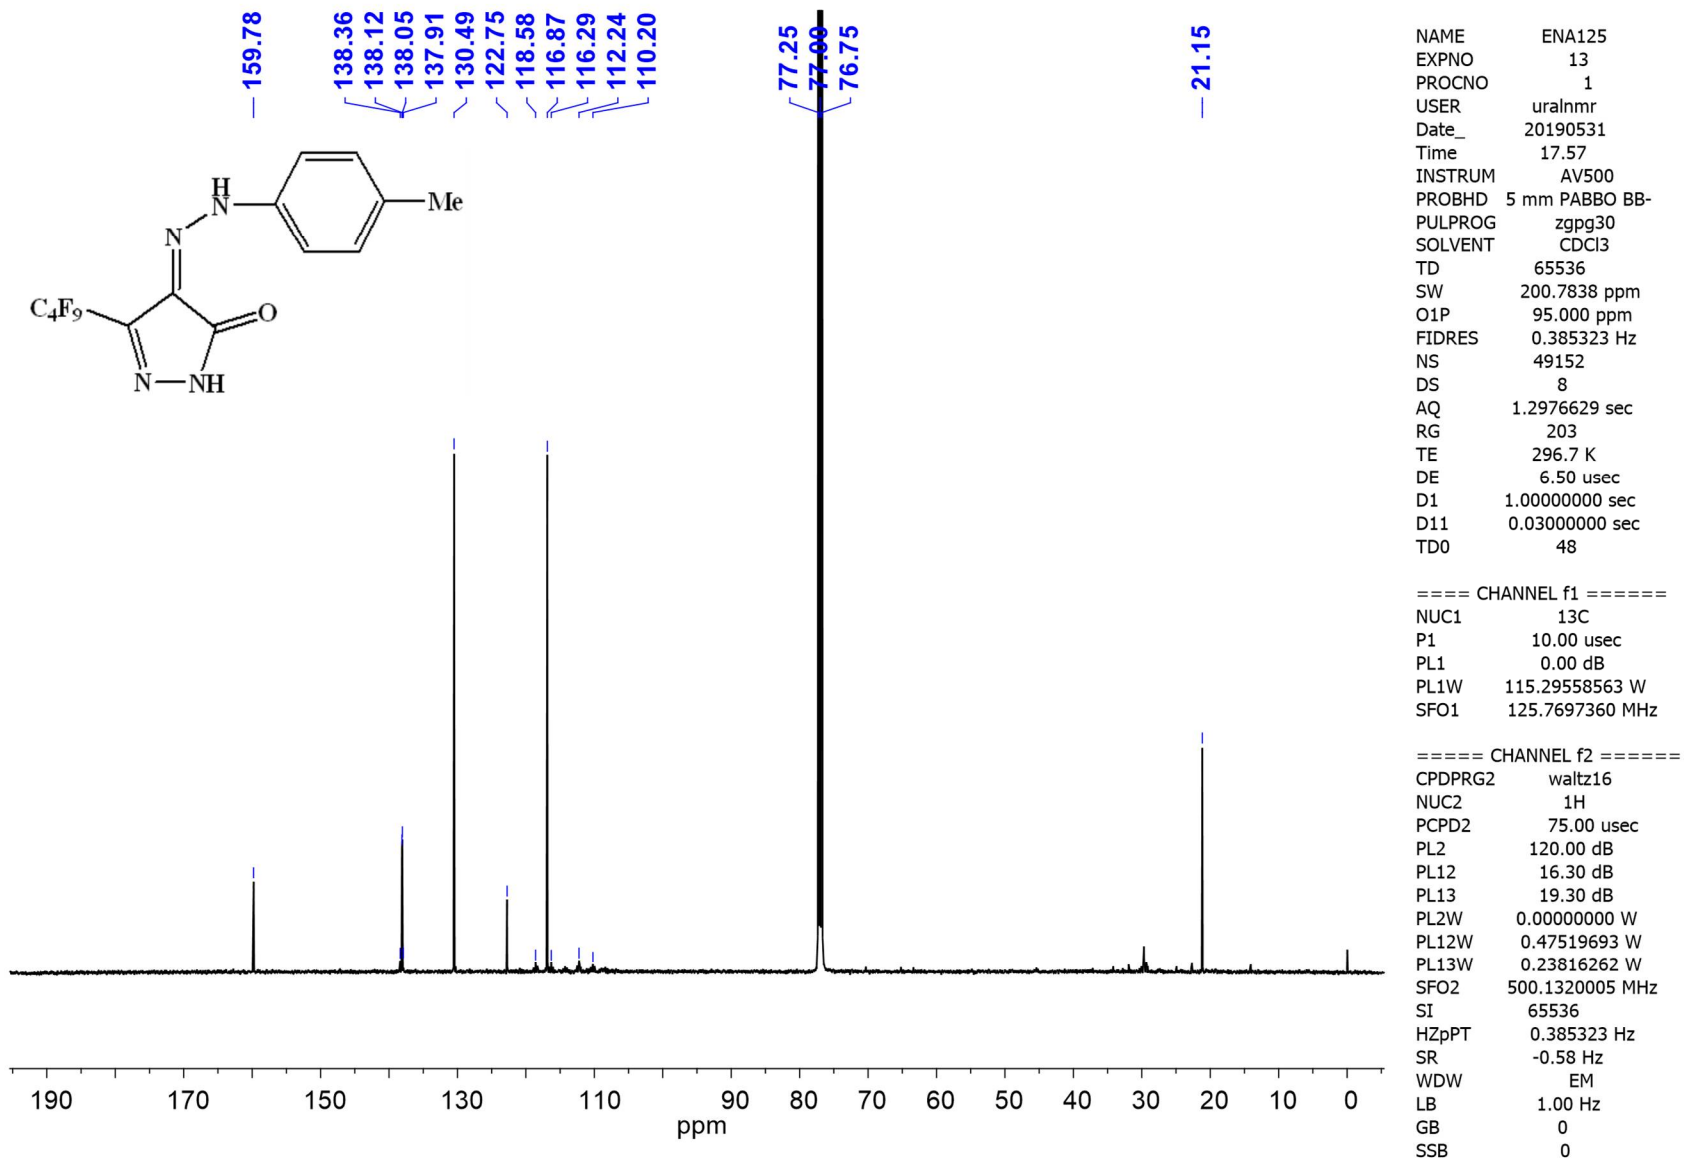

Figure S87.  $^{19}\text{F}$  NMR spectrum of compound **8a**

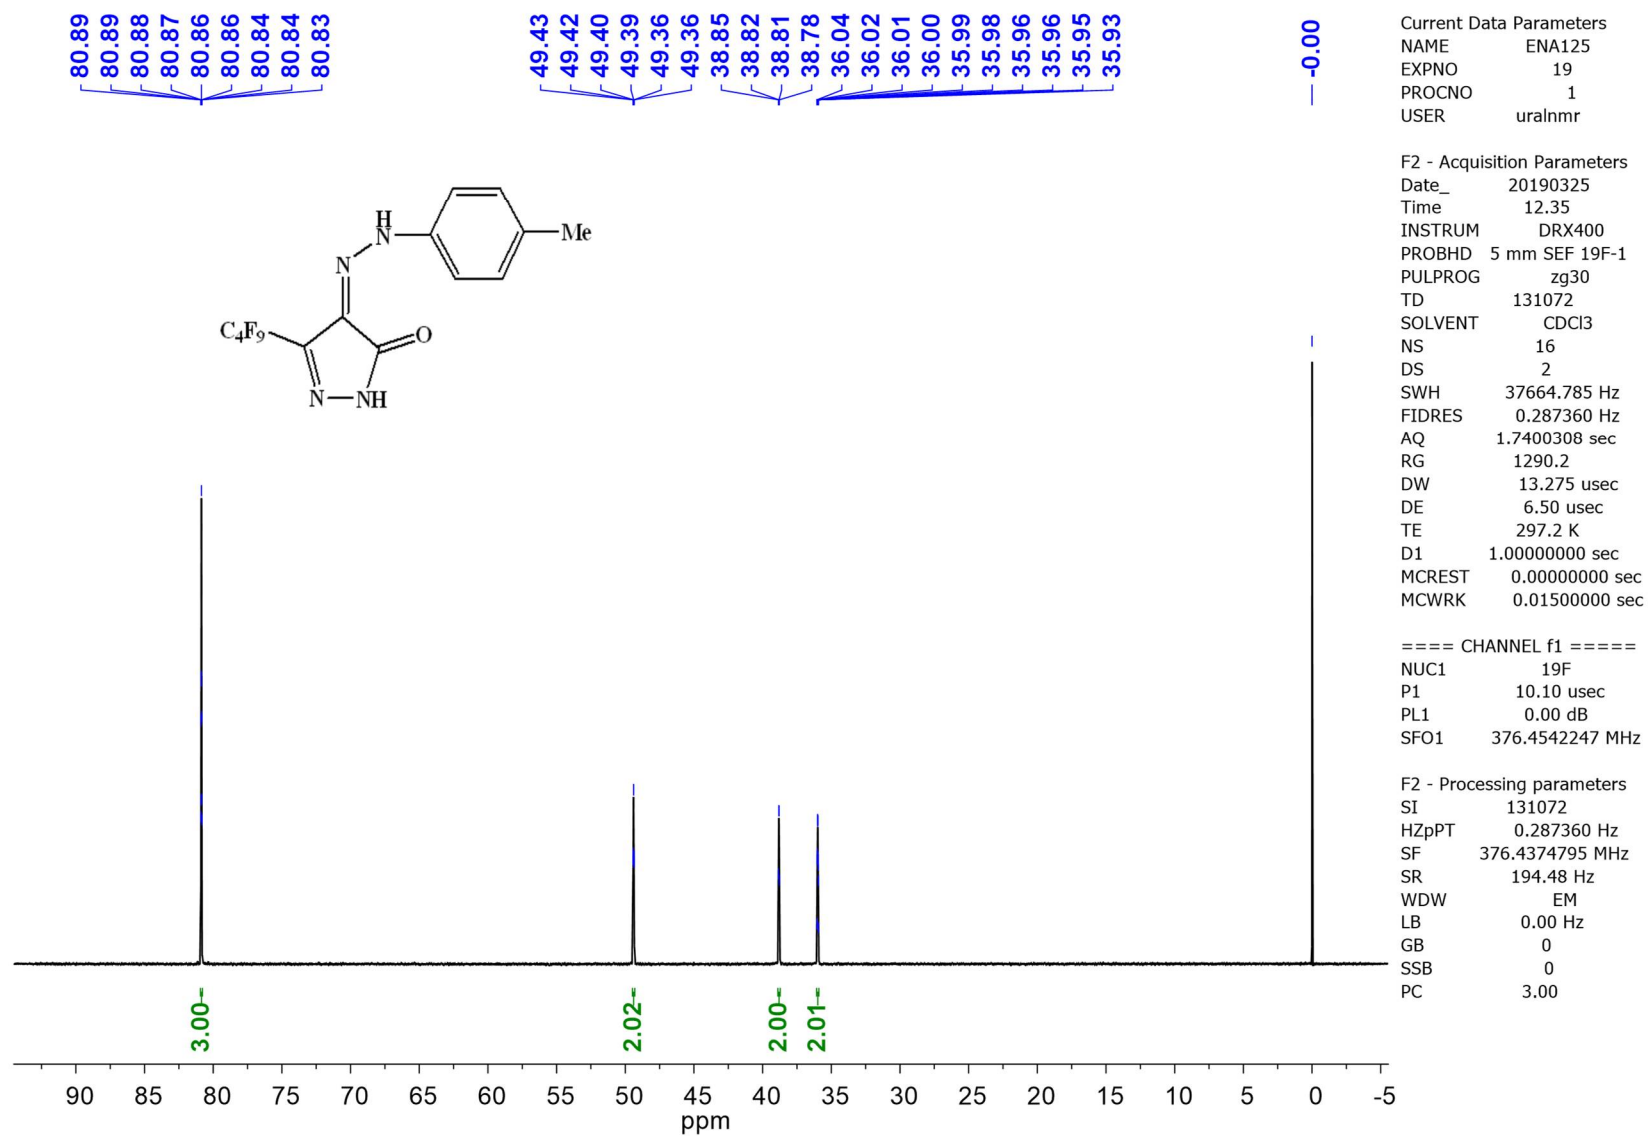

Figure S88. <sup>1</sup>H NMR spectrum of compound **8b**

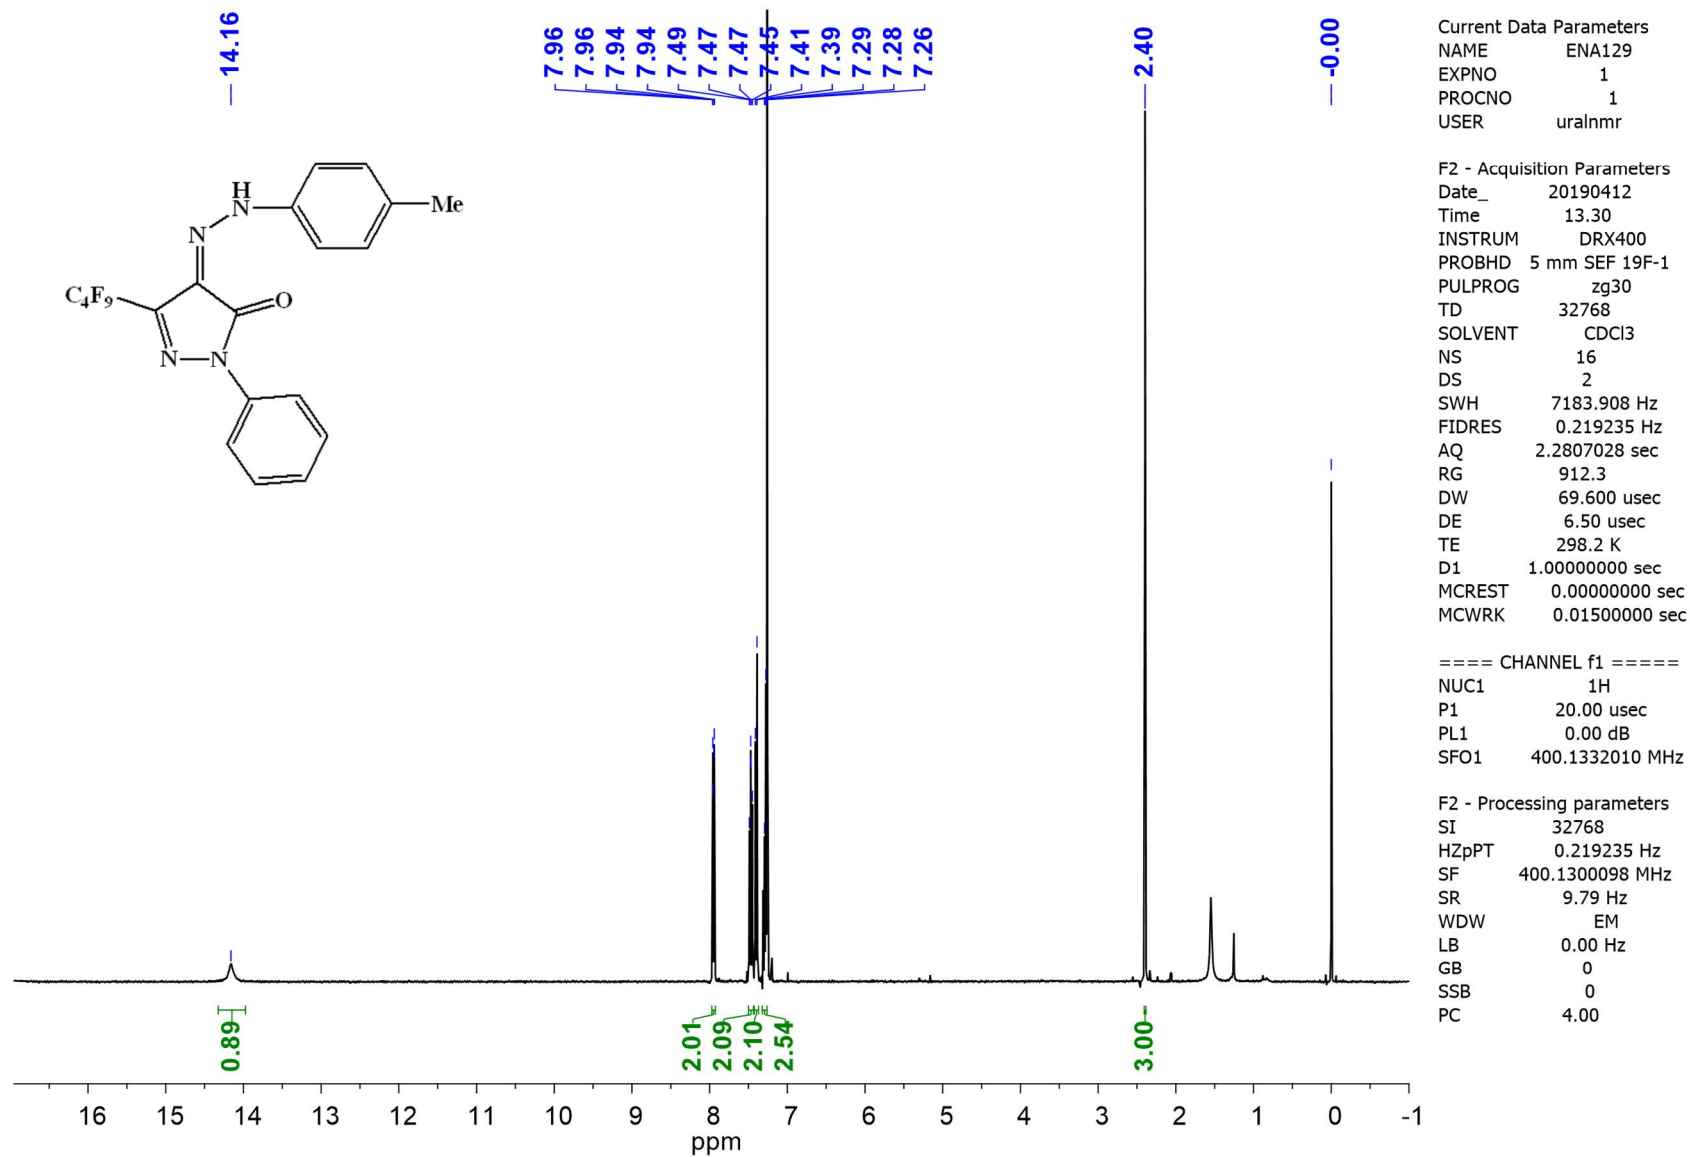

Figure S89.  $^{13}\text{C}$  NMR spectrum of compound **8b**

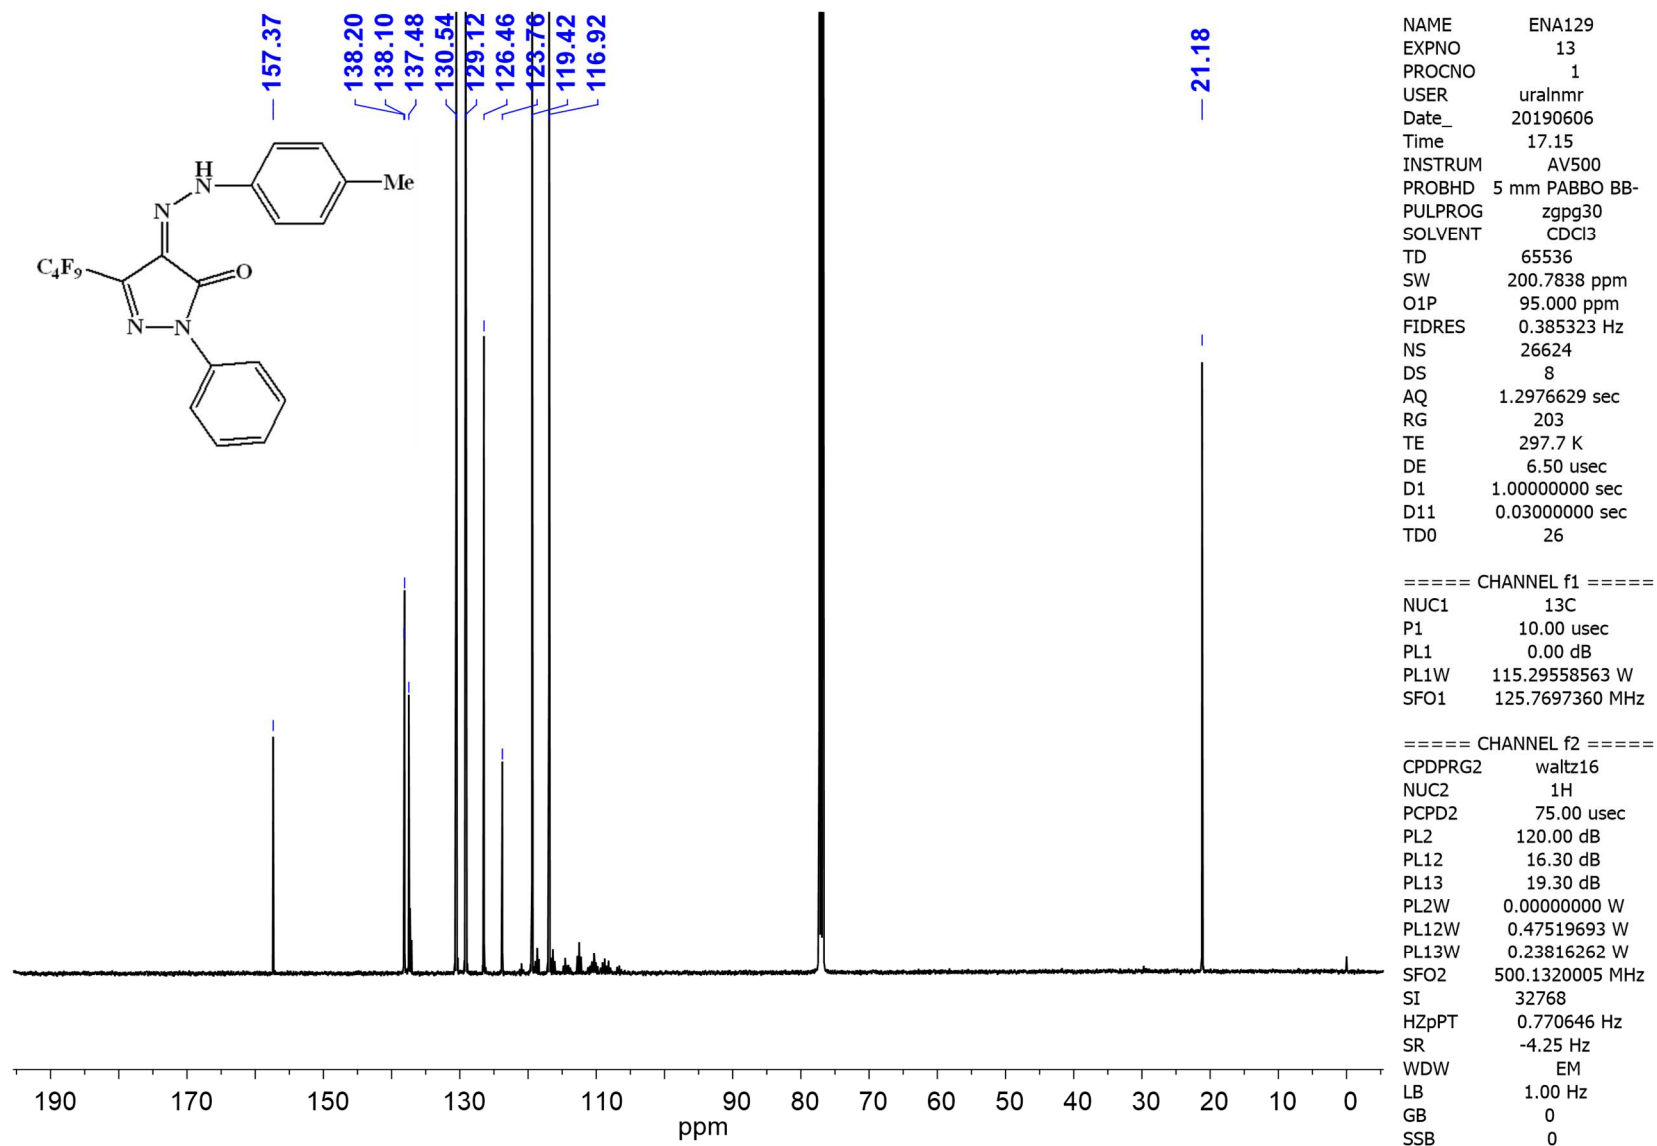

Figure S90.  $^{19}\text{F}$  NMR spectrum of compound **8b**

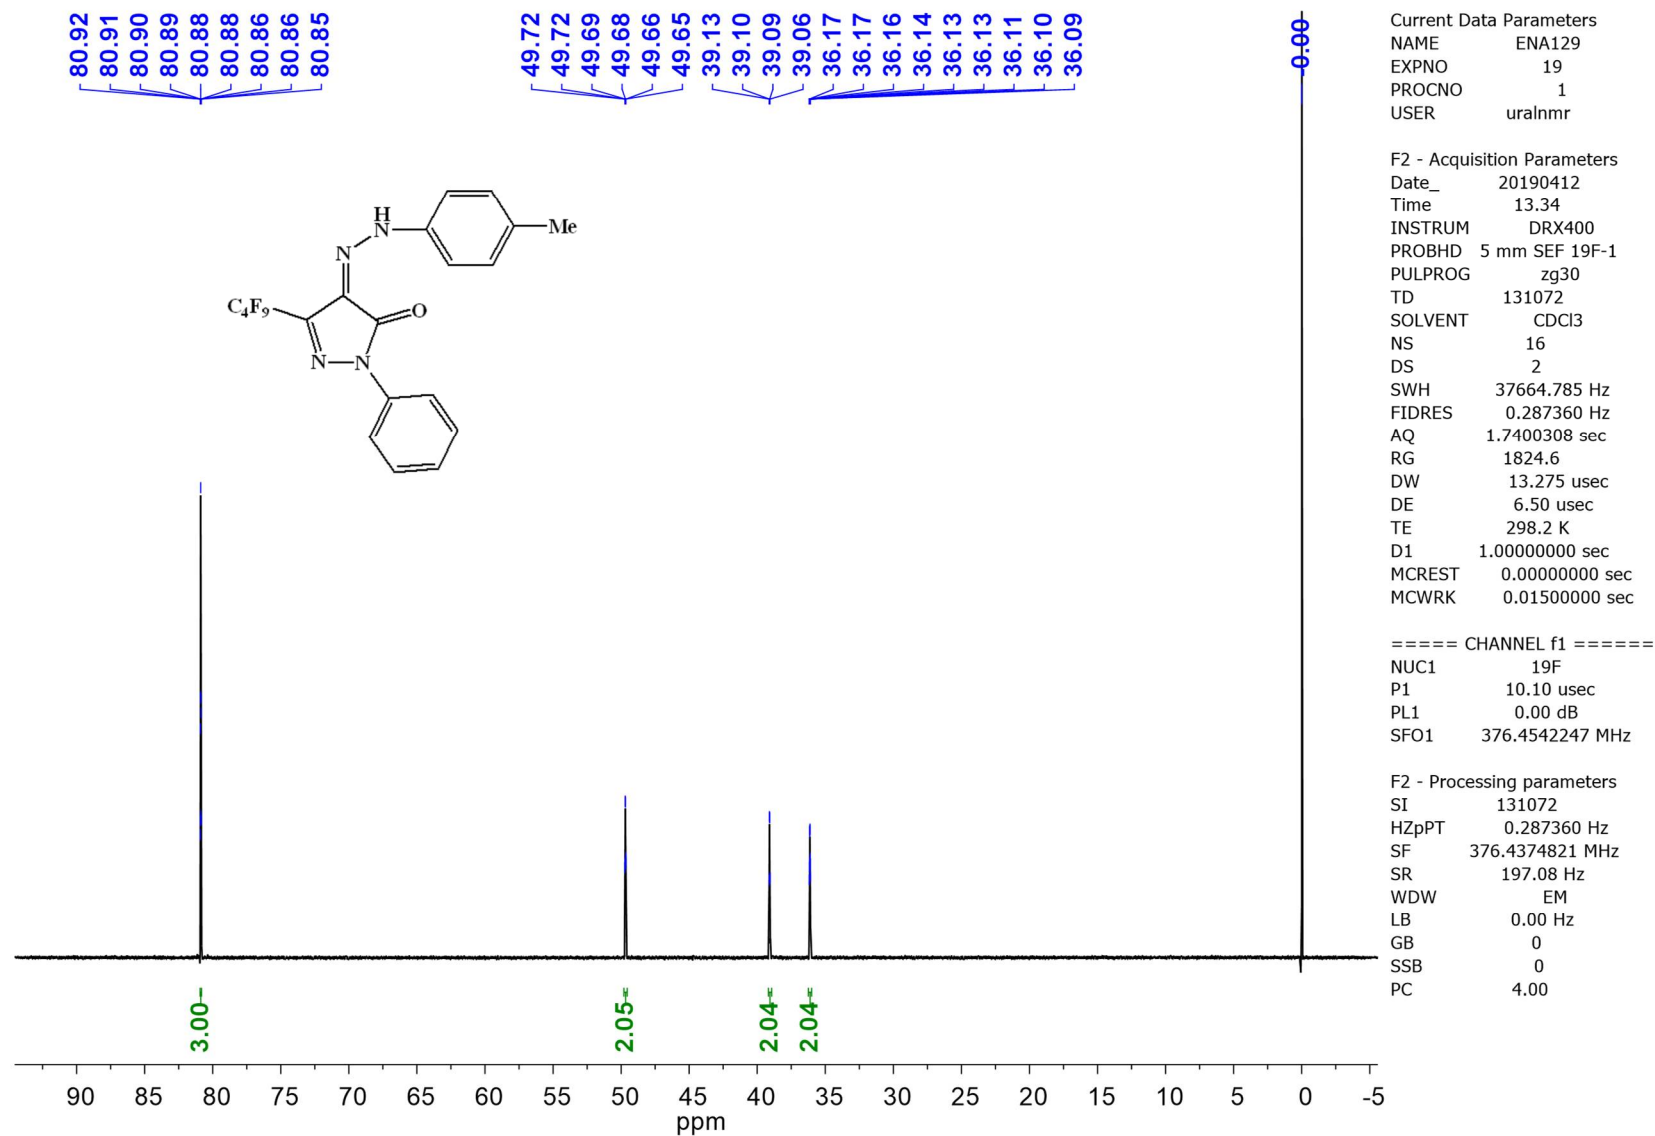

Figure S91. <sup>1</sup>H NMR spectrum of compound **9a**

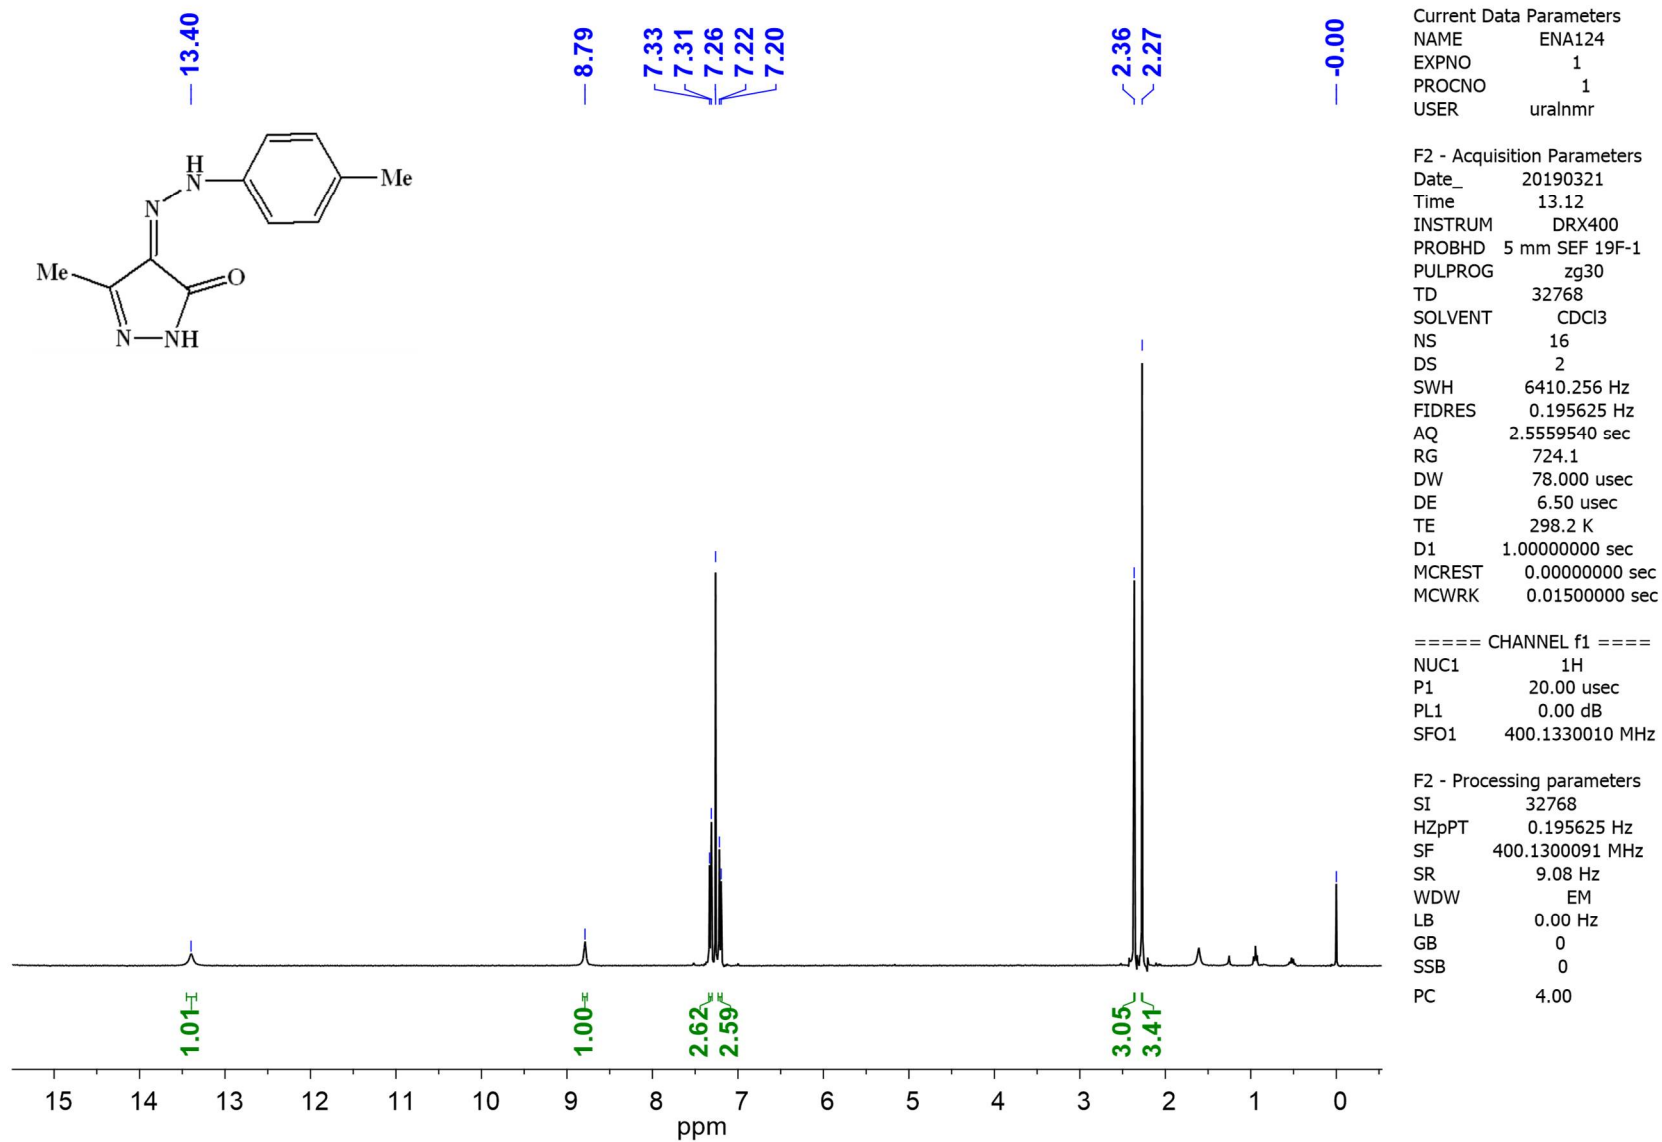

Figure S92.  $^{13}\text{C}$  NMR spectrum of compound 9a

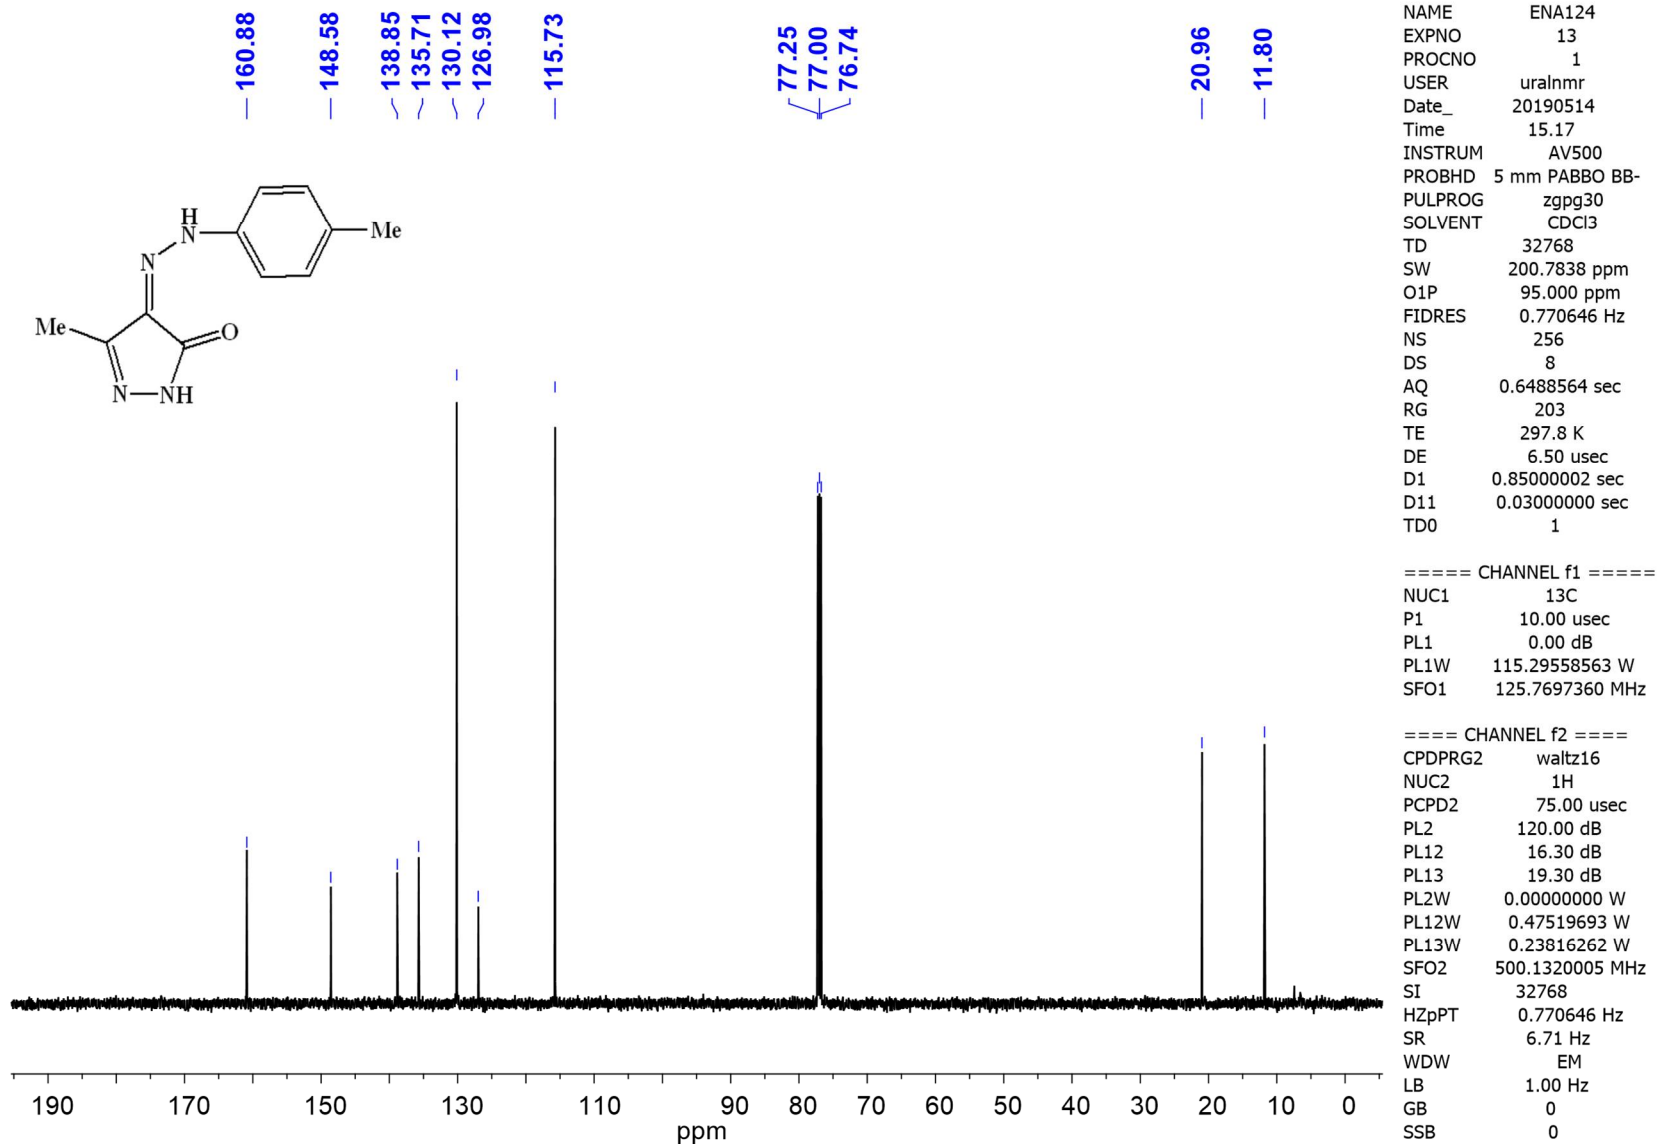

Figure S93. <sup>1</sup>H NMR spectrum of compound **9b**

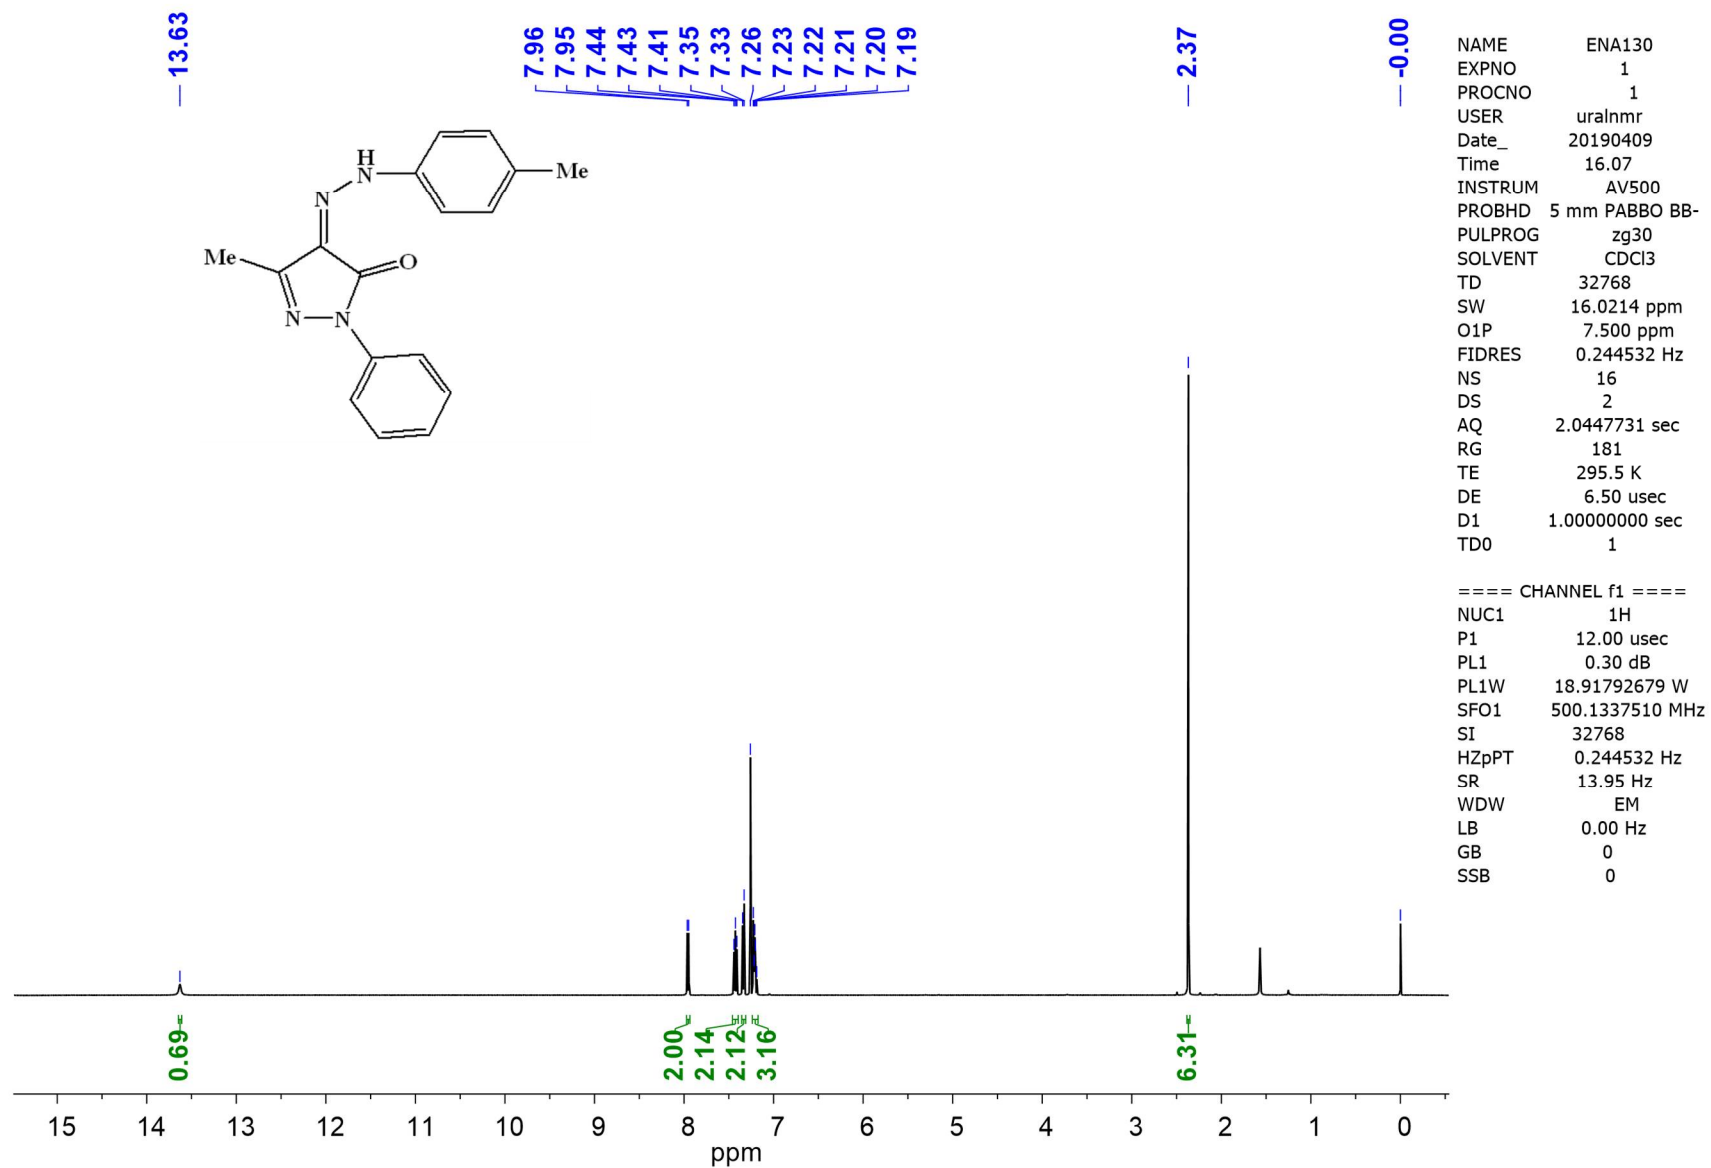



Figure S94.  $^{13}\text{C}$  NMR spectrum of compound **9b**

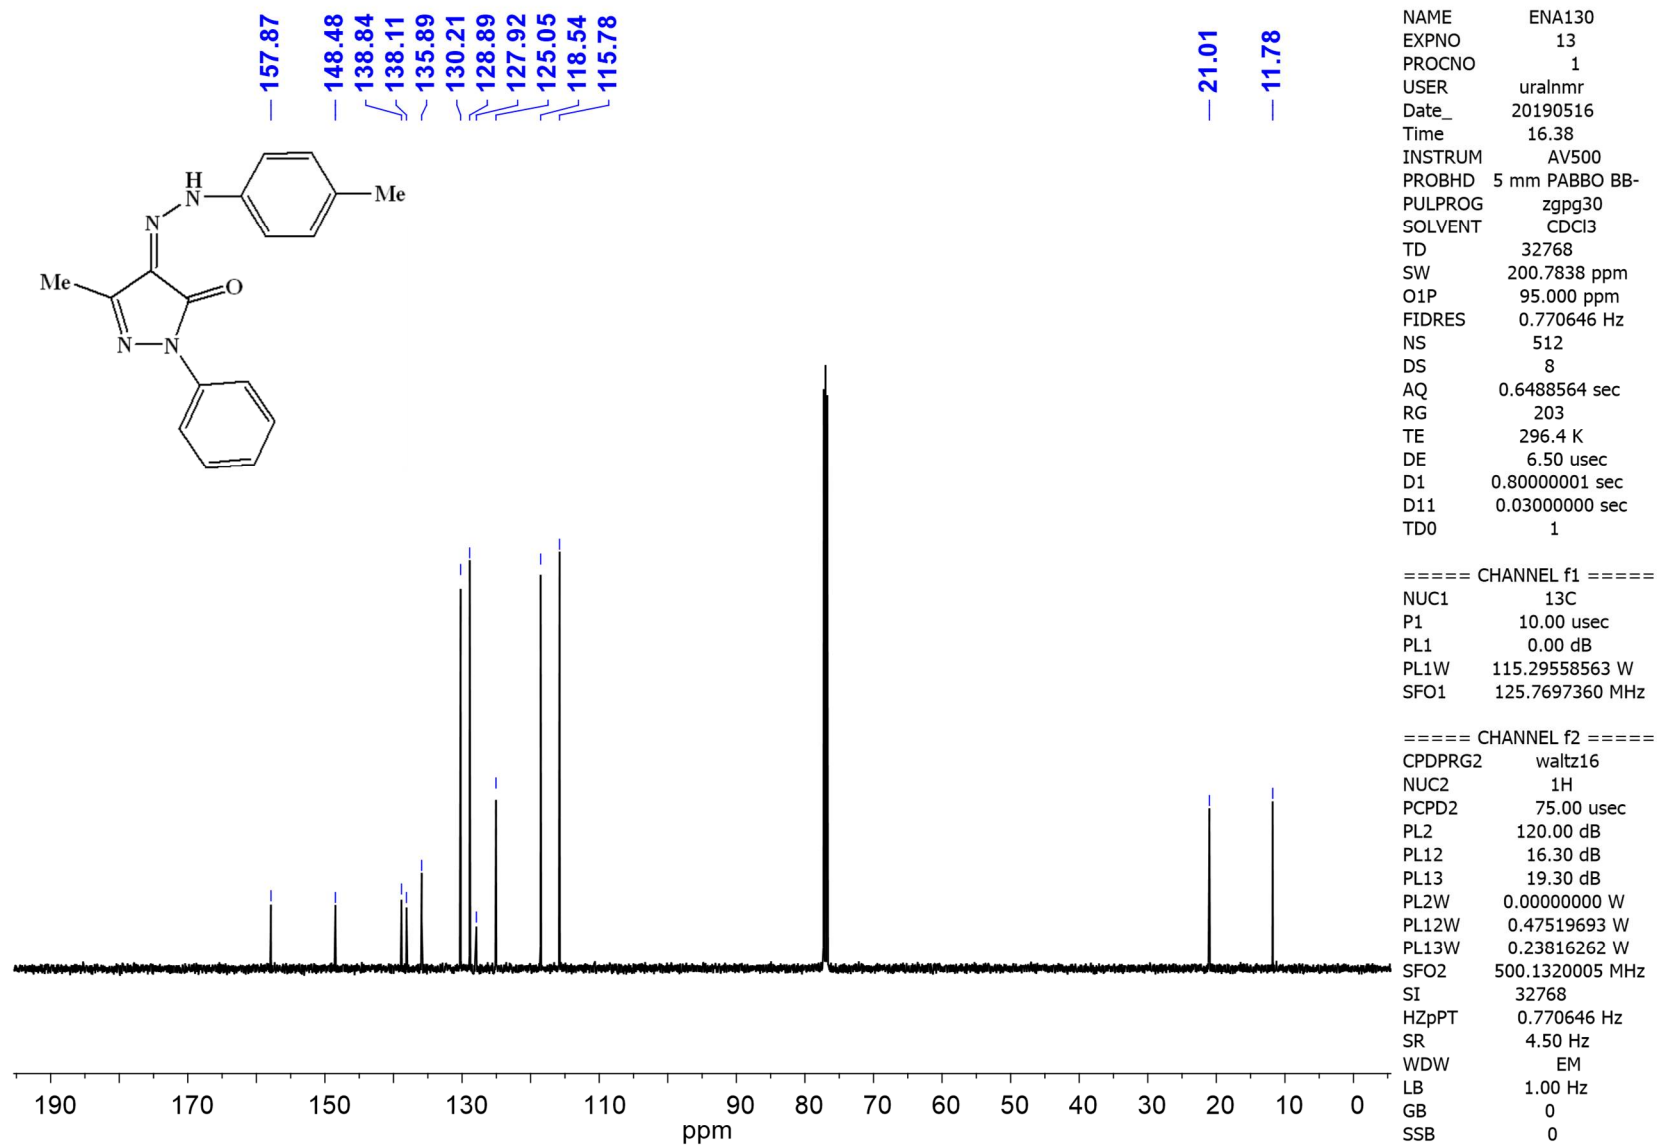

Supplement: s1 [file s1]
